# Supplementary material for: Proteomics-Derived Biomarker Panel Improves Diagnostic Precision to Classify Endometrioid and High-grade Serous Ovarian Carcinoma
Source: Oxford University Press journal article supplement (doi:10.1158/1078-0432.ccr-18-3818), 2019-04-12
Supplement: 10780432ccr183818-sup-212471_2_supp_5396214_ph9plx.xlsx [file 10780432ccr183818-sup-212471_2_supp_5396214_ph9plx.xlsx]

## Sheet: Supplmental Table S1
Supplemental Table S1: Patient characteristics
	Discovery set			Validation set
	HGSC	EC		HGSC	EC	Total
Number of samples	10	10		172	189	361
Age at diagnosis
Mean	64.3	55.8		61.3	54
Median	66	58.5		60	52
Range	41-78	36-82		39-92	25-91
FIGO stage
IA/IB	0	4		2	45
IC	5	3		2	40
II	0	2		9	64
III	4	1		146	29
IV	1	0		7	3
Unknown	0	0		6	8
Tumour grade
1	0	8		0	127
2	0	2		0	26
3	10	0		172	36
Alive	4	9		51	145
Deceased	6	1		121	44

## Sheet: Supplemental Table S2
Supplmental Table S2 : Instrument parameters for data acquisition
Parameter	Orbitrap Elite	Q Exactive Plus
Mass range	400-1500m/z	400-1500m/z
MS1 resolution (Orbitrap)	120K	70K
MS1 AGC target	1000000	3000000
MS1 Injection time	200ms	250ms
Lock mass	445.12	445.12
MS2 detection	IT	FT
MS2 scan rate	Rapid	n/a
MS2 AGC target	10000	200000
MS2 injection time	50ms	64ms
Top N	20	12
Isolation width	2	1.2
Isolation offset	n/a	0.5
MS2 Activation	CID	HCD
Normalized Collision Energy	35	25
Dynamic exclusion	enabled	enabled
Minimum signal required	1000	2000
Exclusion duration	30s	30s
Exclusion mass width low	0.5	n/a
Exclusion mass width high	1.5	n/a
Charge Exclusion	unassigned, 1, >8	unassigned, 1, >7

## Sheet: Supplemental Table S3
Supplemental Table S3 : Proteins quantified (log2 LFQ intensities) and detected (razor + unique peptides) by MaxQuant in ovarian tumour samples analyzed on a Orbitrap Elite mass spectrometer
T: Protein IDs	T: Majority protein IDs	T: Protein names	T: Gene names	LFQ intensity HGSC-1	LFQ intensity HGSC-2	LFQ intensity HGSC-3	LFQ intensity HGSC-4	LFQ intensity HGSC-5	LFQ intensity HGSC-6	LFQ intensity HGSC-7	LFQ intensity HGSC-8	LFQ intensity HGSC-9	LFQ intensity HGSC-10	LFQ intensity EC-1	LFQ intensity EC-2	LFQ intensity EC-3	LFQ intensity EC-4	LFQ intensity EC-5	LFQ intensity EC-6	LFQ intensity EC-7	LFQ intensity EC-8	LFQ intensity EC-9	LFQ intensity EC-10	Razor + unique peptides HGSC-1	Razor + unique peptides HGSC-2	Razor + unique peptides HGSC-3	Razor + unique peptides HGSC-4	Razor + unique peptides HGSC-5	Razor + unique peptides HGSC-6	Razor + unique peptides HGSC-7	Razor + unique peptides HGSC-8	Razor + unique peptides HGSC-9	Razor + unique peptides HGSC-10	Razor + unique peptides EC-1	Razor + unique peptides EC-2	Razor + unique peptides EC-3	Razor + unique peptides EC-4	Razor + unique peptides EC-5	Razor + unique peptides EC-6	Razor + unique peptides EC-7	Razor + unique peptides EC-8	Razor + unique peptides EC-9	Razor + unique peptides EC-10
A0A075B6I0	A0A075B6I0		IGLV8-61	22.452	NaN	22.2335	22.3535	24.229	23.5803	23.471	23.4076	25.6711	24.9142	23.5484	23.3944	25.3148	NaN	NaN	22.1877	24.5638	23.3863	26.2087	23.3151	1	NaN	1	1	1	1	2	2	1	1	1	1	2	NaN	NaN	1	1	1	2	1
A0A075B6I9;P04211	A0A075B6I9;P04211	Ig lambda chain V region 4A	IGLV7-46	22.8463	21.2009	23.1376	NaN	23.7404	24.7931	22.942	23.2981	NaN	NaN	NaN	23.6612	23.3951	NaN	22.4851	23.7617	NaN	NaN	NaN	23.8986	1	1	1	NaN	1	1	1	1	NaN	NaN	NaN	1	1	NaN	1	1	NaN	NaN	NaN	1
A0A075B6J9	A0A075B6J9		IGLV2-18	NaN	NaN	NaN	NaN	NaN	NaN	NaN	NaN	NaN	NaN	NaN	NaN	NaN	NaN	NaN	NaN	NaN	NaN	22.1434	NaN	NaN	NaN	NaN	NaN	NaN	NaN	1	NaN	NaN	NaN	NaN	NaN	NaN	NaN	NaN	NaN	NaN	NaN	1	NaN
A0A075B6K4	A0A075B6K4		IGLV3-10	23.004	26.4824	23.3476	23.7713	23.9754	24.44	25.386	24.0859	23.666	23.6835	24.2912	23.2659	25.5156	NaN	NaN	22.7889	24.4957	22.9216	24.82	24.5148	1	2	2	2	1	1	3	2	2	1	1	1	2	NaN	NaN	1	2	1	3	1
A0A075B6P5;P01615;A0A0A0MRZ7;A0A075B6S6;P06310	A0A075B6P5;P01615;A0A0A0MRZ7;A0A075B6S6;P06310	Ig kappa chain V-II region FR;Ig kappa chain V-II region RPMI 6410	IGKV2D-28;IGKV2D-26;IGKV2D-30	27.1496	28.9272	28.4886	25.5996	27.4645	27.543	29.8794	28.0003	27.9919	29.6896	28.3829	27.4539	29.0235	28.3055	27.9296	27.8947	28.5505	26.9313	29.0248	28.11	3	3	4	3	4	4	4	3	3	3	3	3	3	4	3	3	3	3	3	3
A0A075B6Q5	A0A075B6Q5		IGHV3-64	NaN	NaN	22.3111	NaN	NaN	NaN	21.2083	NaN	22.571	NaN	NaN	NaN	NaN	NaN	NaN	NaN	NaN	NaN	22.117	NaN	NaN	NaN	1	NaN	NaN	NaN	1	NaN	1	NaN	NaN	NaN	NaN	NaN	NaN	NaN	NaN	NaN	1	NaN
A0A075B6R2	A0A075B6R2		IGHV4-4	NaN	23.1984	NaN	22.6886	NaN	NaN	NaN	NaN	NaN	NaN	NaN	NaN	NaN	NaN	NaN	NaN	NaN	NaN	NaN	NaN	NaN	1	NaN	1	NaN	NaN	NaN	NaN	NaN	NaN	NaN	NaN	NaN	NaN	NaN	NaN	NaN	NaN	NaN	NaN
A0A075B6S2	A0A075B6S2		IGKV2D-29	22.7594	25.1727	22.3087	NaN	NaN	NaN	22.1486	NaN	23.5574	23.2163	NaN	NaN	23.1737	22.3173	23.1588	NaN	NaN	21.972	NaN	NaN	1	2	1	NaN	NaN	NaN	1	NaN	1	1	NaN	NaN	2	1	1	NaN	NaN	1	NaN	NaN
A0A075B6S5	A0A075B6S5		IGKV1-27	23.3814	25.8939	23.8092	NaN	22.2396	22.9325	22.2384	22.8191	22.9995	26.2253	23.5248	22.4818	25.1647	24.1944	23.4142	23.3198	24.1807	NaN	24.7208	22.8667	1	3	2	NaN	1	1	1	1	1	3	2	1	3	1	2	1	3	NaN	2	2
A0A087WSY6	A0A087WSY6		IGKV3D-15	22.627	21.9134	23.0997	NaN	22.2396	21.802	22.3061	22.9278	22.8931	23.0014	22.8265	21.9684	22.7041	24.0247	22.1411	21.6435	22.7458	21.5547	23.4025	23.0029	1	1	1	NaN	1	1	1	1	1	1	1	1	1	1	1	1	1	1	1	1
A0A087WW87;P01614	A0A087WW87;P01614	Ig kappa chain V-II region Cum	IGKV2-40	NaN	NaN	NaN	NaN	NaN	NaN	NaN	NaN	NaN	23.7293	NaN	NaN	22.2364	NaN	NaN	NaN	NaN	NaN	NaN	NaN	1	NaN	NaN	NaN	NaN	NaN	NaN	NaN	NaN	1	1	NaN	1	NaN	NaN	NaN	NaN	NaN	NaN	NaN
A0A0A0MS15	A0A0A0MS15		IGHV3-49	23.8849	23.8247	25.5779	22.6992	25.5247	23.6753	24.4945	24.1508	24.6619	24.678	24.185	23.4292	24.7453	25.3786	25.0157	23.3761	25.1211	22.8202	25.7437	24.9259	2	2	2	3	3	1	3	2	3	2	2	1	3	2	3	3	3	1	2	3
A0A0A0MT36	A0A0A0MT36		IGKV6D-21	NaN	NaN	NaN	NaN	NaN	NaN	21.5368	NaN	21.9425	NaN	NaN	NaN	NaN	NaN	NaN	NaN	NaN	21.1339	NaN	NaN	NaN	NaN	NaN	NaN	NaN	NaN	1	NaN	1	NaN	NaN	NaN	NaN	NaN	1	NaN	NaN	1	NaN	NaN
A0A0B4J1U3	A0A0B4J1U3		IGLV1-36	NaN	22.1324	NaN	NaN	NaN	NaN	NaN	NaN	NaN	NaN	NaN	NaN	NaN	NaN	NaN	NaN	22.5462	NaN	22.5711	NaN	NaN	1	NaN	NaN	NaN	NaN	NaN	NaN	NaN	NaN	NaN	NaN	NaN	NaN	NaN	NaN	1	NaN	1	NaN
A0A0B4J1U7	A0A0B4J1U7		IGHV6-1	25.1693	22.7035	23.4021	24.9659	23.6966	NaN	26.0271	22.6453	23.4917	27.711	25.7114	23.374	25.654	24.8677	24.9593	22.1196	23.1963	22.2629	24.8594	23.4194	2	1	1	1	2	1	1	2	2	3	1	1	2	1	2	1	1	1	1	1
A0A0B4J1V0	A0A0B4J1V0		IGHV3-15	NaN	23.9843	NaN	25.2173	24.5226	23.8348	25.6339	23.8339	23.4691	24.4773	24.4427	22.9925	25.5005	NaN	23.1337	23.838	24.183	23.8606	23.9656	NaN	NaN	2	NaN	2	2	2	2	1	1	2	2	1	2	1	1	2	2	2	1	1
A0A0B4J1V1;P01763;P01762	A0A0B4J1V1;P01763;P01762	Ig heavy chain V-III region WEA;Ig heavy chain V-III region TRO	IGHV3-21	23.9789	26.4905	25.8507	24.5271	24.8785	24.6044	26.0048	24.2365	25.2277	24.9116	24.2044	24.7605	25.7354	24.9498	22.8447	24.314	23.9349	23.9129	27.2943	25.5208	1	3	1	2	1	1	1	2	1	2	1	1	1	1	1	1	1	1	3	1
A0A0B4J1V2	A0A0B4J1V2		IGHV2-26	22.2464	NaN	23.0253	NaN	NaN	NaN	NaN	22.7977	22.5469	NaN	23.7922	NaN	22.666	23.3913	NaN	NaN	22.975	NaN	NaN	21.976	2	NaN	2	NaN	NaN	NaN	NaN	1	1	NaN	1	NaN	2	1	1	NaN	2	NaN	NaN	1
A0A0B4J1X5	A0A0B4J1X5		IGHV3-74	23.8134	26.4954	24.2627	23.423	23.3372	24.0206	23.3445	24.3513	24.8279	26.4796	24.2846	23.7292	NaN	24.234	24.4926	23.9457	24.3899	NaN	25.1206	NaN	2	2	2	2	1	1	1	2	1	1	1	1	NaN	2	1	1	1	NaN	2	NaN
A0A0B4J1X8	A0A0B4J1X8		IGHV3-43	22.4312	25.6614	NaN	21.4411	NaN	21.7865	25.9902	22.3378	21.9179	22.5117	22.3382	22.2126	22.3289	NaN	NaN	NaN	22.1674	NaN	22.1017	21.8138	1	1	NaN	2	NaN	1	1	1	1	1	1	1	1	NaN	NaN	NaN	1	NaN	1	1
A0A0B4J1Y9	A0A0B4J1Y9		IGHV3-72	24.8691	27.2343	25.623	25.0115	25.185	25.0333	24.498	25.4212	25.6813	26.3902	25.1481	25.0667	25.9967	25.8182	24.9104	24.7028	25.2187	24.2967	25.334	24.9968	2	3	2	2	2	2	3	3	2	1	1	2	3	3	2	2	2	2	2	2
P0DP09;A0A0B4J2D9	P0DP09;A0A0B4J2D9		IGKV1D-13	NaN	23.78	NaN	NaN	NaN	24.6472	NaN	NaN	NaN	NaN	NaN	NaN	NaN	NaN	NaN	21.8022	NaN	NaN	NaN	NaN	NaN	2	NaN	NaN	NaN	1	NaN	NaN	NaN	NaN	NaN	NaN	NaN	NaN	NaN	2	NaN	NaN	NaN	NaN
A0A0B4J2H0	A0A0B4J2H0		IGHV1-69-2	25.3985	28.8674	26.2541	24.091	26.0884	25.7381	26.3679	25.624	25.5465	26.5906	25.3981	25.1311	26.7624	26.1155	25.0135	24.5835	25.8383	24.0011	26.2603	25.8722	2	4	1	1	1	1	1	1	1	1	1	1	1	1	1	1	1	1	1	1
A0A0C4DH24	A0A0C4DH24		IGKV6-21	NaN	NaN	NaN	NaN	NaN	NaN	NaN	NaN	NaN	NaN	NaN	NaN	NaN	21.9523	NaN	NaN	NaN	NaN	NaN	NaN	NaN	NaN	NaN	NaN	NaN	NaN	NaN	NaN	NaN	NaN	NaN	NaN	NaN	1	NaN	NaN	NaN	NaN	NaN	NaN
A0A0C4DH29	A0A0C4DH29		IGHV1-3	NaN	NaN	22.2915	23.0463	NaN	NaN	21.9866	NaN	NaN	NaN	NaN	NaN	NaN	NaN	NaN	NaN	NaN	NaN	22.3055	NaN	NaN	NaN	1	2	NaN	NaN	1	NaN	NaN	1	NaN	NaN	NaN	NaN	NaN	NaN	NaN	NaN	1	NaN
A0A0C4DH31	A0A0C4DH31		IGHV1-18	24.194	26.9945	25.111	24.7515	23.9423	24.6447	25.9741	25.1158	24.1688	25.3945	22.3804	24.706	26.2346	24.8632	23.7332	23.0113	24.6395	NaN	NaN	24.9528	2	2	2	2	2	1	2	2	1	1	2	2	1	1	1	1	2	NaN	NaN	2
A0A0C4DH32	A0A0C4DH32		IGHV3-20	NaN	NaN	NaN	NaN	NaN	NaN	NaN	NaN	NaN	NaN	NaN	NaN	NaN	NaN	NaN	NaN	NaN	NaN	29.2647	NaN	NaN	NaN	NaN	NaN	NaN	NaN	NaN	NaN	NaN	NaN	NaN	NaN	NaN	NaN	NaN	NaN	NaN	NaN	3	NaN
A0A0C4DH33	A0A0C4DH33		IGHV1-24	NaN	NaN	NaN	NaN	NaN	21.1034	NaN	NaN	NaN	NaN	NaN	NaN	22.2221	NaN	NaN	NaN	NaN	NaN	NaN	NaN	NaN	NaN	NaN	NaN	NaN	1	NaN	NaN	NaN	NaN	NaN	NaN	1	NaN	NaN	NaN	NaN	NaN	NaN	NaN
A0A0C4DH34	A0A0C4DH34		IGHV4-28	24.2764	28.151	24.5091	23.8666	23.449	24.168	23.99	24.3658	24.4831	25.9151	25.6145	24.2644	26.6763	26.2122	23.5931	24.3453	24.2193	23.4385	26.5832	25.2656	1	1	1	1	1	1	1	1	1	1	1	2	1	2	1	1	1	1	2	1
A0A0C4DH38	A0A0C4DH38		IGHV5-51	24.6231	29.3529	26.1578	25.5613	25.9572	25.7783	27.2328	26.562	25.1128	28.155	25.9378	25.3537	27.1732	26.5675	25.5978	24.5133	26.0128	24.1974	27.4868	26.4463	3	4	4	3	3	4	4	4	3	4	3	3	4	4	3	3	4	3	4	4
A0A0C4DH67;A0A0C4DH69	A0A0C4DH67;A0A0C4DH69		IGKV1-8;IGKV1-9	NaN	26.3141	NaN	NaN	NaN	21.8543	NaN	22.717	NaN	23.7792	NaN	NaN	NaN	NaN	21.6498	21.4206	NaN	NaN	NaN	NaN	NaN	1	NaN	NaN	NaN	1	NaN	1	NaN	1	NaN	NaN	NaN	NaN	1	1	NaN	NaN	1	NaN
A0A0C4DH68	A0A0C4DH68		IGKV2-24	22.7308	22.9475	24.9399	23.0368	23.8569	23.3299	NaN	24.3012	22.6241	25.8646	24.3951	NaN	NaN	24.6146	22.148	24.0596	23.6454	NaN	23.9525	NaN	2	1	1	1	1	2	NaN	2	2	1	1	NaN	NaN	2	1	1	2	NaN	1	NaN
A0A0C4DH72;P01599	A0A0C4DH72;P01599	Ig kappa chain V-I region Gal	IGKV1-6	NaN	27.3838	NaN	NaN	NaN	23.5035	NaN	NaN	NaN	NaN	23.9711	NaN	24.391	NaN	NaN	NaN	24.7746	NaN	NaN	NaN	NaN	1	NaN	NaN	NaN	1	NaN	NaN	NaN	NaN	1	NaN	1	NaN	NaN	NaN	1	NaN	NaN	NaN
A0A0C4DH73;P01611;P01601	A0A0C4DH73;P01611;P01601	Ig kappa chain V-I region Wes;Ig kappa chain V-I region HK101	IGKV1-12	NaN	24.3483	NaN	NaN	NaN	21.6965	21.9772	22.1769	NaN	NaN	21.1758	NaN	22.5595	21.3828	NaN	NaN	21.9394	NaN	24.1911	21.4031	NaN	1	NaN	NaN	NaN	1	1	1	NaN	NaN	1	NaN	1	1	NaN	NaN	1	NaN	1	1
A0AV96;A0AV96-2	A0AV96;A0AV96-2	RNA-binding protein 47	RBM47	25.925	24.2084	25.2496	25.6717	24.3065	23.1585	25.1567	26.1044	25.8049	NaN	24.6255	24.3216	25.146	25.7773	24.9109	25.3303	26.5647	25.0582	24.2807	25.0955	10	3	8	11	6	1	10	12	11	NaN	4	2	8	9	5	8	9	7	3	4
A0AVF1-2;A0AVF1-3;A0AVF1	A0AVF1-2;A0AVF1-3;A0AVF1	Intraflagellar transport protein 56	TTC26	NaN	NaN	NaN	NaN	22.0778	NaN	NaN	NaN	NaN	NaN	NaN	NaN	NaN	NaN	NaN	NaN	NaN	NaN	NaN	NaN	NaN	NaN	NaN	NaN	1	NaN	NaN	NaN	NaN	NaN	NaN	NaN	NaN	NaN	NaN	NaN	NaN	NaN	NaN	NaN
A0AVT1;A0AVT1-2;A0AVT1-3;A0AVT1-4	A0AVT1;A0AVT1-2	Ubiquitin-like modifier-activating enzyme 6	UBA6	26.331	27.0354	26.7243	27.4756	27.0465	26.7998	26.9641	27.6181	26.1942	26.7468	27.2358	26.7912	27.3291	27.0351	26.9947	27.4973	26.6141	27.2163	26.9478	27.0974	17	23	21	29	20	17	27	28	12	9	26	18	23	19	22	24	18	23	15	27
A0FGR8-2;A0FGR8;A0FGR8-6;A0FGR8-4;A0FGR8-5	A0FGR8-2;A0FGR8;A0FGR8-6;A0FGR8-4	Extended synaptotagmin-2	ESYT2	25.2234	25.6695	25.9554	25.8787	26.6534	26.237	25.8454	25.7826	25.5064	25.2309	25.9515	25.8214	25.6775	25.4422	26.0741	25.244	25.5427	25.4528	25.2388	25.0364	6	11	13	12	14	15	11	11	9	2	11	13	10	7	11	11	10	9	6	7
A0MZ66-6;A0MZ66;A0MZ66-3;A0MZ66-5;A0MZ66-4;A0MZ66-8;A0MZ66-2;A0MZ66-7	A0MZ66-6;A0MZ66;A0MZ66-3;A0MZ66-5;A0MZ66-4;A0MZ66-8;A0MZ66-2	Shootin-1	KIAA1598	26.3391	22.9457	NaN	26.2204	22.7948	NaN	23.4527	24.2201	23.8055	NaN	24.4828	24.7905	24.6009	25.5833	23.4629	24.3566	24.8447	24.2029	25.124	24.7386	9	4	NaN	13	3	NaN	5	7	5	1	10	5	8	9	9	6	7	6	4	9
A0PJW8	A0PJW8	Death-associated protein-like 1	DAPL1	NaN	NaN	21.7868	24.4317	NaN	NaN	21.77	NaN	NaN	NaN	NaN	NaN	NaN	NaN	NaN	NaN	NaN	NaN	NaN	NaN	NaN	NaN	1	2	NaN	NaN	1	NaN	NaN	NaN	NaN	NaN	NaN	NaN	NaN	NaN	NaN	NaN	NaN	NaN
A1A5D9-2;A1A5D9	A1A5D9-2;A1A5D9	Bicaudal D-related protein 2	CCDC64B	NaN	18.2323	NaN	18.4073	NaN	NaN	18.1926	NaN	NaN	NaN	NaN	NaN	NaN	17.6082	NaN	NaN	NaN	NaN	NaN	NaN	2	1	NaN	1	NaN	NaN	1	NaN	NaN	NaN	NaN	NaN	NaN	1	NaN	NaN	1	NaN	NaN	NaN
A1L0T0	A1L0T0	Acetolactate synthase-like protein	ILVBL	26.0708	25.5718	24.5058	25.654	26.3199	26.6845	25.396	26.4732	24.7203	22.5766	25.4054	24.9919	25.1354	24.2413	25.9474	25.1728	24.1008	25.1043	24.2993	25.0352	11	9	7	11	11	13	9	13	6	1	11	8	5	4	9	9	4	9	2	5
A1L170;A1L170-2	A1L170;A1L170-2	Uncharacterized protein C1orf226	C1orf226	NaN	NaN	NaN	NaN	NaN	NaN	NaN	NaN	NaN	NaN	NaN	NaN	NaN	NaN	22.9459	NaN	22.874	NaN	NaN	NaN	NaN	NaN	NaN	NaN	NaN	NaN	NaN	NaN	NaN	NaN	NaN	NaN	NaN	NaN	2	NaN	1	NaN	NaN	NaN
A1L4H1;A1L4H1-2	A1L4H1;A1L4H1-2	Soluble scavenger receptor cysteine-rich domain-containing protein SSC5D	SSC5D	NaN	NaN	22.4475	NaN	NaN	NaN	NaN	NaN	NaN	21.6204	NaN	NaN	NaN	NaN	NaN	NaN	NaN	NaN	NaN	NaN	NaN	NaN	1	NaN	NaN	NaN	NaN	NaN	NaN	1	NaN	NaN	NaN	NaN	NaN	NaN	NaN	NaN	NaN	NaN
A1X283;Q5TCZ1-2;Q5TCZ1-3;Q5TCZ1	A1X283	SH3 and PX domain-containing protein 2B	SH3PXD2B	NaN	26.0024	NaN	22.9787	23.3844	24.7065	23.6494	25.5713	23.2202	22.8748	23.1917	24.8145	23.1854	24.3884	23.7141	25.4578	23.1334	25.1294	24.5235	25.5474	NaN	10	NaN	1	5	3	3	9	1	1	4	7	3	3	4	10	2	8	3	11
A2NJV5	A2NJV5		IGKV A18	22.6162	NaN	NaN	NaN	22.2697	NaN	NaN	NaN	22.78	NaN	NaN	NaN	NaN	NaN	22.4959	NaN	NaN	NaN	23.6219	NaN	1	NaN	NaN	NaN	1	NaN	NaN	NaN	1	NaN	NaN	NaN	NaN	NaN	1	NaN	NaN	NaN	1	NaN
A2RRP1-2;A2RRP1	A2RRP1-2;A2RRP1	Neuroblastoma-amplified sequence	NBAS	22.6791	23.2382	23.2353	22.7933	23.1355	22.8117	22.7181	22.3335	22.0619	NaN	22.8324	23.0256	23.2315	22.5934	NaN	23.4661	NaN	22.6529	22.2932	23.8385	3	4	2	4	2	3	5	1	1	NaN	5	5	3	1	1	5	3	4	2	8
A3KMH1-3;A3KMH1;A3KMH1-2	A3KMH1-3;A3KMH1;A3KMH1-2	von Willebrand factor A domain-containing protein 8	VWA8	26.3589	NaN	24.5168	23.723	23.7978	22.8261	23.4576	NaN	NaN	23.4516	24.971	24.2729	23.6564	25.0842	23.0806	24.0991	25.308	24.179	22.6937	25.1244	13	NaN	6	2	4	2	2	NaN	1	1	7	2	2	4	1	6	6	6	1	6
A3KN83-3;A3KN83-2;A3KN83;A3KN83-4	A3KN83-3;A3KN83-2;A3KN83;A3KN83-4	Protein strawberry notch homolog 1	SBNO1	NaN	NaN	NaN	NaN	NaN	NaN	NaN	NaN	NaN	NaN	21.8012	NaN	NaN	21.7391	NaN	NaN	21.8072	22.2655	NaN	NaN	NaN	NaN	NaN	NaN	NaN	1	2	NaN	1	NaN	1	2	NaN	1	NaN	1	1	5	1	NaN
A4D161-3;A4D161-2;A4D161	A4D161-3;A4D161-2;A4D161	Protein FAM221A	FAM221A	NaN	NaN	NaN	NaN	NaN	22.7532	NaN	NaN	NaN	NaN	NaN	NaN	NaN	NaN	NaN	NaN	NaN	NaN	NaN	NaN	NaN	NaN	NaN	NaN	NaN	1	NaN	NaN	NaN	NaN	NaN	NaN	NaN	NaN	NaN	NaN	NaN	NaN	NaN	NaN
A4D1E9;A4D1E9-2	A4D1E9;A4D1E9-2	GTP-binding protein 10	GTPBP10	22.3228	NaN	22.1347	22.1393	22.994	21.8347	22.072	NaN	22.0149	NaN	22.0804	NaN	NaN	NaN	21.8496	NaN	22.6923	22.2952	NaN	22.3124	1	NaN	1	2	1	1	1	NaN	1	NaN	1	NaN	NaN	NaN	1	NaN	2	2	NaN	1
A4D1P6;A4D1P6-2;A4D1P6-3	A4D1P6;A4D1P6-2	WD repeat-containing protein 91	WDR91	22.7241	22.5265	22.9978	23.2545	23.1963	23.8542	23.6042	23.2949	24.219	NaN	NaN	23.6681	23.6112	23.2839	23.5225	23.7482	23.3822	NaN	NaN	23.1335	1	2	4	6	6	4	5	1	6	NaN	NaN	4	4	2	2	4	4	NaN	NaN	4
A4FU69-3;A4FU69;A4FU69-2;A4FU69-4;A4FU69-5	A4FU69-3;A4FU69;A4FU69-2;A4FU69-4	EF-hand calcium-binding domain-containing protein 5	EFCAB5	24.7441	NaN	23.0595	24.7744	24.1917	25.0973	24.1432	26.0622	25.3627	30.4225	24.0581	23.1124	23.4912	28.3742	24.1307	NaN	26.1043	24.506	25.7561	25.361	1	NaN	1	1	2	2	2	2	1	1	1	2	2	2	2	NaN	2	2	1	2
A5D8V6	A5D8V6	Vacuolar protein sorting-associated protein 37C	VPS37C	NaN	NaN	22.8621	20.9797	22.202	21.1349	NaN	21.5088	NaN	NaN	21.2648	NaN	22.0736	21.4091	21.9439	21.578	20.8946	NaN	NaN	21.509	NaN	NaN	2	1	1	1	NaN	2	NaN	NaN	1	NaN	1	1	2	1	1	NaN	NaN	1
A5YKK6;A5YKK6-2;A5YKK6-3	A5YKK6;A5YKK6-2;A5YKK6-3	CCR4-NOT transcription complex subunit 1	CNOT1	24.6335	24.7453	24.2585	27.2822	25.6702	25.2861	24.832	25.5741	25.0246	23.0085	25.5527	25.471	25.1969	24.3431	23.9025	25.3322	24.9666	26.3612	25.2742	24.6406	7	11	7	31	18	14	8	19	13	1	13	13	10	5	6	20	7	23	4	8
A6NDB9	A6NDB9	Paralemmin-3	PALM3	23.285	NaN	23.0832	26.4655	NaN	NaN	NaN	21.4659	NaN	NaN	NaN	NaN	NaN	NaN	NaN	NaN	NaN	21.8912	NaN	21.4612	5	NaN	3	11	NaN	NaN	NaN	1	NaN	NaN	NaN	NaN	NaN	NaN	NaN	NaN	NaN	1	NaN	1
A6NDG6	A6NDG6	Phosphoglycolate phosphatase	PGP	23.046	22.623	23.1363	22.543	23.6059	22.3917	23.1149	22.3986	23.1517	21.4985	25.794	22.2984	22.7949	22.9479	23.0504	23.194	22.4622	23.0105	21.1565	22.8723	3	3	3	2	5	1	4	4	2	1	6	1	4	3	4	4	2	4	2	3
A6NFQ2;A6NFQ2-3;A6NFQ2-2	A6NFQ2;A6NFQ2-3;A6NFQ2-2	TRPM8 channel-associated factor 2	TCAF2	NaN	NaN	NaN	NaN	NaN	NaN	NaN	NaN	NaN	NaN	24.7257	NaN	NaN	NaN	NaN	NaN	NaN	NaN	NaN	NaN	NaN	NaN	NaN	NaN	NaN	NaN	NaN	NaN	NaN	NaN	6	NaN	NaN	NaN	NaN	NaN	NaN	NaN	NaN	NaN
A6NHL2-2;A6NHL2	A6NHL2-2;A6NHL2	Tubulin alpha chain-like 3	TUBAL3	24.5206	24.6504	24.1247	24.6085	24.8355	25.3273	24.3635	25.5103	24.5906	24.8007	23.9423	24.504	24.6023	24.437	24.9268	25.0585	25.2302	25.1377	25.2918	24.957	1	1	1	1	1	1	1	1	1	1	1	1	1	1	1	1	1	1	1	1
A6NHQ2	A6NHQ2	rRNA/tRNA 2-O-methyltransferase fibrillarin-like protein 1	FBLL1	25.3617	24.9145	25.6536	24.6247	25.696	25.6215	24.2391	24.4355	26.3454	24.022	24.9232	24.9487	25.1764	25.0446	25.7082	24.5108	27.0049	25.1178	24.7357	24.9878	2	3	2	2	2	3	1	2	2	1	2	2	1	2	1	2	2	2	1	2
A6NHR9-2;A6NHR9;A6NHR9-3	A6NHR9-2;A6NHR9	Structural maintenance of chromosomes flexible hinge domain-containing protein 1	SMCHD1	23.3202	25.3874	23.9201	23.932	24.8716	24.7122	24.0531	25.0672	22.7681	NaN	23.0582	23.2191	23.1719	23.7708	23.6736	23.9654	23.4148	24.4142	23.52	23.3609	5	8	4	7	8	8	9	11	3	NaN	4	4	2	4	6	5	3	9	6	4
P14598;A6NI72;A8MVU1;P14598-2	P14598;A6NI72;A8MVU1	Neutrophil cytosol factor 1;Putative neutrophil cytosol factor 1B;Putative neutrophil cytosol factor 1C	NCF1;NCF1B;NCF1C	NaN	24.5242	NaN	NaN	24.7859	NaN	24.3836	24.6416	NaN	25.3124	NaN	22.42	25.4706	26.6779	NaN	24.6246	22.05	NaN	26.249	NaN	NaN	6	NaN	NaN	6	NaN	5	6	NaN	5	NaN	1	5	6	NaN	6	1	NaN	7	NaN
A6NIH7;Q13432-2;Q13432	A6NIH7	Protein unc-119 homolog B	UNC119B	23.7103	NaN	NaN	23.1626	23.7788	23.5847	NaN	23.0117	23.3817	NaN	23.6577	24.3848	24.1719	23.0207	23.3397	22.7615	23.1978	24.2566	NaN	24.514	1	NaN	NaN	1	1	3	NaN	2	2	NaN	3	1	1	1	1	1	1	2	NaN	1
A6NKT7;Q7Z3J3	A6NKT7;Q7Z3J3	RanBP2-like and GRIP domain-containing protein 3;RanBP2-like and GRIP domain-containing protein 4	RGPD3;RGPD4	22.9583	22.3549	22.2032	22.5107	23.821	23.3709	23.4162	22.9226	22.7786	22.8693	22.3831	22.6128	22.5792	23.0507	22.4624	25.0574	22.7196	23.273	24.0584	22.7855	1	1	1	1	1	2	1	1	1	1	1	1	1	1	1	1	1	1	1	1
A6NMB1	A6NMB1	Sialic acid-binding Ig-like lectin 16	SIGLEC16	27.7915	27.3471	26.8926	NaN	27.0947	28.2282	27.2941	28.64	28.2148	30.9757	NaN	27.3884	NaN	29.6104	27.8234	NaN	28.7622	NaN	29.5803	27.9692	1	1	1	NaN	1	1	1	1	1	1	NaN	1	NaN	1	1	NaN	1	NaN	1	1
A6NMZ7;A6NMZ7-2	A6NMZ7;A6NMZ7-2	Collagen alpha-6(VI) chain	COL6A6	24.6285	25.1953	25.4161	25.6032	25.4623	26.0684	24.5606	24.342	24.2705	23.6363	24.8497	25.9467	24.79	24.5505	25.5987	25.1816	24.0295	24.1635	24.3799	24.0921	1	1	2	1	3	2	2	1	3	1	2	2	2	2	2	1	1	1	2	1
A8CG34;Q96HA1;A6NF01;Q96HA1-2;A8CG34-2;Q96HA1-3	A8CG34;Q96HA1	Nuclear envelope pore membrane protein POM 121C;Nuclear envelope pore membrane protein POM 121	POM121C;POM121	NaN	NaN	NaN	21.184	22.103	NaN	21.7595	NaN	NaN	NaN	NaN	21.8049	21.8516	NaN	NaN	NaN	NaN	NaN	NaN	NaN	NaN	NaN	NaN	2	1	1	1	NaN	NaN	NaN	NaN	1	1	NaN	NaN	NaN	1	NaN	NaN	NaN
A8K2U0;A8K2U0-2	A8K2U0;A8K2U0-2	Alpha-2-macroglobulin-like protein 1	A2ML1	29.7437	NaN	NaN	NaN	NaN	NaN	NaN	NaN	NaN	NaN	NaN	NaN	20.8089	NaN	28.6614	NaN	20.5764	23.0042	25.6319	NaN	36	NaN	NaN	NaN	NaN	NaN	NaN	NaN	NaN	NaN	NaN	NaN	1	NaN	32	NaN	2	7	1	NaN
P62308;A8MWD9	P62308;A8MWD9	Small nuclear ribonucleoprotein G;Putative small nuclear ribonucleoprotein G-like protein 15	SNRPG;SNRPGP15	26.071	25.7583	26.1787	26.3007	25.861	25.836	25.8762	26.0987	25.9626	24.6769	26.0224	25.8314	25.6397	25.7899	25.6282	26.0137	26.5022	26.519	25.6981	25.8275	2	3	3	3	2	3	3	3	3	2	3	2	2	3	2	3	3	3	2	2
Q9NUH8-2;Q9NUH8;A8MWL7	Q9NUH8-2;Q9NUH8;A8MWL7	Transmembrane protein 14B;Transmembrane protein 14D	TMEM14B;TMEM14D	NaN	NaN	NaN	21.0514	NaN	NaN	NaN	NaN	NaN	NaN	NaN	NaN	NaN	NaN	NaN	NaN	NaN	NaN	NaN	NaN	NaN	NaN	NaN	1	NaN	NaN	NaN	NaN	NaN	NaN	NaN	NaN	NaN	NaN	NaN	NaN	NaN	NaN	NaN	NaN
B0I1T2;B0I1T2-4;B0I1T2-3	B0I1T2;B0I1T2-4	Unconventional myosin-Ig;Minor histocompatibility antigen HA-2	MYO1G	NaN	25.2259	NaN	24.4061	24.7179	NaN	26.1729	NaN	24.8431	23.7735	NaN	24.9723	24.4968	25.3311	25.0506	NaN	25.1552	NaN	25.3744	NaN	NaN	3	NaN	1	3	NaN	11	NaN	1	2	NaN	1	3	4	4	NaN	1	NaN	2	NaN
B1AK53;B1AK53-2	B1AK53;B1AK53-2	Espin	ESPN	NaN	NaN	NaN	22.9749	NaN	NaN	NaN	NaN	NaN	NaN	NaN	NaN	NaN	NaN	NaN	NaN	NaN	22.9933	NaN	NaN	NaN	NaN	NaN	2	1	NaN	NaN	1	NaN	NaN	1	1	NaN	NaN	NaN	NaN	2	3	NaN	NaN
B7ZAP0;Q5R372-7;Q5R372-8;Q5R372-6;Q5R372-5	B7ZAP0;Q5R372-7;Q5R372-8;Q5R372-6;Q5R372-5	Rab GTPase-activating protein 1-like, isoform 10;Rab GTPase-activating protein 1-like	RABGAP1L	NaN	NaN	NaN	20.5503	NaN	19.6079	NaN	NaN	NaN	NaN	NaN	19.6063	NaN	19.7766	20.366	19.4465	19.2067	NaN	NaN	NaN	1	NaN	1	1	NaN	1	NaN	1	1	NaN	NaN	1	1	1	1	1	1	1	NaN	NaN
B7ZAQ6-2;B7ZAQ6-3;P0CG08;B7ZAQ6	B7ZAQ6-2;B7ZAQ6-3;P0CG08;B7ZAQ6	Golgi pH regulator A;Golgi pH regulator B	GPR89A;GPR89B	23.8524	23.646	23.4383	23.4307	23.6873	23.7883	23.5429	23.586	23.2241	NaN	23.1157	23.9338	23.1778	23.4077	23.3491	24.4914	23.4372	23.6017	24.0095	24.0379	4	3	1	4	4	3	3	4	2	NaN	2	4	4	2	2	5	3	2	1	5
B9A064;P0CG04	B9A064;P0CG04	Immunoglobulin lambda-like polypeptide 5;Ig lambda-1 chain C regions	IGLL5;IGLC1	31.1972	31.7661	31.0011	30.5818	31.498	31.3061	31.7895	31.2255	31.662	33.428	31.7542	30.9337	32.0571	31.966	31.0462	31.0569	32.1092	30.1859	33.1232	31.515	6	6	7	6	7	7	7	7	7	8	7	6	7	7	5	6	7	5	7	6
C4AMC7;Q6VEQ5;A8K0Z3;A8MWX3	C4AMC7;Q6VEQ5;A8K0Z3;A8MWX3	Putative WAS protein family homolog 3;WAS protein family homolog 2;WAS protein family homolog 1;Putative WAS protein family homolog 4	WASH3P;WASH2P;WASH1;WASH4P	22.9672	23.2344	22.0003	22.9001	22.8655	23.2743	23.4589	23.3885	22.447	NaN	23.024	23.0114	23.6193	23.2196	NaN	23.2731	NaN	23.5082	23.0097	23.0971	3	4	1	4	2	2	3	2	3	NaN	2	3	5	3	NaN	5	NaN	4	4	4
C9JLW8	C9JLW8	Protein FAM195B	FAM195B	NaN	22.8863	22.9908	23.5652	22.6126	22.7309	NaN	23.2015	23.1084	NaN	22.8132	NaN	22.6297	23.1045	22.9073	22.7965	NaN	23.0265	NaN	NaN	NaN	2	1	2	2	1	NaN	2	2	NaN	1	NaN	1	1	1	2	NaN	3	NaN	NaN
CON__ENSEMBL:ENSBTAP00000031900	CON__ENSEMBL:ENSBTAP00000031900			25.6609	25.3209	25.3142	25.8038	26.4359	25.6406	25.6428	24.9887	NaN	26.959	23.5695	25.7315	25.9202	26.8153	26.5756	NaN	26.6788	NaN	26.0585	25.6071	1	1	1	1	1	1	1	1	NaN	1	1	1	1	1	1	NaN	1	NaN	1	1
CON__O43790;O43790;CON__Q14533;Q14533;CON__P78385;A6NCN2	CON__O43790;O43790;CON__Q14533;Q14533;CON__P78385	Keratin, type II cuticular Hb6;Keratin, type II cuticular Hb1	KRT86;KRT81	NaN	NaN	NaN	22.6135	NaN	NaN	NaN	NaN	21.3977	20.6191	20.7387	26.4067	NaN	20.1279	NaN	22.4756	19.1511	29.1892	NaN	22.3526	NaN	NaN	1	4	NaN	NaN	NaN	NaN	1	2	1	15	NaN	1	NaN	3	1	23	NaN	2
CON__O76013;O76013-2;O76013	CON__O76013;O76013-2;O76013	Keratin, type I cuticular Ha6	KRT36	NaN	NaN	NaN	NaN	NaN	NaN	NaN	NaN	NaN	NaN	NaN	NaN	NaN	NaN	NaN	NaN	NaN	22.5103	NaN	NaN	NaN	NaN	NaN	NaN	NaN	NaN	NaN	NaN	NaN	NaN	NaN	NaN	NaN	NaN	NaN	NaN	NaN	2	NaN	NaN
CON__O76015;O76015	CON__O76015;O76015	Keratin, type I cuticular Ha8	KRT38	NaN	25.4923	21.7595	NaN	25.2999	NaN	25.1797	NaN	NaN	NaN	28.1278	25.7595	NaN	NaN	25.7656	NaN	NaN	26.6988	NaN	NaN	NaN	1	1	NaN	1	NaN	1	NaN	NaN	NaN	1	1	NaN	NaN	1	NaN	NaN	1	NaN	NaN
CON__O95678;O95678;CON__Q8N1N4-2;CON__Q7RTT2;Q8N1N4-2;Q8N1N4	CON__O95678;O95678	Keratin, type II cytoskeletal 75	KRT75	NaN	NaN	NaN	NaN	NaN	NaN	NaN	NaN	NaN	NaN	NaN	24.3112	NaN	NaN	NaN	NaN	25.6584	24.4015	NaN	NaN	NaN	NaN	NaN	NaN	NaN	NaN	NaN	NaN	NaN	NaN	NaN	1	NaN	NaN	NaN	NaN	1	2	NaN	NaN
CON__P00761	CON__P00761			29.1604	29.2137	29.2436	29.5664	29.3918	29.5608	29.2188	29.5108	29.7794	31.1821	29.5441	29.5726	29.4387	29.5552	29.6422	29.2125	30.2443	29.4431	31.0669	29.3762	4	4	4	4	4	4	4	4	4	5	4	4	4	4	4	4	4	4	4	4
CON__P01966	CON__P01966			30.4298	30.2639	29.0644	30.2372	30.2485	30.5361	30.2619	30.5285	30.9466	31.8451	30.1116	30.1167	29.7321	30.5545	29.3963	29.7289	30.4784	30.6219	31.4663	29.9995	1	1	1	1	1	2	1	1	2	1	1	1	1	1	1	2	1	1	1	2
CON__P02533;P02533;CON__Q61782;CON__Q9D312	CON__P02533;P02533	Keratin, type I cytoskeletal 14	KRT14	NaN	22.1573	NaN	21.9321	NaN	NaN	24.0614	NaN	23.5275	24.4246	NaN	22.4641	NaN	NaN	NaN	22.6343	23.1623	24.5452	NaN	NaN	NaN	1	NaN	1	NaN	NaN	4	NaN	2	2	NaN	2	NaN	NaN	NaN	2	1	4	NaN	NaN
CON__P02538;P02538;CON__P04259;P04259	CON__P02538;P02538;CON__P04259;P04259	Keratin, type II cytoskeletal 6A;Keratin, type II cytoskeletal 6B	KRT6A;KRT6B	26.1058	26.0703	NaN	23.7414	24.8441	24.8025	23.0725	22.6515	24.744	26.5615	30.2548	27.8213	27.0647	20.8703	29.6844	26.0932	24.2373	31.6285	24.604	29.2343	14	7	NaN	3	3	3	2	5	4	8	22	18	13	2	19	11	3	21	2	20
CON__P02768-1;P02768;P02768-3;P02768-2	CON__P02768-1;P02768;P02768-3;P02768-2	Serum albumin	ALB	35.9245	35.7067	36.1843	35.1641	36.0274	35.9129	34.5849	35.7285	36.2331	37.6532	35.8334	36.1139	36.1799	36.3954	36.0492	35.5807	36.7923	35.4043	36.7426	35.814	50	53	55	49	53	50	49	48	52	50	52	55	53	53	54	51	52	50	51	50
CON__P02769	CON__P02769			26.2616	26.684	25.4195	25.5168	23.8742	26.1982	23.0054	26.6224	25.7803	29.7253	23.6	24.5859	25.4735	27.4893	25.7521	23.7145	29.0387	26.7357	25.0967	26.8915	3	2	1	2	3	6	2	2	2	3	4	3	5	3	5	3	5	4	2	3
CON__P05784	CON__P05784			23.1502	22.513	NaN	NaN	NaN	NaN	23.0488	22.9312	NaN	25.5024	25.5574	22.659	23.693	NaN	23.691	23.0395	24.6244	22.5633	24.8646	25.0325	2	2	NaN	NaN	NaN	NaN	2	1	NaN	1	1	1	2	NaN	1	1	2	1	1	2
CON__P05787;P05787;P05787-2;CON__Q9H552;CON__H-INV:HIT000016045	CON__P05787;P05787;P05787-2	Keratin, type II cytoskeletal 8	KRT8	33.3344	32.4972	32.6814	31.8886	31.8758	32.2101	32.4744	33.6006	29.3916	30.5096	35.0737	32.7844	33.034	32.2952	32.444	32.4131	33.8412	33.2382	31.6064	33.3779	34	35	33	31	34	32	33	34	25	23	39	34	33	33	29	32	34	34	27	33
CON__P07477;P07477;Q8NHM4;P07478	CON__P07477;P07477;Q8NHM4;P07478	Trypsin-1;Alpha-trypsin chain 1;Alpha-trypsin chain 2;Putative trypsin-6;Trypsin-2	PRSS1;PRSS3P2;PRSS2	23.6896	24.541	23.4868	23.5345	23.8643	24.4786	23.6087	24.1035	23.9004	23.6686	23.8377	24.1826	23.8645	24.1686	23.5573	24.0714	23.5543	23.7327	23.7457	23.4775	1	1	1	1	1	1	2	1	1	1	1	1	1	1	1	1	1	1	1	1
CON__P08727;CON__Q8N1A0;Q8N1A0-2;Q8N1A0	CON__P08727			33.5533	31.4788	32.3107	31.7541	31.3135	31.5093	31.5748	33.1053	29.9858	30.3172	34.4985	31.466	31.759	31.4806	32.0796	31.1141	33.101	32.5572	31.3318	32.3204	35	29	32	34	31	27	30	36	26	23	37	29	30	29	29	29	31	32	25	31
CON__P08729;Q86Y46-2	CON__P08729			24.5109	22.2102	22.722	23.0656	22.7004	23.4651	22.018	24.9562	20.8818	23.1294	NaN	22.171	23.2473	20.0568	25.1208	20.7218	24.2508	21.2279	24.0616	20.8279	2	2	2	2	1	2	2	2	1	1	NaN	1	2	1	2	1	2	2	1	1
CON__P08730-1	CON__P08730-1			NaN	26.7823	NaN	NaN	NaN	NaN	NaN	NaN	NaN	NaN	NaN	26.7378	NaN	NaN	NaN	NaN	NaN	NaN	NaN	NaN	NaN	1	NaN	NaN	NaN	NaN	NaN	NaN	NaN	NaN	NaN	1	NaN	NaN	NaN	NaN	NaN	NaN	NaN	NaN
CON__P08779;P08779;CON__Q9Z2K1;CON__Q3ZAW8	CON__P08779;P08779	Keratin, type I cytoskeletal 16	KRT16	NaN	25.0045	NaN	24.4871	22.7717	24.1015	24.5889	23.0184	23.0119	24.5334	21.9173	25.3542	22.3822	21.9197	27.4507	23.3163	NaN	30.384	22.286	25.2597	NaN	2	NaN	2	1	1	5	3	2	2	1	12	2	1	14	2	NaN	19	1	12
CON__P13645;P13645;CON__P02535-1;CON__Q2M2I5;Q2M2I5	CON__P13645;P13645	Keratin, type I cytoskeletal 10	KRT10	27.3937	29.2081	26.3823	27.7318	27.563	27.6194	26.4296	25.995	30.9209	31.1781	27.9289	27.1891	26.8008	27.7768	26.9175	28.1405	27.5873	27.0513	28.7274	26.3995	18	20	12	18	16	14	9	7	26	23	18	13	11	14	10	18	13	14	16	11
CON__P13647;P13647	CON__P13647;P13647	Keratin, type II cytoskeletal 5	KRT5	19.5797	25.9733	NaN	23.4713	26.1176	26.5634	21.8655	NaN	26.273	26.6814	29.5556	28.3615	28.6726	NaN	28.0738	23.865	23.5953	30.5338	21.3233	27.8365	1	12	NaN	5	12	11	3	NaN	8	9	15	15	15	NaN	16	4	7	18	1	12
CON__P15636	CON__P15636			27.8814	27.451	27.9492	27.9042	27.2565	27.8733	27.456	28.2323	28.1512	31.0611	27.8349	27.6237	27.7641	28.0909	27.6831	27.6614	29.7256	27.5677	30.4839	27.7007	8	7	8	7	8	8	8	8	7	8	8	8	8	8	8	7	8	7	9	8
CON__P19012;P19012;P19012-2	CON__P19012;P19012;P19012-2	Keratin, type I cytoskeletal 15	KRT15	NaN	NaN	NaN	25.2241	NaN	NaN	NaN	NaN	NaN	NaN	NaN	NaN	NaN	NaN	NaN	NaN	NaN	NaN	NaN	NaN	NaN	NaN	NaN	6	NaN	NaN	NaN	NaN	NaN	NaN	NaN	NaN	NaN	NaN	NaN	NaN	NaN	NaN	NaN	NaN
CON__P19013;P19013	CON__P19013;P19013	Keratin, type II cytoskeletal 4	KRT4	NaN	NaN	NaN	NaN	NaN	NaN	NaN	NaN	NaN	23.6137	NaN	NaN	NaN	NaN	NaN	NaN	NaN	NaN	NaN	NaN	NaN	NaN	NaN	NaN	NaN	NaN	NaN	NaN	NaN	2	NaN	NaN	NaN	NaN	NaN	NaN	NaN	NaN	NaN	NaN
CON__P35908	CON__P35908			NaN	NaN	NaN	NaN	NaN	NaN	NaN	NaN	23.18	NaN	NaN	NaN	NaN	NaN	NaN	NaN	NaN	NaN	NaN	NaN	NaN	NaN	NaN	NaN	NaN	NaN	NaN	NaN	1	NaN	NaN	NaN	NaN	NaN	NaN	NaN	NaN	NaN	NaN	NaN
CON__P41361	CON__P41361			NaN	23.2781	NaN	22.7612	24.8384	25.7828	NaN	NaN	NaN	NaN	NaN	NaN	NaN	NaN	24.1303	NaN	NaN	24.8231	NaN	24.2335	NaN	1	NaN	1	1	1	NaN	NaN	NaN	NaN	NaN	NaN	NaN	NaN	1	NaN	NaN	1	NaN	1
CON__P67983;P04732;Q93083;P07438;P04733	CON__P67983;P04732;Q93083;P07438;P04733	Metallothionein-1E;Metallothionein-1L;Metallothionein-1B;Metallothionein-1F	MT1E;MT1L;MT1B;MT1F	NaN	18.4413	17.1461	21.6695	18.16	NaN	17.8209	19.1999	NaN	NaN	NaN	NaN	NaN	NaN	NaN	NaN	NaN	NaN	NaN	NaN	NaN	1	1	1	1	NaN	1	1	NaN	NaN	NaN	NaN	NaN	NaN	NaN	NaN	NaN	NaN	NaN	NaN
CON__P78386;P78386	CON__P78386;P78386	Keratin, type II cuticular Hb5	KRT85	28.2823	NaN	NaN	NaN	NaN	26.5918	NaN	28.0924	NaN	NaN	NaN	NaN	NaN	NaN	NaN	NaN	NaN	NaN	NaN	25.6984	1	NaN	NaN	NaN	NaN	1	NaN	1	NaN	NaN	NaN	NaN	NaN	NaN	NaN	NaN	NaN	2	NaN	1
CON__Q04695;Q04695	CON__Q04695;Q04695	Keratin, type I cytoskeletal 17	KRT17	24.1847	28.2877	24.635	24.6394	25.3068	27.8196	25.7506	25.8216	22.7736	28.2722	23.7297	24.6654	22.6832	NaN	25.1997	23.5386	23.5204	29.9549	24.249	24.4931	5	13	6	7	4	12	6	9	2	12	4	5	3	NaN	8	2	4	15	3	4
CON__Q14525;Q14525	CON__Q14525;Q14525	Keratin, type I cuticular Ha3-II	KRT33B	NaN	NaN	NaN	25.2347	NaN	NaN	NaN	NaN	NaN	NaN	NaN	25.9682	NaN	NaN	NaN	25.8359	NaN	27.7163	NaN	25.4086	NaN	NaN	NaN	1	NaN	NaN	NaN	NaN	NaN	NaN	NaN	10	NaN	NaN	NaN	5	NaN	18	NaN	1
CON__Q9UE12;CON__Q15323;Q15323;CON__A2A5Y0	CON__Q9UE12;CON__Q15323;Q15323;CON__A2A5Y0	Keratin, type I cuticular Ha1	KRT31	NaN	NaN	NaN	NaN	NaN	NaN	NaN	NaN	NaN	NaN	NaN	24.863	NaN	NaN	NaN	23.8675	NaN	26.5322	NaN	NaN	NaN	NaN	NaN	NaN	NaN	NaN	NaN	NaN	NaN	NaN	NaN	4	NaN	NaN	NaN	3	NaN	5	NaN	NaN
CON__Q28085	CON__Q28085			24.3981	NaN	24.8831	NaN	NaN	NaN	NaN	NaN	NaN	26.0587	NaN	NaN	NaN	NaN	NaN	25.2164	NaN	NaN	NaN	24.5142	1	NaN	1	NaN	NaN	NaN	NaN	NaN	NaN	1	NaN	NaN	NaN	NaN	NaN	1	NaN	NaN	NaN	1
CON__Q28107	CON__Q28107			22.4403	22.0457	25.7004	22.4824	NaN	NaN	NaN	NaN	22.1134	NaN	21.9986	22.8353	23.5778	22.3865	NaN	22.267	21.6401	21.9681	NaN	22.6537	1	1	1	1	NaN	NaN	NaN	NaN	1	1	1	1	1	1	NaN	1	1	1	NaN	1
CON__Q2UVX4	CON__Q2UVX4			26.4204	26.0899	NaN	NaN	19.9442	20.2846	NaN	NaN	20.0922	23.7165	19.471	NaN	20.0927	NaN	NaN	20.3579	NaN	NaN	NaN	19.604	1	1	NaN	NaN	1	1	NaN	NaN	1	1	1	NaN	1	NaN	NaN	1	NaN	NaN	NaN	1
CON__Q32PJ2	CON__Q32PJ2			NaN	NaN	NaN	NaN	NaN	NaN	NaN	NaN	NaN	NaN	24.2049	NaN	NaN	NaN	NaN	NaN	NaN	NaN	NaN	NaN	NaN	NaN	NaN	NaN	NaN	NaN	NaN	NaN	NaN	NaN	1	NaN	NaN	NaN	NaN	NaN	NaN	NaN	NaN	NaN
CON__Q3KNV1;P08729	CON__Q3KNV1;P08729	Keratin, type II cytoskeletal 7	KRT7	32.5996	30.3571	31.2017	31.0036	29.9901	30.5808	29.8689	32.0379	28.7434	29.6271	28.3499	30.4718	30.1431	27.0399	31.8661	28.1986	31.2212	30.4054	30.1979	29.6457	29	26	26	26	24	22	24	27	23	20	22	25	24	17	27	21	24	27	23	24
CON__Q3SX28	CON__Q3SX28			NaN	NaN	NaN	22.334	NaN	NaN	NaN	NaN	NaN	21.4154	NaN	NaN	NaN	NaN	NaN	21.5916	NaN	NaN	NaN	NaN	NaN	1	NaN	1	NaN	NaN	NaN	NaN	NaN	1	NaN	NaN	NaN	NaN	NaN	1	NaN	NaN	NaN	NaN
CON__Q3ZBD7	CON__Q3ZBD7			22.7475	24.6797	26.2447	23.8382	NaN	24.792	NaN	24.2444	NaN	23.3657	24.072	NaN	23.3109	23.8961	23.6948	25.2918	23.9514	25.3688	22.9608	23.3492	2	1	2	1	NaN	2	NaN	1	NaN	1	1	NaN	2	1	2	2	1	1	1	1
CON__Q5D862;Q5D862	CON__Q5D862;Q5D862	Filaggrin-2	FLG2	17.5237	NaN	NaN	NaN	17.6507	NaN	NaN	NaN	21.3984	19.9996	18.8192	NaN	NaN	NaN	NaN	18.6924	18.3583	NaN	NaN	NaN	1	NaN	NaN	NaN	1	NaN	NaN	NaN	1	1	1	NaN	NaN	NaN	NaN	1	1	NaN	NaN	NaN
CON__Q9NSB2;CON__Q6ISB0;Q9NSB2	CON__Q9NSB2;CON__Q6ISB0;Q9NSB2	Keratin, type II cuticular Hb4	KRT84	NaN	NaN	19.6981	NaN	28.0722	20.001	NaN	NaN	22.5602	21.5779	NaN	NaN	NaN	NaN	NaN	NaN	NaN	20.5476	27.1816	NaN	NaN	NaN	1	NaN	1	1	NaN	NaN	1	1	NaN	NaN	NaN	NaN	NaN	NaN	NaN	1	1	NaN
CON__Q6KB66-1;Q6KB66-2;Q6KB66;Q6KB66-3	CON__Q6KB66-1;Q6KB66-2;Q6KB66;Q6KB66-3	Keratin, type II cytoskeletal 80	KRT80	NaN	22.4892	NaN	NaN	NaN	NaN	NaN	22.8731	NaN	23.2747	24.2561	NaN	NaN	NaN	24.7351	NaN	NaN	24.0064	NaN	NaN	NaN	1	NaN	NaN	NaN	NaN	NaN	3	NaN	1	7	NaN	NaN	NaN	7	NaN	NaN	7	NaN	NaN
CON__Q7Z3Z0;CON__Q7Z3Y8;Q7Z3Z0;Q7Z3Y8	CON__Q7Z3Z0;CON__Q7Z3Y8;Q7Z3Z0;Q7Z3Y8	Keratin, type I cytoskeletal 25;Keratin, type I cytoskeletal 27	KRT25;KRT27	21.0924	NaN	21.0821	NaN	NaN	NaN	21.2169	NaN	NaN	NaN	NaN	NaN	NaN	NaN	NaN	NaN	NaN	NaN	NaN	NaN	1	NaN	1	NaN	NaN	NaN	1	NaN	NaN	NaN	NaN	NaN	NaN	NaN	1	NaN	NaN	1	NaN	NaN
CON__Q86YZ3;Q86YZ3	CON__Q86YZ3;Q86YZ3	Hornerin	HRNR	NaN	NaN	NaN	NaN	NaN	NaN	NaN	NaN	18.82	20.2967	NaN	NaN	NaN	NaN	NaN	20.121	NaN	NaN	20.1277	NaN	NaN	NaN	NaN	NaN	NaN	NaN	NaN	NaN	1	1	NaN	NaN	NaN	NaN	NaN	1	NaN	NaN	1	NaN
CON__Q8VED5	CON__Q8VED5			21.2349	27.6838	20.7788	NaN	27.1939	25.6265	20.3644	NaN	25.9477	NaN	NaN	28.3782	28.1615	NaN	20.6004	20.7562	20.9423	28.7588	NaN	28.6321	1	1	1	NaN	1	1	1	NaN	1	NaN	1	1	1	NaN	2	1	1	1	NaN	1
CON__Q9BYR8;Q9BYR8	CON__Q9BYR8;Q9BYR8	Keratin-associated protein 3-1	KRTAP3-1	NaN	NaN	NaN	NaN	NaN	NaN	NaN	NaN	NaN	NaN	NaN	NaN	NaN	NaN	NaN	NaN	NaN	22.0155	NaN	NaN	NaN	NaN	NaN	NaN	NaN	NaN	NaN	NaN	NaN	NaN	NaN	NaN	NaN	NaN	NaN	NaN	NaN	1	NaN	NaN
CON__Q9C075;Q9C075;Q9C075-2;CON__Q99PS0	CON__Q9C075;Q9C075;Q9C075-2	Keratin, type I cytoskeletal 23	KRT23	22.5589	21.8676	23.3541	22.7553	NaN	22.3965	NaN	26.5285	21.1636	22.5508	30.1052	26.5815	25.8442	19.0223	27.7155	25.5205	NaN	27.1075	23.803	26.1298	4	4	5	5	NaN	2	NaN	15	1	1	21	16	14	1	18	10	NaN	17	3	15
Q13765;E9PAV3-2;E9PAV3;Q9BZK3	Q13765;E9PAV3-2;E9PAV3	Nascent polypeptide-associated complex subunit alpha;Nascent polypeptide-associated complex subunit alpha, muscle-specific form	NACA	27.3477	26.9682	27.0694	27.342	27.0015	27.0731	26.9492	27.2197	27.3412	25.6334	26.7847	26.877	26.9878	26.9053	27.1156	27.4807	27.1387	27.8051	27.0546	27.2753	5	5	5	5	5	4	5	5	4	4	5	5	5	4	3	5	4	5	5	5
H7BZ55;REV__P36956-3;REV__P36956-2;REV__P36956;REV__P36956-4;Q9NZ72-2;Q9NZ72	H7BZ55	Putative ciliary rootlet coiled-coil protein-like 3 protein		20.0684	20.4019	22.0359	25.4376	19.5032	21.3468	20.5225	22.1422	19.583	NaN	22.5489	20.7265	20.8661	20.8818	NaN	20.0738	20.1974	23.1098	19.7115	19.9398	2	3	1	1	1	2	2	1	1	NaN	1	2	3	3	NaN	2	3	14	1	2
K7EJ46-3;K7EJ46-2;K7EJ46	K7EJ46-3;K7EJ46-2;K7EJ46	Small integral membrane protein 22	SMIM22	23.1974	NaN	22.5222	20.9906	NaN	NaN	NaN	22.1312	NaN	NaN	24.5874	NaN	22.5211	22.4227	NaN	NaN	21.0982	NaN	NaN	22.4422	1	NaN	1	1	NaN	NaN	NaN	1	NaN	NaN	1	NaN	1	1	NaN	NaN	1	NaN	NaN	1
L0R6Q1	L0R6Q1		SLC35A4	25.1853	23.8548	24.6691	23.9022	23.8568	23.6782	25.0279	24.2218	23.8468	NaN	24.0941	24.1845	24.3382	24.2745	24.329	24.2362	24.4906	23.9269	24.5912	24.4413	4	2	4	4	3	2	4	4	4	NaN	4	1	4	3	4	3	3	3	1	4
O00115-2;O00115	O00115-2;O00115	Deoxyribonuclease-2-alpha	DNASE2	24.9283	24.4818	25.152	27.2305	25.5049	24.1443	24.4301	24.4953	24.6568	NaN	24.209	24.3251	24.5908	24.642	25.409	24.8005	25.351	25.5983	24.7024	24.1897	3	2	4	5	4	1	5	4	2	NaN	2	4	4	3	3	4	4	5	5	2
O00116	O00116	Alkyldihydroxyacetonephosphate synthase, peroxisomal	AGPS	25.4972	25.8837	26.1909	27.0401	24.7578	24.5944	25.3299	26.2444	26.6877	NaN	25.9271	26.2541	25.8216	27.0195	25.664	26.3625	25.4916	25.8378	26.1864	26.3543	10	8	14	16	6	3	7	12	12	NaN	11	12	10	13	9	12	4	10	7	11
O00139-2;O00139-1;O00139-5;O00139;O00139-4	O00139-2;O00139-1;O00139-5;O00139;O00139-4	Kinesin-like protein KIF2A	KIF2A	23.261	23.4487	23.3458	22.8085	23.066	NaN	22.2546	24.216	NaN	NaN	23.2213	24.2027	23.8695	23.7763	24.0667	25.4843	23.5686	24.0152	24.3628	24.1875	6	4	5	3	5	1	1	6	2	NaN	1	6	5	5	9	9	5	7	2	6
O00148;O00148-2;O00148-3	O00148;O00148-2;O00148-3	ATP-dependent RNA helicase DDX39A	DDX39A	25.5885	25.9317	23.7482	27.2396	26.5178	26.09	25.6836	26.5564	26.15	24.8999	24.7597	24.8149	24.8922	24.4883	25.5385	26.0837	25.1583	26.1835	23.9875	24.5198	6	6	2	6	6	5	6	6	6	4	5	5	5	4	6	6	4	6	3	3
O00151	O00151	PDZ and LIM domain protein 1	PDLIM1	27.0899	28.1269	27.8894	28.6075	27.9119	27.2737	28.9071	28.1107	27.5588	27.9378	28.5098	28.3386	28.0481	28.0742	28.1288	26.9891	27.9595	28.7474	28.3523	27.4041	13	15	12	13	14	12	14	13	9	9	14	13	13	13	13	11	12	14	12	12
O00154-6;O00154-4;O00154-7;O00154;O00154-5;O00154-2;O00154-3	O00154-6;O00154-4;O00154-7;O00154;O00154-5;O00154-2;O00154-3	Cytosolic acyl coenzyme A thioester hydrolase	ACOT7	23.5913	24.4294	23.3083	25.446	23.1091	23.5403	23.9935	24.8624	24.23	NaN	26.6087	23.3127	23.525	22.7328	23.9664	24.6695	23.4433	25.3034	23.1754	22.854	1	4	4	5	2	1	4	6	4	NaN	8	2	3	2	5	6	1	8	2	1
O00159-3;O00159	O00159-3;O00159	Unconventional myosin-Ic	MYO1C	27.7705	28.6661	27.7472	29.7118	28.6854	28.5263	28.4194	27.6757	28.6561	27.9905	27.7419	28.5455	28.5192	28.2315	28.2267	27.8144	28.0789	27.6122	28.0094	28.1961	28	35	23	39	32	29	32	27	29	19	25	30	29	27	32	28	27	27	19	28
O00160	O00160	Unconventional myosin-If	MYO1F	23.1897	25.1639	NaN	22.7232	25.7879	22.7797	25.0508	25.6178	24.9117	25.631	23.2243	25.3691	25.8305	27.1059	24.3966	25.5065	23.7536	24.5587	26.4221	24.8283	3	9	NaN	3	9	1	7	10	3	9	2	7	11	19	3	8	2	2	12	5
O00161;O00161-2	O00161;O00161-2	Synaptosomal-associated protein 23	SNAP23	25.4854	25.2591	25.6415	24.9734	25.3103	25.2581	25.576	25.3453	25.6803	24.1791	25.2452	25.0767	25.3874	25.3442	24.9509	25.7042	25.4604	24.6621	24.9779	25.4658	4	6	6	5	5	5	6	5	6	2	4	4	6	6	5	6	4	3	5	6
O00170	O00170	AH receptor-interacting protein	AIP	25.6223	25.6975	25.5445	25.8776	25.6797	25.5234	25.6348	26.1038	25.3092	24.1072	24.775	25.5498	25.6271	24.3873	25.4165	25.4302	25.519	24.8348	25.5016	25.3169	7	7	6	6	8	7	7	7	7	1	5	6	7	5	8	7	6	7	7	6
O00178	O00178	GTP-binding protein 1	GTPBP1	22.9698	22.977	NaN	22.5553	22.9518	22.851	23.2926	22.7096	22.8407	NaN	22.8653	22.8915	22.7656	22.6591	22.8836	23.1234	NaN	22.9983	22.9632	22.5956	2	2	NaN	3	2	2	4	3	1	NaN	2	3	3	2	2	3	NaN	2	1	2
O00182-3;O00182-2;O00182-6;O00182;O00182-5;O00182-4	O00182-3;O00182-2;O00182-6;O00182	Galectin-9	LGALS9	25.9061	25.9131	25.2531	25.6533	26.5164	25.6609	25.7028	26.1407	24.821	25.4899	25.4218	25.2916	26.301	25.7501	24.7675	26.6964	22.5127	24.5678	26.1603	24.6147	5	6	5	7	5	4	4	6	5	5	4	5	5	3	5	6	1	4	5	3
O00186	O00186	Syntaxin-binding protein 3	STXBP3	25.6385	24.4674	25.3845	24.7997	24.5972	24.6824	25.4168	24.2779	24.916	23.4815	25.2099	25.0597	25.4355	24.9238	24.8933	24.8735	22.477	24.3357	24.7658	24.9065	11	7	7	10	8	4	10	6	5	1	9	9	9	8	7	9	1	6	2	11
O00192-2;O00192	O00192-2;O00192	Armadillo repeat protein deleted in velo-cardio-facial syndrome	ARVCF	NaN	NaN	24.5271	NaN	NaN	NaN	NaN	NaN	NaN	NaN	NaN	22.3168	NaN	NaN	NaN	NaN	NaN	22.6982	NaN	NaN	NaN	NaN	4	NaN	NaN	NaN	NaN	NaN	NaN	NaN	NaN	1	NaN	NaN	NaN	NaN	NaN	2	NaN	NaN
O00193	O00193	Small acidic protein	SMAP	23.4192	24.7633	24.4322	25.0078	24.3248	24.9494	24.8796	25.265	24.892	NaN	24.6459	24.9201	23.9814	24.7889	24.898	25.2081	25.7199	25.1683	24.5037	25.4793	1	2	2	2	3	2	2	3	3	NaN	3	1	2	3	3	3	4	3	4	3
O00194	O00194	Ras-related protein Rab-27B	RAB27B	24.1939	NaN	NaN	22.0932	22.802	NaN	23.0967	24.1585	22.5304	23.3117	21.1017	22.5973	23.7589	25.374	22.8455	24.1843	22.6766	21.9922	23.6596	23.3361	6	NaN	NaN	4	1	NaN	3	5	1	2	1	3	4	2	2	6	1	2	3	5
O00203-3;O00203	O00203-3;O00203	AP-3 complex subunit beta-1	AP3B1	26.4947	26.3483	25.7836	24.8385	26.0425	25.7019	26.4876	26.0654	26.1959	25.1111	26.4406	26.1551	26.4725	26.2458	26.3722	26.9428	25.8538	26.2325	25.9845	26.8924	16	17	11	6	14	9	15	17	16	5	18	15	20	13	14	17	12	14	9	16
O00204-2;O00204	O00204-2;O00204	Sulfotransferase family cytosolic 2B member 1	SULT2B1	NaN	NaN	NaN	NaN	NaN	NaN	NaN	NaN	NaN	NaN	24.3702	NaN	NaN	23.1401	23.0401	23.274	22.9806	NaN	NaN	22.7451	NaN	NaN	NaN	NaN	NaN	1	1	NaN	NaN	NaN	3	NaN	NaN	2	2	2	2	NaN	NaN	1
O00217	O00217	NADH dehydrogenase [ubiquinone] iron-sulfur protein 8, mitochondrial	NDUFS8	26.6047	25.7339	26.1291	26.2339	25.2939	25.3235	25.3457	26.1291	25.3775	23.8371	25.5033	25.2193	25.8113	25.2329	25.3971	25.8192	26.3545	25.6762	25.2107	25.7722	6	5	6	6	4	5	5	6	5	1	5	5	6	5	5	6	5	6	3	6
O00231;O00231-2	O00231;O00231-2	26S proteasome non-ATPase regulatory subunit 11	PSMD11	27.4763	27.5767	27.4383	27.9196	27.7958	27.7691	27.4786	27.7568	27.7988	26.9741	27.7346	27.7923	27.7054	27.6901	27.8154	28.0206	27.6193	28.0062	27.383	27.647	18	16	16	19	17	18	16	16	19	6	17	18	18	17	18	19	16	17	15	16
O00232;O00232-2	O00232;O00232-2	26S proteasome non-ATPase regulatory subunit 12	PSMD12	27.1469	27.1289	26.9401	27.1181	27.191	27.2555	26.8741	27.3036	27.2532	26.491	27.1479	27.0734	26.9663	27.0085	27.1905	27.5248	26.8601	27.5101	26.8454	27.1276	15	16	16	15	15	16	14	18	13	9	18	16	14	12	16	17	11	16	14	14
O00233;O00233-2;O00233-3	O00233;O00233-2	26S proteasome non-ATPase regulatory subunit 9	PSMD9	25.4768	25.7846	24.7532	25.5757	25.8459	25.7993	25.5575	25.7457	25.5133	25.1519	26.5865	25.8906	25.7386	25.0975	24.815	25.4218	25.6118	26.3072	25.9334	25.6052	6	6	2	6	7	6	5	5	5	5	7	7	5	4	4	6	5	7	6	6
O00244	O00244	Copper transport protein ATOX1	ATOX1	26.2437	25.7712	25.497	25.6491	25.907	25.7787	25.9514	26.1981	26.065	25.3565	27.1289	25.4602	25.7753	25.1847	25.2255	26.158	25.2725	25.3654	26.6183	25.3158	4	3	3	3	2	1	3	3	2	1	4	4	2	2	1	3	3	1	2	4
O00264;O00264-2	O00264;O00264-2	Membrane-associated progesterone receptor component 1	PGRMC1	26.8948	27.5085	28.2937	28.6539	27.8084	28.4659	27.6072	27.8553	26.3075	24.7005	27.3127	27.8363	27.5024	27.9302	28.0393	28.0893	27.8558	28.0387	26.9084	27.5911	6	6	9	9	8	10	6	10	6	4	6	9	8	10	8	9	6	10	8	9
O00267-2;O00267	O00267-2;O00267	Transcription elongation factor SPT5	SUPT5H	25.3626	26.0884	25.8657	28.0985	26.9331	25.81	25.8153	26.6982	26.3729	24.6821	25.4937	26.1117	25.1195	25.6515	25.1197	26.2626	25.9555	25.9158	25.1604	25.8046	9	11	6	25	20	16	12	18	14	3	7	10	7	9	9	12	10	10	4	11
O00273;O00273-2	O00273;O00273-2	DNA fragmentation factor subunit alpha	DFFA	26.2211	24.976	25.0518	26.4098	24.2133	24.9021	24.2679	24.5871	24.0806	NaN	24.0982	24.6666	24.4627	25.0946	23.8071	24.7861	25.1035	25.3485	24.62	24.8776	6	4	5	8	4	5	2	4	4	NaN	3	3	2	2	2	4	3	4	4	5
O00291-3;O00291-4;O00291	O00291-3;O00291-4;O00291	Huntingtin-interacting protein 1	HIP1	23.8462	24.2676	24.025	25.2212	24.7273	23.7212	24.7262	24.7246	23.9038	24.8008	24.3224	25.6277	24.9554	25.7112	25.101	25.0324	24.4479	24.2143	25.1071	25.3984	2	5	3	8	4	4	5	7	3	1	5	8	5	7	4	6	4	6	2	7
O00299	O00299	Chloride intracellular channel protein 1	CLIC1	30.1664	29.9959	29.2886	30.3044	30.1359	29.3226	30.2035	30.1688	29.4778	29.832	30.3208	29.8816	30.0971	29.6738	29.8823	30.0379	29.7892	29.4706	30.3618	29.9826	14	13	14	14	14	13	12	13	13	13	14	14	14	14	14	14	13	12	14	14
O00303	O00303	Eukaryotic translation initiation factor 3 subunit F	EIF3F	26.8415	26.8894	26.8802	27.672	27.2458	26.8853	27.1869	27.0842	26.9329	26.1312	26.9282	26.883	26.8506	26.8431	27.1083	27.1069	27.0402	27.5478	27.0862	27.0318	10	10	10	10	9	10	9	10	10	6	8	7	10	9	9	9	7	8	6	8
O00330-3;O00330;O00330-2	O00330-3;O00330;O00330-2	Pyruvate dehydrogenase protein X component, mitochondrial	PDHX	28.2289	27.5842	29.1336	28.828	28.0938	27.7069	27.4549	27.7398	27.568	28.8961	27.3198	28.1622	28.094	28.0958	28.3318	27.0783	28.3209	27.7536	27.7879	27.8096	10	7	12	9	6	5	6	6	4	1	3	6	5	3	4	5	7	6	3	4
O00339-3;O00339;O00339-2;O00339-4	O00339-3;O00339;O00339-2;O00339-4	Matrilin-2	MATN2	24.1266	NaN	24.4916	24.9708	25.0066	25.3326	NaN	NaN	24.443	24.0263	NaN	25.9873	25.881	24.3467	26.1821	23.8469	23.7898	23.2007	22.8332	24.5722	1	NaN	4	6	7	7	NaN	NaN	4	1	NaN	8	9	5	9	2	1	2	2	3
O00391;O00391-2	O00391;O00391-2	Sulfhydryl oxidase 1	QSOX1	28.3184	23.1481	26.2731	24.879	26.1884	23.9486	23.5051	25.7366	28.349	27.3851	26.6651	25.4921	25.8171	26.907	27.4788	25.1536	27.3309	26.1366	23.8877	26.77	22	2	15	6	14	4	5	12	19	16	17	7	11	18	18	8	16	16	3	18
O00399	O00399	Dynactin subunit 6	DCTN6	22.8623	22.6147	NaN	22.7499	22.6987	NaN	22.8779	23.1616	22.775	NaN	23.4796	22.8081	NaN	22.563	NaN	22.7331	NaN	23.4259	22.8014	22.9329	1	2	NaN	1	1	NaN	1	1	1	NaN	2	1	NaN	1	NaN	1	NaN	1	1	1
O00400	O00400	Acetyl-coenzyme A transporter 1	SLC33A1	24.1153	23.5094	23.5845	23.6243	23.3181	NaN	23.4257	23.188	23.8529	NaN	23.1771	22.9986	23.1909	NaN	23.2953	23.6619	23.3329	22.769	NaN	23.9864	3	2	3	2	3	NaN	2	2	3	NaN	2	2	2	NaN	3	2	1	2	NaN	4
O00401	O00401	Neural Wiskott-Aldrich syndrome protein	WASL	24.1675	24.0957	24.1646	23.4618	24.6273	24.976	23.9441	24.0268	24.5651	NaN	24.2056	25.1559	24.454	24.1535	23.9337	23.4887	24.7704	24.2715	24.478	24.1885	3	4	5	4	7	7	3	3	3	NaN	3	7	3	3	2	4	2	5	4	3
O00410;O00410-3;O00410-2	O00410;O00410-3;O00410-2	Importin-5	IPO5	27.7263	27.8501	27.2954	27.6549	27.5983	28.0202	27.6209	27.6599	27.2758	27.294	28.489	27.8689	27.5845	27.4909	28.2907	28.1002	27.7025	28.6335	27.6347	28.5861	30	31	20	29	32	26	27	27	24	11	34	31	25	25	30	33	16	35	18	34
O00411	O00411	DNA-directed RNA polymerase, mitochondrial	POLRMT	23.1398	23.3217	23.2339	23.4287	23.4156	23.3416	23.9026	23.0766	23.0711	24.6265	22.8137	23.0917	23.5116	23.2807	23.0043	22.4464	NaN	24.5442	22.7399	23.2389	2	1	1	2	2	1	1	2	1	1	2	1	1	1	1	1	NaN	1	2	1
O00418	O00418	Eukaryotic elongation factor 2 kinase	EEF2K	NaN	NaN	NaN	20.4672	NaN	NaN	NaN	NaN	NaN	NaN	NaN	NaN	NaN	NaN	NaN	NaN	20.7193	NaN	NaN	NaN	NaN	NaN	NaN	1	NaN	NaN	NaN	NaN	NaN	NaN	NaN	NaN	NaN	NaN	NaN	NaN	2	NaN	NaN	NaN
O00422	O00422	Histone deacetylase complex subunit SAP18	SAP18	23.8869	23.56	24.1061	24.1874	23.9393	23.9211	23.6588	23.8639	23.9719	NaN	23.7294	23.9957	23.4768	23.8867	23.9073	24.1541	24.7177	24.3373	24.1081	23.8673	2	2	2	2	2	2	2	2	2	NaN	2	2	2	2	2	2	2	2	1	2
O00423;O00423-3	O00423;O00423-3	Echinoderm microtubule-associated protein-like 1	EML1	NaN	22.6098	NaN	NaN	NaN	NaN	NaN	NaN	NaN	NaN	NaN	NaN	NaN	NaN	NaN	NaN	NaN	NaN	NaN	NaN	NaN	1	1	NaN	NaN	NaN	NaN	1	NaN	NaN	NaN	NaN	NaN	NaN	NaN	NaN	NaN	NaN	NaN	NaN
O00425;O00425-2	O00425	Insulin-like growth factor 2 mRNA-binding protein 3	IGF2BP3	NaN	25.5679	27.3647	23.069	27.8896	29.8397	23.669	23.685	26.0155	23.6016	NaN	22.8903	NaN	NaN	23.9956	NaN	24.6159	23.7355	23.8007	NaN	NaN	12	15	3	15	17	2	2	2	1	NaN	2	NaN	NaN	2	NaN	2	3	1	NaN
O00429-3;O00429;O00429-5;O00429-6;O00429-7	O00429-3;O00429;O00429-5;O00429-6;O00429-7	Dynamin-1-like protein	DNM1L	21.9664	NaN	NaN	22.589	NaN	NaN	NaN	NaN	NaN	NaN	NaN	NaN	NaN	NaN	NaN	22.4136	NaN	22.592	NaN	21.961	1	NaN	NaN	1	1	NaN	NaN	NaN	NaN	NaN	1	NaN	NaN	NaN	NaN	1	NaN	1	NaN	1
O00429-4;O00429-2;O00429-8	O00429-4;O00429-2;O00429-8	Dynamin-1-like protein	DNM1L	27.5999	27.1972	27.2275	27.6991	27.6782	27.189	27.4845	27.5235	27.1323	26.1811	27.1951	27.3295	26.9691	26.8669	26.9428	27.332	27.6273	27.8342	27.938	27.2298	27	27	24	26	25	23	24	23	24	7	20	25	21	17	18	24	17	26	23	20
O00442;O00442-2	O00442;O00442-2	RNA 3-terminal phosphate cyclase	RTCA	24.7879	24.9441	24.72	25.5823	25.4172	24.8561	24.9842	25.3735	25.255	23.3244	24.2706	24.862	25.209	25.0032	23.823	25.191	24.964	24.3597	25.1855	25.2269	5	5	5	7	6	4	5	7	6	2	5	4	4	5	4	5	4	6	4	5
O00443;O00443-2	O00443	Phosphatidylinositol 4-phosphate 3-kinase C2 domain-containing subunit alpha	PIK3C2A	25.9468	25.5385	26.1279	25.6255	26.0513	25.9625	25.0579	25.8865	26.4972	NaN	25.8465	26.0684	26.0265	27.2907	26.0361	26.2385	26.5955	26.1856	NaN	25.8292	1	1	2	1	1	3	2	3	2	NaN	2	2	2	2	2	4	1	3	NaN	2
O00459	O00459	Phosphatidylinositol 3-kinase regulatory subunit beta	PIK3R2	NaN	NaN	NaN	22.1308	NaN	NaN	NaN	NaN	NaN	NaN	NaN	NaN	NaN	NaN	NaN	NaN	NaN	NaN	NaN	NaN	NaN	NaN	NaN	2	1	NaN	NaN	NaN	NaN	NaN	NaN	NaN	NaN	NaN	NaN	NaN	NaN	NaN	NaN	NaN
O00461	O00461	Golgi integral membrane protein 4	GOLIM4	24.4214	24.7382	NaN	23.4154	24.7777	23.1782	NaN	23.1814	23.4902	23.8557	NaN	24.5806	23.7376	23.2541	22.6344	25.5984	24.4523	24.624	NaN	25.0614	4	4	1	3	4	1	2	3	2	2	1	3	3	1	1	6	2	3	NaN	4
O00462	O00462	Beta-mannosidase	MANBA	NaN	22.6029	NaN	NaN	22.4708	NaN	NaN	NaN	NaN	NaN	NaN	NaN	22.2605	22.4002	23.7345	22.1687	23.95	22.5493	NaN	NaN	NaN	1	NaN	NaN	1	NaN	NaN	NaN	NaN	NaN	NaN	NaN	2	1	5	1	3	2	NaN	1
O00468-6;O00468-3;O00468-7;O00468-5;O00468-4;O00468;O00468-2	O00468-6;O00468-3;O00468-7;O00468-5;O00468-4;O00468;O00468-2	Agrin;Agrin N-terminal 110 kDa subunit;Agrin C-terminal 110 kDa subunit;Agrin C-terminal 90 kDa fragment;Agrin C-terminal 22 kDa fragment	AGRN	27.2793	27.2502	29.2426	27.8886	27.814	27.9757	27.0991	27.5	27.893	28.4726	27.8855	28.1668	26.9103	28.1978	28.4589	27.3317	28.2492	27.4556	27.5884	27.5871	30	25	47	34	31	31	25	25	29	33	31	34	20	34	40	31	39	26	22	28
O00469-2;O00469;O00469-3	O00469-2;O00469;O00469-3	Procollagen-lysine,2-oxoglutarate 5-dioxygenase 2	PLOD2	25.0208	26.4167	26.2841	27.5526	26.7124	22.4904	27.2938	28.5107	21.7808	27.791	21.7312	20.452	NaN	25.133	NaN	24.4165	22.03	25.3601	21.6009	22.8002	10	13	12	19	13	3	16	21	4	15	3	2	1	8	NaN	9	2	8	1	4
O00470;O00470-2;O14770-6;Q99687-3;Q99687;O14770-7;O14770-8;O14770-3;O14770-2;Q99687-2;O14770-4;O14770;A6NDR6;O14770-5	O00470;O00470-2	Homeobox protein Meis1	MEIS1	23.5742	22.7484	24.0584	24.3714	NaN	22.9281	22.8602	22.9162	NaN	NaN	22.899	22.5464	NaN	NaN	NaN	NaN	24.6763	23.4516	NaN	NaN	3	1	3	4	NaN	2	3	3	NaN	NaN	3	2	NaN	NaN	NaN	NaN	4	2	NaN	NaN
O00471	O00471	Exocyst complex component 5	EXOC5	22.8261	NaN	23.5169	22.7736	23.1596	23.1365	22.6642	23.2281	NaN	NaN	22.9209	23.8759	22.7145	23.6003	22.3996	23.3927	22.9911	22.9376	22.9518	22.8966	2	1	2	4	2	3	4	2	NaN	NaN	7	1	2	3	3	4	2	3	1	3
O00478-2;O00478;P78410-3;P78410-2;P78410;O00481-2;O00481-3;O00481-4;O00481	O00478-2;O00478	Butyrophilin subfamily 3 member A3	BTN3A3	NaN	23.0256	NaN	23.5031	22.9079	NaN	22.3992	23.154	NaN	NaN	NaN	22.4295	23.9326	NaN	NaN	23.0119	22.3259	NaN	NaN	22.3401	NaN	2	NaN	3	2	NaN	2	2	NaN	NaN	NaN	2	2	NaN	NaN	2	1	NaN	NaN	1
O00479	O00479	High mobility group nucleosome-binding domain-containing protein 4	HMGN4	19.7951	19.8511	20.2696	21.5919	19.9809	NaN	19.5459	NaN	NaN	NaN	19.0347	20.3378	20.1278	20.1136	20.0886	NaN	19.959	NaN	NaN	NaN	1	1	1	2	1	NaN	1	NaN	NaN	NaN	2	1	1	1	1	NaN	1	NaN	NaN	NaN
O00483	O00483	Cytochrome c oxidase subunit NDUFA4	NDUFA4	28.0853	26.7094	26.2725	27.1609	26.0265	25.9661	26.2647	26.7011	26.0555	24.863	26.8858	26.5833	26.091	26.1771	27.2332	26.891	27.2783	27.2311	26.6355	26.9012	4	3	3	4	4	3	4	4	3	4	4	4	3	4	4	3	3	3	4	3
O00487	O00487	26S proteasome non-ATPase regulatory subunit 14	PSMD14	26.1818	25.9739	25.6947	26.059	25.9392	26.2132	25.6762	26.2898	26.243	25.4547	26.0294	25.9469	25.6917	25.8093	26.1916	26.0461	26.2314	26.5862	26.0405	26.1384	7	7	7	7	7	6	6	8	7	2	7	7	6	7	5	7	5	7	4	7
O00499-9;O00499-10;O00499-7;O00499-8;O00499-4;O00499-6;O00499-11;O00499-3;O00499-2;O00499-5;O00499	O00499-9;O00499-10;O00499-7;O00499-8;O00499-4;O00499-6;O00499-11;O00499-3;O00499-2;O00499-5;O00499	Myc box-dependent-interacting protein 1	BIN1	24.2421	24.4973	24.222	24.2801	25.592	25.1561	24.1209	24.8298	23.2904	23.767	23.2967	25.3773	24.8411	24.8215	24.2575	24.9865	24.0959	23.1914	24.8789	23.9041	6	7	5	6	9	6	4	6	1	1	1	8	4	5	2	5	3	2	3	3
O00505	O00505	Importin subunit alpha-4	KPNA3	25.2403	25.8608	25.79	25.7752	25.0596	26.0475	25.3117	25.0822	25.3311	24.5736	25.5592	25.4578	24.9786	25.3665	24.7563	25.7821	25.3698	26.4966	23.8753	25.6309	6	5	8	7	7	6	5	7	6	2	6	6	5	4	5	8	6	9	1	6
O00515	O00515	Ladinin-1	LAD1	27.4784	23.0517	24.7999	25.8967	NaN	NaN	24.6067	24.2559	25.2802	NaN	24.9459	25.5818	24.6458	25.4348	25.5765	26.2983	26.4507	23.9149	23.929	26.1923	16	1	6	10	NaN	1	8	6	6	NaN	5	9	5	9	9	11	9	4	4	9
O00519	O00519	Fatty-acid amide hydrolase 1	FAAH	NaN	NaN	22.809	NaN	NaN	NaN	NaN	NaN	NaN	NaN	22.3423	21.9865	22.4705	22.8675	NaN	22.3779	NaN	NaN	NaN	22.8774	NaN	NaN	1	NaN	NaN	NaN	NaN	NaN	NaN	NaN	1	1	1	2	NaN	2	NaN	NaN	NaN	4
O00533;O00533-2	O00533;O00533-2	Neural cell adhesion molecule L1-like protein;Processed neural cell adhesion molecule L1-like protein	CHL1	NaN	NaN	NaN	NaN	22.9535	24.2058	NaN	NaN	NaN	NaN	22.189	NaN	NaN	NaN	23.2042	NaN	NaN	NaN	NaN	NaN	NaN	NaN	NaN	NaN	1	5	NaN	NaN	NaN	NaN	2	NaN	NaN	NaN	3	NaN	NaN	NaN	NaN	NaN
O00534;O00534-3;O00534-2;O00534-4	O00534;O00534-3;O00534-2	von Willebrand factor A domain-containing protein 5A	VWA5A	27.677	23.549	NaN	24.3996	23.0957	NaN	23.5105	23.9073	24.7132	NaN	24.2636	24.6148	25.712	24.4603	24.4789	24.748	25.0114	NaN	25.6431	24.4182	21	4	NaN	7	1	NaN	2	4	6	NaN	6	9	13	6	7	10	7	NaN	9	8
O00541;O00541-2	O00541;O00541-2	Pescadillo homolog	PES1	25.3147	22.7022	23.5955	24.4925	23.8494	23.9165	24.0922	22.5351	25.1176	21.6157	23.397	23.7239	22.673	23.8813	23.6056	24.0774	24.2183	25.6246	23.2877	24.3708	8	3	6	9	4	7	7	2	10	1	3	4	2	6	4	6	4	10	3	6
O00559;O00559-2	O00559;O00559-2	Receptor-binding cancer antigen expressed on SiSo cells	EBAG9	NaN	NaN	22.89	NaN	NaN	NaN	NaN	NaN	22.0545	NaN	NaN	NaN	NaN	NaN	22.1121	NaN	NaN	NaN	NaN	NaN	NaN	NaN	1	NaN	NaN	NaN	NaN	NaN	1	NaN	NaN	NaN	NaN	NaN	1	NaN	NaN	NaN	NaN	NaN
O00560;O00560-3	O00560;O00560-3	Syntenin-1	SDCBP	25.6743	24.9857	25.8373	25.2987	25.9259	25.8692	25.0382	25.6311	27.0247	26.2012	27.6347	25.4683	26.2619	26.7079	27.7152	26.0194	28.0077	25.5134	26.0407	26.0119	6	6	8	6	7	7	4	8	10	5	10	6	6	10	10	7	9	6	5	6
O00560-2	O00560-2	Syntenin-1	SDCBP	21.6868	NaN	21.9657	21.3036	21.3404	NaN	NaN	21.8874	22.5915	NaN	23.6673	NaN	21.9974	22.0876	23.7452	21.85	23.7792	21.5088	NaN	21.722	1	NaN	1	1	1	NaN	NaN	1	1	NaN	1	NaN	1	1	1	1	1	1	NaN	1
O00562-2;O00562	O00562-2;O00562	Membrane-associated phosphatidylinositol transfer protein 1	PITPNM1	NaN	NaN	21.298	NaN	21.4957	NaN	20.6712	20.2772	NaN	NaN	NaN	NaN	19.9895	20.1275	NaN	19.916	NaN	21.0976	NaN	19.7367	NaN	NaN	2	NaN	1	NaN	2	2	NaN	NaN	NaN	NaN	1	1	NaN	1	NaN	1	NaN	1
O00566	O00566	U3 small nucleolar ribonucleoprotein protein MPP10	MPHOSPH10	23.4803	NaN	22.9808	23.0281	22.7017	23.1878	NaN	NaN	22.1379	NaN	NaN	22.6373	22.4252	NaN	NaN	22.698	NaN	22.7135	NaN	22.7093	4	NaN	3	2	1	1	NaN	NaN	1	NaN	NaN	1	1	NaN	NaN	1	NaN	2	NaN	1
O00567	O00567	Nucleolar protein 56	NOP56	28.7789	27.9634	28.9168	28.7667	28.5605	28.8625	28.3903	27.9925	29.6084	26.8935	28.4962	28.5473	28.0059	28.2324	28.4241	28.1267	29.1885	29.0035	28.2025	28.3495	26	20	23	25	21	23	22	21	22	10	22	22	20	20	24	20	23	23	17	19
O00571;O00571-2;O15523-2;O15523;O15523-3;Q9NQI0-3;Q9NQI0-2;Q9NQI0-4;Q9NQI0	O00571;O00571-2;O15523-2;O15523	ATP-dependent RNA helicase DDX3X;ATP-dependent RNA helicase DDX3Y	DDX3X;DDX3Y	28.4646	28.5769	28.4262	28.8711	28.3197	28.3685	28.725	28.7364	28.0837	27.3277	28.2409	28.2202	28.0743	28.188	28.2859	28.5889	27.9584	28.8662	27.8194	28.4593	27	25	24	26	25	25	23	27	22	12	21	24	22	25	22	27	19	25	18	25
O00584;O00584-2	O00584	Ribonuclease T2	RNASET2	28.9312	25.8223	28.6066	25.8182	28.3159	26.6799	25.6508	26.053	29.7764	26.4708	27.1076	28.2848	27.8429	28.8078	26.9044	27.7477	30.0852	26.8706	26.9118	28.3304	10	6	8	5	9	5	5	5	11	4	5	8	8	11	8	6	11	6	5	10
O00592-2;O00592	O00592-2;O00592	Podocalyxin	PODXL	23.6254	23.0117	25.6941	24.6037	24.9049	25.7566	24.6185	23.6344	24.7792	24.0272	27.6596	27.0895	25.7851	27.1606	24.8179	25.3711	23.5641	26.1413	23.4224	25.2156	4	1	4	4	4	6	3	3	2	2	7	7	5	7	2	5	2	7	1	4
O00602	O00602	Ficolin-1	FCN1	NaN	22.0856	NaN	NaN	22.8329	NaN	NaN	23.6209	NaN	24.0326	NaN	NaN	NaN	26.0793	NaN	22.635	NaN	NaN	NaN	NaN	NaN	1	NaN	NaN	1	NaN	NaN	2	NaN	1	NaN	NaN	NaN	4	NaN	3	NaN	NaN	NaN	NaN
O00625	O00625	Pirin	PIR	24.4025	NaN	24.2728	22.4812	24.2314	22.7441	23.2807	24.4047	24.7189	NaN	23.7257	23.9046	23.6582	22.9169	23.6856	24.3509	NaN	25.5777	NaN	23.7255	4	NaN	4	1	4	1	2	4	4	NaN	5	2	1	1	1	5	NaN	4	NaN	4
O00629	O00629	Importin subunit alpha-3	KPNA4	26.4904	26.4746	27.0581	27.5445	26.5437	25.8542	26.2689	26.7121	26.2398	25.6916	26.7358	26.1336	26.0009	25.7777	26.1216	26.3369	26.4324	26.717	25.7647	26.5221	11	8	12	11	14	10	12	11	10	5	11	10	8	10	10	12	10	14	5	11
O00712;O00712-5;O00712-4;O00712-2;O00712-6	O00712;O00712-5;O00712-4;O00712-2	Nuclear factor 1 B-type	NFIB	NaN	22.2371	22.6408	23.1058	22.5975	23.6041	22.6758	21.9567	NaN	NaN	23.3835	22.6161	22.1882	21.7544	NaN	NaN	22.1883	NaN	NaN	22.1529	NaN	1	1	3	1	3	2	1	NaN	NaN	2	1	1	1	NaN	NaN	2	NaN	NaN	1
O00743;O00743-3;O00743-2	O00743;O00743-3;O00743-2	Serine/threonine-protein phosphatase 6 catalytic subunit;Serine/threonine-protein phosphatase 6 catalytic subunit, N-terminally processed	PPP6C	24.2872	25.1142	24.5391	25.2162	24.6436	24.0745	24.6571	24.8948	24.555	23.8322	24.0092	24.564	24.7261	24.6487	24.0964	24.7556	24.1408	24.7373	24.7871	24.4942	6	6	7	7	5	4	7	7	3	3	5	5	4	5	6	6	4	6	3	6
O00748;O00748-2	O00748;O00748-2	Cocaine esterase	CES2	25.2846	NaN	22.9225	NaN	23.2174	NaN	NaN	NaN	NaN	NaN	22.9168	NaN	NaN	NaN	NaN	NaN	NaN	NaN	NaN	NaN	7	NaN	1	NaN	1	NaN	NaN	NaN	NaN	NaN	3	NaN	NaN	NaN	NaN	NaN	NaN	NaN	NaN	NaN
O00754-2;O00754	O00754-2;O00754	Lysosomal alpha-mannosidase;Lysosomal alpha-mannosidase A peptide;Lysosomal alpha-mannosidase B peptide;Lysosomal alpha-mannosidase C peptide;Lysosomal alpha-mannosidase D peptide;Lysosomal alpha-mannosidase E peptide	MAN2B1	24.2653	25.0782	24.7021	26.1923	24.5238	24.8582	24.4804	23.8844	25.3447	24.072	23.9068	24.0795	23.856	24.8412	25.3004	24.5941	24.4292	24.6281	24.3403	24.0308	9	10	6	14	6	9	7	5	10	2	2	6	4	8	7	9	4	4	4	3
O00755	O00755	Protein Wnt-7a	WNT7A	NaN	NaN	NaN	NaN	NaN	NaN	NaN	NaN	NaN	25.3895	NaN	NaN	NaN	NaN	NaN	NaN	NaN	NaN	NaN	NaN	1	NaN	NaN	NaN	NaN	NaN	NaN	NaN	1	3	NaN	NaN	NaN	NaN	NaN	NaN	NaN	NaN	NaN	NaN
O00757	O00757	Fructose-1,6-bisphosphatase isozyme 2	FBP2	24.5755	24.3111	23.2982	22.4038	23.0186	NaN	22.7895	22.9156	NaN	23.2335	22.1454	24.4679	26.4492	24.0458	23.8991	24.085	24.2329	22.3133	NaN	23.7042	1	1	1	1	1	NaN	1	1	NaN	1	1	1	1	1	1	1	1	1	NaN	1
O00762-3;O00762;O00762-2;O00762-4	O00762-3;O00762;O00762-2	Ubiquitin-conjugating enzyme E2 C	UBE2C	NaN	NaN	NaN	23.5607	23.2072	NaN	NaN	23.669	NaN	NaN	NaN	NaN	NaN	NaN	NaN	NaN	NaN	NaN	NaN	NaN	NaN	NaN	NaN	4	2	1	NaN	4	NaN	NaN	NaN	NaN	NaN	NaN	NaN	NaN	NaN	1	NaN	NaN
O00764;O00764-3;O00764-2	O00764;O00764-3;O00764-2	Pyridoxal kinase	PDXK	27.2546	27.8112	28.7184	27.1111	27.5347	27.3313	27.8109	27.6633	27.3513	27.4852	29.0936	27.8915	28.2251	27.4843	28.1326	27.5243	27.0763	27.0548	27.5118	27.8027	10	11	13	11	10	10	12	12	10	8	13	11	11	13	12	12	9	13	7	11
O14493	O14493	Claudin-4	CLDN4	NaN	NaN	NaN	22.7894	22.426	NaN	NaN	NaN	NaN	NaN	NaN	NaN	NaN	NaN	NaN	NaN	NaN	NaN	NaN	NaN	NaN	NaN	NaN	1	1	NaN	NaN	NaN	NaN	NaN	NaN	NaN	NaN	NaN	NaN	NaN	NaN	NaN	NaN	NaN
O14494;O14494-2	O14494;O14494-2	Lipid phosphate phosphohydrolase 1	PPAP2A	NaN	NaN	NaN	NaN	NaN	NaN	NaN	NaN	22.6808	NaN	NaN	22.7811	NaN	22.0266	23.1264	NaN	NaN	NaN	NaN	23.3526	NaN	NaN	NaN	NaN	NaN	NaN	NaN	NaN	1	NaN	NaN	2	NaN	1	2	NaN	NaN	NaN	NaN	1
O14495	O14495	Lipid phosphate phosphohydrolase 3	PPAP2B	NaN	22.1632	NaN	21.5115	22.9209	NaN	NaN	NaN	NaN	NaN	NaN	NaN	22.5207	NaN	22.6867	NaN	23.1608	NaN	22.7979	NaN	NaN	1	NaN	1	2	NaN	NaN	NaN	NaN	NaN	NaN	NaN	1	NaN	2	NaN	1	NaN	2	NaN
O14497;O14497-3;O14497-2	O14497;O14497-3;O14497-2	AT-rich interactive domain-containing protein 1A	ARID1A	21.4037	21.1538	21.1473	21.9123	NaN	21.6368	21.0062	22.4003	21.1542	NaN	NaN	22.2142	NaN	21.2375	NaN	21.7906	22.5003	22.8567	NaN	20.9502	1	1	1	1	1	1	1	2	1	NaN	NaN	1	1	1	NaN	1	3	3	NaN	1
O14498	O14498	Immunoglobulin superfamily containing leucine-rich repeat protein	ISLR	NaN	25.6517	23.1262	NaN	25.4416	24.8243	23.3793	25.0946	NaN	28.472	22.7945	25.6437	24.3381	22.0112	25.1109	22.1622	NaN	NaN	NaN	23.6389	NaN	4	1	NaN	6	4	3	7	NaN	7	2	5	4	1	4	1	NaN	NaN	NaN	3
O14519-2;O14519	O14519-2;O14519	Cyclin-dependent kinase 2-associated protein 1	CDK2AP1	19.9304	19.7425	NaN	NaN	20.574	20.7678	20.1673	20.8716	19.8556	NaN	20.187	20.2726	20.1656	20.4672	20.2525	21.0171	19.8765	21.3676	20.7025	19.9026	1	1	NaN	NaN	1	1	1	1	1	NaN	1	1	1	1	1	1	1	1	1	1
O14521-2;O14521;O14521-4	O14521-2;O14521	Succinate dehydrogenase [ubiquinone] cytochrome b small subunit, mitochondrial	SDHD	23.8241	23.1235	24.1754	23.7938	22.8902	NaN	23.2092	23.1977	22.6933	NaN	23.0964	NaN	22.8115	22.8684	22.4736	22.4684	23.3839	22.4252	NaN	22.3572	2	2	2	1	1	1	3	1	1	NaN	1	NaN	1	1	1	1	2	1	1	1
O14545	O14545	TRAF-type zinc finger domain-containing protein 1	TRAFD1	20.2564	19.9989	20.051	20.4535	20.3632	NaN	20.3694	20.9641	19.8261	NaN	20.3157	20.5625	20.4315	20.4177	NaN	20.8564	20.6975	22.2638	NaN	20.2836	1	1	1	1	1	NaN	1	1	1	NaN	1	1	1	1	NaN	1	1	1	NaN	1
O14548	O14548	Cytochrome c oxidase subunit 7A-related protein, mitochondrial	COX7A2L	25.7256	24.8173	24.7236	24.8824	25.0605	23.0005	24.4824	24.2052	24.3352	NaN	24.8742	24.3189	23.8642	24.9494	25.7171	24.7343	26.1589	25.426	24.9902	24.8151	3	2	3	4	3	1	3	2	2	NaN	4	2	2	2	3	3	4	4	2	3
O14558	O14558	Heat shock protein beta-6	HSPB6	24.5477	25.0283	22.7561	24.9325	24.3264	25.481	23.7908	24.2116	23.1604	24.4054	23.6122	26.16	26.5628	23.6499	24.5187	23.879	23.1511	23.2618	24.8191	25.8041	5	6	1	4	6	7	2	1	3	4	2	7	6	2	3	4	1	3	4	7
O14561	O14561	Acyl carrier protein, mitochondrial	NDUFAB1	25.6356	24.0009	24.9576	25.1493	24.6203	24.3464	24.7738	25.5818	24.0881	NaN	24.7907	24.4345	24.2061	24.848	24.3517	24.3956	24.3962	25.0461	22.7326	24.794	2	2	3	3	2	3	2	2	1	NaN	2	2	3	1	3	1	1	2	2	1
O14562	O14562	Ubiquitin domain-containing protein UBFD1	UBFD1	23.5174	23.8435	24.7197	24.0949	24.3438	24.4116	24.3044	24.3553	24.2826	23.469	25.0801	23.7124	23.3805	24.2326	23.9104	24.9748	23.8295	24.2948	24.5108	23.8996	2	3	3	3	3	3	2	3	3	1	3	2	2	3	3	3	2	3	2	2
O14569	O14569	Cytochrome b561 domain-containing protein 2	CYB561D2	24.2605	22.6116	22.2482	22.7547	22.3829	NaN	22.7169	22.4914	NaN	NaN	22.8142	NaN	23.0981	23.3246	NaN	22.8146	22.876	22.4922	22.7983	22.8391	1	1	1	1	1	NaN	1	1	NaN	NaN	1	NaN	1	1	NaN	1	1	1	1	1
O14579;O14579-2;O14579-3	O14579;O14579-2;O14579-3	Coatomer subunit epsilon	COPE	27.4609	27.7571	27.6352	27.4221	27.7199	27.1759	27.7047	27.3761	27.3491	26.6531	27.2882	27.3762	27.5623	27.4273	27.4539	27.7407	27.4075	27.2344	27.2297	27.9277	13	13	11	14	12	12	13	13	10	6	12	10	12	11	11	12	10	12	9	14
O14617-5;O14617;O14617-4;O14617-2;O14617-3	O14617-5;O14617;O14617-4;O14617-2;O14617-3	AP-3 complex subunit delta-1	AP3D1	26.8119	26.792	26.3179	25.9663	26.4696	25.9868	26.7846	26.7362	26.6516	25.5014	26.7437	26.7502	27.1454	26.6728	26.9109	27.5802	26.5976	27.0868	26.9099	27.4012	20	20	13	20	19	14	15	22	19	8	21	21	24	18	21	29	15	23	15	24
O14618	O14618	Copper chaperone for superoxide dismutase	CCS	24.9101	24.9339	25.5375	25.4219	25.7008	25.2487	24.6596	25.4006	25.3935	24.4085	25.1341	24.8131	24.953	24.7451	24.7462	24.8518	24.8076	24.8634	24.5444	24.0719	4	4	4	6	6	6	3	4	4	1	4	4	4	2	3	4	4	5	2	1
O14638	O14638	Ectonucleotide pyrophosphatase/phosphodiesterase family member 3;Alkaline phosphodiesterase I;Nucleotide pyrophosphatase	ENPP3	22.2059	NaN	NaN	NaN	22.8966	NaN	NaN	21.7365	22.3305	21.6973	25.5666	NaN	27.613	26.1942	NaN	23.3343	29.1851	NaN	NaN	23.6441	1	NaN	NaN	NaN	1	NaN	NaN	1	1	1	11	NaN	21	19	NaN	5	23	NaN	NaN	6
O14639-2;O14639-6;O14639;O14639-4;O14639-3;O14639-5	O14639-2;O14639-6;O14639;O14639-4;O14639-3;O14639-5	Actin-binding LIM protein 1	ABLIM1	25.5182	24.5794	24.7425	23.7323	25.6781	26.3843	23.8604	22.5784	26.0795	NaN	26.3251	24.9421	24.9171	24.5818	24.3076	24.268	24.2677	25.7841	24.4181	24.5003	9	3	7	3	8	11	3	1	11	NaN	11	7	6	5	4	3	5	11	2	3
O14647-2;O14647;O14647-3	O14647-2;O14647	Chromodomain-helicase-DNA-binding protein 2	CHD2	NaN	21.4718	NaN	NaN	21.0266	21.594	21.7282	22.3178	22.3511	NaN	21.528	21.8846	NaN	NaN	NaN	21.8652	22.091	22.1721	NaN	21.4407	NaN	1	1	1	1	2	1	1	3	NaN	1	1	NaN	NaN	NaN	3	2	2	1	1
O14653;O14653-2;O14653-3	O14653;O14653-2;O14653-3	Golgi SNAP receptor complex member 2	GOSR2	23.2761	24.0056	23.0448	23.0435	24.0304	23.5303	23.4228	23.6431	23.6251	NaN	23.5873	23.5183	23.8925	23.7166	23.1497	23.9681	NaN	23.7647	23.3287	23.2881	2	3	1	2	2	2	3	2	2	NaN	1	1	3	1	2	5	NaN	3	2	4
O14656;O14656-2	O14656	Torsin-1A	TOR1A	21.4375	22.2577	NaN	21.9773	22.3389	21.5376	21.6046	22.4247	21.6524	22.0309	23.4288	22.1921	21.8894	22.5291	NaN	22.2324	NaN	22.1212	NaN	22.1757	1	1	NaN	1	1	2	1	2	3	1	3	2	3	3	NaN	1	NaN	2	NaN	1
O14662-2;O14662-4;O14662-5;O14662;O14662-3;O14662-6	O14662-2;O14662-4;O14662-5;O14662;O14662-3;O14662-6	Syntaxin-16	STX16	22.8706	NaN	NaN	22.9491	NaN	NaN	22.8513	22.322	NaN	NaN	NaN	NaN	NaN	NaN	NaN	NaN	NaN	NaN	NaN	NaN	3	1	1	2	NaN	1	1	1	1	NaN	NaN	NaN	2	NaN	1	NaN	NaN	NaN	NaN	NaN
O14672;O14672-2	O14672;O14672-2	Disintegrin and metalloproteinase domain-containing protein 10	ADAM10	25.9906	25.2193	26.1214	25.2866	25.5974	24.9926	25.3696	25.7676	26.7477	NaN	24.5943	26.2027	25.7047	26.0526	25.6246	25.8382	26.3411	25.7559	25.2241	25.6626	9	7	13	8	8	3	8	11	12	2	3	9	8	8	6	6	10	6	6	6
O14681;O14681-3	O14681;O14681-3	Etoposide-induced protein 2.4 homolog	EI24	23.1046	NaN	23.7969	22.6285	22.7266	22.7679	22.7662	22.7294	NaN	NaN	22.3408	22.828	NaN	22.3641	22.88	22.9969	23.1043	23.0223	NaN	22.8197	2	NaN	2	2	2	1	1	2	NaN	NaN	1	2	NaN	1	2	2	2	3	NaN	1
O14683	O14683	Tumor protein p53-inducible protein 11	TP53I11	23.2917	23.1627	23.1185	22.9904	23.0704	23.176	22.9641	23.8822	NaN	22.8209	NaN	22.7623	NaN	22.4148	NaN	22.6336	NaN	23.3655	NaN	22.499	2	2	1	2	1	1	2	2	NaN	1	NaN	1	NaN	2	NaN	2	NaN	2	NaN	2
O14684	O14684	Prostaglandin E synthase	PTGES	NaN	NaN	NaN	NaN	NaN	NaN	NaN	NaN	19.7596	NaN	NaN	NaN	NaN	NaN	NaN	NaN	NaN	NaN	NaN	NaN	NaN	NaN	NaN	NaN	NaN	NaN	NaN	NaN	1	NaN	NaN	NaN	NaN	NaN	NaN	NaN	NaN	NaN	NaN	NaN
O14727-3;O14727-4;O14727-2;O14727;O14727-5;O14727-6	O14727-3;O14727-4;O14727-2;O14727;O14727-5	Apoptotic protease-activating factor 1	APAF1	23.3693	22.8269	NaN	23.6753	23.2522	22.9393	21.9951	23.1893	23.1252	24.4892	23.1763	22.7882	23.6829	23.79	23.3561	22.6895	NaN	22.8816	24.5387	23.3521	1	1	NaN	1	1	2	2	1	1	1	1	2	1	2	1	2	NaN	2	2	1
O14732-2;O14732	O14732-2;O14732	Inositol monophosphatase 2	IMPA2	22.3825	NaN	NaN	NaN	NaN	NaN	NaN	NaN	25.0454	NaN	NaN	NaN	NaN	23.0597	23.3695	NaN	NaN	22.5276	NaN	NaN	1	NaN	NaN	NaN	NaN	NaN	NaN	NaN	3	NaN	NaN	NaN	NaN	1	3	NaN	NaN	1	NaN	NaN
O14734	O14734	Acyl-coenzyme A thioesterase 8	ACOT8	22.0068	NaN	24.3044	23.2296	NaN	NaN	NaN	24.3055	25.1042	NaN	NaN	NaN	NaN	NaN	NaN	NaN	NaN	22.2671	NaN	NaN	2	NaN	6	2	NaN	NaN	NaN	2	4	NaN	NaN	NaN	NaN	NaN	NaN	NaN	NaN	1	NaN	NaN
O14735;O14735-3;O14735-2	O14735;O14735-3	CDP-diacylglycerol--inositol 3-phosphatidyltransferase	CDIPT	24.8006	25.5172	25.1918	25.9674	25.2247	25.9516	25.2119	25.3253	25.6103	25.0314	25.7657	25.378	25.5655	25.4657	25.799	25.3539	25.8571	24.6849	25.36	25.4445	5	5	5	6	5	5	4	4	5	5	4	4	4	5	4	5	4	4	5	4
O14737;O14737-2	O14737;O14737-2	Programmed cell death protein 5	PDCD5	24.887	25.1964	25.219	25.479	25.6564	25.9965	25.5898	25.5846	25.2458	24.3633	24.669	24.8824	24.7597	24.6708	24.4792	25.0984	25.3248	25.7974	24.8276	24.6047	4	5	4	5	5	5	5	4	3	2	3	5	5	5	4	4	4	5	2	3
O14744;O14744-5;O14744-2;O14744-3;O14744-4	O14744;O14744-5;O14744-2;O14744-3;O14744-4	Protein arginine N-methyltransferase 5;Protein arginine N-methyltransferase 5, N-terminally processed	PRMT5	27.0634	25.8565	26.2189	26.0134	26.3882	26.7652	25.9321	25.6961	27.0266	NaN	26.3317	26.1373	26.6214	25.9335	26.4079	26.6264	26.7732	26.7374	26.4708	26.5909	12	11	11	12	11	11	10	10	11	NaN	9	8	10	8	10	11	8	12	8	11
O14745;O14745-2	O14745;O14745-2	Na(+)/H(+) exchange regulatory cofactor NHE-RF1	SLC9A3R1	26.848	25.5176	25.9261	24.5422	25.5514	25.6488	25.6887	27.8761	26.1352	23.1018	26.8598	26.2262	26.4839	27.4823	25.9703	26.2922	27.3153	26.7662	25.9157	26.4746	11	4	6	4	5	6	7	10	7	2	8	7	5	9	5	8	12	8	5	7
O14772;O14772-2;Q59H18-3;Q59H18-4;Q59H18-1;O14772-3	O14772;O14772-2	Fucose-1-phosphate guanylyltransferase	FPGT	21.5079	NaN	21.8416	21.364	21.5306	NaN	NaN	20.9371	20.9051	NaN	NaN	21.2541	21.8278	22.3765	22.2086	21.9761	NaN	21.232	21.8064	22.2546	1	1	1	2	1	NaN	NaN	1	1	NaN	1	2	3	3	2	1	NaN	1	1	2
O14773;O14773-2	O14773;O14773-2	Tripeptidyl-peptidase 1	TPP1	28.3678	28.3535	28.3538	29.0367	28.9576	28.2033	28.5111	28.8421	28.6113	28.6867	28.1649	28.0246	28.4313	28.5289	29.6793	28.2567	28.0454	27.9874	28.9982	27.8872	7	7	6	8	7	7	7	7	10	6	6	7	6	7	9	6	4	7	7	5
O14776-2;O14776	O14776-2;O14776	Transcription elongation regulator 1	TCERG1	25.7596	25.924	26.0301	25.8981	25.8131	26.3831	25.7383	26.1558	26.4395	25.8458	25.5504	25.8219	25.4134	25.632	25.7379	26.107	26.1073	26.0542	24.9732	25.5585	11	12	12	10	11	12	10	14	12	1	12	12	9	8	10	13	12	15	7	10
O14786;O14786-3;O14786-2	O14786;O14786-3;O14786-2	Neuropilin-1	NRP1	NaN	23.1614	NaN	NaN	23.5847	23.6701	22.91	22.658	23.2724	24.2394	NaN	23.5796	24.0305	23.3313	NaN	22.6406	NaN	NaN	NaN	22.8535	NaN	3	NaN	NaN	6	6	1	1	2	6	NaN	2	4	2	NaN	1	NaN	NaN	NaN	1
O14787-2;O14787	O14787-2;O14787	Transportin-2	TNPO2	24.7109	25.3162	24.798	27.1188	25.8699	26.1522	25.2661	25.5806	25.0744	NaN	25.5414	25.3069	24.8771	24.4139	25.4141	25.0192	25.2701	25.3661	24.9016	25.1899	4	10	7	15	8	12	7	11	6	NaN	7	8	7	7	6	9	3	7	4	7
O14791;O14791-2;O14791-3	O14791;O14791-2;O14791-3	Apolipoprotein L1	APOL1	25.6313	23.5398	23.4359	23.0352	24.5591	24.1214	23.048	24.4147	24.1328	26.3257	23.4646	23.9501	23.2376	24.4979	23.2302	24.243	25.2674	22.9626	25.413	23.467	5	2	3	2	4	3	3	5	5	6	3	5	4	5	3	5	3	2	5	4
O14802	O14802	DNA-directed RNA polymerase III subunit RPC1	POLR3A	21.5679	21.1566	21.5208	20.7634	21.1494	21.2238	NaN	20.7956	21.1973	NaN	21.5348	NaN	20.6499	NaN	NaN	21.3039	NaN	21.5935	22.0266	21.1948	2	1	1	2	1	2	NaN	2	2	NaN	2	NaN	1	NaN	NaN	2	NaN	2	2	1
O14817	O14817	Tetraspanin-4	TSPAN4	NaN	NaN	NaN	NaN	22.6665	22.5037	NaN	NaN	NaN	NaN	NaN	NaN	NaN	NaN	NaN	NaN	NaN	NaN	NaN	NaN	NaN	NaN	NaN	NaN	1	1	NaN	NaN	NaN	NaN	NaN	NaN	NaN	NaN	NaN	NaN	NaN	NaN	NaN	NaN
O14818;O14818-4;Q8TAA3-2;Q8TAA3-5;Q8TAA3	O14818;O14818-4	Proteasome subunit alpha type-7	PSMA7	28.2118	28.5159	28.464	28.6287	28.4868	28.5743	28.3103	28.6235	28.4492	27.4428	28.6495	28.5948	28.7699	28.2964	28.4939	29.043	28.2401	28.6391	28.5779	28.6629	13	13	13	10	13	12	13	14	13	8	13	11	12	12	13	13	11	13	12	13
O14828;O14828-2	O14828;O14828-2	Secretory carrier-associated membrane protein 3	SCAMP3	25.0199	24.3354	23.969	24.4353	25.5414	22.7923	23.9542	24.8909	24.5271	NaN	23.5505	24.4201	24.5283	23.3113	24.5954	25.5162	24.5672	24.2607	25.0586	25.7449	5	2	2	5	5	1	4	5	4	NaN	3	3	5	1	4	5	4	3	3	5
O14832;O14832-2	O14832;O14832-2	Phytanoyl-CoA dioxygenase, peroxisomal	PHYH	NaN	NaN	NaN	23.6258	22.9398	NaN	NaN	NaN	24.0103	NaN	NaN	NaN	NaN	NaN	NaN	NaN	NaN	21.7012	NaN	NaN	NaN	NaN	NaN	1	2	NaN	NaN	1	3	NaN	NaN	1	NaN	NaN	NaN	NaN	NaN	1	NaN	NaN
O14841	O14841	5-oxoprolinase	OPLAH	25.147	NaN	28.28	25.0586	24.5255	23.873	28.1288	23.8142	28.6735	NaN	25.0353	23.817	24.1485	25.9634	27.1939	24.7714	24.2391	23.5471	22.0252	24.219	9	NaN	26	11	10	3	25	3	24	NaN	11	6	5	10	19	11	6	3	1	4
O14874-2;O14874-3;O14874	O14874-2;O14874-3;O14874	[3-methyl-2-oxobutanoate dehydrogenase [lipoamide]] kinase, mitochondrial	BCKDK	24.0035	23.7328	23.3899	23.2387	22.5571	23.1144	23.6995	22.8734	24.3719	NaN	23.4605	23.8099	23.6231	23.1526	22.8764	22.8804	23.8018	22.7438	22.9598	22.9995	3	4	4	6	2	1	2	4	4	NaN	3	1	3	2	3	4	3	1	1	3
O14879	O14879	Interferon-induced protein with tetratricopeptide repeats 3	IFIT3	NaN	25.7062	24.3324	28.3485	28.6113	26.2607	27.3007	28.932	NaN	25.2016	22.2982	23.3613	25.8007	23.7197	24.5693	25.3453	NaN	NaN	26.4597	NaN	NaN	11	6	21	19	10	16	21	NaN	4	1	4	11	4	5	10	NaN	NaN	8	NaN
O14880	O14880	Microsomal glutathione S-transferase 3	MGST3	28.1449	26.7826	27.3897	27.1328	27.1526	27.0072	26.7409	26.121	28.193	26.7095	26.5248	27.4673	26.933	27.055	27.8547	27.4113	28.757	26.8771	26.8596	27.74	4	4	4	5	4	4	4	4	5	3	4	4	5	3	4	5	4	3	4	4
O14896;O14896-2	O14896;O14896-2	Interferon regulatory factor 6	IRF6	23.6619	NaN	23.0937	22.6991	23.6153	NaN	NaN	NaN	21.0328	NaN	23.5444	22.8471	22.6586	22.7889	23.2252	23.223	24.2893	23.3403	NaN	22.3459	5	NaN	1	5	6	NaN	NaN	NaN	1	NaN	4	4	2	1	4	3	4	3	NaN	2
O14907	O14907	Tax1-binding protein 3	TAX1BP3	24.3052	25.1935	24.9436	25.5645	25.4718	25.614	24.3297	24.5749	24.5738	24.7139	25.5995	25.0803	24.9824	24.4752	25.4597	24.2392	24.9406	24.4159	24.8196	24.5385	2	2	3	2	2	3	2	2	2	2	3	2	3	3	3	3	2	2	2	3
O14908;O14908-2;Q8TF64	O14908;O14908-2	PDZ domain-containing protein GIPC1	GIPC1	25.6869	24.1306	23.7668	26.6118	24.7281	24.7905	23.2389	24.4795	24.2728	22.9428	24.4052	24.1814	24.2326	24.4661	24.8675	24.6706	25.0209	24.6377	24.2532	24.7715	6	4	3	8	3	7	3	6	4	2	6	1	4	3	6	6	3	3	2	3
O14920-4;O14920-2;O14920;O14920-3	O14920-4;O14920-2;O14920	Inhibitor of nuclear factor kappa-B kinase subunit beta	IKBKB	NaN	21.7301	NaN	22.6551	22.0238	21.3025	21.8954	21.9265	21.7103	NaN	21.8278	22.3579	21.6923	NaN	NaN	21.7291	NaN	21.9716	NaN	21.9722	NaN	2	NaN	4	1	2	1	1	1	NaN	1	2	1	NaN	1	1	NaN	1	NaN	1
O14925;Q5SRD1	O14925;Q5SRD1	Mitochondrial import inner membrane translocase subunit Tim23;Putative mitochondrial import inner membrane translocase subunit Tim23B	TIMM23;TIMM23B	22.9921	NaN	NaN	22.8057	22.8963	22.6535	22.4829	22.472	22.3338	NaN	NaN	22.4821	22.1379	NaN	22.4878	23.1025	23.1265	23.2784	22.5314	NaN	1	NaN	1	2	2	3	1	1	3	NaN	1	1	1	NaN	1	1	2	2	2	1
O14929;O14929-2	O14929;O14929-2	Histone acetyltransferase type B catalytic subunit	HAT1	24.1465	25.2853	24.2343	26.3339	24.702	24.8548	24.4557	25.106	23.9831	NaN	24.4303	24.3619	24.2082	24.7266	24.6564	25.5644	23.3716	25.9028	24.0984	24.844	4	8	4	7	5	4	5	6	3	NaN	5	5	5	5	5	7	2	8	3	5
O14933;O14933-2	O14933;O14933-2	Ubiquitin/ISG15-conjugating enzyme E2 L6	UBE2L6	23.7431	25.5905	24.6545	26.5219	26.8986	24.4876	26.714	27.7765	22.3287	22.884	23.4239	24.681	25.7583	23.887	24.0757	25.628	NaN	23.3754	25.9102	22.423	2	4	3	6	6	2	6	6	1	1	1	2	4	3	1	5	NaN	2	4	1
O14936-3;O14936-4;O14936-6;O14936-2;O14936;O14936-5	O14936-3;O14936-4;O14936-6;O14936-2;O14936;O14936-5	Peripheral plasma membrane protein CASK	CASK	25.024	24.8937	24.9657	23.0363	24.7995	24.8777	24.2306	23.9065	24.056	NaN	26.6252	24.8663	25.3576	24.2136	25.7212	25.5287	25.4606	24.8846	24.9443	24.6906	5	7	10	2	6	10	5	6	2	NaN	15	7	8	7	11	9	8	8	4	6
O14949	O14949	Cytochrome b-c1 complex subunit 8	UQCRQ	26.461	25.124	25.652	25.6255	25.5465	24.9227	25.9974	25.3198	25.4112	24.5606	25.1197	25.3504	25.2601	25.5529	25.6721	25.442	26.1533	26.2908	25.5273	25.0224	3	2	2	2	2	2	2	2	2	2	1	2	2	2	2	2	2	2	2	2
P19105;O14950	P19105;O14950	Myosin regulatory light chain 12A;Myosin regulatory light chain 12B	MYL12A;MYL12B	27.2083	28.576	27.2986	27.7567	27.901	27.6551	28.4558	27.9957	27.6357	27.6982	27.171	27.7	27.1895	27.5346	27.7629	27.4226	26.832	27.3786	27.389	27.5084	4	4	3	4	4	4	4	4	4	3	3	4	4	4	4	4	3	4	4	4
O14957	O14957	Cytochrome b-c1 complex subunit 10	UQCR11	24.4254	22.8048	23.753	23.7193	23.0648	22.7477	23.294	24.0739	23.7942	23.0126	23.3316	23.0611	23.5808	23.8265	23.7573	23.9502	25.2688	24.2736	23.9664	24.0592	1	1	1	1	1	1	1	1	1	1	1	1	1	1	1	1	1	1	1	1
O14964;O14964-2	O14964;O14964-2	Hepatocyte growth factor-regulated tyrosine kinase substrate	HGS	25.0065	25.3419	25.2613	24.7791	25.4864	25.2258	25.1798	25.3392	25.4493	24.8273	25.067	25.4627	25.3032	25.6351	25.2208	25.1239	25.33	25.2483	25.2659	25.4534	6	7	6	5	9	5	6	7	6	2	5	7	6	5	7	7	5	7	6	6
O14967;O14967-2	O14967;O14967-2	Calmegin	CLGN	24.6217	NaN	NaN	23.0091	NaN	NaN	27.4605	22.8138	NaN	25.5241	21.6666	NaN	21.4969	22.985	21.7143	24.8506	23.3573	NaN	23.9809	24.2621	2	NaN	NaN	2	NaN	NaN	7	1	NaN	1	1	NaN	1	1	1	6	3	NaN	1	6
O14972;O14972-2	O14972;O14972-2	Down syndrome critical region protein 3	DSCR3	22.7415	21.6639	22.1163	22.051	21.9154	23.1416	22.4383	22.366	22.1793	NaN	23.2849	22.2004	22.547	22.1697	22.7347	22.5519	NaN	21.8246	22.6213	22.5598	2	1	2	3	2	1	2	2	1	NaN	3	3	3	3	1	4	1	2	2	2
O14974;O14974-4;O14974-3;O14974-2;O14974-5	O14974;O14974-4;O14974-3;O14974-2;O14974-5	Protein phosphatase 1 regulatory subunit 12A	PPP1R12A	25.7126	27.0976	25.7768	26.2787	26.6721	26.9075	26.8717	27.0854	26.5269	25.9355	26.5075	26.8754	26.5295	26.4234	25.8185	26.4183	26.296	26.6323	26.4499	26.2861	10	14	9	16	16	15	20	17	12	6	14	16	14	10	7	13	13	16	9	11
O14975-2;O14975	O14975-2;O14975	Very long-chain acyl-CoA synthetase	SLC27A2	NaN	NaN	NaN	NaN	NaN	NaN	NaN	22.0649	NaN	NaN	24.115	NaN	NaN	NaN	NaN	21.9661	NaN	22.4664	NaN	23.346	NaN	NaN	NaN	NaN	NaN	NaN	NaN	1	NaN	NaN	7	NaN	NaN	NaN	NaN	1	NaN	3	NaN	4
O14976;O14976-2	O14976;O14976-2	Cyclin-G-associated kinase	GAK	25.295	24.3199	24.4394	24.6463	23.267	23.6783	25.118	25.1203	24.7626	NaN	24.8866	24.4933	24.9289	24.3853	23.9585	25.0896	24.9041	24.8751	24.1323	24.5475	10	6	10	12	2	4	9	11	8	NaN	6	6	11	5	5	11	9	11	3	10
O14979-3;O14979-2	O14979-3;O14979-2	Heterogeneous nuclear ribonucleoprotein D-like	HNRNPDL	27.1068	28.0004	27.294	28.066	27.6039	27.791	26.5648	28.3382	27.8046	26.2637	27.4076	27.5609	27.5645	27.175	27.7477	28.0046	28.3277	27.9618	27.7084	27.6788	5	6	5	7	7	7	6	6	7	4	6	7	4	6	7	7	6	7	5	6
O14980	O14980	Exportin-1	XPO1	28.8428	28.8421	29.572	29.4301	29.2258	29.031	29.1109	29.0182	28.9747	27.9835	29.0157	28.9555	28.5817	28.6994	28.8629	29.2487	28.8878	29.1964	28.4574	29.0714	36	34	39	37	40	37	36	36	35	15	32	35	35	34	34	38	29	36	23	34
O14981;O14981-2	O14981;O14981-2	TATA-binding protein-associated factor 172	BTAF1	NaN	21.5675	NaN	21.1477	NaN	NaN	22.5387	21.3975	NaN	NaN	21.5858	NaN	NaN	NaN	21.7225	NaN	NaN	23.0654	NaN	NaN	NaN	1	NaN	1	NaN	NaN	2	1	1	NaN	1	NaN	NaN	NaN	1	NaN	NaN	4	NaN	NaN
O15013-7;O15013-4;O15013-5;O15013-6;O15013	O15013-7;O15013-4;O15013-5;O15013-6;O15013	Rho guanine nucleotide exchange factor 10	ARHGEF10	NaN	NaN	NaN	NaN	NaN	NaN	NaN	NaN	NaN	NaN	NaN	21.5981	NaN	NaN	NaN	NaN	NaN	NaN	NaN	NaN	NaN	NaN	NaN	NaN	NaN	NaN	NaN	NaN	NaN	NaN	NaN	1	NaN	NaN	NaN	NaN	NaN	NaN	NaN	NaN
O15018-2;O15018	O15018-2;O15018	PDZ domain-containing protein 2;Processed PDZ domain-containing protein 2	PDZD2	NaN	NaN	NaN	NaN	NaN	NaN	NaN	NaN	21.994	NaN	21.5184	NaN	NaN	22.4618	NaN	NaN	NaN	NaN	NaN	NaN	NaN	NaN	NaN	NaN	NaN	NaN	NaN	NaN	2	NaN	1	NaN	NaN	1	NaN	NaN	NaN	NaN	1	NaN
O15020-2;O15020	O15020-2;O15020	Spectrin beta chain, non-erythrocytic 2	SPTBN2	27.2625	21.5704	28.8286	26.418	22.6114	22.9038	26.8405	25.1926	23.5692	24.1943	28.0226	25.9731	23.3596	22.3337	26.7492	23.1731	24.3976	26.0308	24.1531	22.8706	25	3	38	14	3	4	21	6	2	1	36	14	1	3	24	6	8	18	5	3
O15027-2;O15027-4;O15027-3;O15027;O15027-5	O15027-2;O15027-4;O15027-3;O15027;O15027-5	Protein transport protein Sec16A	SEC16A	26.1307	25.7395	25.4956	25.2248	25.5359	25.0539	25.3719	26.1316	23.5892	22.6302	26.7664	25.981	26.1008	26.0513	25.9104	26.7052	25.6042	26.2139	25.487	26.6168	11	9	6	13	10	8	9	14	4	2	15	8	12	13	10	16	9	14	6	15
O15031	O15031	Plexin-B2	PLXNB2	26.2166	25.7163	26.2364	25.1938	25.7968	25.7379	25.695	26.0704	26.2553	23.5852	25.8566	26.1576	25.5901	26.4147	26.1259	25.3358	25.452	25.7466	25.0481	25.3191	16	13	15	11	12	9	12	14	14	2	13	17	10	15	12	8	10	14	6	9
O15042-2;O15042;O15042-3	O15042-2;O15042;O15042-3	U2 snRNP-associated SURP motif-containing protein	U2SURP	25.4286	24.5894	24.6051	26.335	25.9	24.7301	24.7417	24.9686	25.2293	23.1191	24.5356	24.6826	24.2699	24.4237	24.6832	24.9126	25.0747	25.654	24.7351	24.5375	8	7	4	13	11	7	6	10	9	1	6	8	6	6	5	8	7	11	3	6
O15049	O15049	NEDD4-binding protein 3	N4BP3	NaN	NaN	17.6244	18.0329	NaN	NaN	18.6599	NaN	17.3712	NaN	NaN	NaN	NaN	NaN	17.8015	NaN	NaN	NaN	NaN	NaN	NaN	NaN	1	1	NaN	NaN	1	NaN	1	NaN	NaN	NaN	NaN	NaN	1	NaN	NaN	NaN	NaN	NaN
O15061;O15061-2;O15061-3	O15061;O15061-2	Synemin	SYNM	NaN	NaN	NaN	20.3204	20.4911	NaN	NaN	NaN	20.0948	NaN	20.2318	NaN	19.384	NaN	NaN	NaN	20.3924	NaN	NaN	NaN	NaN	NaN	NaN	1	1	NaN	NaN	NaN	1	NaN	1	NaN	2	NaN	NaN	NaN	1	NaN	NaN	NaN
O15067	O15067	Phosphoribosylformylglycinamidine synthase	PFAS	26.1786	26.3246	25.7891	23.9732	26.459	26.664	25.3315	25.6521	26.2628	25.3005	26.4201	26.3223	26.4757	26.7401	26.6968	26.7054	26.8761	27.8066	25.4857	26.5605	14	13	7	4	13	15	9	9	9	1	15	14	11	14	8	15	14	20	6	15
O15075-2;O15075;O15075-3;O15075-4	O15075-2;O15075	Serine/threonine-protein kinase DCLK1	DCLK1	NaN	21.1495	NaN	NaN	NaN	NaN	NaN	NaN	NaN	NaN	NaN	NaN	NaN	NaN	21.8598	NaN	NaN	23.2784	NaN	NaN	NaN	2	NaN	NaN	NaN	NaN	NaN	NaN	NaN	NaN	NaN	NaN	NaN	NaN	1	NaN	NaN	3	NaN	NaN
O15084-2;O15084;O15084-4;O15084-1	O15084-2;O15084;O15084-4;O15084-1	Serine/threonine-protein phosphatase 6 regulatory ankyrin repeat subunit A	ANKRD28	21.9002	21.4095	21.6071	22.2258	NaN	22.0584	23.1588	21.5375	NaN	NaN	NaN	22.0848	NaN	NaN	NaN	NaN	NaN	NaN	NaN	NaN	1	1	2	3	NaN	1	3	2	NaN	NaN	NaN	1	NaN	NaN	NaN	NaN	NaN	1	NaN	NaN
O15091-2;O15091;O15091-4;O15091-3	O15091-2;O15091;O15091-4;O15091-3	Mitochondrial ribonuclease P protein 3	KIAA0391	24.1618	NaN	NaN	21.6283	NaN	22.3416	22.3036	NaN	21.9897	NaN	22.249	22.232	NaN	NaN	22.1486	22.3708	23.1393	22.7651	21.9289	NaN	4	NaN	NaN	1	NaN	1	2	NaN	2	NaN	1	2	NaN	NaN	2	1	3	3	1	NaN
O15116	O15116	U6 snRNA-associated Sm-like protein LSm1	LSM1	23.2355	NaN	22.9303	22.7435	NaN	NaN	22.9641	23.0375	23.3795	NaN	23.2663	23.3167	22.9774	23.2681	22.9259	23.0653	22.7464	23.6632	NaN	23.4051	1	NaN	2	3	NaN	NaN	1	1	2	NaN	1	1	3	1	1	2	2	2	NaN	2
O15117;O15117-2;O15117-3	O15117;O15117-2;O15117-3	FYN-binding protein	FYB	NaN	22.5245	NaN	NaN	NaN	NaN	22.5801	22.2168	NaN	NaN	NaN	NaN	NaN	21.8884	NaN	NaN	NaN	NaN	22.5236	NaN	NaN	3	NaN	NaN	NaN	NaN	2	1	NaN	NaN	NaN	NaN	NaN	1	NaN	NaN	NaN	NaN	3	NaN
O15118;O15118-2	O15118;O15118-2	Niemann-Pick C1 protein	NPC1	23.8997	23.1069	24.0871	24.3711	23.2726	NaN	NaN	24.3358	23.967	23.766	23.0897	22.5602	23.1627	23.554	24.6099	23.3448	24.0931	22.9777	NaN	23.4218	3	3	5	1	1	NaN	NaN	1	3	1	2	2	1	4	3	1	1	1	NaN	1
O15120-2;O15120	O15120-2;O15120	1-acyl-sn-glycerol-3-phosphate acyltransferase beta	AGPAT2	22.2415	NaN	NaN	NaN	NaN	NaN	NaN	NaN	NaN	NaN	21.8163	NaN	NaN	21.7359	21.8292	NaN	NaN	21.1157	21.5889	NaN	1	NaN	NaN	NaN	NaN	NaN	NaN	NaN	NaN	NaN	1	NaN	NaN	1	1	NaN	NaN	1	1	NaN
O15121	O15121	Sphingolipid delta(4)-desaturase DES1	DEGS1	NaN	23.4536	22.5597	23.7847	23.4762	23.3636	23.96	23.8176	24.2682	NaN	NaN	22.7974	23.2033	22.8841	23.6637	22.9178	23.5974	22.4993	23.1823	NaN	NaN	3	2	2	2	2	3	3	2	NaN	NaN	3	1	1	2	1	2	2	2	NaN
O15126;O15126-2	O15126;O15126-2	Secretory carrier-associated membrane protein 1	SCAMP1	24.2412	23.9753	24.0716	23.6239	23.5008	23.5247	24.0266	24.3705	24.4987	NaN	24.4399	24.2872	23.9369	24.0419	23.8181	24.6743	23.9413	24.9774	23.3386	24.6172	3	2	2	3	1	1	3	2	2	NaN	3	1	3	2	2	3	2	4	2	3
O15127	O15127	Secretory carrier-associated membrane protein 2	SCAMP2	25.4304	25.1495	25.8864	24.6877	24.8825	24.5535	24.7178	25.3097	26.3494	24.4299	25.295	25.002	25.6656	25.171	26.2666	25.1533	25.0805	24.8471	25.7553	25.2693	2	2	2	2	2	2	2	2	2	1	2	2	2	2	2	2	2	2	2	2
O15143	O15143	Actin-related protein 2/3 complex subunit 1B	ARPC1B	28.703	29.4471	28.1779	28.8784	28.8068	28.0734	29.4518	29.0726	28.46	29.1085	28.9733	28.9969	28.9995	29.0862	28.6765	29.0255	28.456	28.1121	29.2699	28.4424	17	17	15	16	14	11	15	16	14	15	14	15	15	13	15	16	11	13	13	15
O15144	O15144	Actin-related protein 2/3 complex subunit 2	ARPC2	29.1455	29.6089	28.5347	29.3384	29.2147	28.9107	29.5198	29.1766	28.8128	29.2112	29.4363	29.2464	29.2941	29.1878	28.9339	29.4342	28.8514	28.7565	29.4347	28.9823	18	19	17	17	18	16	18	19	15	19	17	18	18	16	18	19	15	15	18	18
O15145	O15145	Actin-related protein 2/3 complex subunit 3	ARPC3	28.0674	28.6572	27.6337	28.2975	28.0999	27.8998	28.5657	28.23	27.9281	28.38	28.2181	28.5476	28.4194	28.3271	28.0169	28.4686	27.9448	27.83	28.2065	28.033	7	7	6	8	8	7	7	7	7	6	7	7	5	6	8	8	6	8	7	8
O15155;O15155-2	O15155;O15155-2	BET1 homolog	BET1	23.2982	23.1374	22.7159	23.2679	23.2697	23.2508	23.2367	NaN	22.3252	NaN	NaN	22.4839	22.7777	NaN	22.0353	22.5762	NaN	NaN	NaN	23.2145	1	1	1	1	1	1	1	NaN	1	NaN	NaN	1	1	NaN	1	1	NaN	NaN	NaN	2
O15156	O15156	Zinc finger and BTB domain-containing protein 7B	ZBTB7B	NaN	NaN	NaN	NaN	NaN	NaN	NaN	NaN	NaN	NaN	NaN	NaN	NaN	NaN	21.9706	NaN	NaN	NaN	NaN	22.7789	NaN	NaN	NaN	NaN	NaN	NaN	NaN	NaN	NaN	NaN	NaN	NaN	NaN	NaN	1	NaN	NaN	NaN	NaN	1
O15160-2;O15160	O15160-2;O15160	DNA-directed RNA polymerases I and III subunit RPAC1	POLR1C	25.1802	23.6958	23.9157	24.8279	23.7326	23.8025	23.5304	23.0736	24.0587	NaN	23.2558	23.2113	22.6023	NaN	23.573	23.8649	24.0186	24.8694	NaN	23.775	8	3	5	6	4	3	2	2	3	NaN	2	3	2	NaN	3	3	3	6	NaN	3
O15162-2;O15162	O15162-2;O15162	Phospholipid scramblase 1	PLSCR1	22.1143	23.7715	22.8118	26.155	24.1908	22.7044	25.2536	26.2335	26.3755	24.9816	NaN	22.6654	23.9623	24.0643	24.4801	24.3082	25.6185	23.7245	23.7374	22.9437	1	2	2	6	3	2	4	5	6	4	NaN	1	2	3	5	4	5	2	2	1
O15164-2;O15164	O15164-2;O15164	Transcription intermediary factor 1-alpha	TRIM24	21.7462	22.4356	21.8455	21.9589	22.3298	22.8673	22.1545	22.1753	22.0667	NaN	22.2959	22.4222	22.473	22.1066	22.2536	22.4809	22.2318	22.474	NaN	22.5311	2	1	1	4	2	2	2	1	1	NaN	1	3	2	1	1	1	1	3	NaN	2
O15173;O15173-2	O15173;O15173-2	Membrane-associated progesterone receptor component 2	PGRMC2	26.2883	26.3682	26.3231	26.1699	26.8379	26.2422	26.7066	26.6566	25.9294	26.0497	26.3288	26.2907	26.3619	26.7334	26.7991	26.2657	26.0391	26.3631	26.2316	26.5521	7	8	7	6	6	7	6	7	5	3	8	5	7	6	7	7	5	5	6	6
O15195-2;O15195	O15195-2;O15195	Villin-like protein	VILL	23.6966	NaN	23.8418	NaN	NaN	NaN	NaN	NaN	NaN	NaN	NaN	22.9924	NaN	NaN	23.6258	23.5957	NaN	NaN	NaN	NaN	6	NaN	6	NaN	NaN	NaN	NaN	NaN	NaN	NaN	NaN	1	NaN	NaN	1	1	NaN	NaN	NaN	NaN
O15204-2;O15204	O15204-2;O15204	ADAM DEC1	ADAMDEC1	NaN	NaN	NaN	NaN	NaN	NaN	NaN	NaN	NaN	NaN	NaN	22.21	22.314	NaN	NaN	NaN	NaN	NaN	NaN	NaN	NaN	NaN	NaN	NaN	NaN	NaN	NaN	NaN	NaN	NaN	NaN	1	1	NaN	NaN	NaN	NaN	NaN	NaN	NaN
O15212	O15212	Prefoldin subunit 6	PFDN6	24.7925	24.9443	24.729	25.7039	25.109	25.0687	25.3155	25.4704	24.7279	NaN	24.6049	24.8867	24.6797	24.4073	24.8053	25.0092	24.779	25.1599	25.0179	24.9661	4	5	5	5	4	2	3	5	3	NaN	4	3	3	3	4	5	4	5	2	4
O15213	O15213	WD repeat-containing protein 46	WDR46	NaN	NaN	22.933	21.9684	21.6963	NaN	NaN	NaN	21.6632	NaN	NaN	NaN	NaN	NaN	NaN	22.1062	21.7811	22.017	NaN	21.0733	NaN	NaN	3	2	1	NaN	NaN	NaN	1	NaN	NaN	NaN	NaN	NaN	NaN	1	1	2	NaN	1
O15228-2;O15228	O15228-2;O15228	Dihydroxyacetone phosphate acyltransferase	GNPAT	22.3473	NaN	22.2379	22.0587	21.9143	NaN	NaN	22.4408	NaN	NaN	21.7661	NaN	NaN	21.9291	NaN	22.3672	NaN	NaN	NaN	22.5782	1	NaN	2	1	1	NaN	NaN	1	NaN	NaN	1	1	NaN	2	1	3	NaN	NaN	NaN	2
O15230;O15230-2	O15230	Laminin subunit alpha-5	LAMA5	27.3365	26.9025	28.6531	27.8093	28.4652	28.2463	25.5026	26.896	29.2767	27.1888	27.8329	28.408	27.6505	27.5162	30.3398	27.8492	28.3195	27.4771	28.6259	27.9171	36	24	59	39	49	45	12	18	60	16	37	44	32	24	73	39	40	34	41	38
O15231-3;O15231-2	O15231-3;O15231-2	Zinc finger protein 185	ZNF185	24.7771	23.7284	25.6368	24.1575	NaN	23.2528	23.2604	23.7509	NaN	NaN	25.1943	23.2798	23.4898	23.6103	24.3308	NaN	25.6955	NaN	23.743	NaN	5	2	8	7	NaN	1	3	2	NaN	NaN	7	1	1	1	4	NaN	8	NaN	2	NaN
O15235	O15235	28S ribosomal protein S12, mitochondrial	MRPS12	24.1931	22.4345	NaN	22.378	22.213	NaN	22.6497	NaN	22.1911	NaN	NaN	21.9529	NaN	21.2591	21.9454	NaN	22.6398	22.1164	NaN	NaN	1	1	NaN	1	1	NaN	1	NaN	1	NaN	NaN	1	NaN	1	1	NaN	1	1	NaN	NaN
O15243	O15243	Leptin receptor gene-related protein	LEPROT	21.5595	21.5228	22.8329	21.0098	20.9722	NaN	21.2606	21.1878	21.6943	21.5958	20.8323	21.179	20.9055	21.359	21.5791	21.0682	21.8858	20.7481	22.3762	20.9634	1	1	1	1	1	NaN	1	1	1	1	1	1	1	1	1	1	1	1	1	1
O15247	O15247	Chloride intracellular channel protein 2	CLIC2	20.9246	23.8474	NaN	21.0354	21.8111	21.5566	22.695	23.1291	22.5754	21.5894	NaN	22.907	23.6974	21.7741	20.7777	22.9643	20.7039	20.9168	23.9221	NaN	1	7	NaN	1	2	2	4	6	1	1	NaN	3	5	1	1	2	1	1	2	NaN
O15254;O15254-2	O15254;O15254-2	Peroxisomal acyl-coenzyme A oxidase 3	ACOX3	21.381	24.159	25.4067	23.7348	23.538	23.8034	22.1412	22.9252	23.3727	NaN	NaN	23.0878	26.1071	24.8367	22.9694	24.7854	23.7495	24.0623	24.0315	25.7794	1	1	11	3	1	1	2	4	4	1	NaN	5	13	7	4	8	2	7	4	12
O15258	O15258	Protein RER1	RER1	26.543	26.0983	26.7248	26.4011	26.3024	25.7268	25.9667	26.5706	26.1045	25.5623	24.6974	25.9114	26.2185	26.229	25.709	26.4615	25.937	26.0108	26.379	26.2839	4	4	4	4	4	3	3	4	4	4	4	4	3	4	3	4	4	4	3	3
O15260-2;O15260;O15260-3	O15260-2;O15260;O15260-3	Surfeit locus protein 4	SURF4	27.1195	28.1573	26.9184	27.3416	27.7528	27.2766	27.7317	27.935	26.1877	27.1433	28.0225	26.9408	27.3651	27.1954	27.4056	27.6394	27.4129	27.1766	27.1972	27.6788	4	5	5	5	5	5	5	5	5	4	5	4	5	5	5	5	3	5	5	5
O15264;O15264-2	O15264;O15264-2	Mitogen-activated protein kinase 13	MAPK13	22.205	NaN	22.5696	23.0972	NaN	NaN	NaN	22.289	NaN	NaN	23.2761	21.7765	NaN	21.3675	21.742	22.3332	NaN	21.8792	21.9102	22.3112	1	NaN	1	2	NaN	NaN	NaN	2	NaN	NaN	3	1	NaN	1	2	2	NaN	1	1	1
O15269;O15269-2	O15269	Serine palmitoyltransferase 1	SPTLC1	25.3126	25.6923	25.8003	26.0303	25.1747	25.1877	25.5638	25.997	25.2425	23.3938	25.4336	25.4037	25.3812	25.3006	24.901	25.7406	25.7426	25.3768	25.4137	25.4071	6	8	7	7	7	7	7	7	6	1	6	6	6	7	7	7	6	6	6	5
O15270	O15270	Serine palmitoyltransferase 2	SPTLC2	23.6734	NaN	23.6108	24.5241	23.8196	23.9586	22.9561	NaN	24.5395	NaN	NaN	NaN	25.1325	23.0039	23.8722	23.8514	22.8895	23.9249	NaN	NaN	5	NaN	4	7	3	2	1	NaN	5	NaN	NaN	NaN	2	1	2	4	2	3	NaN	NaN
O15287	O15287	Fanconi anemia group G protein	FANCG	NaN	21.2867	NaN	21.7825	22.7747	NaN	NaN	23.2158	NaN	NaN	NaN	NaN	NaN	NaN	NaN	21.5893	NaN	NaN	NaN	NaN	1	1	NaN	1	1	NaN	1	1	NaN	NaN	NaN	NaN	NaN	NaN	NaN	1	NaN	NaN	1	NaN
O15294;O15294-3;O15294-2;O15294-4	O15294;O15294-3;O15294-2;O15294-4	UDP-N-acetylglucosamine--peptide N-acetylglucosaminyltransferase 110 kDa subunit	OGT	23.741	24.0566	24.3454	25.1743	24.3209	23.9399	24.6254	24.8728	24.3733	NaN	24.0918	24.1257	23.4568	24.4657	24.2277	24.9511	24.3599	24.5818	24.1907	24.137	2	7	5	10	6	6	7	8	7	NaN	7	2	3	3	5	8	4	9	3	7
O15305;O15305-2;Q92871	O15305	Phosphomannomutase 2	PMM2	26.423	26.1753	26.5884	24.5409	25.7726	24.7695	25.8291	24.8424	25.9241	24.3192	26.9902	26.0385	26.3062	26.2123	25.7403	26.0512	26.4767	25.5998	25.5834	26.8833	9	11	11	3	9	3	10	5	9	2	10	7	8	7	7	8	9	7	5	11
O15320-8;O15320-4;O15320-3;O15320-10;O15320;Q96PC5;O15320-6;O15320-5;O15320-9;O15320-7;O15320-2;Q8IX95	O15320-8;O15320-4;O15320-3;O15320-10;O15320;Q96PC5;O15320-6;O15320-5;O15320-9;O15320-7;O15320-2	cTAGE family member 5;Melanoma inhibitory activity protein 2	CTAGE5;MIA2	24.9886	24.1131	23.8889	24.5598	23.9728	NaN	24.3264	23.6439	24.653	NaN	24.5417	24.5307	25.0306	24.9126	24.1609	26.0491	24.7906	24.962	23.9057	25.2019	9	5	4	7	2	2	6	4	4	NaN	8	6	7	4	5	10	8	9	2	8
O15321-2;O15321	O15321-2;O15321	Transmembrane 9 superfamily member 1	TM9SF1	24.5776	23.8933	23.8996	26.3402	24.2729	23.2775	24.1246	23.9395	24.6077	NaN	24.8654	23.8785	24.1678	24.2289	24.2164	24.7968	24.3196	23.5715	24.1595	25.2579	5	4	2	2	4	3	3	2	3	NaN	5	2	3	4	2	5	3	2	1	3
O15327	O15327	Type II inositol 3,4-bisphosphate 4-phosphatase	INPP4B	22.5792	21.9701	NaN	NaN	NaN	NaN	NaN	25.5917	NaN	NaN	23.506	NaN	NaN	NaN	23.4111	NaN	NaN	21.0274	NaN	22.2326	2	1	NaN	NaN	NaN	NaN	NaN	7	NaN	NaN	4	NaN	NaN	NaN	6	NaN	NaN	1	NaN	1
O15347	O15347	High mobility group protein B3	HMGB3	25.951	26.4705	26.7042	27.6718	26.5288	26.8473	25.7634	26.3954	26.8516	24.3799	26.3213	26.6544	25.9787	26.7213	26.6002	27.2499	26.2814	27.7643	25.4496	27.0303	3	4	3	5	5	5	4	4	4	2	3	4	4	3	3	5	5	5	3	5
O15355	O15355	Protein phosphatase 1G	PPM1G	26.0861	26.8247	26.3943	27.52	26.496	26.5527	27.0487	26.7233	25.8889	25.6807	27.0909	27.0091	26.2809	26.0483	26.5813	27.0213	26.1444	27.6253	25.5755	27.0104	7	6	7	10	10	8	11	7	7	2	8	7	6	6	9	6	6	9	6	8
O15357;O15357-2	O15357;O15357-2	Phosphatidylinositol 3,4,5-trisphosphate 5-phosphatase 2	INPPL1	22.9521	23.2647	23.9801	22.7496	23.279	23.1227	22.7948	23.0876	22.6418	22.2252	NaN	22.8577	23.2302	NaN	NaN	22.8363	NaN	22.5833	NaN	23.6001	1	5	7	3	2	3	3	5	2	1	NaN	1	4	1	NaN	3	NaN	3	NaN	3
O15371-2;O15371-3;O15371	O15371-2;O15371-3;O15371	Eukaryotic translation initiation factor 3 subunit D	EIF3D	27.3781	27.4984	27.315	28.0103	27.4909	27.5933	27.2874	27.4183	27.8216	26.7941	27.2874	27.565	27.2942	27.1343	27.2941	27.6822	27.6534	27.9308	27.2201	27.3986	16	17	14	18	15	15	16	16	15	7	17	16	15	13	16	17	13	18	12	12
O15372	O15372	Eukaryotic translation initiation factor 3 subunit H	EIF3H	26.1115	26.3671	26.1832	27.0589	26.6432	26.2898	26.3128	26.3347	26.345	25.2421	26.1688	26.0331	26.2945	26.084	26.2357	26.5848	26.131	26.8806	26.7515	26.125	9	12	9	9	10	9	9	11	9	4	8	11	8	8	10	10	8	10	7	7
O15382;O15382-2	O15382;O15382-2	Branched-chain-amino-acid aminotransferase, mitochondrial	BCAT2	27.1727	25.5576	25.6631	27.188	26.3191	25.4669	25.4638	25.7035	25.6575	25.5787	26.6013	25.5866	26.5665	25.5078	25.287	25.4475	28.0939	25.3772	23.641	26.1104	12	8	9	13	11	9	7	8	7	2	11	8	10	8	5	8	13	9	2	9
O15397;O15397-2	O15397;O15397-2	Importin-8	IPO8	NaN	23.1053	22.8856	22.8934	24.1632	22.8075	22.5615	24.1541	21.9563	NaN	21.9064	22.6796	22.4142	21.6474	NaN	22.6579	22.938	23.645	21.6086	21.8591	NaN	3	2	5	5	5	4	5	3	NaN	2	1	3	1	NaN	2	1	6	2	3
O15400-2;O15400	O15400-2;O15400	Syntaxin-7	STX7	26.0376	26.1886	26.1266	25.7688	25.2605	25.7368	25.8366	25.8491	25.648	25.51	25.1836	26.1978	26.0653	25.9806	25.2805	25.8417	25.4615	25.6132	25.772	25.8493	8	7	6	6	7	6	7	7	7	3	7	8	8	7	6	6	6	5	6	7
O15427	O15427	Monocarboxylate transporter 4	SLC16A3	25.8392	23.9646	25.0701	23.8311	23.5153	NaN	25.5449	26.3829	25.3484	24.3151	23.8076	22.3187	22.4496	NaN	NaN	23.9845	NaN	23.5823	21.6986	23.0915	8	5	6	4	4	NaN	6	7	5	4	4	1	2	1	NaN	4	1	5	1	1
O15438-4;O15438;O15438-2	O15438-4;O15438	Canalicular multispecific organic anion transporter 2	ABCC3	23.0935	NaN	NaN	NaN	NaN	NaN	NaN	NaN	NaN	NaN	NaN	22.6614	NaN	NaN	23.1791	NaN	NaN	NaN	NaN	22.4929	1	NaN	NaN	NaN	NaN	NaN	NaN	NaN	NaN	1	NaN	2	NaN	NaN	2	NaN	NaN	NaN	1	1
O15439-2;O15439;O15439-4;O15439-3	O15439-2;O15439;O15439-4;O15439-3	Multidrug resistance-associated protein 4	ABCC4	NaN	23.187	25.9498	24.9592	23.6823	NaN	23.5917	NaN	NaN	NaN	NaN	NaN	23.5551	NaN	NaN	23.2686	22.5623	25.1871	NaN	NaN	NaN	2	12	8	1	NaN	5	NaN	NaN	NaN	NaN	NaN	3	NaN	NaN	2	1	11	NaN	NaN
O15446;O15446-2	O15446;O15446-2	DNA-directed RNA polymerase I subunit RPA34	CD3EAP	NaN	NaN	NaN	NaN	NaN	NaN	NaN	NaN	NaN	NaN	NaN	NaN	NaN	NaN	NaN	NaN	22.4474	22.4986	NaN	NaN	NaN	NaN	NaN	NaN	NaN	1	NaN	NaN	NaN	NaN	NaN	NaN	NaN	NaN	NaN	NaN	1	1	NaN	NaN
O15460-2;O15460	O15460-2;O15460	Prolyl 4-hydroxylase subunit alpha-2	P4HA2	24.4308	26.3925	25.7301	26.0799	26.2028	24.2816	26.714	27.3059	25.8586	26.9982	24.6083	22.1795	23.1328	24.3168	24.4249	25.5127	24.1332	25.1434	23.7692	24.4524	7	9	11	8	10	3	11	12	9	9	5	2	3	5	4	10	3	7	2	5
O15484	O15484	Calpain-5	CAPN5	24.4151	22.8172	27.7343	NaN	22.6109	NaN	NaN	23.8881	22.3455	NaN	NaN	22.3814	NaN	NaN	NaN	NaN	NaN	NaN	NaN	NaN	8	2	12	NaN	1	NaN	NaN	2	1	NaN	NaN	2	NaN	NaN	NaN	NaN	NaN	NaN	NaN	NaN
O15498;O15498-2	O15498;O15498-2	Synaptobrevin homolog YKT6	YKT6	25.5532	26.4182	26.3694	25.2544	25.9126	25.8601	25.4549	24.9411	25.3016	24.6797	25.4943	25.959	25.6677	25.7544	25.6823	26.006	25.7358	25.8305	25.5592	25.8714	7	8	8	7	8	6	7	5	6	2	7	7	7	6	7	7	6	7	3	7
O15511;O15511-2	O15511;O15511-2	Actin-related protein 2/3 complex subunit 5	ARPC5	27.7484	28.4466	27.0981	28.0244	27.6897	27.4663	27.9359	28.0058	27.3457	27.734	27.6923	27.8132	27.8805	27.9529	27.2337	28.1047	27.4925	27.2277	28.131	27.4655	6	6	6	7	6	6	6	7	7	7	7	7	7	7	7	7	7	7	7	7
O15533;O15533-3;O15533-2;O15533-4	O15533;O15533-3;O15533-2;O15533-4	Tapasin	TAPBP	25.6193	26.7021	25.4352	27.6216	25.8867	24.6438	27.103	27.8221	24.7432	26.0887	24.989	25.4198	27.6988	24.0822	25.9225	27.2381	24.4512	24.1429	27.1287	24.6009	3	4	2	5	3	3	4	6	2	1	3	4	5	1	2	4	1	1	5	2
O15540;O15540-2	O15540;O15540-2	Fatty acid-binding protein, brain	FABP7	NaN	NaN	NaN	NaN	NaN	NaN	NaN	NaN	NaN	NaN	NaN	NaN	NaN	22.5733	NaN	NaN	NaN	NaN	NaN	NaN	NaN	NaN	NaN	NaN	NaN	NaN	NaN	NaN	NaN	NaN	NaN	NaN	NaN	1	NaN	NaN	NaN	NaN	NaN	NaN
O15551;O95484;P56747	O15551	Claudin-3	CLDN3	25.5271	NaN	25.4237	24.8936	25.6864	23.8294	25.0333	25.3244	25.3694	23.153	25.0245	25.1266	24.5126	25.4913	25.1362	24.2274	25.9566	25.6432	23.7876	NaN	3	NaN	2	3	2	2	2	3	2	1	2	2	2	2	2	2	2	2	1	1
O43143	O43143	Pre-mRNA-splicing factor ATP-dependent RNA helicase DHX15	DHX15	27.3994	27.5244	27.8891	27.7144	27.8786	27.9608	27.8362	28.4032	28.4002	26.7004	27.3787	27.94	27.6737	27.9145	28.0934	28.2923	28.4124	28.1984	27.8083	28.0188	23	20	16	17	21	22	19	23	22	6	20	20	20	19	21	22	19	24	17	20
O43148;O43148-2	O43148;O43148-2	mRNA cap guanine-N7 methyltransferase	RNMT	23.5394	23.727	24.2877	23.7954	23.5797	24.3031	23.3066	24.1495	23.8642	NaN	22.6408	23.4545	22.4366	23.3522	23.4701	23.3695	23.977	23.4185	NaN	23.8387	2	4	4	4	3	5	4	4	3	NaN	2	3	1	2	3	3	2	3	NaN	3
O43149;O43149-2;O43149-3	O43149	Zinc finger ZZ-type and EF-hand domain-containing protein 1	ZZEF1	22.4788	NaN	22.1943	22.8948	23.4534	NaN	21.9575	NaN	22.4631	23.2087	22.9529	22.4992	22.4761	22.6945	21.9324	21.6329	NaN	22.3803	22.5301	22.3741	1	NaN	2	6	3	NaN	1	NaN	2	1	5	1	2	2	1	1	NaN	1	2	2
O43150-2;O43150	O43150-2;O43150	Arf-GAP with SH3 domain, ANK repeat and PH domain-containing protein 2	ASAP2	NaN	NaN	22.1584	19.5347	NaN	NaN	22.185	NaN	NaN	NaN	20.21	NaN	NaN	NaN	NaN	NaN	NaN	NaN	NaN	NaN	NaN	NaN	2	1	NaN	NaN	2	1	NaN	NaN	1	NaN	NaN	NaN	NaN	NaN	NaN	1	NaN	NaN
O43156	O43156	TELO2-interacting protein 1 homolog	TTI1	NaN	21.2375	20.2912	21.1857	NaN	20.0509	NaN	21.4878	22.4098	NaN	21.5855	NaN	21.0072	NaN	NaN	20.9181	NaN	21.341	NaN	21.289	1	1	1	2	NaN	1	NaN	3	4	NaN	2	NaN	1	NaN	NaN	1	NaN	2	NaN	1
O43157-2;O43157	O43157-2;O43157	Plexin-B1	PLXNB1	NaN	NaN	NaN	20.5274	NaN	NaN	NaN	NaN	NaN	NaN	NaN	NaN	NaN	NaN	NaN	NaN	NaN	NaN	NaN	NaN	NaN	NaN	NaN	1	NaN	NaN	NaN	NaN	NaN	NaN	NaN	NaN	NaN	NaN	NaN	NaN	NaN	NaN	NaN	NaN
O43159	O43159	Ribosomal RNA-processing protein 8	RRP8	23.1436	NaN	NaN	22.4483	22.1518	22.6299	22.3618	22.0194	22.237	NaN	NaN	22.5342	NaN	22.3412	NaN	21.9256	22.0017	22.5733	21.8672	NaN	4	NaN	NaN	1	2	1	1	1	1	NaN	NaN	1	NaN	1	NaN	1	1	1	1	NaN
O43169	O43169	Cytochrome b5 type B	CYB5B	26.6946	26.204	26.9083	25.9314	25.8024	26.5692	26.0197	26.3477	26.8304	25.4635	26.5573	26.6432	27.0202	26.9009	26.9973	26.8558	27.2692	26.2208	26.6406	26.3375	4	4	4	3	4	4	4	4	4	2	4	4	4	4	4	4	3	4	3	4
O43172-2;O43172	O43172-2;O43172	U4/U6 small nuclear ribonucleoprotein Prp4	PRPF4	26.0479	25.1828	25.1327	26.5098	25.8498	25.6154	25.5604	25.6157	26.1683	24.0283	25.2761	25.3489	25.2683	25.3053	25.1006	25.7699	26.1544	26.1618	24.1697	25.2682	11	5	7	11	10	6	9	9	9	1	10	9	5	10	8	11	12	10	3	9
O43175	O43175	D-3-phosphoglycerate dehydrogenase	PHGDH	NaN	28.2227	29.4346	28.0251	29.2702	28.729	29.1395	28.9317	25.5685	27.267	27.188	27.502	27.459	27.5973	28.0016	28.5404	26.0812	29.006	26.7388	27.4586	NaN	18	19	17	18	17	16	19	10	11	14	16	14	15	17	18	7	17	9	14
O43181	O43181	NADH dehydrogenase [ubiquinone] iron-sulfur protein 4, mitochondrial	NDUFS4	26.0235	25.8091	25.0718	25.7369	25.0999	24.781	25.2353	26.1359	25.409	23.954	25.6921	24.2489	25.7099	24.8155	NaN	25.4786	26.1557	25.4852	25.5932	25.4099	2	2	3	2	2	2	2	2	2	1	2	2	3	2	1	3	1	2	2	2
O43184-3;O43184-4;O43184-2;O43184	O43184-3;O43184-4;O43184-2;O43184	Disintegrin and metalloproteinase domain-containing protein 12	ADAM12	NaN	NaN	NaN	NaN	NaN	NaN	NaN	NaN	NaN	NaN	NaN	21.7695	NaN	NaN	NaN	NaN	NaN	NaN	NaN	NaN	NaN	NaN	NaN	NaN	NaN	NaN	NaN	NaN	NaN	NaN	NaN	1	NaN	NaN	NaN	NaN	NaN	NaN	NaN	NaN
O43237;O43237-2	O43237;O43237-2	Cytoplasmic dynein 1 light intermediate chain 2	DYNC1LI2	26.8326	26.6699	27.0147	26.4726	26.7777	26.8138	26.4989	26.7922	26.7085	25.0153	27.663	26.9078	26.9915	26.6195	27.0808	27.2403	26.1419	27.0959	26.1712	26.4742	13	13	13	12	10	16	9	13	11	4	14	11	12	11	16	16	10	14	7	10
O43240	O43240	Kallikrein-10	KLK10	NaN	NaN	NaN	22.4074	NaN	NaN	NaN	NaN	NaN	22.7752	24.9773	NaN	NaN	NaN	23.4628	NaN	22.1819	NaN	NaN	NaN	NaN	NaN	NaN	1	NaN	NaN	NaN	NaN	NaN	1	4	NaN	NaN	NaN	2	NaN	1	NaN	NaN	NaN
O43242	O43242	26S proteasome non-ATPase regulatory subunit 3	PSMD3	27.6188	27.6481	27.444	28.0993	28.0869	27.9968	27.4891	27.8245	27.809	26.6843	27.7973	27.7316	27.6509	27.732	27.9637	28.2329	27.7362	28.0633	27.574	27.7058	20	17	18	19	18	18	15	18	16	9	18	12	13	15	17	17	15	19	14	15
O43251-6;O43251-8;O43251-9;Q9NWB1-3;O43251-4;O43251-5;O43251-10;O43251-2;O43251;Q9NWB1-4;Q9NWB1-5;Q9NWB1;O43251-7;Q9NWB1-2;A6NFN3;A6NFN3-2;O43251-3	O43251-6;O43251-8;O43251-9;Q9NWB1-3;O43251-4;O43251-5;O43251-10;O43251-2;O43251;Q9NWB1-4;Q9NWB1-5;Q9NWB1;O43251-7;Q9NWB1-2	RNA binding protein fox-1 homolog 2;RNA binding protein fox-1 homolog 1	RBFOX2;RBFOX1	NaN	22.4552	NaN	22.3543	22.9344	23.4357	NaN	NaN	NaN	NaN	22.5443	21.9762	NaN	NaN	NaN	22.7561	21.965	22.6869	NaN	21.9135	NaN	1	NaN	1	3	3	1	NaN	NaN	NaN	1	1	NaN	NaN	1	1	1	2	NaN	1
O43252	O43252	Bifunctional 3-phosphoadenosine 5-phosphosulfate synthase 1;Sulfate adenylyltransferase;Adenylyl-sulfate kinase	PAPSS1	27.4607	26.6881	26.7259	26.4192	27.1835	26.3663	26.3962	28.1174	25.7493	25.3106	26.4037	27.1363	27.2307	28.9892	26.9286	27.2071	28.2961	26.5737	27.1993	27.9416	16	14	10	15	15	11	15	18	6	3	14	14	14	21	12	18	17	9	13	18
O43264;O43264-2	O43264;O43264-2	Centromere/kinetochore protein zw10 homolog	ZW10	25.0285	24.6566	24.7913	25.1224	24.5138	24.5902	24.5308	24.8191	23.9445	23.102	24.5021	24.2853	24.8481	24.131	24.2459	25.3359	24.2719	24.9589	23.25	25.5369	5	6	7	7	5	6	4	5	4	2	7	3	4	4	3	6	2	7	2	7
O43272;O43272-2;O43272-1	O43272;O43272-2;O43272-1	Proline dehydrogenase 1, mitochondrial	PRODH	23.5308	NaN	NaN	NaN	23.0186	NaN	NaN	NaN	28.0593	NaN	NaN	NaN	NaN	NaN	22.0677	NaN	NaN	NaN	NaN	NaN	3	NaN	NaN	NaN	4	NaN	NaN	NaN	17	NaN	NaN	NaN	NaN	NaN	1	NaN	NaN	NaN	NaN	NaN
O43278;O43278-2	O43278;O43278-2	Kunitz-type protease inhibitor 1	SPINT1	25.855	22.8028	26.8483	25.9443	26.5278	NaN	24.9755	26.9741	25.4327	NaN	24.7807	25.3319	25.363	26.0518	26.8097	25.2775	24.6656	25.9166	25.1217	25.486	14	1	13	12	13	NaN	9	14	7	NaN	7	7	6	8	13	8	6	10	4	9
O43290	O43290	U4/U6.U5 tri-snRNP-associated protein 1	SART1	25.36	25.3477	24.8481	26.03	25.1112	25.512	25.8009	25.7128	25.7302	NaN	25.2375	25.0842	24.8386	24.6787	24.474	26.0405	25.3498	25.72	24.8447	25.2844	6	9	6	12	9	10	10	10	11	NaN	9	8	8	6	7	11	9	14	4	7
O43291;O43291-2	O43291;O43291-2	Kunitz-type protease inhibitor 2	SPINT2	22.2552	22.5016	23.2221	27.5015	24.5004	NaN	23.0706	24.6913	23.632	NaN	NaN	NaN	22.0319	22.7427	24.6016	23.1513	22.0739	23.223	NaN	23.1045	1	1	3	6	4	NaN	2	5	3	NaN	NaN	NaN	1	2	4	2	1	3	NaN	4
O43292-2;O43292	O43292-2;O43292	Glycosylphosphatidylinositol anchor attachment 1 protein	GPAA1	24.5865	24.3063	25.036	25.0312	25.2891	24.9553	24.8566	24.8728	25.1305	NaN	24.8816	24.8471	24.6654	24.8769	24.8824	24.8601	NaN	24.7752	24.9275	24.8082	3	3	2	2	3	2	3	1	2	NaN	2	1	2	2	1	2	NaN	2	1	2
O43293;O43293-2	O43293;O43293-2	Death-associated protein kinase 3	DAPK3	21.3353	NaN	NaN	NaN	NaN	NaN	NaN	NaN	NaN	NaN	NaN	NaN	NaN	NaN	NaN	20.341	22.8833	NaN	NaN	20.8853	1	NaN	NaN	NaN	NaN	NaN	NaN	NaN	NaN	NaN	NaN	NaN	NaN	NaN	NaN	1	1	NaN	NaN	1
O43294;O43294-2	O43294;O43294-2	Transforming growth factor beta-1-induced transcript 1 protein	TGFB1I1	NaN	27.3786	21.8724	24.1821	25.1836	24.6765	26.3915	24.2723	24.1483	26.4723	24.5827	26.201	25.5219	22.7734	24.194	24.5741	NaN	23.4428	20.3593	25.9634	NaN	13	3	5	5	6	12	2	6	11	6	11	8	3	6	4	NaN	2	2	10
O43295;O43295-2;O43295-3	O43295;O43295-2;O43295-3	SLIT-ROBO Rho GTPase-activating protein 3	SRGAP3	NaN	NaN	21.5302	21.0579	NaN	NaN	21.0211	21.0151	NaN	NaN	21.2389	21.2078	21.3579	21.5478	NaN	21.4764	NaN	NaN	NaN	22.0293	NaN	NaN	1	1	1	NaN	2	1	NaN	NaN	2	1	1	2	1	1	2	NaN	NaN	2
O43301	O43301	Heat shock 70 kDa protein 12A	HSPA12A	NaN	24.1578	23.4636	23.7621	24.5505	25.4495	25.0897	25.0587	NaN	NaN	24.5265	26.4806	26.0287	23.604	24.867	25.9665	24.8796	24.0644	22.6909	23.7189	NaN	4	2	6	7	12	2	1	NaN	NaN	10	13	13	2	7	13	2	4	2	5
O43324;O43324-2	O43324;O43324-2	Eukaryotic translation elongation factor 1 epsilon-1	EEF1E1	25.6935	25.0499	25.4376	25.8925	25.7426	25.6197	25.2417	24.8807	26.2289	23.9151	25.007	25.1782	25.3128	25.0008	25.4772	25.4293	25.4533	25.4096	24.2728	25.3698	4	4	5	5	6	6	5	5	6	2	5	5	5	5	6	5	3	5	2	4
O43347	O43347	RNA-binding protein Musashi homolog 1	MSI1	NaN	NaN	NaN	22.9334	NaN	23.7961	NaN	23.0976	NaN	NaN	NaN	23.2713	NaN	NaN	22.8794	NaN	NaN	24.469	NaN	NaN	NaN	NaN	NaN	1	NaN	3	NaN	1	NaN	NaN	NaN	3	NaN	NaN	2	NaN	NaN	4	NaN	NaN
O43353;O43353-2	O43353;O43353-2	Receptor-interacting serine/threonine-protein kinase 2	RIPK2	21.4741	NaN	NaN	NaN	21.3725	NaN	NaN	22.2328	25.5282	NaN	NaN	21.6391	21.5714	NaN	NaN	21.8031	NaN	21.4344	NaN	21.2409	1	NaN	NaN	NaN	1	NaN	NaN	1	5	NaN	NaN	1	1	NaN	NaN	1	NaN	1	NaN	1
O43390;O43390-3	O43390;O43390-3	Heterogeneous nuclear ribonucleoprotein R	HNRNPR	29.3261	29.3473	29.6094	29.9792	29.4417	29.8706	29.0168	29.5068	28.984	28.0608	29.655	29.7608	29.4292	29.3175	29.1332	29.7243	29.5666	29.846	29.015	29.6659	23	24	24	24	24	24	21	24	24	13	24	24	24	24	24	25	23	25	22	25
O43390-2;O43390-4	O43390-2;O43390-4	Heterogeneous nuclear ribonucleoprotein R	HNRNPR	22.5312	NaN	23.2411	22.7981	NaN	23.7093	NaN	22.9536	NaN	NaN	22.8185	23.4057	23.4108	23.7764	23.2481	22.8632	24.1438	23.6329	NaN	23.6794	1	NaN	1	1	NaN	1	1	1	NaN	NaN	1	1	1	1	1	1	1	1	NaN	1
O43395;O43395-3	O43395	U4/U6 small nuclear ribonucleoprotein Prp3	PRPF3	24.4212	24.111	23.6942	25.8351	24.8709	24.5155	23.9254	24.5039	24.8584	26.2914	23.5091	23.9053	23.1371	23.8134	23.9532	24.8183	25.1722	24.5171	23.6672	23.8181	6	6	3	8	7	5	4	5	4	2	2	3	1	3	4	6	6	3	4	3
O43396	O43396	Thioredoxin-like protein 1	TXNL1	27.8719	27.444	27.0368	28.3078	27.6446	28.5569	27.4819	28.2923	27.7724	27.0671	27.6116	27.6337	27.8022	27.9523	28.0799	28.0754	27.9242	27.9398	27.3954	28.1785	12	11	10	12	12	13	11	12	12	9	9	12	11	12	13	12	11	11	10	12
O43399;O43399-5;O43399-7	O43399;O43399-5;O43399-7	Tumor protein D54	TPD52L2	27.96	28.0536	28.0192	28.1259	27.9784	28.3245	28.135	28.2043	28.4656	27.3975	28.2677	27.6515	27.7657	27.6867	27.8447	27.9228	26.9259	27.7745	27.9976	27.8505	13	12	12	12	11	12	12	12	12	8	12	10	11	11	9	13	9	8	11	10
O43399-2;O43399-4;O43399-3;O43399-6	O43399-2;O43399-4;O43399-3;O43399-6	Tumor protein D54	TPD52L2	22.6801	23.2116	23.7938	23.0034	22.4653	23.2544	23.1814	22.7852	22.7225	NaN	23.3333	22.1598	22.4904	22.5221	22.761	22.5652	22.1187	22.5551	22.6659	22.5905	1	1	1	1	1	1	1	1	1	NaN	1	1	1	1	1	1	1	1	1	1
O43414-3;O43414-2;O43414	O43414-3;O43414-2;O43414	ERI1 exoribonuclease 3	ERI3	23.7109	23.3044	24.6264	25.385	24.194	23.6984	23.6271	24.1643	23.4786	NaN	23.5539	23.5148	22.8283	23.136	24.2763	23.3979	23.8357	23.6268	23.2628	23.5588	3	3	3	4	3	4	3	4	2	NaN	3	2	1	2	3	2	1	2	2	4
O43432-4;O43432;O43432-3	O43432-4;O43432;O43432-3	Eukaryotic translation initiation factor 4 gamma 3	EIF4G3	21.676	21.2625	21.2006	20.3195	21.3632	20.5647	20.5459	21.8449	NaN	NaN	20.7011	21.5027	21.0613	20.8326	NaN	21.9919	20.5766	21.7923	NaN	22.1041	1	1	1	1	1	1	1	2	NaN	NaN	2	1	1	1	NaN	2	1	2	NaN	1
O43447;O43447-2	O43447;O43447-2	Peptidyl-prolyl cis-trans isomerase H	PPIH	27.5818	28.0056	27.9264	29.6487	29.2554	27.9804	27.7718	28.1012	27.7929	26.404	27.5596	27.4849	27.3253	27.703	27.6828	28.0923	27.884	28.1043	27.7829	28.0909	3	3	3	5	5	4	4	3	4	2	3	3	4	4	3	3	3	2	3	3
O43451	O43451	Maltase-glucoamylase, intestinal;Maltase;Glucoamylase	MGAM	NaN	NaN	NaN	NaN	NaN	NaN	NaN	NaN	NaN	NaN	NaN	NaN	NaN	21.3496	NaN	NaN	NaN	NaN	NaN	NaN	NaN	NaN	NaN	NaN	NaN	NaN	NaN	NaN	NaN	NaN	NaN	NaN	NaN	1	NaN	NaN	NaN	NaN	NaN	NaN
O43464-2;O43464-3;O43464;O43464-4;P83110-2;P83110	O43464-2;O43464-3;O43464;O43464-4	Serine protease HTRA2, mitochondrial	HTRA2	23.1827	NaN	24.0419	25.8118	22.7961	23.1838	23.3277	22.6733	22.686	NaN	24.4515	22.7312	22.5865	23.3768	22.9655	23.2753	22.9166	23.0821	22.2407	22.8343	2	1	4	1	2	1	3	2	1	NaN	2	2	2	1	1	3	1	2	1	2
O43488	O43488	Aflatoxin B1 aldehyde reductase member 2	AKR7A2	29.0523	27.3465	28.4079	27.8803	27.2167	27.898	27.3943	27.1955	26.9426	26.4703	28.111	27.5789	27.5741	27.7776	27.0773	27.3593	27.4406	27.5128	26.8502	27.244	11	7	11	11	9	11	8	9	7	7	11	8	10	7	10	8	7	8	7	9
O43490-2;O43490;O43490-4;O43490-7;O43490-5;O43490-3;O43490-6	O43490-2;O43490;O43490-4;O43490-7;O43490-5;O43490-3;O43490-6	Prominin-1	PROM1	NaN	NaN	26.7935	NaN	25.7651	NaN	NaN	22.7415	29.4471	NaN	NaN	24.6569	26.0693	24.684	29.4296	25.1969	23.2073	23.8609	24.1555	27.774	NaN	NaN	17	NaN	12	NaN	NaN	2	20	NaN	NaN	7	15	7	21	13	3	4	3	19
O43491;O43491-3;O43491-2	O43491;O43491-3;O43491-2	Band 4.1-like protein 2	EPB41L2	25.5169	27.6897	28.0868	27.3197	27.7163	28.5408	27.5513	27.644	26.2623	26.7352	26.3085	28.9542	27.8563	27.4096	27.0497	27.8124	27.0345	28.17	27.5121	26.9419	11	22	31	24	27	32	23	22	14	13	10	30	28	20	20	22	16	29	17	17
O43491-4	O43491-4	Band 4.1-like protein 2	EPB41L2	NaN	NaN	23.7453	22.9713	23.0675	23.8715	NaN	23.5772	NaN	NaN	NaN	24.3447	23.131	23.1972	22.9183	23.6776	23.1276	23.7616	23.503	22.5567	NaN	NaN	1	1	1	1	1	1	1	NaN	NaN	1	1	1	1	1	1	1	1	1
O43493-4;O43493-2;O43493-5;O43493-3;O43493;O43493-6	O43493-4;O43493-2;O43493-5;O43493-3;O43493;O43493-6	Trans-Golgi network integral membrane protein 2	TGOLN2	23.4021	24.1658	24.4089	24.5391	25.4863	23.7164	24.2044	23.4251	24.1768	23.4712	24.0074	24.2493	23.9668	24.0305	24.8145	24.9369	23.4594	23.8746	25.0981	24.4986	7	6	7	7	7	4	7	7	7	1	7	4	7	7	6	7	6	7	5	7
O43504	O43504	Ragulator complex protein LAMTOR5	LAMTOR5	23.2204	23.3454	25.6326	23.8993	23.4229	23.1094	23.1206	23.4665	23.91	NaN	23.2076	22.9677	23.3738	23.5205	23.0711	23.0484	NaN	23.1467	23.431	22.9817	3	3	3	2	3	1	2	2	1	NaN	2	2	2	2	1	3	NaN	2	1	2
O43508-2;O75888-5;O75888-4;O75888;O75888-2;O75888-3	O43508-2;O75888-5;O75888-4;O75888;O75888-2;O75888-3	Tumor necrosis factor ligand superfamily member 13	TNFSF13	NaN	NaN	21.1712	NaN	NaN	NaN	NaN	NaN	NaN	23.3616	NaN	NaN	22.0074	NaN	22.0602	20.6672	NaN	NaN	NaN	NaN	1	NaN	1	NaN	NaN	NaN	NaN	NaN	NaN	1	NaN	NaN	1	NaN	2	1	NaN	NaN	NaN	NaN
O43520;Q8TF62	O43520	Phospholipid-transporting ATPase IC	ATP8B1	22.0585	NaN	NaN	NaN	NaN	NaN	NaN	NaN	20.7825	NaN	NaN	NaN	NaN	NaN	NaN	NaN	NaN	NaN	NaN	NaN	4	NaN	NaN	NaN	NaN	NaN	NaN	NaN	1	NaN	NaN	NaN	NaN	NaN	NaN	NaN	NaN	NaN	NaN	NaN
O43556;O43556-3;O43556-4	O43556;O43556-3;O43556-4	Epsilon-sarcoglycan	SGCE	NaN	NaN	NaN	NaN	NaN	23.0434	NaN	NaN	NaN	NaN	NaN	NaN	23.19	NaN	NaN	NaN	NaN	NaN	NaN	NaN	NaN	NaN	NaN	NaN	NaN	2	NaN	NaN	NaN	NaN	NaN	1	1	NaN	NaN	NaN	NaN	NaN	NaN	NaN
O43570-2;O43570	O43570-2;O43570	Carbonic anhydrase 12	CA12	24.4835	NaN	23.8589	24.0327	23.9903	NaN	25.0605	24.4098	25.7588	NaN	24.55	23.3162	24.2345	23.6772	24.3176	22.8303	23.1966	NaN	22.8661	23.7146	4	NaN	3	5	4	NaN	5	1	6	NaN	1	2	4	1	1	1	2	NaN	1	4
O43583	O43583	Density-regulated protein	DENR	24.3071	24.5936	24.2439	24.9683	24.2399	24.698	24.1651	24.465	23.6054	23.4322	24.9515	24.7568	24.4256	24.3215	23.9325	24.6822	24.546	24.9644	23.991	24.5633	6	5	4	6	3	5	3	3	3	1	5	5	3	3	2	5	4	5	2	3
O43592	O43592	Exportin-T	XPOT	25.8251	25.4615	24.7294	25.7701	25.732	25.8282	25.39	26.0882	25.1438	24.3741	24.4413	24.6694	22.879	25.0316	24.456	24.9814	25.6291	27.1541	23.7735	25.251	12	12	7	16	15	11	13	18	7	2	8	12	4	11	6	11	7	21	4	6
O43598;O43598-2	O43598;O43598-2	2-deoxynucleoside 5-phosphate N-hydrolase 1	DNPH1	27.3104	25.7709	25.899	25.0194	25.6161	26.4881	25.7051	25.0755	26.1825	25.5541	25.6214	25.8349	25.8387	25.4219	26.1318	25.9378	26.9118	25.4636	26.7834	24.7448	5	5	5	5	5	5	4	5	5	1	5	5	4	5	5	5	3	4	4	3
O43615	O43615	Mitochondrial import inner membrane translocase subunit TIM44	TIMM44	25.9757	25.0088	24.7922	25.7894	24.6913	24.5188	26.0328	24.5337	25.2088	NaN	24.4067	24.8042	24.7734	24.1552	24.8307	24.9131	25.0851	25.1033	24.3463	25.2619	7	7	6	9	4	4	7	6	6	NaN	5	5	5	6	6	7	5	7	6	7
O43617;O43617-2	O43617;O43617-2	Trafficking protein particle complex subunit 3	TRAPPC3	23.8314	24.5713	23.4179	24.4554	23.8159	23.583	23.8398	23.8467	23.4788	NaN	23.6646	23.8243	24.1739	24.7449	24.1866	24.2325	25.6304	24.4524	23.7236	23.6242	3	4	3	4	2	1	3	3	2	NaN	2	3	5	3	5	4	4	2	1	2
O43633	O43633	Charged multivesicular body protein 2a	CHMP2A	22.4355	23.1079	23.2898	24.0532	23.2267	NaN	23.2643	23.1199	NaN	NaN	23.9024	23.5932	23.5723	23.9876	22.873	23.2683	23.6237	23.5336	NaN	23.7883	2	2	1	2	1	NaN	1	2	1	1	3	1	2	3	1	1	1	1	1	2
O43653	O43653	Prostate stem cell antigen	PSCA	22.355	NaN	NaN	NaN	NaN	NaN	NaN	NaN	NaN	NaN	23.0846	NaN	21.943	NaN	26.0489	NaN	NaN	NaN	NaN	NaN	1	NaN	NaN	NaN	NaN	NaN	NaN	NaN	NaN	NaN	2	NaN	1	NaN	3	NaN	NaN	NaN	NaN	NaN
O43657	O43657	Tetraspanin-6	TSPAN6	23.0847	22.7172	24.7699	22.8177	22.857	23.3316	NaN	22.5777	22.7717	NaN	NaN	NaN	23.0696	23.0203	22.7551	22.3894	NaN	23.0245	NaN	24.3085	2	1	3	1	2	2	NaN	1	1	NaN	NaN	NaN	1	2	2	2	1	1	NaN	3
O43660;O43660-2	O43660;O43660-2	Pleiotropic regulator 1	PLRG1	24.4149	24.2043	24.4862	24.8225	24.343	24.5743	23.5574	24.8393	24.8295	NaN	24.3528	24.1598	24.3312	24.1274	24.2253	24.5389	24.9803	25.0194	24.5253	24.5196	5	3	4	7	7	7	4	5	6	NaN	5	6	4	4	7	3	6	7	3	5
O43665-3;O43665-2;O43665	O43665-3;O43665-2;O43665	Regulator of G-protein signaling 10	RGS10	23.083	23.9687	22.9344	24.1025	24.7397	23.9766	24.1186	24.2159	23.6261	22.2929	23.0188	24.8542	23.9387	22.7559	23.3602	23.6825	23.7313	25.8074	24.9211	23.7557	3	4	1	4	6	5	5	5	2	1	2	5	5	1	2	5	3	7	5	5
O43670-2;O43670;O43670-4;O43670-3	O43670-2;O43670;O43670-4;O43670-3	BUB3-interacting and GLEBS motif-containing protein ZNF207	ZNF207	25.129	25.1041	24.7813	25.3879	25.2532	25.2053	24.7095	25.0519	25.4189	NaN	25.5618	25.5277	25.2114	25.2888	25.2466	25.4909	25.5467	25.7805	24.2719	25.5203	3	3	3	2	3	4	3	2	3	NaN	2	2	2	2	3	3	3	3	3	3
O43674-2;O43674	O43674-2;O43674	NADH dehydrogenase [ubiquinone] 1 beta subcomplex subunit 5, mitochondrial	NDUFB5	24.8981	NaN	23.9607	23.7807	23.014	NaN	22.94	22.847	23.3612	NaN	23.3483	22.2354	23.3351	22.7399	NaN	23.1591	24.4442	23.6205	NaN	22.8574	2	1	2	2	1	NaN	1	1	2	NaN	2	1	1	2	NaN	2	2	2	NaN	1
O43676	O43676	NADH dehydrogenase [ubiquinone] 1 beta subcomplex subunit 3	NDUFB3	24.6648	23.4598	23.5698	24.1536	23.689	23.4944	23.6029	23.7058	23.6501	NaN	23.5335	23.2249	24.2458	23.3382	22.96	23.6683	24.5099	23.6834	23.2866	23.5689	2	1	1	1	1	2	1	1	2	NaN	1	1	2	1	1	1	2	2	2	1
O43678;O43678-2	O43678;O43678-2	NADH dehydrogenase [ubiquinone] 1 alpha subcomplex subunit 2	NDUFA2	25.2318	24.4606	24.6745	24.8274	24.3239	24.0394	23.8951	24.863	24.4093	NaN	24.3522	24.0469	24.6937	24.3257	24.2956	24.6343	25.3577	24.7293	23.765	24.8085	2	2	2	2	2	2	2	2	2	NaN	2	2	2	2	2	2	2	2	1	2
O43681	O43681	ATPase ASNA1	ASNA1	26.6164	26.7953	26.2164	29.23	28.0805	28.09	26.9985	27.2346	27.3944	26.2654	26.9465	26.6306	27.128	26.955	26.7338	26.7332	26.6237	27.0887	27.0108	27.0136	10	11	10	14	11	11	12	11	11	7	11	11	10	10	8	9	8	11	8	12
O43684-2;O43684	O43684-2;O43684	Mitotic checkpoint protein BUB3	BUB3	27.0873	26.8702	27.1063	27.2873	27.1372	27.4404	26.8995	27.1551	27.1454	26.7199	27.287	27.334	26.9188	27.1913	27.1372	27.2517	27.6551	27.6903	26.8696	27.4097	11	10	11	9	10	9	10	9	10	7	10	10	10	9	9	11	10	9	5	9
O43688;O43688-2;O43688-3	O43688;O43688-2;O43688-3	Lipid phosphate phosphohydrolase 2	PPAP2C	NaN	NaN	NaN	NaN	NaN	NaN	NaN	22.2423	NaN	NaN	23.5271	24.2373	23.5773	24.0836	24.0763	24.7158	22.9254	24.5061	NaN	24.3673	1	NaN	NaN	NaN	NaN	NaN	NaN	1	NaN	NaN	3	3	3	3	3	3	2	2	NaN	3
O43707;O43707-2;O43707-3	O43707;O43707-2;O43707-3	Alpha-actinin-4	ACTN4	31.1291	32.5581	32.144	32.896	32.1579	31.9285	32.324	32.3849	31.4815	32.1258	32.1602	32.2234	32.0628	31.8328	31.521	31.7576	31.4916	31.7056	31.8491	32.0744	53	55	54	57	51	53	54	54	50	50	53	52	52	50	51	52	49	51	48	53
O43708;O43708-3;O43708-2	O43708;O43708-3;O43708-2	Maleylacetoacetate isomerase	GSTZ1	26.0323	23.8431	25.5924	24.6664	23.3784	23.6907	23.5823	23.946	24.7004	NaN	26.7389	25.1236	25.4548	24.5326	25.0783	24.2913	24.5437	25.3433	24.5914	25.6326	5	2	5	3	3	3	3	3	4	NaN	5	3	4	4	4	5	2	3	3	5
O43709;O43709-3	O43709;O43709-3	Probable 18S rRNA (guanine-N(7))-methyltransferase	WBSCR22	NaN	20.9409	NaN	21.2607	21.3721	20.6598	20.9793	20.554	20.7448	NaN	20.3619	20.9649	20.2671	20.909	20.7369	20.5718	20.8281	21.186	20.6506	20.4891	1	1	NaN	2	1	1	1	1	1	NaN	1	1	1	1	1	1	1	1	1	1
O43719	O43719	HIV Tat-specific factor 1	HTATSF1	24.102	24.3068	24.8325	25.4967	23.9257	24.0354	23.3956	24.8071	24.126	NaN	24.0099	24.2203	24.3801	24.7283	24.0881	25.1384	24.6724	24.0512	23.7502	24.3735	2	5	7	8	3	1	5	6	4	NaN	3	4	5	4	3	5	5	5	2	4
O43731;O43731-2	O43731;O43731-2	ER lumen protein-retaining receptor 3	KDELR3	21.5101	22.0927	21.1893	NaN	21.6467	NaN	21.7629	NaN	22.3123	NaN	21.3534	20.602	22.0561	21.9388	21.3077	21.6481	NaN	NaN	NaN	23.4548	1	1	1	NaN	1	NaN	1	1	1	NaN	1	1	1	1	1	1	NaN	NaN	NaN	1
Q15438-3;Q15438-2;Q15438;Q99418-2;O43739-2;Q99418;O43739;Q9UIA0	Q15438-3;Q15438-2;Q15438;Q99418-2;O43739-2;Q99418;O43739;Q9UIA0	Cytohesin-1;Cytohesin-2;Cytohesin-3;Cytohesin-4	CYTH1;CYTH2;CYTH3;CYTH4	NaN	NaN	NaN	21.2625	21.557	NaN	NaN	21.4686	NaN	NaN	NaN	21.4333	21.4261	NaN	NaN	21.4099	NaN	21.2923	NaN	NaN	NaN	NaN	NaN	1	1	NaN	NaN	1	NaN	NaN	NaN	1	1	NaN	NaN	1	NaN	1	NaN	NaN
O43741;O43741-2	O43741	5-AMP-activated protein kinase subunit beta-2	PRKAB2	NaN	NaN	NaN	22.532	NaN	NaN	22.7324	NaN	NaN	NaN	NaN	NaN	NaN	NaN	NaN	22.5652	22.6524	NaN	NaN	NaN	1	1	1	1	NaN	NaN	1	NaN	1	NaN	2	1	1	NaN	NaN	4	3	1	NaN	1
O43747;O43747-2	O43747;O43747-2	AP-1 complex subunit gamma-1	AP1G1	26.9467	26.4075	26.9038	26.4037	26.3948	26.2033	26.2915	26.6385	26.5207	25.5518	27.326	26.7473	27.22	26.9988	26.939	27.2064	26.7477	26.8021	26.615	26.5557	15	11	15	13	13	12	11	13	11	4	16	15	15	16	13	15	11	16	11	11
O43752;O43752-2	O43752;O43752-2	Syntaxin-6	STX6	23.9873	23.1371	23.6122	23.494	22.5837	23.7345	NaN	23.6224	23.7724	NaN	23.2123	24.1118	23.6686	23.2765	23.8537	24.3543	25.0533	23.8309	23.6288	23.842	5	1	1	3	1	2	NaN	1	1	NaN	2	2	1	2	2	2	3	2	2	2
O43760;O43760-2	O43760;O43760-2	Synaptogyrin-2	SYNGR2	26.2572	25.3273	25.8453	26.0935	26.668	23.632	25.7805	27.1665	27.1325	25.7094	26.3615	26.084	26.4974	26.3231	27.0635	26.5106	25.2339	25.5777	26.4548	26.6907	3	2	2	3	3	1	2	2	3	1	2	3	2	2	2	2	2	2	2	3
O43765	O43765	Small glutamine-rich tetratricopeptide repeat-containing protein alpha	SGTA	25.6932	25.5641	24.8616	25.459	25.256	25.6574	25.3411	25.6357	25.2045	23.3427	25.7731	25.4276	25.3206	25.6888	25.418	26.0945	25.4482	26.5226	25.7314	25.6241	8	7	8	6	6	7	6	6	7	1	7	7	8	5	6	8	7	8	4	8
O43768-2;O43768;O43768-9;O43768-3;O43768-4;O43768-6;O43768-5;O43768-7;O43768-8	O43768-2;O43768;O43768-9;O43768-3;O43768-4;O43768-6;O43768-5;O43768-7	Alpha-endosulfine	ENSA	23.3725	22.5641	22.1931	23.3464	22.6171	22.6886	22.3636	23.0389	22.3809	NaN	22.887	22.5805	22.805	22.367	22.9658	23.4265	23.2967	22.6449	22.4819	22.5775	1	1	1	1	1	2	1	2	1	NaN	1	1	1	1	2	2	1	1	1	1
O43772	O43772	Mitochondrial carnitine/acylcarnitine carrier protein	SLC25A20	26.7784	24.1993	23.2723	25.1018	24.2331	22.9265	24.0885	23.9261	25.0357	22.6039	23.7274	23.3875	24.351	24.5283	23.9931	23.8996	24.2437	22.9525	24.504	24.2844	8	3	3	7	4	1	3	3	4	1	3	2	4	4	3	2	3	1	4	5
O43776;O43776-2	O43776	Asparagine--tRNA ligase, cytoplasmic	NARS	29.469	28.2709	28.5498	29.1592	28.5172	29.0747	28.3465	29.1716	28.6438	27.9072	28.4066	28.4581	28.6587	28.6097	28.9009	28.651	28.9909	29.0165	28.6117	28.684	20	17	17	21	20	21	18	20	16	15	17	17	19	20	21	19	20	20	17	18
O43795-2;O43795	O43795-2;O43795	Unconventional myosin-Ib	MYO1B	26.2533	26.4068	21.3525	25.178	25.7275	26.7841	25.0473	24.9728	24.323	25.7138	NaN	25.9294	24.5886	27.3192	26.7948	25.4046	25.577	27.0386	21.835	25.4407	18	17	2	11	15	16	13	12	4	10	NaN	12	7	18	17	13	12	18	3	10
O43809	O43809	Cleavage and polyadenylation specificity factor subunit 5	NUDT21	26.8094	26.3587	26.8526	27.2042	26.8683	26.861	26.77	26.967	26.2424	23.6648	26.4282	26.9474	26.4212	26.369	26.6767	27.0954	26.9387	27.1975	26.695	26.6972	9	8	9	8	8	8	7	8	7	1	7	8	8	8	6	9	6	8	7	7
O43813	O43813	LanC-like protein 1	LANCL1	26.5961	25.807	26.654	26.9139	26.4403	27.2395	25.8626	25.7455	25.3497	25.5804	26.2835	26.8749	26.7117	26.3144	26.9649	26.8333	26.1172	26.1743	25.838	26.4123	9	8	9	11	10	10	8	6	7	3	10	10	10	7	10	10	6	9	6	8
O43815;O43815-2	O43815;O43815-2	Striatin	STRN	22.5414	23.0237	22.9774	23.2146	22.8916	23.1551	23.6561	23.564	22.649	NaN	22.9624	22.9297	22.8414	23.2684	22.7546	23.5347	22.7883	23.0515	NaN	23.008	4	3	3	2	4	1	3	3	3	NaN	2	3	3	3	2	3	1	2	NaN	2
O43818	O43818	U3 small nucleolar RNA-interacting protein 2	RRP9	24.4805	23.6511	24.3085	23.6113	23.3684	24.0816	24.2107	22.9671	24.2081	NaN	24.1045	23.9085	23.6486	22.7969	24.2151	24.343	23.6166	24.5404	22.6396	23.6206	4	2	4	3	2	5	5	4	6	NaN	3	3	3	4	2	4	5	6	1	2
O43819	O43819	Protein SCO2 homolog, mitochondrial	SCO2	23.3091	NaN	22.1879	NaN	NaN	NaN	22.1686	22.3027	23.0601	NaN	NaN	NaN	NaN	NaN	22.7906	NaN	23.6306	22.7733	NaN	NaN	2	NaN	2	NaN	NaN	NaN	1	2	1	NaN	NaN	NaN	NaN	NaN	1	1	2	2	NaN	NaN
O43823	O43823	A-kinase anchor protein 8	AKAP8	22.4336	22.8043	22.1005	24.0473	23.6896	23.2178	22.9005	22.4011	23.204	NaN	NaN	22.686	NaN	NaN	22.4865	22.4698	22.5812	22.9971	NaN	22.5297	3	3	1	4	4	2	1	1	3	NaN	NaN	2	NaN	NaN	1	1	3	3	NaN	3
O43824	O43824	Putative GTP-binding protein 6	GTPBP6	21.9608	NaN	NaN	NaN	NaN	NaN	NaN	NaN	NaN	NaN	21.5913	NaN	NaN	NaN	NaN	NaN	NaN	NaN	NaN	NaN	1	NaN	1	NaN	NaN	NaN	NaN	NaN	NaN	NaN	2	NaN	NaN	NaN	NaN	NaN	1	NaN	NaN	NaN
O43837;O43837-2;O43837-3	O43837;O43837-2	Isocitrate dehydrogenase [NAD] subunit beta, mitochondrial	IDH3B	27.4671	26.3219	27.3873	26.4853	25.8445	26.1358	26.1804	26.6594	26.0571	24.3589	25.9059	25.6981	26.3336	26.052	27.1429	26.0456	26.9048	26.2711	25.9891	26.7733	11	10	10	10	8	7	11	9	8	1	10	8	9	8	11	10	8	8	5	11
O43847;O43847-2	O43847;O43847-2	Nardilysin	NRD1	24.6963	25.7533	23.973	24.92	25.4324	24.6293	25.6547	25.4936	25.766	23.4846	24.3819	24.1533	24.847	24.7714	25.2809	25.7987	24.911	25.5759	24.98	25.2864	6	10	7	11	11	3	6	11	10	2	7	6	5	6	9	11	8	10	7	7
O43852-3;O43852;O43852-4;O43852-2;O43852-6;O43852-15;O43852-5;O43852-10;O43852-9;O43852-14;O43852-13;O43852-11;O43852-8;O43852-12;O43852-7	O43852-3;O43852;O43852-4;O43852-2;O43852-6;O43852-15;O43852-5;O43852-10	Calumenin	CALU	27.4484	28.9886	28.7078	28.4438	29.907	29.2673	28.7963	27.9162	28.6191	27.8844	27.8496	28.274	28.1014	27.4878	28.7201	28.7053	27.2742	27.866	28.9512	28.1514	12	13	13	12	13	13	14	12	13	10	12	15	14	13	12	13	9	10	9	12
O43865;O43865-2	O43865;O43865-2	Putative adenosylhomocysteinase 2	AHCYL1	27.9465	26.7099	27.9148	27.6852	26.5216	27.0698	27.1438	27.3673	27.4878	25.7147	27.9741	27.8002	27.2617	27.7798	27.2083	26.6473	27.6161	27.1317	27.1049	27.2239	14	10	11	14	7	10	7	10	12	4	11	11	9	11	8	11	11	8	10	10
O43866	O43866	CD5 antigen-like	CD5L	20.7094	24.644	24.0293	25.5621	24.5014	23.2306	23.9049	25.748	24.8098	28.454	22.7198	24.6914	24.8811	25.3869	24.1168	22.3711	24.1234	22.4725	26.4043	23.2728	1	3	5	7	6	2	4	7	6	8	2	7	5	5	6	2	2	1	6	2
O43913-2;O43913	O43913-2;O43913	Origin recognition complex subunit 5	ORC5	NaN	NaN	NaN	20.4528	20.0895	20.6232	NaN	19.3597	NaN	NaN	19.5243	19.8616	NaN	NaN	NaN	NaN	NaN	NaN	NaN	19.9321	NaN	NaN	NaN	1	1	1	NaN	1	NaN	NaN	1	1	NaN	NaN	NaN	NaN	1	NaN	NaN	1
O43914-3;O43914-2;O43914	O43914-3;O43914-2;O43914	TYRO protein tyrosine kinase-binding protein	TYROBP	NaN	NaN	NaN	NaN	22.7977	NaN	NaN	NaN	NaN	NaN	NaN	NaN	NaN	21.3311	NaN	NaN	NaN	NaN	21.8718	NaN	NaN	1	NaN	NaN	1	NaN	1	1	NaN	NaN	NaN	NaN	NaN	1	NaN	1	NaN	NaN	1	NaN
O43920	O43920	NADH dehydrogenase [ubiquinone] iron-sulfur protein 5	NDUFS5	26.3259	25.1937	25.049	25.5657	24.8816	24.7687	25.1822	25.6126	25.1204	NaN	24.9635	24.1623	25.6816	25.203	24.6059	25.6186	26.0495	25.6162	24.9646	25.653	4	4	4	4	3	3	3	4	4	NaN	4	4	4	4	3	4	4	4	2	4
O43924	O43924	Retinal rod rhodopsin-sensitive cGMP 3,5-cyclic phosphodiesterase subunit delta	PDE6D	22.5086	22.9819	23.6259	22.0794	23.5286	23.0981	22.3363	21.8945	22.745	NaN	23.353	23.0539	22.7963	22.3651	22.5197	22.8184	22.6573	22.3073	NaN	22.3958	2	2	3	1	3	1	1	1	1	NaN	3	2	1	2	1	2	2	1	NaN	1
O43927	O43927	C-X-C motif chemokine 13	CXCL13	NaN	21.2433	NaN	NaN	NaN	NaN	NaN	NaN	NaN	NaN	NaN	NaN	24.6599	NaN	NaN	NaN	NaN	NaN	NaN	NaN	NaN	1	NaN	NaN	NaN	NaN	NaN	NaN	NaN	NaN	NaN	NaN	2	NaN	NaN	NaN	NaN	NaN	NaN	NaN
O43929-2;O43929-3;O43929;CON__Q2YDI2	O43929-2;O43929-3;O43929;CON__Q2YDI2	Origin recognition complex subunit 4	ORC4	21.9077	NaN	NaN	23.0007	22.593	23.1546	22.2847	NaN	22.208	23.0525	NaN	NaN	NaN	NaN	22.3555	22.9358	22.3356	22.6152	21.5435	NaN	2	NaN	NaN	3	1	1	1	NaN	1	1	NaN	NaN	NaN	NaN	1	1	2	1	1	NaN
O43933-2;O43933	O43933-2;O43933	Peroxisome biogenesis factor 1	PEX1	23.4143	NaN	23.9295	22.3959	23.3013	NaN	NaN	NaN	23.4789	NaN	NaN	NaN	NaN	23.3683	23.1436	NaN	NaN	23.1377	NaN	NaN	1	NaN	1	1	2	NaN	NaN	NaN	1	NaN	NaN	NaN	NaN	1	1	NaN	NaN	1	NaN	NaN
O60216;Q9H4I0	O60216	Double-strand-break repair protein rad21 homolog	RAD21	25.0305	25.2723	25.6794	25.4121	25.3574	25.4665	25.7721	25.7275	25.0187	NaN	25.0296	25.3163	25.0149	25.1398	25.3754	24.8389	25.2788	25.7636	25.4607	25.2492	6	7	9	8	8	8	8	8	6	NaN	5	7	6	8	8	9	6	6	5	8
O60218	O60218	Aldo-keto reductase family 1 member B10	AKR1B10	NaN	NaN	NaN	NaN	NaN	NaN	20.3043	NaN	22.855	NaN	NaN	NaN	23.259	NaN	27.3692	NaN	NaN	NaN	NaN	20.4935	NaN	NaN	NaN	NaN	NaN	NaN	1	NaN	4	NaN	NaN	NaN	1	NaN	10	NaN	NaN	NaN	NaN	1
O60220	O60220	Mitochondrial import inner membrane translocase subunit Tim8 A	TIMM8A	25.2708	24.1665	24.5315	22.8324	23.7315	NaN	23.7184	NaN	NaN	NaN	NaN	NaN	NaN	NaN	23.1786	22.9013	24.6758	23.3042	NaN	22.9685	5	3	5	2	1	NaN	1	NaN	NaN	NaN	NaN	NaN	NaN	1	1	1	4	1	NaN	2
O60231	O60231	Putative pre-mRNA-splicing factor ATP-dependent RNA helicase DHX16	DHX16	NaN	21.7999	21.7499	22.1386	21.995	21.6865	22.3132	21.7981	NaN	NaN	NaN	21.6	21.669	NaN	NaN	21.8628	22.0388	21.4643	NaN	NaN	NaN	1	1	2	1	2	1	1	NaN	NaN	NaN	1	1	NaN	NaN	1	1	1	1	NaN
O60232	O60232	Sjoegren syndrome/scleroderma autoantigen 1	SSSCA1	23.0263	23.3625	24.4839	23.1439	NaN	22.3343	23.0168	22.5102	NaN	NaN	NaN	22.9128	NaN	22.7624	23.2689	23.2177	22.6395	22.5269	NaN	23.329	2	2	6	2	2	2	1	2	3	NaN	NaN	2	1	1	3	3	1	1	NaN	2
O60234	O60234	Glia maturation factor gamma	GMFG	24.7989	26.1964	24.5725	24.5088	24.6102	25.301	25.8693	25.1627	25.0688	25.006	24.8175	25.1044	25.5081	27.0877	24.4303	25.6825	23.8698	24.7994	25.7281	24.7964	2	6	2	3	4	2	5	6	3	3	2	3	4	7	3	5	2	2	5	3
O60237;O60237-4;O60237-2;O60237-5	O60237;O60237-4	Protein phosphatase 1 regulatory subunit 12B	PPP1R12B	23.3601	21.8599	NaN	NaN	22.6737	22.7935	23.1717	NaN	NaN	NaN	23.7142	NaN	23.9858	NaN	23.6563	23.7745	NaN	23.7512	NaN	NaN	1	1	NaN	NaN	2	3	2	NaN	NaN	NaN	1	NaN	1	NaN	1	2	NaN	2	NaN	1
O60238-2;O60238;Q12983	O60238-2;O60238;Q12983	BCL2/adenovirus E1B 19 kDa protein-interacting protein 3-like;BCL2/adenovirus E1B 19 kDa protein-interacting protein 3	BNIP3L;BNIP3	21.7764	NaN	NaN	21.276	NaN	21.4014	NaN	NaN	21.7999	NaN	23.0591	NaN	21.6352	22.1336	NaN	22.3324	22.3979	22.0036	NaN	22.7294	1	NaN	NaN	1	NaN	1	NaN	NaN	1	NaN	2	NaN	1	1	NaN	2	2	1	NaN	2
O60240	O60240	Perilipin-1	PLIN1	NaN	25.9145	NaN	NaN	NaN	NaN	NaN	NaN	NaN	NaN	NaN	NaN	NaN	NaN	NaN	NaN	NaN	NaN	NaN	NaN	NaN	9	NaN	NaN	NaN	NaN	NaN	NaN	NaN	NaN	NaN	NaN	NaN	NaN	NaN	NaN	NaN	NaN	NaN	NaN
O60245;O60245-2	O60245;O60245-2	Protocadherin-7	PCDH7	NaN	25.2039	NaN	NaN	24.7199	NaN	NaN	24.9714	24.805	NaN	NaN	24.3369	24.8189	NaN	24.8392	24.6691	25.1472	NaN	NaN	23.7568	NaN	2	NaN	NaN	2	NaN	NaN	2	1	NaN	NaN	1	1	NaN	4	2	1	NaN	NaN	3
O60256;O60256-3;O60256-2;O60256-4	O60256;O60256-3;O60256-2;O60256-4	Phosphoribosyl pyrophosphate synthase-associated protein 2	PRPSAP2	23.1371	23.992	23.277	23.3568	23.5558	23.4946	24.0981	24.2458	NaN	NaN	23.4653	23.4521	24.2197	24.2021	24.5995	23.3809	24.9213	24.359	24.1933	24.1254	3	5	2	4	4	3	2	4	NaN	NaN	2	2	3	4	4	3	4	6	3	1
O60264	O60264	SWI/SNF-related matrix-associated actin-dependent regulator of chromatin subfamily A member 5	SMARCA5	25.9839	26.2112	26.9642	27.2255	26.3231	26.8625	26.3564	27.1016	26.8856	NaN	25.7909	26.6454	25.5881	26.4334	26.3401	26.745	26.7197	27.1958	25.9477	26.1082	16	17	22	24	14	18	18	23	21	NaN	10	16	11	13	16	18	18	22	9	12
O60271-4;O60271-9;O60271-2;O60271;O60271-5;O60271-3;Q9UPT6	O60271-4;O60271-9;O60271-2;O60271;O60271-5;O60271-3	C-Jun-amino-terminal kinase-interacting protein 4	SPAG9	22.9311	23.9819	23.2901	NaN	23.5105	22.8938	23.5834	24.2056	26.6717	23.0681	23.5147	23.2419	23.7126	23.09	23.189	23.5892	23.3038	23.9473	21.5355	23.9971	2	8	2	2	4	2	5	6	16	1	4	3	8	3	3	6	2	7	1	5
O60282;O60282-2	O60282;O60282-2	Kinesin heavy chain isoform 5C	KIF5C	22.7208	NaN	22.8066	NaN	22.5164	22.571	NaN	NaN	NaN	NaN	NaN	NaN	NaN	NaN	22.4097	NaN	NaN	22.4632	NaN	NaN	1	NaN	1	NaN	2	2	NaN	NaN	NaN	NaN	1	NaN	NaN	NaN	1	NaN	NaN	1	NaN	1
O60287	O60287	Nucleolar pre-ribosomal-associated protein 1	URB1	20.1326	19.1803	NaN	19.057	NaN	19.3119	NaN	19.7731	20.3892	NaN	NaN	NaN	NaN	NaN	NaN	19.4663	NaN	19.9345	NaN	NaN	1	1	NaN	2	1	1	NaN	1	1	NaN	1	NaN	NaN	NaN	NaN	1	NaN	1	NaN	1
O60291-4;O60291;O60291-3;O60291-2	O60291-4;O60291;O60291-3;O60291-2	E3 ubiquitin-protein ligase MGRN1	MGRN1	21.2402	21.1188	21.4912	21.6288	21.7089	NaN	NaN	NaN	NaN	NaN	21.279	NaN	NaN	NaN	NaN	NaN	NaN	21.3644	21.9822	NaN	1	1	2	1	1	NaN	NaN	NaN	NaN	NaN	1	NaN	NaN	NaN	NaN	NaN	NaN	1	1	NaN
O60292	O60292	Signal-induced proliferation-associated 1-like protein 3	SIPA1L3	NaN	NaN	NaN	25.1728	NaN	NaN	NaN	NaN	NaN	NaN	NaN	NaN	NaN	NaN	NaN	NaN	NaN	NaN	NaN	NaN	NaN	NaN	NaN	8	NaN	NaN	NaN	NaN	NaN	NaN	NaN	NaN	NaN	NaN	NaN	NaN	NaN	NaN	NaN	NaN
O60306	O60306	Intron-binding protein aquarius	AQR	24.1092	23.946	23.2614	23.4211	24.1688	24.1828	24.0297	23.8311	23.7936	NaN	23.9649	23.59	24.2394	23.9275	24.715	24.1112	23.9788	24.3988	23.5356	24.0888	7	6	2	5	5	7	5	5	4	NaN	6	5	5	5	7	9	7	6	1	3
O60313;O60313-2	O60313;O60313-2	Dynamin-like 120 kDa protein, mitochondrial;Dynamin-like 120 kDa protein, form S1	OPA1	28.052	26.9008	26.6576	27.9726	25.4632	26.7379	27.0036	26.281	26.3615	23.4594	27.0978	26.4009	26.4602	26.8104	26.5126	26.3775	26.5138	26.8943	26.1508	25.7672	23	15	21	21	12	16	17	12	14	1	19	17	14	12	15	12	15	17	6	8
O60331-4;O60331;O60331-2;O60331-3	O60331-4;O60331;O60331-2;O60331-3	Phosphatidylinositol 4-phosphate 5-kinase type-1 gamma	PIP5K1C	NaN	21.4407	NaN	NaN	NaN	NaN	NaN	NaN	NaN	NaN	NaN	NaN	NaN	NaN	NaN	NaN	NaN	20.535	NaN	NaN	NaN	1	NaN	NaN	NaN	NaN	NaN	NaN	NaN	NaN	NaN	NaN	NaN	NaN	NaN	NaN	1	1	NaN	NaN
O60341;O60341-2	O60341;O60341-2	Lysine-specific histone demethylase 1A	KDM1A	24.2657	24.2436	24.8394	25.9166	25.4384	25.8264	23.9922	25.2834	24.8018	NaN	25.0224	24.7816	23.9426	24.9562	25.5384	25.4616	24.9675	25.8419	25.0177	24.6704	6	2	6	14	7	10	3	10	7	NaN	5	9	3	9	7	9	8	11	2	6
O60343-2;O60343-3;O60343	O60343-2;O60343-3;O60343	TBC1 domain family member 4	TBC1D4	22.1472	NaN	22.6782	NaN	22.8471	23.7973	NaN	NaN	23.5236	24.3012	NaN	NaN	23.4048	22.7135	24.1368	22.9528	NaN	22.9744	22.9491	23.3192	1	NaN	1	NaN	3	6	NaN	NaN	1	1	NaN	NaN	3	2	4	3	NaN	2	1	4
O60427-2;O60427	O60427-2;O60427	Fatty acid desaturase 1	FADS1	NaN	NaN	NaN	20.0862	20.9054	20.1075	NaN	21.5689	NaN	NaN	NaN	NaN	NaN	19.7024	NaN	21.5957	NaN	NaN	NaN	NaN	NaN	1	NaN	1	1	1	NaN	1	NaN	NaN	NaN	NaN	NaN	1	NaN	1	NaN	1	NaN	NaN
O60437	O60437	Periplakin	PPL	26.981	25.3353	28.956	25.874	26.856	26.721	27.4562	27.8601	22.9919	22.9982	30.4376	26.3093	26.4436	24.9309	29.8084	22.3762	27.1789	27.7758	26.9199	26.0566	32	12	51	20	29	17	28	31	2	4	58	16	24	10	57	3	26	34	22	17
O60443;O60443-2;O60443-3	O60443	Non-syndromic hearing impairment protein 5	DFNA5	NaN	23.2373	NaN	22.3023	22.9867	23.2898	23.3768	22.6039	22.2349	NaN	22.1473	22.0327	23.3066	22.6439	22.7003	NaN	NaN	NaN	NaN	NaN	1	3	NaN	2	2	3	4	1	1	NaN	1	1	4	3	1	NaN	NaN	NaN	NaN	NaN
O60449;O60449-2;O60449-3	O60449;O60449-2;O60449-3	Lymphocyte antigen 75	LY75	28.0913	24.0755	NaN	24.5048	26.5829	NaN	NaN	24.6181	26.3397	NaN	24.5632	24.7459	26.5448	26.4989	NaN	25.2413	27.946	25.3036	NaN	24.201	17	1	NaN	3	6	NaN	NaN	3	7	NaN	4	3	6	6	NaN	4	13	4	NaN	4
O60462-4;O60462-5;O60462-2;O60462-3;O60462;O60462-6	O60462-4;O60462-5;O60462-2;O60462-3;O60462;O60462-6	Neuropilin-2	NRP2	NaN	NaN	23.3688	NaN	23.5568	23.9688	22.6575	NaN	NaN	23.4161	23.7857	NaN	22.8469	NaN	24.5188	NaN	NaN	21.7542	NaN	22.3207	NaN	NaN	3	NaN	3	3	3	NaN	NaN	3	3	1	1	NaN	5	NaN	NaN	1	NaN	2
O60476	O60476	Mannosyl-oligosaccharide 1,2-alpha-mannosidase IB	MAN1A2	23.6436	21.4929	21.4431	22.071	22.6832	NaN	21.6054	21.478	NaN	NaN	22.0211	NaN	NaN	NaN	21.1777	21.3994	NaN	NaN	NaN	21.9465	5	1	2	2	1	NaN	1	1	NaN	NaN	1	NaN	NaN	1	1	1	NaN	NaN	NaN	1
O60487	O60487	Myelin protein zero-like protein 2	MPZL2	NaN	NaN	22.5426	NaN	NaN	NaN	NaN	NaN	NaN	NaN	NaN	21.9589	22.7959	NaN	NaN	22.2556	21.4769	21.1925	NaN	22.6318	NaN	NaN	1	NaN	NaN	NaN	NaN	NaN	NaN	NaN	NaN	1	1	NaN	1	1	1	1	NaN	1
O60488-2;O60488	O60488-2;O60488	Long-chain-fatty-acid--CoA ligase 4	ACSL4	25.3872	26.0348	26.8667	26.0301	25.8551	25.817	26.0771	25.6497	26.8226	25.3125	26.4183	26.638	28.3108	26.6576	28.584	27.3631	27.1058	25.3439	26.2129	27.0105	7	9	15	8	9	8	15	8	15	4	15	17	22	18	24	21	16	8	6	16
O60493;O60493-2;O60493-4;O60493-3	O60493;O60493-2;O60493-4	Sorting nexin-3	SNX3	25.4033	25.9013	25.0622	25.0912	25.6771	25.2973	25.6235	25.8749	26.0288	25.4276	24.9521	25.6297	25.4745	25.9356	25.1054	25.5524	24.8982	25.3729	25.7846	25.0756	5	5	5	4	4	4	5	4	4	3	5	5	4	4	5	5	4	5	4	4
O60499;O60499-2	O60499;O60499-2	Syntaxin-10	STX10	23.2959	NaN	NaN	23.6899	23.2922	NaN	23.0713	NaN	NaN	NaN	NaN	NaN	NaN	NaN	23.5843	NaN	NaN	NaN	NaN	NaN	2	NaN	NaN	3	1	NaN	2	NaN	NaN	NaN	NaN	NaN	NaN	NaN	1	NaN	1	NaN	NaN	NaN
O60502-4;O60502;O60502-2;O60502-3	O60502-4;O60502;O60502-2;O60502-3	Protein O-GlcNAcase	MGEA5	23.8076	24.4812	24.5066	27.4182	24.9436	23.7054	24.7962	24.7158	24.3768	24.5128	25.4834	24.6439	24.5264	24.668	24.1596	24.6716	23.4741	26.0136	24.7447	23.0977	2	7	5	15	8	5	9	12	5	1	10	8	7	8	4	9	5	14	5	4
O60504;O60504-2	O60504;O60504-2	Vinexin	SORBS3	NaN	24.9031	23.1966	23.4411	24.0622	24.813	24.3371	23.0918	23.7382	24.158	24.5502	25.6707	24.7435	22.7945	23.6453	23.9722	NaN	23.5913	23.5164	23.1782	1	4	1	4	4	6	5	2	4	5	3	6	7	1	5	4	NaN	2	2	3
O60506;O60506-2;O60506-3;O60506-4;O60506-5	O60506;O60506-2;O60506-3;O60506-4;O60506-5	Heterogeneous nuclear ribonucleoprotein Q	SYNCRIP	28.5393	28.8584	28.6395	29.4151	28.6181	28.6502	28.7608	28.8516	28.7929	28.0445	28.2253	28.4639	28.2356	28.1892	27.8625	28.698	28.5965	29.1186	27.9617	28.6154	15	14	14	16	15	13	14	15	15	9	13	13	12	12	15	15	13	15	11	15
O60508	O60508	Pre-mRNA-processing factor 17	CDC40	22.7637	22.7763	22.2917	22.6563	22.619	22.921	22.2455	22.6549	22.5224	NaN	21.7774	22.7164	22.847	22.4992	NaN	21.9995	22.731	22.9182	NaN	22.8237	2	1	2	3	2	3	1	3	3	NaN	1	1	2	1	NaN	3	1	4	1	2
O60513	O60513	Beta-1,4-galactosyltransferase 4;N-acetyllactosamine synthase;Lactotriaosylceramide beta-1,4-galactosyltransferase	B4GALT4	NaN	21.2672	NaN	21.0613	21.6255	21.3752	NaN	NaN	NaN	21.404	NaN	NaN	NaN	NaN	NaN	NaN	NaN	21.0655	NaN	NaN	NaN	1	NaN	1	1	1	NaN	NaN	NaN	1	NaN	NaN	NaN	NaN	NaN	NaN	NaN	1	NaN	NaN
O60518	O60518	Ran-binding protein 6	RANBP6	NaN	21.4216	NaN	21.7603	NaN	NaN	NaN	NaN	NaN	NaN	NaN	NaN	NaN	NaN	NaN	NaN	NaN	NaN	NaN	NaN	NaN	1	NaN	2	NaN	NaN	NaN	NaN	NaN	NaN	1	NaN	NaN	NaN	NaN	NaN	NaN	NaN	NaN	1
O60524-4;O60524-5;O60524-3;O60524;O60524-2	O60524-4;O60524-5;O60524-3;O60524	Nuclear export mediator factor NEMF	NEMF	22.4411	22.5478	NaN	22.1289	22.4884	22.8287	22.6216	NaN	22.7908	NaN	22.6113	22.8837	NaN	NaN	22.4401	NaN	22.2681	NaN	22.5792	22.6079	3	1	NaN	2	2	2	1	NaN	1	NaN	1	2	NaN	NaN	1	NaN	2	1	2	2
O60547	O60547	GDP-mannose 4,6 dehydratase	GMDS	28.0225	25.1136	26.0991	25.4937	25.5512	24.5085	26.6998	25.4826	25.3265	23.2157	26.3089	26.2736	26.2875	26.9876	23.4138	26.4139	25.6665	26.7808	24.9795	27.6635	13	7	10	11	8	4	7	8	7	3	10	8	11	10	2	10	8	12	3	13
O60563	O60563	Cyclin-T1	CCNT1	21.2007	NaN	NaN	NaN	NaN	NaN	NaN	21.8936	NaN	NaN	NaN	NaN	NaN	NaN	NaN	NaN	21.8479	22.0536	NaN	NaN	1	NaN	NaN	NaN	NaN	NaN	NaN	1	NaN	NaN	NaN	NaN	NaN	NaN	NaN	NaN	1	1	NaN	NaN
O60568	O60568	Procollagen-lysine,2-oxoglutarate 5-dioxygenase 3	PLOD3	26.0082	26.6136	25.7845	26.6505	27.2854	26.4568	26.8411	26.4715	26.3463	26.8762	25.7814	25.7489	25.6428	25.9428	26.2309	26.1804	25.3828	26.1839	26.189	26.0234	12	17	8	15	19	15	16	13	12	11	10	10	11	10	13	16	6	12	9	12
O60573;O60573-2	O60573;O60573-2	Eukaryotic translation initiation factor 4E type 2	EIF4E2	23.2443	23.1259	23.0663	22.6408	22.9049	23.2169	23.0115	22.9204	23.0913	NaN	22.9772	23.1237	23.29	22.8038	23.3692	23.4321	23.0584	23.6937	NaN	22.8447	4	2	2	3	2	2	2	2	2	NaN	2	1	1	1	3	3	2	4	NaN	1
O60603	O60603	Toll-like receptor 2	TLR2	NaN	20.2561	NaN	20.2489	21.1901	NaN	21.199	20.6015	NaN	NaN	21.0418	NaN	20.0738	NaN	NaN	20.2413	NaN	NaN	NaN	NaN	NaN	1	NaN	1	1	NaN	1	1	NaN	NaN	1	NaN	1	NaN	NaN	1	NaN	NaN	1	NaN
O60609-2;O60609	O60609-2;O60609	GDNF family receptor alpha-3	GFRA3	NaN	NaN	NaN	NaN	NaN	NaN	NaN	NaN	NaN	NaN	24.2674	NaN	NaN	NaN	NaN	NaN	NaN	NaN	NaN	NaN	NaN	NaN	NaN	NaN	NaN	NaN	NaN	NaN	NaN	NaN	3	NaN	NaN	NaN	NaN	NaN	NaN	NaN	NaN	NaN
O60610-2;O60610-3;O60610	O60610-2;O60610-3;O60610	Protein diaphanous homolog 1	DIAPH1	27.2628	26.6636	27.3602	26.7091	26.6351	25.5222	27.7193	27.5195	27.6293	22.9263	26.9349	26.7767	27.1477	27.0225	26.3488	27.0912	27.0745	26.9688	26.8003	26.7216	32	21	28	20	20	11	27	30	33	3	26	22	27	24	13	28	20	28	15	23
O60613;O60613-2	O60613;O60613-2	15 kDa selenoprotein	SEP15	25.3355	24.9431	24.4933	24.4643	24.5545	25.0287	25.092	24.679	24.4887	24.4972	24.7694	25.2419	25.1069	25.0899	25.2119	25.6374	25.4044	25.2581	25.2912	25.6583	4	4	4	4	4	4	4	4	3	1	4	4	4	4	4	4	3	4	4	4
O60635	O60635	Tetraspanin-1	TSPAN1	26.8559	NaN	25.1048	NaN	25.7883	NaN	22.2851	22.3232	26.2627	NaN	24.6111	21.9752	22.8538	24.9996	25.5464	21.2309	26.6158	23.4362	NaN	NaN	1	NaN	1	NaN	1	NaN	1	1	1	NaN	1	1	1	1	1	1	1	1	NaN	NaN
O60636-2;O60636	O60636-2;O60636	Tetraspanin-2	TSPAN2	NaN	NaN	NaN	NaN	NaN	NaN	NaN	NaN	NaN	NaN	NaN	NaN	NaN	NaN	NaN	NaN	19.1787	NaN	NaN	NaN	NaN	NaN	NaN	1	NaN	NaN	NaN	NaN	NaN	NaN	NaN	NaN	NaN	NaN	NaN	NaN	1	NaN	NaN	NaN
O60645-2;O60645-3;O60645	O60645-2;O60645-3;O60645	Exocyst complex component 3	EXOC3	23.3239	23.5522	23.3719	23.7625	23.224	23.636	23.29	23.3083	23.3213	23.7777	23.8715	23.2613	23.7224	24.0423	23.5783	23.772	23.6241	23.4085	NaN	23.5467	2	2	4	4	2	2	2	2	1	1	5	3	3	3	4	6	1	5	1	5
O60664-4;O60664;O60664-3;O60664-2	O60664-4;O60664;O60664-3;O60664-2	Perilipin-3	PLIN3	28.2902	28.4162	27.5943	27.7349	28.4236	28.6512	28.1992	28.2275	28.0303	28.2057	29.271	28.9769	28.7365	28.9847	28.548	28.9221	27.9335	28.5075	28.7421	28.5542	14	13	12	15	15	14	16	14	15	12	14	14	15	16	14	16	13	14	15	16
O60684	O60684	Importin subunit alpha-7	KPNA6	25.9537	26.0833	26.3802	26.6915	26.0113	26.0147	26.2022	26.5908	25.4713	25.347	25.57	25.4747	25.46	25.827	25.5106	25.7559	26.0469	25.9016	25.2718	25.8719	10	11	9	11	8	8	9	10	6	2	9	5	9	9	9	10	9	9	6	10
O60687	O60687	Sushi repeat-containing protein SRPX2	SRPX2	NaN	23.2461	23.6189	NaN	22.9335	25.2921	23.0901	NaN	NaN	25.9861	21.9577	23.1753	23.3974	23.1434	22.971	22.4255	NaN	NaN	23.4669	23.3101	NaN	1	4	1	2	6	3	NaN	NaN	4	1	4	2	2	1	1	NaN	NaN	2	2
O60701;O60701-2;O60701-3	O60701;O60701-2;O60701-3	UDP-glucose 6-dehydrogenase	UGDH	28.2258	28.5728	28.6782	27.6303	28.6594	28.0315	27.9527	28.7035	30.2806	28.0648	27.9421	28.8706	29.9187	28.7159	28.7517	29.6091	29.7539	29.5437	28.9539	30.2389	24	24	23	20	22	22	22	24	24	15	22	22	24	23	24	25	23	26	21	26
O60711;O60711-2	O60711;O60711-2	Leupaxin	LPXN	NaN	24.0564	NaN	23.0589	23.6287	NaN	23.9155	24.0683	NaN	23.9088	NaN	23.3562	24.1286	NaN	NaN	23.3362	23.2521	NaN	24.727	22.4651	NaN	4	NaN	1	3	NaN	3	3	NaN	2	NaN	3	4	NaN	NaN	2	1	NaN	1	1
O60716-21;O60716-19;O60716-18;O60716-17;O60716-13;O60716-11;O60716-10;O60716-9;O60716-5;O60716-3;O60716-2;O60716;O60716-24;O60716-23;O60716-22;O60716-20;O60716-16;O60716-15;O60716-14;O60716-12;O60716-8;O60716-7;O60716-6;O60716-4;O60716-29;O60716-27;O60716-26;O60716-25;O60716-32;O60716-31;O60716-30;O60716-28	O60716-21;O60716-19;O60716-18;O60716-17;O60716-13;O60716-11;O60716-10;O60716-9;O60716-5;O60716-3;O60716-2;O60716;O60716-24;O60716-23;O60716-22;O60716-20;O60716-16;O60716-15;O60716-14;O60716-12;O60716-8;O60716-7;O60716-6;O60716-4;O60716-29;O60716-27;O60716-26;O60716-25;O60716-32;O60716-31;O60716-30;O60716-28	Catenin delta-1	CTNND1	29.0744	28.175	28.9869	28.5231	28.9219	28.6808	28.8391	28.283	28.4277	26.4541	28.6897	28.8219	28.7871	28.7158	28.6802	28.3674	29.0217	28.7242	27.3502	28.5139	26	23	26	28	27	24	26	24	22	8	25	25	24	25	26	24	24	24	12	24
O60739	O60739	Eukaryotic translation initiation factor 1b	EIF1B	22.1133	22.0583	NaN	22.402	21.666	22.1721	21.6508	NaN	21.9708	NaN	22.0949	NaN	21.9482	21.7865	21.8243	21.5217	NaN	21.4519	NaN	21.3889	2	1	NaN	2	1	1	2	1	1	NaN	1	NaN	1	1	1	1	NaN	1	NaN	2
O60749-2;O60749	O60749-2;O60749	Sorting nexin-2	SNX2	27.0796	27.5746	27.1141	26.5038	27.6786	27.2255	27.3317	27.7107	28.2014	26.7155	26.4248	27.2733	27.2408	27.4703	27.3332	27.3455	26.7381	27.2616	27.6147	27.2445	12	16	11	10	15	13	13	15	16	8	10	14	14	10	14	12	11	12	13	11
O60760	O60760	Hematopoietic prostaglandin D synthase	HPGDS	NaN	NaN	22.4089	NaN	NaN	NaN	NaN	NaN	21.6499	NaN	NaN	22.0576	NaN	NaN	NaN	NaN	NaN	NaN	NaN	NaN	NaN	NaN	2	NaN	NaN	NaN	NaN	NaN	1	NaN	NaN	1	NaN	NaN	NaN	NaN	NaN	NaN	NaN	NaN
O60762	O60762	Dolichol-phosphate mannosyltransferase subunit 1	DPM1	25.9645	25.9076	24.5635	25.7579	24.8172	25.3635	25.1975	25.4725	24.7709	23.8021	26.4685	24.8651	25.7374	25.0812	25.5421	25.9623	25.3956	25.4768	25.1051	25.9123	7	7	3	5	4	5	6	6	4	1	6	3	7	5	5	8	4	4	3	6
O60763;O60763-2	O60763;O60763-2	General vesicular transport factor p115	USO1	27.7564	28.1163	28.4497	27.6053	28.4123	27.5456	28.2268	28.1479	27.4207	27.7001	27.8278	27.8414	28.2038	27.837	27.5885	28.368	27.447	27.7167	28.0056	28.5253	24	25	26	22	24	20	27	26	20	11	24	24	23	20	19	26	18	22	21	25
O60783	O60783	28S ribosomal protein S14, mitochondrial	MRPS14	23.965	22.193	22.9058	23.4778	22.8852	NaN	22.6316	22.6937	23.0845	NaN	22.393	NaN	23.1216	NaN	22.5701	22.4092	23.3437	23.0767	NaN	22.6364	2	1	1	2	1	NaN	2	1	1	NaN	2	NaN	1	NaN	1	2	1	2	NaN	1
O60784;O60784-2;O60784-3;O60784-4	O60784;O60784-2;O60784-3;O60784-4	Target of Myb protein 1	TOM1	26.2181	26.1797	25.2292	25.0307	26.0445	25.4458	25.9892	25.9781	26.34	25.1765	26.9715	26.291	26.8479	26.8736	26.1186	26.5128	25.546	25.1502	26.086	26.7233	11	12	7	4	11	8	9	7	10	6	12	10	12	14	8	10	4	6	7	12
P62807;P57053;O60814;Q99880;Q99879;Q99877;P58876;Q96A08	P62807;P57053;O60814;Q99880;Q99879;Q99877;P58876	Histone H2B type 1-C/E/F/G/I;Histone H2B type F-S;Histone H2B type 1-K;Histone H2B type 1-L;Histone H2B type 1-M;Histone H2B type 1-N;Histone H2B type 1-D	HIST1H2BC;H2BFS;HIST1H2BK;HIST1H2BL;HIST1H2BM;HIST1H2BN;HIST1H2BD	31.7187	32.4648	32.2719	32.8194	32.0916	32.5707	32.3454	32.0587	31.9885	30.8368	32.0263	32.4199	32.0624	32.585	32.2498	32.1446	31.5947	32.2165	31.5916	31.9854	8	8	8	9	8	8	8	8	7	7	9	8	9	8	9	8	8	9	8	8
O60825-2;O60825;Q16875-3;Q16875-2;Q16875;Q16875-4;P16118-2;Q16877-2;Q16877-3;Q16877	O60825-2;O60825	6-phosphofructo-2-kinase/fructose-2,6-bisphosphatase 2;6-phosphofructo-2-kinase;Fructose-2,6-bisphosphatase	PFKFB2	26.0322	22.585	26.1628	22.5512	22.1176	20.4909	24.315	23.2482	22.7539	NaN	26.2398	NaN	25.3063	25.76	25.9223	27.4822	25.5661	22.8421	23.4593	27.4239	12	1	14	2	4	2	1	5	2	NaN	15	1	11	12	13	14	8	1	2	17
O60826	O60826	Coiled-coil domain-containing protein 22	CCDC22	22.5176	23.261	22.4328	23.0361	NaN	23.1098	23.0987	22.6465	22.7661	NaN	23.742	22.4026	22.7497	NaN	22.4206	23.32	NaN	23.0189	23.2042	22.3274	1	3	1	3	NaN	2	2	4	2	NaN	4	3	4	NaN	1	5	NaN	3	1	2
O60828-4;O60828-2;O60828;O60828-7;O60828-6;O60828-5;O60828-3;O60828-10;O60828-9;O60828-8	O60828-4;O60828-2;O60828;O60828-7;O60828-6;O60828-5;O60828-3;O60828-10;O60828-9;O60828-8	Polyglutamine-binding protein 1	PQBP1	23.3503	23.4779	23.4955	22.6775	23.8038	23.8396	23.4173	22.9368	22.9527	NaN	23.3697	23.5081	23.35	22.9125	22.837	23.7728	23.8815	23.7403	23.7543	23.0433	2	1	2	3	2	2	2	3	3	NaN	2	1	2	2	2	3	3	3	4	3
O60830;O60830-2	O60830;O60830-2	Mitochondrial import inner membrane translocase subunit Tim17-B	TIMM17B	NaN	NaN	22.1088	22.2806	NaN	NaN	NaN	22.3462	NaN	NaN	22.1577	NaN	NaN	NaN	NaN	NaN	22.4614	22.6129	NaN	NaN	NaN	NaN	1	1	NaN	NaN	NaN	1	NaN	NaN	1	NaN	NaN	NaN	NaN	NaN	1	1	NaN	NaN
O60831	O60831	PRA1 family protein 2	PRAF2	NaN	23.6918	23.0702	25.1957	24.0224	24.5161	23.87	23.6604	23.3913	23.4154	23.5799	23.2021	23.5185	22.822	23.8287	23.8491	23.1782	23.2479	23.7189	23.4443	NaN	2	1	3	3	3	3	3	2	1	2	2	1	2	1	2	1	2	1	2
O60832;O60832-2	O60832;O60832-2	H/ACA ribonucleoprotein complex subunit 4	DKC1	28.1194	26.2961	27.6558	27.9631	26.7582	27.1922	26.8924	26.7519	27.094	24.433	26.5772	27.1366	26.6726	26.9309	27.4065	26.8535	28.1287	27.6618	26.9374	27.097	19	13	18	15	16	14	13	14	17	2	16	11	13	16	12	13	17	17	8	15
O60841	O60841	Eukaryotic translation initiation factor 5B	EIF5B	26.9005	26.6224	25.5316	27.6913	26.9602	26.991	26.9474	25.9439	26.6012	24.8961	26.405	26.4245	26.1188	25.7204	26.1606	27.5324	26.7622	27.5211	26.0856	26.7604	16	15	10	24	16	16	16	16	12	5	14	14	11	12	12	21	17	21	7	17
O60861-2;O60861-1;O60861-4;O60861	O60861-2;O60861-1;O60861-4;O60861	Growth arrest-specific protein 7	GAS7	24.3277	24.9318	24.7613	25.2833	25.0895	24.9107	24.618	25.1287	24.9276	NaN	24.6953	24.8361	24.811	24.7279	24.8577	25.1916	NaN	25.2056	NaN	24.8428	1	1	1	1	1	1	1	1	1	NaN	1	1	1	1	1	1	NaN	1	NaN	1
O60869-2;O60869-3;O60869	O60869-2;O60869-3;O60869	Endothelial differentiation-related factor 1	EDF1	25.3519	25.4114	24.9593	25.0677	23.9743	24.1912	25.3312	25.0595	24.1448	24.1042	24.9941	24.4473	24.4774	24.6273	24.2217	24.8599	24.6421	25.4158	24.7679	24.1937	3	3	3	3	3	3	3	3	1	1	3	3	3	3	3	3	3	3	1	3
O60879-2;O60879-3;O60879	O60879-2;O60879-3;O60879	Protein diaphanous homolog 2	DIAPH2	22.5385	22.3993	22.4019	22.4983	22.0462	NaN	22.0519	22.776	22.5604	22.7235	22.466	21.9141	22.4587	22.4535	21.9928	22.2031	22.125	22.1075	22.3374	22.0892	3	1	1	4	1	NaN	1	2	2	1	1	1	1	1	1	1	3	4	2	2
O60884	O60884	DnaJ homolog subfamily A member 2	DNAJA2	26.5955	26.227	26.3774	26.1492	26.0783	26.6603	26.2638	26.4425	26.6707	25.5458	27.1525	26.3313	26.1248	26.1379	26.5467	26.7915	23.9911	26.8013	26.4671	25.8292	9	9	10	9	9	10	9	9	10	3	10	9	8	8	7	9	3	10	7	7
O60885;O60885-2;O60885-3	O60885;O60885-2;O60885-3	Bromodomain-containing protein 4	BRD4	23.2673	23.6046	24.3321	24.5574	24.4022	25.3032	23.6327	24.1702	23.4091	NaN	23.4196	23.8581	24.1874	24.2457	23.9945	23.5059	24.3102	23.8348	23.7666	23.9459	4	2	5	7	5	5	5	4	4	NaN	3	5	2	3	2	2	3	2	3	4
O60888-3;O60888;O60888-2	O60888-3;O60888;O60888-2	Protein CutA	CUTA	25.6984	25.8216	26.0078	26.2169	25.3175	25.4068	26.1728	25.7534	24.2935	24.0148	25.7653	25.066	25.3024	25.3415	26.2161	25.1416	24.9439	25.5975	25.4411	25.4706	4	4	4	3	4	4	4	4	3	2	4	4	4	4	4	4	2	3	3	4
O60906	O60906	Sphingomyelin phosphodiesterase 2	SMPD2	NaN	NaN	NaN	NaN	NaN	NaN	NaN	NaN	21.5227	NaN	NaN	NaN	21.7894	NaN	NaN	NaN	NaN	NaN	NaN	NaN	NaN	NaN	NaN	NaN	NaN	NaN	NaN	NaN	1	NaN	NaN	NaN	1	NaN	NaN	NaN	NaN	NaN	NaN	NaN
O60925	O60925	Prefoldin subunit 1	PFDN1	23.6394	23.9414	24.0293	24.5143	24.2453	24.1006	24.8038	24.6172	23.9639	NaN	23.9686	23.8844	23.7152	23.7894	24.0088	24.2854	23.9274	24.2819	24.5069	24.4839	3	2	3	3	3	3	3	3	3	NaN	1	4	2	1	3	3	3	3	2	3
O60927	O60927	Protein phosphatase 1 regulatory subunit 11	PPP1R11	22.9171	22.4538	23.5318	NaN	22.7242	NaN	23.0762	22.891	23.4203	NaN	23.2975	22.1696	22.9262	22.9578	22.5083	22.0993	NaN	21.776	22.7141	22.9116	2	1	1	NaN	1	NaN	1	1	2	NaN	1	2	2	1	2	1	1	1	2	1
O60934	O60934	Nibrin	NBN	23.8373	23.8357	24.9088	23.2782	23.951	23.8354	23.9211	23.9529	24.686	NaN	23.7356	23.8113	23.6466	23.6372	24.1135	23.874	23.8072	23.6167	23.7411	23.2823	5	3	9	3	7	6	5	3	9	NaN	2	3	2	1	3	4	2	5	2	2
O60936;O60936-3;O60936-1	O60936;O60936-3;O60936-1	Nucleolar protein 3	NOL3	22.8256	NaN	23.183	21.7372	21.8017	20.6742	21.5512	22.3176	21.4137	NaN	23.1771	NaN	22.347	21.7907	NaN	21.6387	NaN	21.8087	21.378	20.8042	2	NaN	2	1	1	1	1	2	1	NaN	2	NaN	1	2	NaN	1	NaN	1	1	1
O60941;O60941-7;O60941-6;O60941-3;O60941-4	O60941;O60941-7;O60941-6;O60941-3;O60941-4	Dystrobrevin beta	DTNB	NaN	22.4711	23.7953	22.7888	22.6627	23.2146	23.25	23.0079	23.41	NaN	23.4349	23.9267	24.5747	23.0508	22.4804	23.1869	22.7933	23.4164	22.1128	23.8813	NaN	1	5	1	2	1	1	2	1	NaN	3	6	8	2	2	2	3	2	1	5
O60942-3;O60942-4;O60942-2;O60942	O60942-3;O60942-4;O60942-2;O60942	mRNA-capping enzyme;Polynucleotide 5-triphosphatase;mRNA guanylyltransferase	RNGTT	NaN	19.8853	18.9961	20.542	NaN	19.9607	20.2397	NaN	19.897	NaN	NaN	19.6899	18.9751	NaN	NaN	20.1552	NaN	20.4205	NaN	19.6094	NaN	1	1	1	NaN	1	1	1	1	NaN	NaN	1	1	NaN	NaN	1	NaN	1	NaN	1
O75027;O75027-2;O75027-3	O75027;O75027-2;O75027-3	ATP-binding cassette sub-family B member 7, mitochondrial	ABCB7	22.997	22.5364	22.8147	24.0544	22.487	22.1241	22.6909	22.731	22.2807	NaN	23.9382	22.4482	22.6037	22.3744	22.6903	22.9476	22.6758	22.4192	21.7624	22.6247	5	2	2	5	2	2	2	1	1	NaN	3	2	1	1	1	1	2	1	1	2
O75044;P0DJJ0;P0DMP2;Q7Z6B7-2	O75044;P0DJJ0	SLIT-ROBO Rho GTPase-activating protein 2;SLIT-ROBO Rho GTPase-activating protein 2C	SRGAP2;SRGAP2C	NaN	23.1005	NaN	22.7538	22.1994	21.9539	22.6626	23.2411	22.431	NaN	22.2927	21.9447	22.1366	21.6565	22.2074	22.9179	21.9065	22.239	NaN	22.4278	NaN	3	NaN	3	2	3	2	3	2	NaN	1	2	1	1	1	3	2	3	NaN	1
O75054-2;O75054	O75054-2;O75054	Immunoglobulin superfamily member 3	IGSF3	NaN	NaN	NaN	NaN	NaN	NaN	NaN	NaN	20.6078	NaN	NaN	NaN	NaN	NaN	NaN	NaN	NaN	NaN	NaN	NaN	NaN	NaN	NaN	NaN	NaN	NaN	NaN	1	1	NaN	NaN	NaN	NaN	NaN	NaN	NaN	NaN	NaN	NaN	NaN
O75063	O75063	Glycosaminoglycan xylosylkinase	FAM20B	21.9791	NaN	NaN	NaN	NaN	NaN	NaN	20.8577	NaN	NaN	NaN	NaN	NaN	NaN	NaN	22.1043	NaN	NaN	NaN	NaN	2	1	NaN	NaN	2	1	NaN	1	NaN	NaN	1	1	NaN	NaN	NaN	2	NaN	NaN	NaN	NaN
O75083;O75083-3	O75083;O75083-3	WD repeat-containing protein 1	WDR1	29.2886	30.4819	30.0227	30.1529	29.7933	29.9871	30.4069	30.334	29.9044	30.5665	30.3406	29.9178	30.1194	30.222	29.5733	30.0001	29.9821	29.5844	30.0792	29.975	19	22	20	21	20	19	21	20	20	21	20	20	19	20	20	20	19	20	21	20
O75084;Q14332	O75084;Q14332	Frizzled-7;Frizzled-2	FZD7;FZD2	NaN	NaN	NaN	20.1846	NaN	NaN	NaN	NaN	NaN	NaN	NaN	NaN	NaN	NaN	NaN	NaN	NaN	NaN	NaN	NaN	NaN	NaN	NaN	1	NaN	NaN	NaN	NaN	NaN	NaN	NaN	NaN	NaN	NaN	NaN	NaN	NaN	NaN	NaN	NaN
O75096	O75096	Low-density lipoprotein receptor-related protein 4	LRP4	NaN	NaN	NaN	NaN	NaN	NaN	NaN	NaN	NaN	NaN	NaN	NaN	NaN	NaN	21.9173	21.3189	NaN	NaN	NaN	21.5124	NaN	NaN	NaN	NaN	NaN	NaN	NaN	NaN	NaN	NaN	NaN	NaN	NaN	NaN	1	1	NaN	NaN	NaN	3
O75110;O75110-2	O75110;O75110-2	Probable phospholipid-transporting ATPase IIA	ATP9A	NaN	NaN	22.121	22.3452	NaN	22.093	NaN	NaN	NaN	NaN	21.9596	NaN	22.3882	NaN	NaN	NaN	22.9368	NaN	22.7601	22.1625	NaN	NaN	2	3	NaN	1	NaN	1	NaN	NaN	1	NaN	1	NaN	NaN	NaN	2	NaN	2	1
O75116	O75116	Rho-associated protein kinase 2	ROCK2	23.8849	25.1757	26.0258	25.098	24.5167	25.0627	25.4152	24.6522	22.868	NaN	26.7484	25.8066	24.7443	24.2928	23.4078	25.4711	23.7852	25.0011	23.4051	24.8303	3	10	11	11	9	10	12	7	4	NaN	16	15	9	7	4	11	4	7	3	8
O75122-3;O75122	O75122-3;O75122	CLIP-associating protein 2	CLASP2	23.3673	22.3369	23.332	23.3894	23.1187	24	23.2904	23.5352	22.8098	25.7734	23.7391	22.7097	22.3714	22.6041	23.489	23.6047	22.9857	24.0652	23.1981	23.7798	2	3	2	4	4	2	6	2	5	1	2	5	3	2	1	4	4	8	2	5
O75131;Q86YQ8-2;Q9HCH3-2;Q8IYJ1;O95741;Q9UBL6-2;Q9HCH3;O95741-2;Q9UBL6	O75131	Copine-3	CPNE3	27.7489	27.4366	28.2973	27.5101	27.6739	27.2816	28.103	28.1038	28.3511	26.9803	27.3036	27.7825	27.4062	28.0388	27.8518	27.3289	27.3411	28.1455	27.7011	27.0605	14	13	13	13	14	9	14	14	15	7	13	11	11	12	14	11	11	13	11	11
O75143-3;O75143-2;O75143;O75143-5;O75143-4	O75143-3;O75143-2;O75143;O75143-5;O75143-4	Autophagy-related protein 13	ATG13	NaN	NaN	NaN	NaN	NaN	NaN	NaN	NaN	20.4444	NaN	NaN	NaN	NaN	NaN	NaN	NaN	NaN	NaN	NaN	NaN	NaN	NaN	NaN	NaN	NaN	NaN	NaN	NaN	1	NaN	NaN	NaN	NaN	NaN	1	NaN	NaN	NaN	NaN	NaN
O75146;O75146-2	O75146;O75146-2	Huntingtin-interacting protein 1-related protein	HIP1R	23.0307	22.8012	NaN	22.2683	21.9869	NaN	NaN	NaN	22.858	NaN	22.0583	22.4545	21.9594	NaN	NaN	22.7605	24.675	23.5302	22.4752	23.1719	3	1	NaN	2	1	NaN	NaN	NaN	2	NaN	1	3	1	1	NaN	2	6	5	2	3
O75147-2;O75147-1;O75147-4;O75147	O75147-2;O75147-1;O75147-4;O75147	Obscurin-like protein 1	OBSL1	21.8489	NaN	23.0478	23.3483	NaN	NaN	NaN	21.7319	22.2481	NaN	NaN	NaN	NaN	NaN	NaN	NaN	NaN	22.31	NaN	NaN	1	NaN	2	4	NaN	NaN	NaN	3	1	NaN	NaN	NaN	NaN	NaN	NaN	NaN	NaN	1	NaN	NaN
O75150-4;O75150;O75150-3	O75150-4;O75150;O75150-3	E3 ubiquitin-protein ligase BRE1B	RNF40	23.6204	22.7022	23.4028	25.2121	25.453	24.5748	23.0282	23.8662	23.3275	NaN	23.9356	23.7907	23.5812	23.8001	24.201	23.9063	23.9427	24.9933	23.2291	23.3301	1	2	1	6	3	2	1	2	2	NaN	1	2	1	2	3	2	1	4	1	3
O75151;Q9UPP1-5;Q9UPP1-4;Q9UPP1-3;Q9UPP1-2;Q9UPP1	O75151	Lysine-specific demethylase PHF2	PHF2	NaN	22.1677	22.5514	NaN	NaN	23.0111	22.5472	22.6154	NaN	NaN	22.7658	22.2499	NaN	NaN	22.8318	NaN	23.6717	NaN	22.7674	NaN	NaN	3	2	NaN	NaN	1	1	1	NaN	NaN	3	1	NaN	NaN	2	1	1	NaN	1	NaN
O75152	O75152	Zinc finger CCCH domain-containing protein 11A	ZC3H11A	NaN	NaN	21.9426	23.8064	22.8932	23.0237	22.8776	23.3834	22.6265	NaN	23.2856	23.6282	NaN	22.644	24.5788	24.9849	23.7735	23.5126	23.9504	25.1143	1	NaN	3	8	2	2	2	4	2	NaN	4	3	NaN	1	6	7	5	7	2	5
O75153	O75153	Clustered mitochondria protein homolog	CLUH	24.1967	22.8264	23.6402	26.9927	23.2922	NaN	23.3363	21.5609	23.7599	NaN	21.3492	21.5528	22.6163	NaN	21.5785	23.3961	22.5002	24.1965	NaN	23.02	8	2	1	17	3	NaN	2	1	6	NaN	1	2	2	NaN	1	3	3	9	NaN	2
O75155-2;O75155	O75155-2;O75155	Cullin-associated NEDD8-dissociated protein 2	CAND2	NaN	24.3891	NaN	19.1292	NaN	NaN	NaN	NaN	NaN	NaN	NaN	NaN	NaN	NaN	NaN	NaN	NaN	NaN	NaN	NaN	NaN	1	NaN	2	NaN	NaN	NaN	NaN	NaN	NaN	NaN	NaN	NaN	NaN	NaN	1	NaN	NaN	NaN	NaN
O75165	O75165	DnaJ homolog subfamily C member 13	DNAJC13	25.1367	25.8913	24.5796	26.0213	26.1023	25.2736	26.5626	26.1971	25.813	23.3707	24.5106	25.2715	25.5105	26.3518	25.4691	26.0396	24.3357	24.4429	25.861	25.2034	13	17	10	20	17	11	27	25	19	1	9	11	16	21	10	22	8	8	9	12
O75170-6;O75170-2;O75170-4;O75170-3;O75170-5;O75170	O75170-6;O75170-2;O75170-4;O75170-3;O75170-5;O75170	Serine/threonine-protein phosphatase 6 regulatory subunit 2	PPP6R2	NaN	21.8876	21.9862	NaN	22.1677	22.0666	NaN	22.8299	NaN	NaN	NaN	NaN	22.1222	21.7307	NaN	NaN	NaN	22.337	NaN	NaN	NaN	1	1	NaN	1	1	NaN	2	NaN	NaN	NaN	NaN	2	1	NaN	1	1	2	NaN	1
O75175-2;O75175;O75175-3	O75175-2;O75175	CCR4-NOT transcription complex subunit 3	CNOT3	NaN	22.4448	NaN	23.2818	22.4409	22.9325	22.5235	22.015	NaN	NaN	22.4277	22.2892	22.1897	NaN	NaN	22.2914	NaN	22.2577	NaN	22.0078	NaN	2	NaN	3	1	2	1	2	2	NaN	2	2	1	NaN	NaN	2	NaN	1	NaN	2
O75179-7;O75179-2;O75179;O75179-6;O75179-4;O75179-3;O75179-5;Q8IWZ3-5;Q8IWZ3-2;Q8IWZ3-3	O75179-7;O75179-2;O75179;O75179-6;O75179-4	Ankyrin repeat domain-containing protein 17	ANKRD17	22.9046	21.9971	22.0009	28.5033	23.3712	21.47	20.5655	23.3952	22.7189	NaN	NaN	21.5538	21.6521	25.3086	NaN	24.4951	24.0849	24.2847	NaN	25.4359	4	1	1	21	3	1	2	5	2	NaN	NaN	1	1	1	NaN	7	2	5	NaN	2
O75190-3;O75190;O75190-2;O75190-4;Q8WWF6	O75190-3;O75190;O75190-2;O75190-4	DnaJ homolog subfamily B member 6	DNAJB6	23.1675	23.5253	23.2016	23.5609	24.1944	24.4796	23.6093	23.2671	24.2694	22.368	23.7596	23.5261	23.1539	23.8375	23.3309	23.4696	23.6031	23.5452	23.4803	23.609	2	3	3	2	3	3	2	2	4	1	3	1	1	2	3	3	2	1	2	2
O75208;O75208-2	O75208	Ubiquinone biosynthesis protein COQ9, mitochondrial	COQ9	26.5527	22.5905	24.7874	24.6309	23.6389	23.5121	23.4863	23.6533	24.2117	NaN	24.0418	23.7831	23.6306	23.962	23.5564	24.1227	25.7325	23.7772	NaN	22.9999	5	2	4	4	3	3	3	3	4	NaN	3	2	3	1	3	2	5	3	NaN	1
O75223;O75223-3;O75223-2;O75223-4	O75223;O75223-3	Gamma-glutamylcyclotransferase	GGCT	27.4076	26.7035	27.1873	26.7082	26.5307	29.8222	25.7865	25.4106	26.42	24.4974	27.0729	27.5159	27.3079	27.4602	27.2651	27.81	27.0089	27.731	26.3526	26.8865	8	8	8	5	7	11	8	4	5	1	7	7	7	9	7	9	6	7	6	7
O75251;O75251-2	O75251;O75251-2	NADH dehydrogenase [ubiquinone] iron-sulfur protein 7, mitochondrial	NDUFS7	25.8933	25.0297	25.312	25.2793	24.4203	24.3988	24.9739	24.9785	24.5011	NaN	24.5937	24.191	24.7815	23.8356	24.1828	25.2086	25.5143	25.1212	24.9587	25.1284	4	3	4	3	3	3	4	3	3	NaN	3	2	4	3	2	4	3	4	3	4
O75264	O75264	Small integral membrane protein 24	SMIM24	NaN	NaN	NaN	NaN	NaN	NaN	NaN	NaN	NaN	NaN	24.5496	NaN	NaN	NaN	NaN	NaN	NaN	NaN	NaN	NaN	NaN	NaN	NaN	NaN	NaN	NaN	NaN	NaN	NaN	NaN	3	NaN	NaN	NaN	NaN	NaN	NaN	NaN	NaN	NaN
O75298-3;O75298;O75298-2	O75298-3;O75298;O75298-2	Reticulon-2	RTN2	NaN	NaN	NaN	22.4449	NaN	NaN	NaN	22.0459	NaN	NaN	22.4194	NaN	NaN	NaN	NaN	NaN	NaN	NaN	NaN	NaN	NaN	NaN	NaN	1	NaN	NaN	NaN	2	NaN	NaN	1	NaN	NaN	NaN	NaN	NaN	NaN	NaN	NaN	NaN
O75306-2;O75306	O75306-2;O75306	NADH dehydrogenase [ubiquinone] iron-sulfur protein 2, mitochondrial	NDUFS2	27.586	26.1988	26.8927	26.612	26.3016	26.3126	26.1433	26.873	26.7832	23.2925	25.8833	25.7456	26.5349	25.9523	25.8447	26.6164	27.318	26.2958	26.374	26.4155	11	9	10	10	9	9	10	10	11	1	8	5	10	8	8	12	10	10	9	11
O75309;O75309-4;O75309-2;O75309-3	O75309;O75309-4;O75309-2;O75309-3	Cadherin-16	CDH16	27.5762	NaN	NaN	NaN	NaN	NaN	NaN	NaN	NaN	NaN	22.895	NaN	NaN	NaN	NaN	NaN	NaN	NaN	NaN	NaN	10	NaN	NaN	NaN	NaN	NaN	NaN	NaN	NaN	NaN	1	NaN	NaN	NaN	NaN	NaN	NaN	NaN	NaN	NaN
O75312	O75312	Zinc finger protein ZPR1	ZPR1	23.4953	23.4849	24.6345	23.6583	23.8907	23.1381	23.2992	22.7868	22.9382	NaN	23.0496	22.7841	22.7615	22.3421	NaN	23.0524	23.4492	23.6262	22.6305	23.1295	3	3	8	4	5	1	2	4	1	NaN	3	4	2	3	NaN	3	4	3	2	1
O75323;O75323-2	O75323;O75323-2	Protein NipSnap homolog 2	GBAS	26.417	26.102	27.3073	26.7554	25.2755	26.024	25.8727	25.5339	26.7689	24.6271	25.8752	26.6357	26.226	26.3705	26.7231	26.0685	27.072	26.2767	26.0721	26.8145	7	5	8	5	4	4	3	5	4	2	6	7	7	6	7	5	7	6	3	7
O75326-2;O75326	O75326-2;O75326	Semaphorin-7A	SEMA7A	NaN	NaN	NaN	NaN	NaN	NaN	NaN	NaN	NaN	22.8733	NaN	NaN	NaN	NaN	NaN	NaN	23.6933	NaN	23.5011	NaN	NaN	NaN	NaN	NaN	NaN	NaN	NaN	NaN	NaN	1	NaN	1	NaN	NaN	NaN	NaN	1	NaN	1	NaN
O75339	O75339	Cartilage intermediate layer protein 1;Cartilage intermediate layer protein 1 C1;Cartilage intermediate layer protein 1 C2	CILP	21.8566	29.0797	23.331	20.9401	25.1765	NaN	22.8253	20.0426	24.6562	29.1551	24.5919	24.09	NaN	25.059	NaN	NaN	19.3749	19.6519	25.7754	24.3855	2	18	4	1	8	NaN	2	1	6	17	10	6	NaN	9	NaN	NaN	2	1	8	6
O75340-2;O75340;O75340-3	O75340-2;O75340	Programmed cell death protein 6	PDCD6	27.9571	26.8006	27.191	26.91	26.525	26.9347	27.0508	27.0214	26.5574	25.8658	26.6644	26.4716	27.0382	27.4725	27.185	26.8525	27.4369	26.8843	26.2851	26.673	8	7	7	9	8	7	9	7	5	5	6	7	6	6	7	8	6	8	5	6
O75347;O75347-2	O75347;O75347-2	Tubulin-specific chaperone A	TBCA	26.8704	25.9548	26.5733	26.1897	26.6641	26.628	26.3785	27.2266	26.9918	25.3531	26.4001	26.4557	26.7171	26.4892	26.5351	27.0041	26.6199	27.0101	26.4093	26.7995	9	7	9	9	8	8	5	7	8	3	7	8	9	6	7	8	8	8	7	9
O75348;O95670-2;O95670	O75348	V-type proton ATPase subunit G 1	ATP6V1G1	24.8156	24.7796	25.8165	24.6458	24.6	24.0623	25.5599	24.7744	25.1534	23.7118	25.3818	24.6077	24.958	25.0619	24.4591	24.8415	24.3918	24.675	25.0855	24.6576	4	4	4	3	4	3	4	3	3	2	4	3	4	3	3	4	3	4	3	3
O75351	O75351	Vacuolar protein sorting-associated protein 4B	VPS4B	26.3745	26.1548	26.1626	26.1907	26.3389	26.6487	25.8107	26.5862	26.3303	25.7347	26.5622	26.2098	26.4833	26.5182	26.6623	26.3213	26.4153	26.2865	26.2543	26.1419	10	8	6	8	10	12	11	10	10	4	9	11	9	11	11	8	8	8	7	7
O75352-2;O75352	O75352-2;O75352	Mannose-P-dolichol utilization defect 1 protein	MPDU1	23.3711	24.1505	22.7868	23.5564	24.068	23.6894	23.7915	23.6231	23.5191	23.1101	23.6681	23.304	24.0437	23.972	23.5205	24.2848	24.3515	23.637	24.0662	24.4168	3	3	2	2	3	3	2	2	2	1	2	2	3	3	2	3	2	2	3	2
O75355;O75355-2	O75355;O75355-2	Ectonucleoside triphosphate diphosphohydrolase 3	ENTPD3	NaN	NaN	NaN	NaN	NaN	NaN	NaN	21.6024	NaN	NaN	21.5181	23.8827	23.1273	23.2101	22.4341	23.3943	NaN	22.6001	NaN	23.6556	NaN	NaN	NaN	NaN	1	NaN	NaN	1	NaN	NaN	1	5	4	1	1	3	NaN	1	NaN	5
O75356	O75356	Ectonucleoside triphosphate diphosphohydrolase 5	ENTPD5	NaN	NaN	NaN	NaN	NaN	NaN	NaN	NaN	22.8184	NaN	NaN	NaN	NaN	NaN	NaN	NaN	NaN	NaN	NaN	NaN	NaN	NaN	NaN	NaN	NaN	NaN	NaN	NaN	2	NaN	NaN	NaN	NaN	NaN	NaN	NaN	NaN	NaN	NaN	NaN
O75362	O75362	Zinc finger protein 217	ZNF217	NaN	NaN	NaN	21.8215	NaN	NaN	NaN	NaN	20.694	NaN	NaN	NaN	NaN	NaN	NaN	NaN	NaN	NaN	NaN	NaN	NaN	NaN	NaN	1	NaN	NaN	NaN	NaN	1	NaN	NaN	NaN	NaN	NaN	NaN	NaN	NaN	NaN	NaN	NaN
O75363;O75363-2	O75363;O75363-2	Breast carcinoma-amplified sequence 1	BCAS1	24.2914	NaN	NaN	NaN	NaN	NaN	NaN	NaN	NaN	NaN	NaN	NaN	NaN	NaN	NaN	NaN	NaN	NaN	NaN	NaN	6	NaN	NaN	NaN	NaN	NaN	NaN	NaN	NaN	NaN	NaN	NaN	NaN	NaN	NaN	NaN	NaN	NaN	NaN	NaN
O75367-3;O75367	O75367-3;O75367	Core histone macro-H2A.1	H2AFY	29.3955	28.964	29.6861	29.2771	28.9664	29.6729	29.6327	29.497	30.0687	27.8346	29.5166	30.178	29.807	29.8848	30.1148	29.272	30.2701	29.7017	29.4534	29.9008	15	13	15	14	11	13	14	13	15	11	14	14	13	13	14	15	15	14	16	15
O75368	O75368	SH3 domain-binding glutamic acid-rich-like protein	SH3BGRL	27.1132	28.3398	27.4705	27.3319	27.7286	28.2214	27.341	27.9024	27.4535	27.3129	28.1486	28.173	28.0921	27.8536	27.5828	27.6901	27.4046	27.5234	27.3853	27.5879	6	7	7	7	7	7	7	7	5	4	7	7	7	6	7	7	6	6	6	6
O75369-2;O75369-9;O75369;O75369-6;O75369-3;O75369-7;O75369-5;O75369-4	O75369-2;O75369-9;O75369;O75369-6;O75369-3;O75369-7;O75369-5;O75369-4	Filamin-B	FLNB	30.6594	30.862	30.41	31.4198	30.1643	29.7379	30.8512	30.4516	31.3183	30.9121	30.8684	30.8524	30.6197	30.9578	30.1741	30.2405	30.2377	30.4698	30.3725	30.5108	98	95	88	103	85	73	97	87	100	76	99	96	89	97	82	90	77	88	74	85
O75376-2;O75376;O75376-3	O75376-2;O75376;O75376-3	Nuclear receptor corepressor 1	NCOR1	NaN	NaN	NaN	NaN	NaN	NaN	NaN	NaN	NaN	NaN	NaN	NaN	NaN	NaN	NaN	NaN	NaN	NaN	NaN	NaN	NaN	NaN	NaN	NaN	NaN	NaN	1	1	1	NaN	1	NaN	NaN	NaN	NaN	NaN	NaN	1	NaN	NaN
O75379-2;O75379	O75379-2;O75379	Vesicle-associated membrane protein 4	VAMP4	NaN	NaN	NaN	NaN	NaN	NaN	NaN	NaN	NaN	NaN	NaN	22.3002	NaN	NaN	22.9409	23.0722	NaN	NaN	NaN	NaN	1	1	NaN	NaN	NaN	NaN	NaN	NaN	NaN	NaN	1	2	NaN	NaN	2	2	1	NaN	NaN	NaN
O75380	O75380	NADH dehydrogenase [ubiquinone] iron-sulfur protein 6, mitochondrial	NDUFS6	25.5194	24.5023	24.541	25.3847	24.4844	23.8442	24.5851	25.3113	25.0289	NaN	24.847	24.2858	25.3482	24.461	24.0388	25.1393	25.7582	25.0849	24.1571	25.2922	4	3	3	4	2	3	3	3	3	NaN	2	2	3	3	1	3	2	4	2	3
O75381-2;O75381	O75381-2;O75381	Peroxisomal membrane protein PEX14	PEX14	22.6595	22.4619	23.863	23.8045	23.488	23.2703	22.3188	23.7172	22.0196	NaN	23.2019	22.8456	22.0154	22.0921	NaN	22.8023	22.6984	22.8031	23.2036	22.9778	2	2	5	4	2	1	2	5	2	1	1	1	2	1	NaN	1	2	2	2	2
O75382-4;O75382-3;O75382-2;O75382	O75382-4;O75382-3;O75382-2;O75382	Tripartite motif-containing protein 3	TRIM3	NaN	NaN	NaN	NaN	21.0348	NaN	NaN	NaN	21.7462	NaN	21.0996	NaN	NaN	22.5512	NaN	22.3671	20.9119	20.2919	NaN	22.1323	NaN	NaN	NaN	NaN	1	NaN	1	NaN	1	NaN	1	NaN	NaN	1	NaN	1	1	1	NaN	1
O75390	O75390	Citrate synthase, mitochondrial	CS	29.1652	28.9452	27.8711	29.1975	28.3191	28.2237	29.0632	28.6609	28.3928	27.8337	29.6843	29.1972	29.2033	29.1882	28.7138	28.9732	29.8185	29.4222	28.2804	29.5849	16	15	16	16	14	13	15	16	14	9	16	16	15	16	14	14	14	15	12	16
O75391	O75391	Sperm-associated antigen 7	SPAG7	21.4667	22.1783	21.5097	22.3134	22.4942	22.5507	21.7836	NaN	22.5291	NaN	21.835	21.9426	21.7567	22.0928	NaN	22.2772	NaN	22.4468	22.1291	NaN	2	1	1	1	1	1	1	NaN	1	NaN	1	2	1	1	NaN	2	NaN	2	1	NaN
O75396	O75396	Vesicle-trafficking protein SEC22b	SEC22B	27.4872	28.2035	27.872	28.1595	27.8222	27.8779	28.0584	27.4773	27.6058	27.1867	27.8058	27.4184	28.0448	27.7325	27.5222	28.2506	27.6116	27.612	27.6919	28.128	6	9	9	8	7	9	9	8	7	5	8	8	8	8	8	10	7	7	7	9
O75400-2;O75400-3;O75400;Q6NWY9-2;Q6NWY9-3;Q6NWY9	O75400-2;O75400-3;O75400	Pre-mRNA-processing factor 40 homolog A	PRPF40A	25.2905	25.1201	25.6257	25.3182	25.2218	25.6225	25.0752	25.1963	26.109	23.6573	25.3803	25.3283	25.0905	25.2755	25.182	25.4436	25.7679	25.7341	24.6841	25.3395	4	5	5	6	5	5	5	5	7	1	4	5	5	5	4	7	6	7	2	6
O75410-3;O75410-7;O75410;O75410-2;O75410-5;O75410-4;O75410-6;O75410-8	O75410-3;O75410-7;O75410;O75410-2;O75410-5;O75410-4;O75410-6	Transforming acidic coiled-coil-containing protein 1	TACC1	NaN	NaN	22.2132	22.3966	22.1275	NaN	21.9331	22.3216	NaN	NaN	22.7814	22.5692	22.5417	NaN	22.5251	22.5485	NaN	NaN	23.2915	21.9556	NaN	NaN	1	3	1	1	1	1	NaN	NaN	3	1	1	NaN	1	2	NaN	NaN	1	1
O75431;O75431-2	O75431;O75431-2	Metaxin-2	MTX2	26.7261	24.724	25.597	24.7919	25.0034	24.8876	26.1856	25.2818	24.9886	NaN	25.2645	25.5315	25.3597	24.9983	25.5689	25.5808	25.9932	25.6362	25.1864	25.5443	6	5	6	5	4	3	4	5	5	NaN	5	4	5	5	4	6	5	5	4	6
O75436;O75436-2	O75436;O75436-2	Vacuolar protein sorting-associated protein 26A	VPS26A	27.1063	26.6652	26.6811	26.6404	26.9601	26.7124	26.8544	26.936	27.5538	26.019	26.6917	26.7632	27.0764	27.0846	26.7641	27.0599	26.7362	26.7863	26.9448	26.7081	14	11	12	13	13	12	12	12	15	5	8	14	14	13	13	15	13	14	12	11
O75438;O75438-2	O75438;O75438-2	NADH dehydrogenase [ubiquinone] 1 beta subcomplex subunit 1	NDUFB1	25.1686	23.6224	24.1203	23.9561	23.8286	23.5979	23.7742	23.8722	23.8606	NaN	23.711	23.3729	24.5034	23.844	22.9927	24.2156	24.4222	24.1507	23.5467	24.1155	2	2	2	2	2	1	1	2	2	NaN	2	1	1	2	1	2	2	2	1	2
O75439	O75439	Mitochondrial-processing peptidase subunit beta	PMPCB	26.9663	25.1333	24.1065	26.0562	25.4685	25.5848	24.6478	25.3923	23.9072	NaN	25.2712	24.0426	24.1048	24.7598	24.6791	24.875	25.7644	25.886	NaN	25.1217	17	8	6	12	7	5	5	10	4	NaN	8	4	2	6	4	7	9	13	NaN	8
O75448-2;O75448	O75448-2;O75448	Mediator of RNA polymerase II transcription subunit 24	MED24	NaN	NaN	NaN	22.9623	NaN	NaN	NaN	23.3027	NaN	NaN	NaN	21.8544	NaN	23.2374	NaN	24.1178	NaN	23.2558	NaN	NaN	NaN	NaN	NaN	1	NaN	NaN	NaN	1	NaN	NaN	NaN	1	NaN	1	NaN	1	NaN	2	NaN	NaN
O75475;O75475-3;O75475-2	O75475;O75475-3;O75475-2	PC4 and SFRS1-interacting protein	PSIP1	25.5747	26.8002	26.9166	28.1924	26.8478	27.2278	27.2433	27.0199	26.1199	23.3226	26.4561	26.5859	25.8646	25.8034	26.2261	26.3938	26.3431	27.2243	25.6748	25.5773	8	11	10	15	13	12	12	13	10	3	7	10	7	8	9	9	13	10	8	10
O75477	O75477	Erlin-1	ERLIN1	24.2554	24.4111	24.5247	24.3985	24.7621	25.6051	24.5657	24.6619	23.9109	23.6003	24.564	25.9182	25.2109	25.3565	25.6955	24.8294	26.4443	25.355	24.6888	24.5953	4	3	4	5	4	5	4	3	3	1	4	6	5	7	5	4	6	6	4	4
O75487;O75487-2	O75487;O75487-2	Glypican-4;Secreted glypican-4	GPC4	NaN	24.3594	27.1833	25.073	23.4408	24.8888	23.7857	23.9609	23.7133	21.2305	23.8683	23.6458	23.3358	22.498	24.1893	23.7707	NaN	24.066	NaN	23.2907	NaN	4	11	8	5	3	6	6	3	1	3	2	2	2	7	2	NaN	4	NaN	2
O75489;O75489-2	O75489	NADH dehydrogenase [ubiquinone] iron-sulfur protein 3, mitochondrial	NDUFS3	27.4227	26.6901	26.9653	26.995	26.5168	26.7414	26.1809	27.1102	26.8046	24.1377	26.1957	26.2729	27.0246	26.5782	26.3613	26.9197	27.4838	26.8207	26.0601	27.0377	10	10	9	9	9	9	9	8	8	2	8	7	10	8	9	9	8	8	6	9
O75494-5;O75494-4;O75494-6;O75494-3;O75494-2;O75494;Q8WXF0	O75494-5;O75494-4;O75494-6;O75494-3;O75494-2;O75494	Serine/arginine-rich splicing factor 10	SRSF10	25.6382	25.3562	25.3213	25.8415	25.1999	25.7348	24.8132	25.7887	25.5204	23.6662	25.4403	25.7622	25.3433	25.6541	25.0518	25.8063	25.7802	25.8471	NaN	26.2166	3	3	4	5	4	4	3	5	3	1	4	3	3	4	3	4	3	4	NaN	4
O75503	O75503	Ceroid-lipofuscinosis neuronal protein 5	CLN5	23.1848	21.8759	25.7339	24.2678	21.8125	NaN	21.9395	22.6227	22.4106	NaN	22.1923	22.4213	23.6492	23.2522	23.8869	22.8107	23.2651	23.0582	23.5064	23.0658	3	2	5	5	1	NaN	1	1	1	NaN	1	1	3	1	4	2	2	1	1	1
O75506	O75506	Heat shock factor-binding protein 1	HSBP1	22.1735	22.2399	21.2471	22.3523	22.0502	21.7886	22.0096	22.7594	21.8973	21.7203	22.5774	21.801	21.8194	22.5613	21.6132	22.0838	21.217	22.8446	22.4317	22.1661	1	2	1	1	1	1	1	1	1	1	1	2	1	1	1	1	1	1	2	1
O75521-2;O75521	O75521-2;O75521	Enoyl-CoA delta isomerase 2, mitochondrial	ECI2	26.6406	24.4124	27.6954	22.2787	25.0844	26.1173	24.896	24.6424	24.4364	22.1773	25.2352	25.8478	27.5286	28.2631	25.0197	27.9615	26.1595	25.8446	24.4227	27.5769	10	4	11	3	4	9	8	6	3	2	6	9	11	11	7	10	10	9	3	12
O75531	O75531	Barrier-to-autointegration factor;Barrier-to-autointegration factor, N-terminally processed	BANF1	28.1155	28.4382	29.1938	28.9731	28.5182	28.7813	28.9356	28.5108	28.895	26.6897	28.4126	28.342	27.8226	27.7879	28.1977	27.745	28.5905	27.8849	28.1181	27.7718	8	9	9	9	8	8	9	8	8	5	8	8	9	7	8	8	6	8	5	7
O75533;O75533-2	O75533	Splicing factor 3B subunit 1	SF3B1	28.5926	28.4577	28.5969	29.4289	28.5661	28.7598	28.44	28.6354	28.7886	26.6033	28.6418	28.5702	28.1972	28.4643	28.655	29.0597	28.9385	29.0979	28.2874	28.699	39	36	39	43	38	38	36	36	40	12	37	34	37	36	33	37	35	41	26	39
O75534;O75534-2;O75534-4;O75534-3	O75534;O75534-2;O75534-4;O75534-3	Cold shock domain-containing protein E1	CSDE1	26.619	26.5388	25.8857	28.6574	26.3366	25.4221	26.4893	26.3531	26.5621	NaN	25.9892	26.2243	26.1961	26.2075	25.8744	26.4235	26.1857	26.9687	26.1607	25.8628	16	17	12	23	14	7	12	13	18	NaN	14	14	13	9	12	16	11	17	7	11
O75554-2;O75554	O75554-2;O75554	WW domain-binding protein 4	WBP4	28.0907	26.0509	26.2243	24.7447	26.7924	26.3467	24.9344	27.9957	NaN	NaN	26.8203	27.0269	26.2915	NaN	25.9098	28.0714	NaN	26.8368	NaN	NaN	1	1	1	2	1	1	1	1	NaN	NaN	1	1	1	NaN	1	1	NaN	1	NaN	NaN
O75556	O75556	Mammaglobin-B	SCGB2A1	25.6968	NaN	NaN	NaN	NaN	NaN	NaN	NaN	NaN	21.9578	27.0636	24.9933	27.1753	28.0002	24.6735	27.089	NaN	24.1129	NaN	27.3767	2	NaN	NaN	NaN	NaN	NaN	NaN	NaN	NaN	1	4	3	4	4	2	4	NaN	3	NaN	4
O75558	O75558	Syntaxin-11	STX11	NaN	NaN	NaN	NaN	NaN	NaN	NaN	NaN	NaN	NaN	NaN	NaN	NaN	22.2632	NaN	NaN	NaN	NaN	22.6981	NaN	NaN	NaN	NaN	NaN	NaN	NaN	NaN	NaN	NaN	NaN	NaN	NaN	NaN	1	NaN	NaN	NaN	NaN	3	1
O75569-3;O75569-2;O75569	O75569-3;O75569-2;O75569	Interferon-inducible double-stranded RNA-dependent protein kinase activator A	PRKRA	25.7157	25.7928	26.1472	26.3372	25.5397	26.4354	25.6099	25.1554	25.1593	24.7247	25.7866	26.258	25.8105	25.489	26.4119	26.5086	25.9245	25.9872	25.9164	26.4067	7	7	9	8	8	9	6	7	3	3	5	9	7	4	8	9	7	7	6	9
O75592-2;O75592	O75592-2;O75592	E3 ubiquitin-protein ligase MYCBP2	MYCBP2	NaN	20.3845	NaN	19.0721	19.6968	NaN	20.4136	NaN	NaN	NaN	NaN	NaN	19.923	NaN	NaN	NaN	NaN	NaN	19.7663	NaN	NaN	1	NaN	1	1	1	1	NaN	NaN	NaN	NaN	1	1	NaN	NaN	NaN	NaN	NaN	1	NaN
O75594	O75594	Peptidoglycan recognition protein 1	PGLYRP1	21.6039	NaN	NaN	NaN	NaN	NaN	NaN	22.2089	NaN	NaN	NaN	NaN	NaN	25.1457	NaN	23.7121	22.4547	NaN	23.086	NaN	1	NaN	NaN	NaN	NaN	NaN	NaN	1	NaN	1	NaN	NaN	NaN	2	NaN	3	1	NaN	1	NaN
O75607	O75607	Nucleoplasmin-3	NPM3	25.5432	23.1053	24.0563	23.3048	24.1526	24.5878	23.7868	22.931	25.6377	NaN	23.7479	25.0893	22.8171	23.8808	24.0699	25.1145	24.8211	27.3302	24.5542	24.8523	4	3	4	2	3	3	4	2	5	NaN	1	5	1	3	2	5	2	6	2	4
O75608;O75608-2	O75608;O75608-2	Acyl-protein thioesterase 1	LYPLA1	28.3733	26.7512	26.4939	26.6204	27.2899	26.5176	26.8387	26.9788	27.8159	26.5483	27.17	27.2465	27.4744	27.8072	27.5258	27.2714	27.5441	27.8533	26.3251	27.7402	9	6	6	5	7	5	7	6	7	5	5	7	8	9	7	8	3	7	5	8
O75610	O75610	Left-right determination factor 1	LEFTY1	21.7911	NaN	NaN	NaN	NaN	NaN	NaN	NaN	29.2107	NaN	NaN	NaN	NaN	26.6622	NaN	NaN	NaN	NaN	NaN	NaN	1	NaN	NaN	NaN	NaN	NaN	NaN	NaN	16	NaN	NaN	NaN	NaN	11	NaN	NaN	NaN	NaN	NaN	NaN
O75616	O75616	GTPase Era, mitochondrial	ERAL1	NaN	NaN	NaN	NaN	19.0525	NaN	NaN	NaN	NaN	NaN	NaN	NaN	NaN	NaN	19.0973	NaN	NaN	NaN	NaN	NaN	NaN	NaN	NaN	1	1	NaN	NaN	NaN	NaN	NaN	NaN	NaN	NaN	NaN	1	NaN	NaN	NaN	NaN	NaN
O75629	O75629	Protein CREG1	CREG1	21.7594	NaN	21.0664	21.8658	22.1705	20.665	NaN	NaN	NaN	22.3875	NaN	NaN	NaN	NaN	NaN	21.1236	23.4995	NaN	NaN	NaN	1	NaN	1	2	1	1	NaN	NaN	NaN	1	NaN	NaN	NaN	NaN	1	1	2	NaN	NaN	NaN
O75636-2;O75636	O75636-2;O75636	Ficolin-3	FCN3	NaN	NaN	NaN	NaN	NaN	NaN	NaN	NaN	NaN	22.6571	NaN	NaN	NaN	NaN	NaN	NaN	NaN	NaN	22.5234	NaN	NaN	NaN	NaN	NaN	NaN	NaN	NaN	NaN	NaN	1	NaN	NaN	NaN	NaN	NaN	NaN	NaN	NaN	1	NaN
O75643;O75643-2	O75643	U5 small nuclear ribonucleoprotein 200 kDa helicase	SNRNP200	28.797	28.8755	28.6764	29.5416	29.056	29.272	28.7666	28.9022	29.0712	27.5817	28.8249	28.8652	28.6248	28.8522	28.7203	29.0245	29.0459	29.3317	28.5855	28.828	56	59	60	67	61	66	66	63	66	15	59	64	52	55	56	65	51	64	38	62
O75663;O75663-2	O75663;O75663-2	TIP41-like protein	TIPRL	25.0492	25.0651	25.0481	25.5562	25.3222	25.4656	24.9046	25.2394	25.0413	23.958	24.5707	25.4398	24.9768	24.9486	25.1396	25.8526	25.0539	25.0595	25.1539	25.5904	8	5	8	8	8	8	7	7	7	3	5	8	5	6	5	9	3	8	3	8
O75665-3;O75665;O75665-2	O75665-3;O75665;O75665-2	Oral-facial-digital syndrome 1 protein	OFD1	24.1641	26.6162	26.4823	26.1371	25.7282	29.1569	24.2437	26.3876	NaN	NaN	31.0138	27.2552	NaN	26.54	26.7317	26.4479	25.9954	26.1466	25.6572	25.8397	3	1	1	2	1	1	1	1	NaN	NaN	3	3	NaN	2	2	1	2	2	1	2
O75674-3	O75674-3	TOM1-like protein 1	TOM1L1	NaN	NaN	NaN	NaN	NaN	NaN	NaN	NaN	NaN	NaN	21.2243	NaN	NaN	22.0861	NaN	NaN	23.8406	NaN	NaN	NaN	NaN	NaN	NaN	NaN	NaN	NaN	NaN	NaN	NaN	NaN	1	NaN	NaN	1	NaN	NaN	2	NaN	1	1
O75683	O75683	Surfeit locus protein 6	SURF6	23.2959	21.0389	22.1517	21.024	21.028	21.8734	21.4073	21.494	NaN	NaN	21.9334	22.3148	21.663	21.2028	NaN	22.4229	22.8858	23.3215	21.5517	22.8422	2	1	1	1	1	2	1	2	NaN	NaN	2	2	1	1	NaN	2	1	3	1	2
O75688;O75688-4;O75688-2;O75688-3;O75688-5	O75688;O75688-4;O75688-2;O75688-3;O75688-5	Protein phosphatase 1B	PPM1B	22.4049	22.5853	22.6939	23.5049	23.3462	22.862	22.5834	21.5246	21.721	22.9832	23.2893	22.1255	22.4708	22.6069	23.1019	22.9641	20.9233	22.5056	24.6786	23.3794	3	2	3	2	2	2	2	1	2	1	2	3	3	3	3	4	2	1	1	1
O75691	O75691	Small subunit processome component 20 homolog	UTP20	23.6512	23.017	23.9141	23.5009	NaN	23.2879	NaN	23.2829	23.9521	NaN	24.2706	24.3019	NaN	24.705	23.9982	23.0595	24.6477	25.7568	NaN	23.4492	5	2	1	5	NaN	3	2	2	1	NaN	4	1	NaN	2	1	2	1	7	NaN	2
O75694;O75694-2	O75694;O75694-2	Nuclear pore complex protein Nup155	NUP155	26.7603	26.3866	26.6882	27.0365	26.7303	26.7599	26.5508	26.6583	27.0269	23.642	26.1862	26.1512	26.3873	26.205	26.4434	26.4697	26.649	27.0107	25.8926	26.1373	18	18	19	23	19	20	17	19	18	2	14	19	15	14	14	21	15	23	10	15
O75695	O75695	Protein XRP2	RP2	22.728	23.5364	23.2284	22.5038	23.4031	23.253	23.5943	23.4677	NaN	23.6399	23.6532	23.3171	23.4665	24.3285	22.8947	23.0169	23.622	22.5382	23.4551	22.9215	1	4	2	3	3	3	2	4	NaN	2	3	3	4	4	1	3	2	2	3	2
O75717-2;O75717	O75717-2;O75717	WD repeat and HMG-box DNA-binding protein 1	WDHD1	19.5979	19.9169	NaN	20.867	20.3699	21.8094	21.0657	20.8409	20.7956	NaN	21.206	20.3407	NaN	NaN	NaN	21.7745	NaN	22.4097	NaN	20.0462	2	2	NaN	1	1	1	1	1	1	NaN	1	1	NaN	NaN	NaN	1	NaN	2	NaN	1
O75718	O75718	Cartilage-associated protein	CRTAP	21.58	25.5144	24.2427	24.9069	25.518	24.6181	23.7193	24.5092	23.605	25.7494	23.3531	22.9252	22.9835	23.2448	25.5273	25.1653	22.8215	23.259	23.3742	23.9241	1	6	5	6	7	5	3	4	3	3	4	2	2	2	6	5	2	3	1	4
O75746;O75746-2	O75746;O75746-2	Calcium-binding mitochondrial carrier protein Aralar1	SLC25A12	25.3302	25.4677	25.9373	25.2743	24.0361	24.3881	26.1802	24.5355	24.32	NaN	25.6564	25.8434	24.7183	NaN	25.0411	24.6196	24.0943	23.0973	22.7455	24.5803	12	10	12	13	3	6	11	6	4	NaN	12	11	5	NaN	8	3	4	2	1	6
O75764	O75764	Transcription elongation factor A protein 3	TCEA3	22.3612	NaN	21.8986	24.1987	21.7123	NaN	NaN	20.7603	21.8329	NaN	22.5015	22.3319	NaN	22.2749	NaN	21.182	NaN	NaN	NaN	21.0822	3	NaN	1	4	1	NaN	NaN	1	2	NaN	1	1	NaN	1	NaN	2	NaN	NaN	NaN	2
O75781;O75781-2	O75781;O75781-2	Paralemmin-1	PALM	NaN	23.3756	NaN	NaN	NaN	23.13	NaN	NaN	NaN	NaN	NaN	22.4768	NaN	NaN	22.9176	NaN	NaN	NaN	NaN	NaN	NaN	1	NaN	NaN	1	3	NaN	NaN	NaN	NaN	NaN	3	NaN	NaN	3	NaN	NaN	NaN	NaN	NaN
O75787-2;O75787	O75787-2;O75787	Renin receptor	ATP6AP2	22.6878	21.7069	24.145	22.0297	22.286	NaN	23.4041	22.7266	23.2863	NaN	22.4526	22.6219	22.6262	22.9193	23.2751	NaN	NaN	22.4274	22.8635	22.3602	1	1	2	1	1	NaN	1	2	2	NaN	2	1	1	1	1	NaN	1	1	1	1
O75792	O75792	Ribonuclease H2 subunit A	RNASEH2A	NaN	NaN	NaN	NaN	NaN	22.4754	NaN	NaN	NaN	NaN	NaN	NaN	NaN	NaN	NaN	NaN	NaN	NaN	NaN	NaN	NaN	NaN	NaN	NaN	NaN	2	NaN	NaN	NaN	NaN	NaN	NaN	NaN	NaN	NaN	NaN	NaN	NaN	NaN	NaN
O75794	O75794	Cell division cycle protein 123 homolog	CDC123	20.9315	20.4297	NaN	21.1526	21.6345	NaN	NaN	20.5741	NaN	NaN	NaN	NaN	NaN	NaN	NaN	NaN	NaN	20.8572	NaN	19.9887	1	1	NaN	2	1	NaN	NaN	1	NaN	NaN	NaN	NaN	NaN	NaN	NaN	1	NaN	1	NaN	1
O75818-2;O75818	O75818-2;O75818	Ribonuclease P protein subunit p40	RPP40	21.9091	NaN	21.3379	21.7362	21.5428	21.3548	21.5963	NaN	22.0473	NaN	NaN	21.5518	20.9752	NaN	NaN	21.6247	NaN	21.6201	NaN	NaN	1	NaN	2	1	1	1	1	NaN	1	NaN	NaN	1	1	NaN	NaN	1	NaN	2	NaN	NaN
O75821	O75821	Eukaryotic translation initiation factor 3 subunit G	EIF3G	25.3172	25.6041	25.3498	26.0521	26.0759	26.3637	25.6891	25.3104	25.6419	NaN	25.5234	25.445	25.6543	25.1832	26.0607	25.8062	25.6817	26.3051	25.5751	25.6862	7	6	6	8	9	7	8	4	7	2	6	6	5	6	6	7	6	8	6	7
O75822;O75822-2;O75822-3	O75822;O75822-2;O75822-3	Eukaryotic translation initiation factor 3 subunit J	EIF3J	25.9249	25.7816	25.8328	26.0088	25.673	25.6557	26.0264	25.5345	25.8444	24.3836	25.5027	25.6363	25.2778	25.2474	25.4422	25.7329	25.7213	25.7213	25.4609	25.5884	7	4	5	7	7	6	7	7	5	2	6	5	4	5	5	7	5	7	5	6
O75828	O75828	Carbonyl reductase [NADPH] 3	CBR3	27.2387	25.7802	26.1709	25.9658	25.8428	25.4096	25.9372	26.87	27.1789	25.599	29.3623	26.433	28.6093	26.4829	26.3331	26.1498	25.2359	25.2972	26.0821	26.8985	7	7	1	9	2	1	3	9	2	2	12	2	10	3	2	10	2	2	5	9
O75832;O75832-2	O75832;O75832-2	26S proteasome non-ATPase regulatory subunit 10	PSMD10	24.7753	24.9959	25.0466	25.4592	24.9987	25.5934	25.2529	25.6209	24.4358	24.6887	25.092	25.23	25.5437	25.4894	24.985	25.1035	25.5745	25.139	25.5882	25.3641	5	4	5	5	3	4	2	3	3	1	3	4	3	4	2	4	3	4	3	4
O75843	O75843	AP-1 complex subunit gamma-like 2	AP1G2	23.9833	23.2744	23.0854	23.0745	23.165	NaN	22.2347	NaN	NaN	NaN	23.0217	NaN	23.0893	23.1445	22.6895	NaN	23.1577	NaN	NaN	23.967	4	1	1	1	1	NaN	1	NaN	NaN	NaN	3	NaN	3	3	2	NaN	3	NaN	NaN	4
O75844	O75844	CAAX prenyl protease 1 homolog	ZMPSTE24	25.7275	26.0972	25.5084	26.051	26.434	24.5526	25.9428	25.8818	24.1398	24.1639	25.0544	25.2568	25.2397	25.0746	26.5928	25.5531	26.2701	25.4033	25.3455	25.9976	8	9	7	7	9	6	9	10	3	1	7	7	8	4	9	8	6	9	5	11
O75874	O75874	Isocitrate dehydrogenase [NADP] cytoplasmic	IDH1	30.7393	29.0424	31.2836	30.115	30.3011	28.9818	29.033	29.5209	28.5071	28.2233	29.61	30.0734	30.8314	31.4146	29.2566	30.5544	30.0727	28.3904	29.5626	31.0062	21	18	21	19	18	17	18	17	14	12	18	19	21	21	14	18	15	14	12	20
O75879	O75879	Glutamyl-tRNA(Gln) amidotransferase subunit B, mitochondrial	GATB	22.2697	NaN	21.3117	20.6762	21.2346	21.0759	21.438	21.3825	22.0332	NaN	21.327	NaN	NaN	20.9797	NaN	NaN	21.3939	22.1078	NaN	22.2137	4	NaN	1	1	1	1	1	1	2	NaN	1	NaN	NaN	1	NaN	NaN	1	2	NaN	2
O75880	O75880	Protein SCO1 homolog, mitochondrial	SCO1	NaN	23.1225	24.0013	24.3591	24.2629	23.5205	24.0291	NaN	24.479	NaN	23.8389	23.8224	23.6712	23.9198	24.2196	24.289	24.5551	24.1316	23.3648	24.3802	NaN	1	2	3	2	1	3	NaN	2	NaN	1	2	3	1	3	2	3	3	2	3
O75882-3;O75882-2;O75882	O75882-3;O75882-2;O75882	Attractin	ATRN	22.66	NaN	25.3004	22.578	23.2044	NaN	NaN	22.6348	24.4489	24.4744	23.2654	22.8267	23.099	24.0091	25.2401	22.6131	25.3139	22.6937	22.5804	22.573	3	NaN	8	2	3	NaN	NaN	1	5	3	3	2	3	4	5	3	8	2	2	4
O75884;O75884-2	O75884;O75884-2	Putative hydrolase RBBP9	RBBP9	24.976	25.2334	25.4036	24.7972	26.0263	25.7421	23.9697	23.9989	25.3355	24.0149	24.8586	25.8168	25.4388	25.5082	26.6391	25.2152	25.1708	24.6338	24.8935	25.8597	5	5	5	4	5	5	2	6	5	1	3	5	4	5	5	7	3	6	1	7
O75886;O75886-2	O75886;O75886-2	Signal transducing adapter molecule 2	STAM2	22.6094	22.5935	23.3406	22.6796	23.035	23.1389	22.9581	22.8607	22.9063	NaN	23.4694	23.4283	23.147	22.6736	23.0967	23.6516	23.2166	22.7287	NaN	23.3461	2	2	2	2	2	1	2	1	1	NaN	2	2	2	1	2	2	2	2	NaN	2
O75891;O75891-3;O75891-2;O75891-4	O75891;O75891-3;O75891-2;O75891-4	Cytosolic 10-formyltetrahydrofolate dehydrogenase	ALDH1L1	NaN	NaN	25.695	NaN	24.2912	NaN	23.9787	NaN	22.847	NaN	NaN	NaN	NaN	24.0545	NaN	23.9425	23.9157	21.9043	22.2622	26.9166	NaN	NaN	14	NaN	4	NaN	4	NaN	2	NaN	NaN	NaN	NaN	3	NaN	7	1	1	1	15
O75897-2;O75897	O75897-2;O75897	Sulfotransferase 1C4	SULT1C4	NaN	NaN	NaN	NaN	NaN	NaN	NaN	NaN	23.5316	NaN	NaN	NaN	22.4409	NaN	NaN	NaN	NaN	NaN	NaN	NaN	NaN	NaN	NaN	NaN	NaN	NaN	NaN	NaN	3	NaN	NaN	NaN	1	NaN	NaN	NaN	NaN	NaN	NaN	NaN
O75907	O75907	Diacylglycerol O-acyltransferase 1	DGAT1	22.7408	NaN	23.7213	20.7176	22.4744	21.0458	22.6862	22.7729	NaN	NaN	NaN	NaN	NaN	NaN	22.0923	22.2871	NaN	NaN	NaN	22.7141	2	NaN	2	1	1	1	2	1	NaN	NaN	NaN	NaN	NaN	NaN	1	1	1	NaN	NaN	1
O75909-1;O75909;O75909-4;O75909-2	O75909-1;O75909;O75909-4;O75909-2	Cyclin-K	CCNK	21.2076	20.6799	21.0805	22.6042	21.8375	21.9164	21.4063	21.2058	22.2838	NaN	21.678	22.0412	21.5963	21.5917	21.6048	22.3839	21.6855	22.3528	22.3961	21.7413	1	2	1	1	1	2	1	1	1	NaN	2	2	1	1	2	2	1	2	1	2
O75911	O75911	Short-chain dehydrogenase/reductase 3	DHRS3	23.3152	NaN	NaN	23.6297	22.732	NaN	NaN	NaN	22.9859	NaN	NaN	22.5406	NaN	23.0788	NaN	22.4422	NaN	22.4726	22.9702	23.068	2	NaN	NaN	4	1	NaN	NaN	NaN	1	NaN	NaN	2	NaN	1	NaN	1	NaN	1	1	2
O75915	O75915	PRA1 family protein 3	ARL6IP5	26.1104	26.7396	25.5085	26.7052	25.9123	25.9906	26.4466	26.5569	25.6948	25.8948	27.5904	26.8965	27.136	27.079	26.4574	26.7705	24.2487	26.2596	26.528	27.2153	3	4	4	4	3	3	4	4	3	2	4	3	4	4	4	4	2	4	3	4
O75923-3;O75923-9;O75923;O75923-14;O75923-6;O75923-12;O75923-5;O75923-11;O75923-4;O75923-10;O75923-2;O75923-8;O75923-7;O75923-13;O75923-15	O75923-3;O75923-9;O75923;O75923-14;O75923-6;O75923-12;O75923-5;O75923-11;O75923-4;O75923-10;O75923-2;O75923-8;O75923-7;O75923-13;O75923-15	Dysferlin	DYSF	22.2063	22.4105	NaN	21.9057	21.8639	21.2695	20.6	22.6985	20.5957	24.4409	NaN	23.7883	20.6111	27.9704	NaN	21.8069	NaN	21.4598	25.3397	20.8542	3	4	NaN	1	2	1	1	3	3	7	NaN	3	1	32	NaN	4	NaN	4	11	2
O75928-3;O75928-2;O75928;O75925;O75925-2	O75928-3;O75928-2;O75928;O75925;O75925-2	E3 SUMO-protein ligase PIAS2;E3 SUMO-protein ligase PIAS1	PIAS2;PIAS1	21.7497	21.6368	NaN	NaN	21.8523	NaN	21.8782	NaN	NaN	NaN	NaN	NaN	NaN	NaN	NaN	NaN	NaN	NaN	NaN	NaN	1	1	NaN	NaN	1	NaN	1	1	NaN	NaN	NaN	NaN	NaN	NaN	NaN	NaN	NaN	NaN	NaN	NaN
O75934	O75934	Pre-mRNA-splicing factor SPF27	BCAS2	24.1566	24.3355	24.5954	25.016	24.8654	24.0088	23.7933	24.5791	24.6814	NaN	23.8059	24.4208	23.7138	24.0189	24.3475	24.1422	24.2235	24.7019	23.9355	24.342	3	3	3	5	3	1	2	3	1	NaN	3	3	4	4	4	3	3	3	2	4
O75935-3;O75935;O75935-2	O75935-3;O75935;O75935-2	Dynactin subunit 3	DCTN3	23.7626	23.8509	22.9992	23.405	24.1796	23.6261	23.7487	23.5103	22.7904	23.338	24.6804	23.4456	23.7117	22.9285	23.0838	23.6083	22.9055	23.3358	NaN	23.1423	3	3	1	3	2	4	2	2	1	1	3	3	3	2	1	2	1	2	NaN	1
O75936	O75936	Gamma-butyrobetaine dioxygenase	BBOX1	NaN	NaN	NaN	22.2327	NaN	NaN	NaN	22.4386	NaN	NaN	NaN	NaN	NaN	NaN	NaN	NaN	NaN	NaN	NaN	NaN	NaN	NaN	NaN	2	NaN	NaN	NaN	1	NaN	NaN	NaN	NaN	NaN	NaN	NaN	NaN	NaN	NaN	NaN	NaN
O75937	O75937	DnaJ homolog subfamily C member 8	DNAJC8	25.3611	25.4645	24.7095	25.6163	25.2309	25.2596	25.5306	25.6474	25.0879	23.9635	25.1901	25.3139	25.4099	25.2673	25.0705	25.7004	25.5107	25.5017	25.5961	25.2008	6	5	4	7	6	3	5	5	3	1	5	5	6	6	3	5	3	6	4	6
O75940	O75940	Survival of motor neuron-related-splicing factor 30	SMNDC1	23.8567	23.9564	24.2732	24.7928	23.9738	24.5252	24.0068	24.0995	24.4553	NaN	23.6715	24.3086	23.9354	24.3826	24.2011	23.8561	24.059	24.9869	24.2145	24.3371	3	3	3	4	3	3	3	3	3	NaN	3	3	3	2	3	3	3	4	1	4
O75947;O75947-2	O75947;O75947-2	ATP synthase subunit d, mitochondrial	ATP5H	29.322	27.9087	28.0499	28.0856	27.7386	28.3573	28.3653	28.2114	28.0589	26.9967	28.107	27.9106	28.2399	28.0423	28.394	28.1483	29.2235	28.4686	27.8569	28.4468	9	8	9	8	9	9	8	9	9	7	9	8	7	9	8	9	8	9	8	9
O75954	O75954	Tetraspanin-9	TSPAN9	NaN	21.7864	NaN	NaN	NaN	22.547	22.3108	NaN	NaN	NaN	22.1682	NaN	22.351	22.4369	NaN	NaN	NaN	NaN	NaN	22.2497	NaN	1	NaN	NaN	NaN	2	1	NaN	NaN	NaN	1	NaN	1	1	NaN	NaN	NaN	NaN	NaN	1
O75955;O75955-2	O75955;O75955-2	Flotillin-1	FLOT1	26.9566	26.6364	26.9421	27.0582	26.8968	26.6105	27.2183	26.6794	26.9593	26.0987	26.1136	27.041	27.3889	27.9545	26.8479	27.0097	27.8651	26.6745	26.8834	26.2321	17	12	17	16	15	14	15	14	14	4	9	17	17	18	18	13	15	14	12	12
O75962-2;O75962-4;O75962;O75962-3;O75962-5	O75962-2;O75962-4;O75962;O75962-3;O75962-5	Triple functional domain protein	TRIO	NaN	21.3685	20.6102	20.1996	NaN	21.3455	21.6833	21.9544	NaN	NaN	21.0007	21.4488	20.7375	NaN	NaN	20.976	NaN	20.8161	NaN	20.4571	1	1	1	1	NaN	1	1	1	NaN	NaN	1	1	1	NaN	NaN	1	NaN	1	1	1
O75964	O75964	ATP synthase subunit g, mitochondrial	ATP5L	27.2353	26.0387	25.8332	26.7575	25.5419	26.2043	26.4443	26.3646	25.7318	24.7946	26.1018	25.9017	26.0806	25.8013	26.0819	26.0901	26.8425	26.49	25.3585	26.6603	3	3	3	4	4	3	3	2	3	3	3	3	3	3	4	3	3	2	4	3
O75976;O75976-2	O75976;O75976-2	Carboxypeptidase D	CPD	26.1212	22.6171	23.9032	22.8142	22.651	22.9415	22.7831	22.3592	23.3027	NaN	22.8758	NaN	24.3656	27.6657	25.2245	22.7432	23.7029	23.3344	22.8174	25.3814	14	1	4	3	2	1	2	2	5	NaN	3	NaN	7	17	14	3	3	3	4	11
O75995	O75995	SAM and SH3 domain-containing protein 3	SASH3	NaN	24.3385	24.3169	24.1274	23.3074	NaN	23.8786	24.7843	NaN	NaN	24.4066	24.5474	23.3129	24.2133	NaN	24.2513	24.4	NaN	22.2116	NaN	NaN	3	1	1	2	NaN	3	3	NaN	1	1	2	2	2	1	2	1	NaN	2	NaN
O76003	O76003	Glutaredoxin-3	GLRX3	26.6455	26.774	26.2642	27.1159	26.5257	26.6193	26.1082	26.4048	26.0044	25.0041	26.2625	26.5902	25.9559	25.8921	26.3679	26.7797	26.1916	27.4007	26.6252	26.1127	10	9	8	9	9	9	8	8	8	1	8	8	6	7	8	9	8	8	8	9
O76021;O76021-2	O76021	Ribosomal L1 domain-containing protein 1	RSL1D1	27.9109	26.6512	27.6364	26.9916	26.8334	27.3701	27.0727	26.6494	27.1033	25.6213	27.2323	26.8394	26.4148	26.5064	26.4695	27.4014	27.3483	27.9048	26.5171	27.062	11	8	12	13	13	13	12	11	12	6	11	9	11	11	10	12	9	13	9	13
O76024	O76024	Wolframin	WFS1	NaN	24.8557	24.5898	23.6661	24.603	26.1555	23.6116	22.8158	24.1034	22.2844	25.1433	24.9124	25.1949	23.7061	23.8967	26.4021	22.7748	25.052	22.8633	27.4652	NaN	5	7	6	7	11	3	3	5	1	9	6	8	3	3	13	1	8	1	14
O76027	O76027	Annexin A9	ANXA9	NaN	NaN	NaN	20.5703	NaN	NaN	20.8601	NaN	21.4814	NaN	26.0212	NaN	21.1189	NaN	NaN	NaN	NaN	NaN	NaN	NaN	NaN	NaN	NaN	1	NaN	NaN	1	NaN	1	NaN	7	NaN	1	NaN	NaN	NaN	NaN	NaN	NaN	NaN
O76031	O76031	ATP-dependent Clp protease ATP-binding subunit clpX-like, mitochondrial	CLPX	24.7691	22.372	22.9395	23.7469	22.4571	23.5553	22.5469	22.2004	23.1561	NaN	21.9043	22.3585	NaN	22.8721	22.3307	22.6816	21.9857	24.5526	21.6547	22.584	5	3	2	5	2	3	2	1	2	NaN	2	1	NaN	1	1	4	2	5	1	1
O76041-2;O76041	O76041-2	Nebulette	NEBL	NaN	NaN	NaN	NaN	NaN	NaN	NaN	NaN	NaN	NaN	NaN	22.3888	NaN	NaN	23.0181	NaN	NaN	NaN	NaN	NaN	NaN	NaN	NaN	NaN	NaN	NaN	NaN	NaN	NaN	NaN	NaN	1	NaN	NaN	3	NaN	1	NaN	NaN	NaN
O76054-5;O76054;O76054-4;Q9UDX4-3;Q9UDX4-2;Q9UDX4	O76054-5;O76054;O76054-4	SEC14-like protein 2	SEC14L2	22.5211	NaN	NaN	24.3861	NaN	23.2037	NaN	22.9882	NaN	NaN	23.3782	23.7207	NaN	NaN	23.5326	23.5289	23.3017	22.791	22.5549	22.2552	2	NaN	NaN	5	NaN	1	NaN	2	NaN	NaN	4	3	NaN	NaN	3	5	1	2	1	1
O76061	O76061	Stanniocalcin-2	STC2	21.1613	NaN	21.5936	NaN	21.8377	NaN	NaN	20.9562	NaN	23.325	23.7029	NaN	NaN	22.4582	21.1857	20.3369	21.1538	22.0717	NaN	21.0385	1	NaN	2	NaN	2	NaN	NaN	1	NaN	2	2	NaN	NaN	2	1	1	1	2	NaN	2
O76062;O76062-2	O76062;O76062-2	Delta(14)-sterol reductase	TM7SF2	NaN	NaN	23.3803	22.5047	NaN	NaN	NaN	NaN	NaN	NaN	22.2169	21.4943	22.1499	NaN	22.6987	NaN	22.4195	21.8978	NaN	22.2899	NaN	NaN	2	2	NaN	NaN	NaN	NaN	NaN	NaN	2	2	1	NaN	2	NaN	1	1	NaN	1
O76070	O76070	Gamma-synuclein	SNCG	NaN	23.4672	26.9372	25.5741	21.908	23.3254	27.645	23.297	NaN	NaN	NaN	23.0588	22.0764	NaN	22.9467	NaN	NaN	21.4141	20.8461	NaN	NaN	4	7	6	2	3	6	3	NaN	NaN	NaN	2	1	NaN	4	NaN	NaN	1	1	NaN
O76071	O76071	Probable cytosolic iron-sulfur protein assembly protein CIAO1	CIAO1	23.6591	23.7565	23.8738	24.0026	24.2324	24.1065	24.1555	24.1673	24.3533	NaN	23.5479	23.5931	23.7216	23.7587	24.2472	23.7967	24.166	24.3393	23.5539	23.502	3	4	4	5	6	3	5	6	4	NaN	3	3	3	3	4	3	1	6	2	1
O76074-2;O76074	O76074-2;O76074	cGMP-specific 3,5-cyclic phosphodiesterase	PDE5A	NaN	NaN	NaN	NaN	NaN	NaN	NaN	NaN	NaN	NaN	NaN	NaN	NaN	NaN	NaN	NaN	22.3662	NaN	NaN	NaN	NaN	NaN	3	NaN	NaN	NaN	NaN	NaN	NaN	NaN	NaN	NaN	NaN	NaN	NaN	NaN	1	NaN	NaN	NaN
O76075;O76075-2	O76075;O76075-2	DNA fragmentation factor subunit beta	DFFB	22.5945	21.8069	NaN	22.3228	NaN	NaN	NaN	NaN	NaN	NaN	21.5836	22.6321	21.8276	22.2305	NaN	22.5714	22.6773	NaN	NaN	22.4179	2	1	NaN	1	NaN	NaN	NaN	NaN	NaN	NaN	2	1	1	1	NaN	2	2	NaN	NaN	1
O76076;O76076-2	O76076	WNT1-inducible-signaling pathway protein 2	WISP2	NaN	NaN	NaN	NaN	NaN	NaN	NaN	NaN	NaN	23.3521	NaN	22.2997	22.5779	NaN	NaN	NaN	NaN	NaN	NaN	NaN	NaN	NaN	NaN	NaN	NaN	NaN	NaN	NaN	NaN	1	NaN	1	1	NaN	NaN	NaN	NaN	NaN	NaN	NaN
O76080	O76080	AN1-type zinc finger protein 5	ZFAND5	20.3129	19.7182	NaN	19.9174	NaN	NaN	19.9043	20.7026	NaN	NaN	NaN	NaN	NaN	NaN	NaN	19.9167	19.549	19.9866	NaN	NaN	1	1	NaN	1	NaN	NaN	1	1	NaN	NaN	NaN	NaN	NaN	NaN	NaN	1	1	1	NaN	NaN
O76094;O76094-2	O76094;O76094-2	Signal recognition particle subunit SRP72	SRP72	26.5826	26.6462	25.5935	26.5732	26.4045	26.0592	26.636	26.5459	25.9881	24.5634	26.0683	25.7658	26.2614	26.1286	25.8935	26.3819	25.6249	26.4306	26.0456	26.38	14	14	11	13	11	11	14	13	10	2	13	10	10	9	10	13	7	13	8	13
O94760;O94760-2	O94760;O94760-2	N(G),N(G)-dimethylarginine dimethylaminohydrolase 1	DDAH1	28.4022	26.1612	27.8188	25.533	26.1958	27.1974	26.1791	26.0206	28.2439	22.5259	25.4995	28.2901	27.4699	28.9347	27.8589	26.9765	28.4974	27.3852	26.9545	27.8549	14	9	14	8	9	12	11	8	12	2	7	14	14	14	14	10	11	12	11	12
O94763-4;O94763-3;O94763;O94763-2	O94763-4;O94763-3;O94763;O94763-2	Unconventional prefoldin RPB5 interactor 1	URI1	NaN	NaN	21.3621	20.9326	NaN	NaN	NaN	NaN	NaN	NaN	NaN	NaN	21.5933	NaN	NaN	NaN	NaN	21.6016	NaN	21.5796	NaN	NaN	1	1	NaN	NaN	NaN	NaN	NaN	NaN	NaN	NaN	1	NaN	NaN	NaN	NaN	1	NaN	1
O94766-2;O94766	O94766-2;O94766	Galactosylgalactosylxylosylprotein 3-beta-glucuronosyltransferase 3	B3GAT3	NaN	NaN	NaN	NaN	23.2318	23.0582	NaN	23.3507	NaN	NaN	23.0269	NaN	NaN	23.4793	23.0471	NaN	23.4173	22.094	NaN	NaN	1	1	1	1	2	1	1	3	NaN	NaN	2	NaN	1	3	2	1	1	2	NaN	1
O94769;O94769-2	O94769;O94769-2	Extracellular matrix protein 2	ECM2	NaN	NaN	NaN	20.1202	21.4981	27.0152	NaN	NaN	19.1148	22.0964	NaN	21.9317	21.845	19.691	22.9119	20.6461	NaN	19.97	NaN	21.0256	NaN	NaN	1	1	3	9	NaN	NaN	1	2	NaN	1	1	2	2	1	NaN	1	NaN	2
O94776;O94776-2	O94776;O94776-2	Metastasis-associated protein MTA2	MTA2	25.0159	25.1118	24.5377	25.9792	25.8412	25.4708	25.6411	26.0117	25.17	23.277	25.4426	25.6567	25.1198	24.743	25.4176	25.7715	25.8784	25.8537	24.9459	25.5951	7	8	4	12	9	7	12	11	5	1	7	9	5	4	7	8	8	12	4	10
O94788;O94788-2;O94788-3;O94788-4	O94788;O94788-2;O94788-3;O94788-4	Retinal dehydrogenase 2	ALDH1A2	22.1413	22.1445	25.0907	22.6834	NaN	NaN	NaN	NaN	NaN	23.5683	22.3776	21	22.2972	NaN	NaN	NaN	NaN	23.0579	NaN	NaN	1	2	8	1	NaN	NaN	NaN	NaN	NaN	1	1	1	1	NaN	NaN	NaN	NaN	1	NaN	NaN
O94804	O94804	Serine/threonine-protein kinase 10	STK10	NaN	24.9416	23.2116	23.9268	24.2466	25.2234	25.0965	24.8265	24.3379	24.42	NaN	24.4322	24.3412	24.5321	24.0044	24.4128	NaN	23.3105	24.773	24.1734	NaN	5	1	4	4	1	8	7	2	4	NaN	2	4	4	1	5	NaN	4	6	1
O94811	O94811	Tubulin polymerization-promoting protein	TPPP	NaN	21.7638	22.4981	22.2849	21.4206	NaN	NaN	NaN	NaN	NaN	NaN	NaN	NaN	NaN	NaN	NaN	NaN	NaN	NaN	NaN	NaN	1	1	1	1	NaN	NaN	NaN	NaN	NaN	NaN	NaN	NaN	NaN	NaN	NaN	NaN	NaN	NaN	NaN
O94817	O94817	Ubiquitin-like protein ATG12	ATG12	21.057	NaN	NaN	NaN	NaN	NaN	NaN	21.3468	20.6111	NaN	NaN	NaN	NaN	21.1305	NaN	NaN	NaN	19.9976	NaN	21.5187	1	NaN	NaN	NaN	NaN	NaN	NaN	1	1	NaN	1	NaN	NaN	1	NaN	NaN	NaN	1	NaN	1
O94822;O94822-3;O94822-2	O94822;O94822-3	E3 ubiquitin-protein ligase listerin	LTN1	NaN	22.0562	NaN	21.3056	NaN	NaN	21.2173	NaN	NaN	NaN	NaN	NaN	NaN	NaN	21.1142	21.7525	NaN	NaN	NaN	NaN	NaN	1	NaN	3	NaN	NaN	1	NaN	NaN	NaN	NaN	NaN	NaN	1	1	1	NaN	NaN	NaN	NaN
O94823	O94823	Probable phospholipid-transporting ATPase VB	ATP10B	NaN	NaN	NaN	NaN	NaN	NaN	NaN	NaN	26.9468	NaN	NaN	NaN	NaN	NaN	NaN	NaN	NaN	NaN	NaN	NaN	NaN	NaN	NaN	NaN	NaN	NaN	NaN	NaN	1	NaN	NaN	NaN	NaN	NaN	NaN	NaN	NaN	NaN	NaN	NaN
O94826	O94826	Mitochondrial import receptor subunit TOM70	TOMM70A	28.1681	26.8927	27.7239	27.5554	26.8165	26.9351	27.7415	26.7917	27.8314	24.4262	27.4522	26.9893	27.2324	27.0197	27.4294	27.3365	27.7207	27.624	26.5263	27.81	18	13	18	18	14	14	18	12	17	3	16	15	16	14	16	17	15	18	6	15
O94829	O94829	Importin-13	IPO13	NaN	NaN	NaN	18.1673	19.4252	NaN	NaN	NaN	NaN	NaN	NaN	NaN	NaN	NaN	NaN	NaN	NaN	NaN	NaN	NaN	2	NaN	NaN	1	1	NaN	NaN	NaN	1	NaN	NaN	NaN	NaN	NaN	NaN	NaN	NaN	NaN	NaN	NaN
O94832;B0I1T2-2	O94832	Unconventional myosin-Id	MYO1D	27.791	27.8827	26.3715	25.861	24.3135	26.3272	26.7908	25.4202	24.9604	25.6623	27.2385	27.1001	26.871	26.4147	26.6547	25.8212	27.2434	25.9614	25.097	26.4892	33	28	16	15	11	17	25	7	9	5	26	25	28	11	23	11	17	16	8	17
O94842-3;O94842-2;O94842;O94900;O15405-2;O15405	O94842-3;O94842-2;O94842;O94900;O15405-2;O15405	TOX high mobility group box family member 4;Thymocyte selection-associated high mobility group box protein TOX;TOX high mobility group box family member 3	TOX4;TOX;TOX3	NaN	NaN	NaN	21.636	NaN	NaN	NaN	NaN	NaN	NaN	NaN	NaN	NaN	NaN	NaN	NaN	NaN	NaN	NaN	NaN	NaN	NaN	NaN	2	NaN	NaN	NaN	NaN	NaN	NaN	NaN	NaN	NaN	NaN	1	NaN	NaN	NaN	NaN	NaN
O94855;O94855-2	O94855;O94855-2	Protein transport protein Sec24D	SEC24D	26.3598	27.9071	26.0969	26.0834	27.1436	26.8482	27.1578	26.4864	26.3425	26.6842	26.1313	26.3858	26.8498	26.2557	26.4897	27.309	26.1109	26.199	26.6721	27.4087	9	15	8	13	13	11	13	15	8	12	9	11	13	11	11	15	12	15	11	14
O94864-4;O94864-2;O94864	O94864-4;O94864-2;O94864	STAGA complex 65 subunit gamma	SUPT7L	20.7397	21.0917	NaN	20.4015	20.9733	NaN	NaN	21.2792	21.0208	NaN	20.8471	20.5032	21.0949	NaN	21.2384	21.5191	NaN	20.8849	21.3784	20.6992	1	1	NaN	1	1	NaN	NaN	1	1	1	1	1	1	NaN	1	1	NaN	1	1	1
O94874;O94874-2;O94874-3	O94874;O94874-2;O94874-3	E3 UFM1-protein ligase 1	UFL1	26.2901	26.7621	26.5337	27.0946	26.3794	26.3276	26.7272	27.1069	26.6497	24.1139	27.4458	26.3864	26.7647	26.6794	26.074	26.8935	26.0661	26.392	25.835	26.8338	17	16	18	19	17	13	19	19	19	3	19	16	16	14	10	20	8	18	9	18
O94875-3;O94875-8;O94875-2;O94875-4;O94875-12;O94875-10;O94875-5;O94875-6	O94875-3;O94875-8;O94875-2;O94875-4;O94875-12;O94875-10;O94875-5	Sorbin and SH3 domain-containing protein 2	SORBS2	NaN	NaN	21.8928	NaN	NaN	NaN	NaN	NaN	NaN	NaN	NaN	23.0281	NaN	NaN	NaN	23.4868	NaN	NaN	NaN	22.7003	NaN	NaN	1	NaN	NaN	NaN	NaN	NaN	NaN	NaN	NaN	1	NaN	NaN	NaN	1	NaN	NaN	NaN	1
O94875-11;O94875-9;O94875;O94875-7	O94875-11;O94875-9;O94875;O94875-7	Sorbin and SH3 domain-containing protein 2	SORBS2	24.9002	24.5899	24.7227	NaN	23.6016	24.8976	22.5567	24.0002	23.3518	NaN	25.3996	26.3463	26.0845	25.1544	25.4707	25.7672	24.7688	24.2628	23.9423	26.1937	7	5	7	NaN	1	5	1	2	2	NaN	6	8	7	5	7	9	5	5	2	9
O94880	O94880	PHD finger protein 14	PHF14	NaN	NaN	21.7886	22.0053	NaN	NaN	NaN	NaN	NaN	NaN	NaN	21.3896	20.5318	NaN	NaN	NaN	NaN	21.4898	NaN	NaN	NaN	NaN	1	1	NaN	NaN	NaN	NaN	NaN	NaN	NaN	1	1	NaN	NaN	1	1	2	NaN	NaN
O94886	O94886	CSC1-like protein 1	TMEM63A	25.3192	NaN	26.6214	22.067	22.7999	22.4104	NaN	NaN	25.0813	NaN	23.2805	23.4282	24.279	24.5613	24.7771	23.4043	24.8103	NaN	23.98	25.4389	8	NaN	9	1	1	1	NaN	NaN	6	NaN	1	1	6	5	7	2	7	NaN	2	7
O94888	O94888	UBX domain-containing protein 7	UBXN7	24.0319	23.1908	23.8597	26.5527	23.4487	24.9394	24.5037	24.4445	24.4074	NaN	24.7593	23.9822	NaN	24.7346	24.5191	24.2134	NaN	24.1159	25.0256	24.3906	3	3	2	8	1	2	5	5	3	NaN	5	2	NaN	1	4	1	NaN	6	1	2
O94901-5;O94901-8;O94901;O94901-9;O94901-6;O94901-2;O94901-7;O94901-3	O94901-5;O94901-8;O94901;O94901-9;O94901-6	SUN domain-containing protein 1	SUN1	24.8338	24.7501	25.1249	25.1109	25.0692	25.5685	24.504	24.1623	24.396	23.8718	25.0273	25.6093	23.6636	25.2717	24.9224	24.5113	25.5519	25.0796	24.3769	24.2378	6	6	4	8	6	8	7	5	4	1	6	7	3	6	6	6	3	10	2	4
O94903	O94903	Proline synthase co-transcribed bacterial homolog protein	PROSC	25.9483	25.1944	26.2083	25.888	24.9363	25.3265	25.2228	24.8432	26.4681	24.6868	26.2919	25.8614	25.8537	26.2531	25.2129	25.4389	25.8986	25.5893	24.9028	25.8202	7	6	6	5	6	5	7	6	7	3	7	7	7	7	4	4	3	5	4	7
O94905;O94905-2;O94905-3	O94905	Erlin-2	ERLIN2	27.8952	26.9351	28.127	27.7426	27.381	28.0175	26.9905	26.7788	27.3306	26.6555	27.9999	28.5413	28.0479	28.6469	28.3879	27.6715	28.2329	27.9673	26.9649	27.857	14	12	14	15	14	14	14	12	13	8	14	15	14	14	13	14	11	13	13	14
O94906;O94906-2	O94906;O94906-2	Pre-mRNA-processing factor 6	PRPF6	25.9467	25.7678	25.4535	26.5527	26.3404	26.7534	26.3435	25.7551	26.3973	NaN	26.3502	25.8667	25.7166	25.9507	25.6691	26.4281	26.2785	26.0682	25.5044	25.8533	15	13	11	17	14	18	14	14	20	NaN	18	15	12	14	14	18	18	17	10	14
O94907	O94907	Dickkopf-related protein 1	DKK1	NaN	NaN	NaN	NaN	NaN	NaN	NaN	NaN	NaN	NaN	24.2723	NaN	21.9485	NaN	NaN	21.1702	NaN	NaN	NaN	23.0051	NaN	NaN	NaN	NaN	NaN	NaN	NaN	NaN	NaN	NaN	2	NaN	1	NaN	NaN	1	NaN	NaN	NaN	2
O94913	O94913	Pre-mRNA cleavage complex 2 protein Pcf11	PCF11	20.634	NaN	NaN	20.6039	20.2477	19.879	19.9232	NaN	NaN	NaN	19.2342	NaN	NaN	19.9526	NaN	NaN	NaN	NaN	NaN	NaN	1	NaN	NaN	1	1	1	1	NaN	1	NaN	1	NaN	NaN	1	NaN	NaN	NaN	NaN	NaN	NaN
O94915;O94915-2	O94915	Protein furry homolog-like	FRYL	21.9788	23.3005	22.3043	21.6474	21.7083	22.0509	22.0831	25.0139	22.6339	22.558	22.6773	22.6052	22.6854	23.1078	NaN	23.6959	NaN	22.1235	22.5112	22.2472	3	2	1	3	2	2	3	6	2	1	1	2	2	2	NaN	3	NaN	2	1	3
O94919	O94919	Endonuclease domain-containing 1 protein	ENDOD1	24.8145	24.8047	26.5359	24.8907	25.1505	25.3596	25.7466	26.1106	24.567	24.2133	25.2728	25.6057	25.0408	24.1695	26.2383	24.5163	24.7636	24.8266	24.8424	24.7796	6	6	9	6	7	5	6	7	4	1	6	8	7	2	6	4	3	6	1	4
O94921-3;O94921-2;O94921;Q00536;Q00536-3;Q00536-2	O94921-3;O94921-2;O94921;Q00536;Q00536-3;Q00536-2	Cyclin-dependent kinase 14;Cyclin-dependent kinase 16	CDK14;CDK16	NaN	NaN	20.6924	NaN	NaN	NaN	NaN	NaN	NaN	NaN	NaN	NaN	NaN	NaN	NaN	NaN	NaN	NaN	NaN	NaN	NaN	NaN	1	NaN	NaN	NaN	NaN	NaN	NaN	NaN	NaN	1	NaN	NaN	NaN	1	NaN	NaN	NaN	NaN
O94923	O94923	D-glucuronyl C5-epimerase	GLCE	NaN	23.4057	NaN	NaN	23.6214	NaN	23.706	NaN	23.1832	23.832	NaN	NaN	NaN	23.6148	NaN	23.5126	23.5365	22.2225	23.8782	NaN	NaN	1	NaN	NaN	1	NaN	1	NaN	1	1	NaN	1	1	1	NaN	1	1	1	1	1
O94925;O94925-2	O94925	Glutaminase kidney isoform, mitochondrial	GLS	26.1811	25.4169	22.0493	27.3324	23.499	26.1027	26.2788	23.8571	27.7726	22.5367	21.613	22.3252	24.029	NaN	25.0726	22.9	24.5007	24.6039	22.8982	21.8029	14	12	4	14	6	14	9	4	16	3	2	2	4	NaN	11	2	5	6	2	1
O94925-3	O94925-3	Glutaminase kidney isoform, mitochondrial	GLS	23.0621	22.6835	21.7789	24.2427	22.3438	23.8493	22.2296	22.6883	23.6008	22.0621	21.5155	21.9588	21.6049	NaN	22.2296	21.2667	21.6597	22.5601	22.0717	NaN	2	2	1	2	1	1	1	1	1	1	1	1	1	NaN	1	1	1	1	1	NaN
O94929	O94929	Actin-binding LIM protein 3	ABLIM3	22.1227	21.2946	21.1403	NaN	21.9917	NaN	21.8596	NaN	NaN	NaN	22.366	21.8207	21.5389	NaN	NaN	NaN	NaN	22.0035	NaN	21.8331	1	1	1	NaN	1	NaN	1	NaN	NaN	NaN	1	1	1	NaN	NaN	NaN	NaN	1	NaN	1
O94952-1;O94952	O94952-1;O94952	F-box only protein 21	FBXO21	NaN	23.7649	23.5793	23.2088	22.2397	23.3226	NaN	23.0524	22.6284	NaN	23.0163	23.4114	23.058	22.3886	NaN	22.9941	24.0641	22.9306	23.3061	22.5447	NaN	1	4	2	1	3	NaN	2	1	NaN	2	1	3	1	NaN	1	3	1	2	2
O94966-7;O94966-6;O94966-5;O94966-4;O94966-3;O94966;O94966-2	O94966-7;O94966-6;O94966-5;O94966-4;O94966-3;O94966	Ubiquitin carboxyl-terminal hydrolase 19	USP19	23.1541	22.9361	22.6375	24.6552	23.4713	22.8539	23.7582	23.3981	23.2626	NaN	23.0972	22.0513	22.3729	23.2797	22.7796	23.8446	24.0239	24.0556	24.0562	NaN	3	2	1	6	3	3	3	3	3	NaN	2	1	2	2	1	3	1	5	1	1
O94973;O94973-2;O94973-3	O94973;O94973-2;O94973-3	AP-2 complex subunit alpha-2	AP2A2	26.6034	27.1936	27.0847	27.2225	27.5228	27.1892	27.5195	27.5272	28.3918	27.5374	26.6126	27.4058	27.5393	27.5985	27.4015	27.2636	27.5945	26.9869	27.5725	27.2506	14	20	16	19	20	15	19	21	23	8	14	16	17	19	18	22	16	16	11	16
O94979;O94979-3;O94979-9;O94979-2;O94979-8;O94979-4;O94979-6;O94979-10;O94979-7;O94979-5	O94979;O94979-3;O94979-9;O94979-2;O94979-8;O94979-4;O94979-6;O94979-10;O94979-7	Protein transport protein Sec31A	SEC31A	28.1547	28.6922	27.9775	27.9563	28.6879	28.2648	28.4038	28.3382	27.8494	27.7131	28.0091	28.0569	28.3478	28.03	28.3037	28.4426	27.7489	28.2265	28.3962	28.4976	26	28	24	30	27	22	27	28	20	17	23	26	27	23	20	27	18	25	24	24
O94992	O94992	Protein HEXIM1	HEXIM1	23.3992	23.2319	NaN	23.9077	23.35	23.8364	23.3351	25.3074	23.9519	NaN	23.74	NaN	23.9822	23.5343	23.8961	23.8755	23.1924	23.9152	23.8804	23.0852	2	1	1	2	2	1	2	2	3	NaN	2	NaN	1	2	2	2	2	3	3	2
O95049-5;O95049;O95049-4;O95049-3	O95049-5;O95049;O95049-4;O95049-3	Tight junction protein ZO-3	TJP3	24.2934	NaN	22.5652	22.2061	NaN	NaN	22.2555	22.9099	21.7487	NaN	23.4495	22.7875	22.7658	22.9293	23.7948	22.8288	24.416	23.3292	22.0283	23.2626	6	NaN	2	3	NaN	NaN	2	3	2	NaN	4	3	5	4	5	2	6	2	1	4
O95059	O95059	Ribonuclease P protein subunit p14	RPP14	NaN	NaN	NaN	20.4631	NaN	NaN	NaN	20.1906	NaN	NaN	NaN	NaN	NaN	NaN	NaN	20.5023	NaN	20.4136	NaN	NaN	NaN	NaN	NaN	1	NaN	NaN	NaN	1	NaN	NaN	NaN	NaN	NaN	NaN	NaN	1	NaN	1	NaN	NaN
O95070	O95070	Protein YIF1A	YIF1A	23.9256	24.3517	23.9165	23.0073	24.014	23.9805	23.9497	24.2418	23.9342	NaN	24.3307	23.2661	24.0357	23.6528	24.0283	24.3483	23.1202	23.651	22.8092	24.0612	3	3	3	1	3	3	3	2	3	NaN	3	3	3	3	3	3	2	3	1	3
O95071-2;O95071	O95071-2;O95071	E3 ubiquitin-protein ligase UBR5	UBR5	22.399	NaN	NaN	23.4668	22.0594	22.2635	22.3521	22.4362	22.7894	NaN	21.8139	22.638	NaN	NaN	23.2856	NaN	23.2372	22.8443	NaN	NaN	3	1	1	5	2	1	1	1	2	NaN	1	1	1	1	1	NaN	2	3	NaN	1
O95081-2;O95081	O95081-2;O95081	Arf-GAP domain and FG repeat-containing protein 2	AGFG2	NaN	NaN	NaN	NaN	NaN	NaN	NaN	NaN	NaN	NaN	NaN	NaN	NaN	NaN	NaN	NaN	NaN	NaN	NaN	NaN	1	NaN	NaN	NaN	NaN	NaN	NaN	NaN	NaN	NaN	NaN	NaN	1	NaN	NaN	NaN	NaN	NaN	NaN	NaN
O95084-2;O95084	O95084-2;O95084	Serine protease 23	PRSS23	NaN	NaN	NaN	NaN	NaN	NaN	NaN	NaN	NaN	24.804	NaN	NaN	NaN	NaN	NaN	NaN	NaN	NaN	NaN	NaN	NaN	NaN	3	NaN	NaN	NaN	NaN	NaN	NaN	3	NaN	2	NaN	NaN	NaN	NaN	NaN	NaN	NaN	1
O95104-3;O95104;O95104-2;Q9UPN6;Q9UPN6-2	O95104-3;O95104;O95104-2;Q9UPN6;Q9UPN6-2	Splicing factor, arginine/serine-rich 15;Protein SCAF8	SCAF4;SCAF8	23.438	22.6751	23.0981	23.8022	23.4716	23.5758	22.9544	23.3253	23.2886	NaN	23.1563	23.3711	23.1123	23.3199	23.2507	23.2855	23.9491	23.9304	23.1673	23.4569	5	2	4	4	3	3	2	4	3	NaN	2	5	3	2	4	3	3	5	1	3
O95136	O95136	Sphingosine 1-phosphate receptor 2	S1PR2	NaN	19.3797	19.9426	NaN	20.5534	NaN	19.6952	20.3598	19.3214	NaN	20.9699	21.5151	20.6681	20.3065	20.7407	20.0797	NaN	20.1762	19.506	NaN	NaN	1	1	NaN	1	NaN	1	1	1	NaN	1	1	1	1	1	1	NaN	1	1	1
O95139	O95139	NADH dehydrogenase [ubiquinone] 1 beta subcomplex subunit 6	NDUFB6	23.7942	23.1117	23.875	23.7286	22.6468	22.8645	23.0336	23.5799	23.0049	NaN	22.7566	22.6847	23.4197	22.8296	22.87	23.4259	23.8488	23.5186	22.8309	23.1745	1	1	1	1	1	1	1	1	1	NaN	1	1	1	1	1	1	1	1	1	1
O95140;O95140-2	O95140	Mitofusin-2	MFN2	24.791	23.2456	24.4741	23.8207	22.7232	23.3834	23.2798	23.5148	23.3361	NaN	NaN	23.5397	23.3306	22.4919	22.6658	22.3713	23.7458	23.4963	22.6956	22.5866	8	4	7	7	2	2	3	4	3	NaN	NaN	1	3	1	1	1	3	3	1	2
O95149	O95149	Snurportin-1	SNUPN	NaN	22.6666	22.833	23.0644	22.4515	23.4502	22.3479	23.2849	NaN	NaN	22.7031	23.0239	NaN	22.8943	NaN	22.583	NaN	24.4375	NaN	23.035	NaN	1	1	2	1	1	1	1	NaN	NaN	1	1	NaN	1	NaN	1	NaN	1	NaN	1
O95154;Q8NHP1-2	O95154	Aflatoxin B1 aldehyde reductase member 3	AKR7A3	28.6577	NaN	NaN	NaN	NaN	NaN	NaN	NaN	NaN	NaN	NaN	NaN	NaN	NaN	NaN	NaN	NaN	NaN	NaN	NaN	11	NaN	NaN	NaN	NaN	NaN	NaN	NaN	NaN	NaN	NaN	NaN	NaN	NaN	NaN	NaN	NaN	NaN	NaN	NaN
O95155-2;O95155;O95155-4;O95155-3	O95155-2;O95155;O95155-4;O95155-3	Ubiquitin conjugation factor E4 B	UBE4B	22.8597	23.0576	23.3691	23.2215	23.1352	NaN	22.647	23.4205	22.8182	NaN	22.6028	22.7155	22.808	22.9671	23.2246	23.2676	NaN	23.3965	NaN	22.9833	5	3	4	6	4	NaN	2	6	4	NaN	1	3	3	4	2	3	NaN	4	NaN	2
O95159	O95159	Zinc finger protein-like 1	ZFPL1	24.745	24.7045	25.5275	25.4344	26.1974	24.7631	24.7676	25.2119	26.262	23.9389	25.3824	24.1978	24.9006	24.8827	24.4388	25.107	24.2088	24.8674	24.4255	25.5877	6	7	5	5	7	5	5	6	7	4	5	6	5	5	5	7	3	5	5	6
O95163	O95163	Elongator complex protein 1	IKBKAP	24.2615	23.3314	23.7272	25.6839	23.26	22.7229	23.1412	24.3133	23.4952	NaN	24.3605	23.0453	NaN	23.044	22.8189	25.2662	23.3664	24.361	NaN	24.1823	10	3	4	11	1	1	1	5	3	NaN	4	2	NaN	1	1	7	1	7	NaN	4
Q9H0R8;O95166;Q9H0R8-2	Q9H0R8;O95166;Q9H0R8-2	Gamma-aminobutyric acid receptor-associated protein-like 1;Gamma-aminobutyric acid receptor-associated protein	GABARAPL1;GABARAP	NaN	20.7698	21.3311	19.438	NaN	20.7563	20.6659	NaN	NaN	NaN	21.37	NaN	22.1076	21.6064	21.1457	20.9706	NaN	NaN	22.6529	NaN	NaN	1	1	1	NaN	1	1	NaN	NaN	NaN	1	NaN	1	1	1	1	NaN	NaN	1	NaN
O95167	O95167	NADH dehydrogenase [ubiquinone] 1 alpha subcomplex subunit 3	NDUFA3	25.1469	24.1672	24.4922	24.3508	23.8053	23.557	23.5076	24.9055	24.6983	NaN	23.6486	23.745	24.5173	24.28	23.3748	24.4873	25.4905	24.4539	24.2506	24.1784	3	3	3	3	3	3	3	3	3	NaN	1	2	3	3	1	3	3	3	2	2
O95168-2;O95168	O95168-2;O95168	NADH dehydrogenase [ubiquinone] 1 beta subcomplex subunit 4	NDUFB4	24.8784	23.9604	24.0509	24.6198	NaN	23.274	23.8544	24.9436	23.8496	22.753	24.0542	23.927	NaN	24.0015	NaN	24.8855	25.0192	24.8789	24.1917	25.1259	2	1	2	1	NaN	2	2	2	2	1	2	1	NaN	1	NaN	1	2	2	1	1
O95169-3;O95169;O95169-2	O95169-3;O95169;O95169-2	NADH dehydrogenase [ubiquinone] 1 beta subcomplex subunit 8, mitochondrial	NDUFB8	25.1117	23.9444	23.5589	23.6921	23.3162	22.9501	23.4655	24.316	23.8297	NaN	23.3716	23.668	24.1218	23.6993	22.6685	24.7493	24.1232	23.782	NaN	23.9462	4	4	2	4	2	2	1	3	2	NaN	2	1	2	1	1	4	3	2	NaN	3
O95171-3;O95171-2;O95171	O95171-3;O95171-2;O95171	Sciellin	SCEL	NaN	NaN	NaN	NaN	NaN	NaN	NaN	NaN	NaN	NaN	NaN	NaN	NaN	NaN	23.8713	NaN	NaN	22.7148	NaN	NaN	NaN	NaN	NaN	NaN	NaN	NaN	NaN	NaN	NaN	NaN	NaN	NaN	NaN	NaN	5	NaN	NaN	3	NaN	NaN
O95182	O95182	NADH dehydrogenase [ubiquinone] 1 alpha subcomplex subunit 7	NDUFA7	25.4368	24.1658	24.2225	24.758	24.7292	24.0031	23.3999	24.2875	24.9578	23.142	24.5057	23.7653	25.0464	24.4273	23.6913	24.5037	25.4548	24.6087	25.2425	24.4209	5	3	4	5	4	4	4	4	6	1	5	4	5	6	3	4	5	6	3	5
O95183	O95183	Vesicle-associated membrane protein 5	VAMP5	NaN	NaN	NaN	NaN	NaN	NaN	22.5984	22.6353	NaN	NaN	NaN	NaN	NaN	NaN	NaN	NaN	NaN	NaN	NaN	NaN	NaN	NaN	NaN	NaN	NaN	NaN	2	1	NaN	NaN	NaN	NaN	NaN	NaN	NaN	NaN	NaN	NaN	1	NaN
O95197-3;O95197-5;O95197-4;O95197-7;O95197-2;O95197;O95197-6	O95197-3;O95197-5;O95197-4;O95197-7;O95197-2;O95197;O95197-6	Reticulon-3	RTN3	25.9125	26.7924	28.1483	27.2814	26.636	26.0543	26.7671	27.0633	25.1801	26.8534	26.4175	26.9771	26.769	27.5745	27.0348	26.7138	27.3217	25.9277	25.85	27.0616	2	3	2	2	2	2	2	3	3	2	3	3	3	3	3	3	2	3	1	3
O95202;O95202-2;O95202-3	O95202	LETM1 and EF-hand domain-containing protein 1, mitochondrial	LETM1	27.2202	26.5501	27.6118	27.0243	26.623	27.5382	27.1197	26.7287	27.0749	23.8773	27.0014	26.221	26.7788	26.0753	26.7111	27.0289	27.9529	27.3334	26.3592	27.5	17	12	17	18	14	17	15	19	18	1	16	13	16	11	16	16	18	17	7	18
O95210	O95210	Starch-binding domain-containing protein 1	STBD1	23.3913	NaN	NaN	22.8398	NaN	NaN	22.3967	22.3664	23.5411	NaN	NaN	NaN	NaN	22.1589	21.8759	NaN	22.29	NaN	NaN	22.3783	2	2	NaN	2	NaN	NaN	2	1	1	NaN	1	NaN	NaN	2	1	NaN	1	NaN	NaN	2
O95218-2;O95218	O95218-2;O95218	Zinc finger Ran-binding domain-containing protein 2	ZRANB2	24.4418	24.2084	23.8944	24.1951	23.2177	23.7463	23.478	24.5683	22.6107	NaN	24.0629	24.2513	23.7894	24.3616	24.4827	24.0993	24.7342	24.7229	23.6454	24.1375	3	2	4	2	4	2	2	2	2	NaN	2	2	2	3	2	3	6	2	3	2
O95219;O95219-2	O95219;O95219-2	Sorting nexin-4	SNX4	23.7592	24.5681	23.7115	24.4345	22.6847	22.5731	24.5057	25.5446	24.6537	NaN	24.5807	24.0725	24.8688	24.0459	23.4558	25.4422	23.4007	24.0433	NaN	24.6333	4	6	3	5	1	2	6	8	9	NaN	7	5	7	4	3	8	3	4	NaN	7
O95232;O95232-2	O95232	Luc7-like protein 3	LUC7L3	26.1095	25.6714	25.4534	26.2375	26.0272	26.1141	25.6232	26.3828	25.9888	NaN	25.3733	25.6521	25.5188	25.9425	25.8564	26.1456	26.0376	26.0932	25.681	25.8989	7	7	7	8	9	6	9	7	7	NaN	6	8	7	7	7	9	8	7	6	8
O95249;O95249-2	O95249;O95249-2	Golgi SNAP receptor complex member 1	GOSR1	23.5746	NaN	22.6005	NaN	22.9452	22.5923	23.3785	22.2972	23.3569	NaN	22.572	22.9567	23.4244	22.5535	23.1805	23.6256	22.3848	22.5805	22.9541	23.3584	2	NaN	2	NaN	3	1	3	1	3	1	3	1	2	3	3	2	2	2	1	2
O95251-2;O95251-4;O95251;O95251-3;O95251-5	O95251-2;O95251-4;O95251;O95251-3;O95251-5	Histone acetyltransferase KAT7	KAT7	NaN	21.7832	21.3813	22.1054	21.745	22.4418	22.3223	22.2523	22.4987	22.2412	22.9356	21.9795	NaN	21.8889	NaN	22.1719	NaN	22.1361	NaN	20.6704	NaN	1	1	1	1	1	1	1	2	1	1	2	NaN	1	NaN	1	NaN	3	NaN	1
O95274	O95274	Ly6/PLAUR domain-containing protein 3	LYPD3	NaN	NaN	NaN	NaN	NaN	NaN	NaN	NaN	NaN	NaN	NaN	NaN	NaN	NaN	23.8854	NaN	NaN	NaN	NaN	NaN	NaN	NaN	NaN	NaN	NaN	NaN	NaN	NaN	NaN	NaN	NaN	NaN	NaN	NaN	3	NaN	NaN	NaN	NaN	NaN
O95292;O95292-2	O95292	Vesicle-associated membrane protein-associated protein B/C	VAPB	26.4504	26.1598	26.1558	27.6299	26.0079	26.7459	26.074	26.5562	26.8571	24.9664	26.352	26.2479	26.3837	25.9231	26.0707	26.2006	26.702	26.22	25.9488	26.3734	6	8	5	10	6	9	6	5	9	1	7	5	8	5	6	5	4	8	4	7
O95294-4;O95294-3;O95294;O95294-2	O95294-4;O95294-3;O95294;O95294-2	RasGAP-activating-like protein 1	RASAL1	26.3174	NaN	22.3655	20.9246	NaN	NaN	20.5863	20.2806	20.5504	NaN	NaN	NaN	23.6686	NaN	21.3226	NaN	22.7598	NaN	NaN	19.9378	11	NaN	2	1	NaN	NaN	1	1	1	NaN	NaN	NaN	1	NaN	2	NaN	3	NaN	NaN	2
O95295	O95295	SNARE-associated protein Snapin	SNAPIN	22.0281	NaN	22.151	22.0776	22.0348	22.6212	22.119	22.2508	22.2619	NaN	22.2274	22.2121	22.3355	21.874	22.1434	22.4144	NaN	22.4455	22.2199	22.4356	1	NaN	1	1	1	1	1	1	1	NaN	1	1	1	1	1	1	NaN	1	1	1
O95297-2;O95297;O95297-5;O95297-3	O95297-2;O95297	Myelin protein zero-like protein 1	MPZL1	22.2723	22.5424	21.3994	NaN	22.1244	NaN	NaN	21.6347	NaN	NaN	NaN	22.159	NaN	NaN	22.1847	22.5959	22.6093	NaN	NaN	22.3445	2	1	2	NaN	1	NaN	NaN	1	NaN	NaN	NaN	1	NaN	NaN	1	2	2	2	NaN	1
O95298;O95298-2;E9PQ53	O95298;O95298-2	NADH dehydrogenase [ubiquinone] 1 subunit C2	NDUFC2	25.2301	23.763	24.5171	24.5054	24.1427	23.9529	24.2816	24.7809	24.5249	NaN	24.695	23.999	24.7	24.5134	23.5372	24.7807	25.3836	24.5564	24.277	24.7165	2	3	3	2	3	2	3	3	3	NaN	3	3	3	2	2	2	2	3	2	3
O95299;O95299-2	O95299;O95299-2	NADH dehydrogenase [ubiquinone] 1 alpha subcomplex subunit 10, mitochondrial	NDUFA10	27.4896	26.5288	26.264	26.6682	26.1785	26.1194	25.9511	26.486	26.5358	25.2598	26.0832	26.0494	26.9834	26.1635	25.7033	26.6807	27.5833	26.6391	26.1289	26.6202	6	7	8	8	6	6	7	7	8	2	6	8	7	7	7	8	6	6	6	8
O95302;O95302-3;O95302-2;Q75LS8	O95302;O95302-3	Peptidyl-prolyl cis-trans isomerase FKBP9	FKBP9	24.2396	26.698	26.888	25.5156	26.8731	27.5594	26.1509	25.7597	25.8514	26.0411	25.8615	26.5936	25.9257	25.5811	27.6037	26.0095	25.5978	26.5583	25.8447	25.7507	2	12	10	10	11	14	10	8	8	7	6	14	9	5	12	8	7	12	7	5
O95319-5;O95319-2;O95319;O95319-4;O95319-3	O95319-5;O95319-2;O95319;O95319-4;O95319-3	CUGBP Elav-like family member 2	CELF2	NaN	22.7117	NaN	NaN	22.177	NaN	NaN	NaN	22.6888	NaN	23.0175	22.4354	22.7853	NaN	NaN	22.1412	NaN	22.8348	NaN	23.0302	NaN	2	NaN	NaN	1	NaN	NaN	NaN	1	NaN	3	1	2	1	NaN	1	NaN	2	NaN	1
O95336	O95336	6-phosphogluconolactonase	PGLS	27.4341	27.8397	28.6458	28.5346	28.6542	28.9703	27.9209	28.1897	27.8112	27.3509	28.5855	28.1791	27.9805	28.3484	28.0969	27.7054	27.6034	27.8316	27.5344	27.6798	13	12	13	12	12	12	11	12	12	9	12	12	12	12	12	10	11	11	9	11
O95340;O95340-2	O95340;O95340-2	Bifunctional 3-phosphoadenosine 5-phosphosulfate synthase 2;Sulfate adenylyltransferase;Adenylyl-sulfate kinase	PAPSS2	24.2282	24.1623	21.8964	21.4839	24.2486	23.7506	23.4497	24.1599	24.0283	24.0958	22.3306	NaN	23.2347	22.0449	NaN	23.9329	22.0668	21.1427	25.151	NaN	6	6	1	1	7	6	2	6	4	4	1	NaN	1	2	NaN	5	1	1	4	NaN
O95347;O95347-2	O95347;O95347-2	Structural maintenance of chromosomes protein 2	SMC2	22.3237	22.8815	NaN	26.0175	24.0389	22.607	23.7442	24.2582	23.5735	NaN	NaN	NaN	NaN	NaN	NaN	24.383	NaN	24.8437	NaN	NaN	1	1	NaN	11	4	3	3	3	1	NaN	NaN	1	NaN	NaN	NaN	5	NaN	9	NaN	1
O95352;O95352-3;O95352-2	O95352;O95352-3;O95352-2	Ubiquitin-like modifier-activating enzyme ATG7	ATG7	25.6407	25.1963	24.381	25.0734	25.0089	24.6312	25.3521	25.4522	25.1435	24.2527	25.8029	24.9276	25.6748	25.736	24.7451	25.1964	23.6248	24.7937	25.4761	23.4488	11	8	5	11	8	5	12	9	7	4	12	6	12	10	6	7	1	5	4	6
O95359;O95359-3;O95359-6;O95359-1;O95359-5;O95359-2	O95359;O95359-3;O95359-6;O95359-1;O95359-5;O95359-2	Transforming acidic coiled-coil-containing protein 2	TACC2	NaN	NaN	22.8952	NaN	NaN	23.3569	NaN	NaN	23.725	NaN	NaN	23.5071	NaN	NaN	NaN	23.5064	23.663	NaN	NaN	NaN	1	1	2	1	NaN	2	NaN	NaN	2	NaN	1	2	1	NaN	1	1	1	1	NaN	NaN
O95363	O95363	Phenylalanine--tRNA ligase, mitochondrial	FARS2	NaN	NaN	21.1807	21.3883	NaN	NaN	NaN	21.2292	NaN	NaN	NaN	NaN	NaN	NaN	NaN	20.9098	21.5105	NaN	NaN	NaN	NaN	NaN	1	2	1	NaN	1	1	1	NaN	NaN	NaN	NaN	NaN	NaN	1	1	NaN	NaN	NaN
O95372	O95372	Acyl-protein thioesterase 2	LYPLA2	27.5924	26.4593	27.5213	26.3519	27.0858	26.6636	26.1653	26.9373	27.2778	26.0537	26.5557	26.76	26.7864	26.8688	26.8523	27.0285	26.4825	26.7388	26.7307	26.8903	5	5	5	5	7	7	6	5	6	3	6	6	6	5	4	5	3	7	5	5
O95373	O95373	Importin-7	IPO7	26.3659	27.245	27.4699	28.2814	27.519	27.1183	27.4363	27.8011	27.4176	25.9558	26.8829	26.9684	26.9515	26.9121	26.9883	27.4402	26.9588	27.8528	26.7863	27.3325	14	18	20	24	22	17	19	21	19	6	17	19	18	19	18	24	15	21	12	18
O95376	O95376	E3 ubiquitin-protein ligase ARIH2	ARIH2	NaN	NaN	NaN	22.3601	NaN	NaN	21.6442	NaN	NaN	NaN	NaN	NaN	NaN	NaN	NaN	NaN	NaN	NaN	NaN	NaN	NaN	NaN	NaN	2	NaN	NaN	1	NaN	NaN	NaN	NaN	NaN	NaN	NaN	NaN	NaN	NaN	NaN	NaN	NaN
O95379-2;O95379;O95379-4	O95379-2;O95379;O95379-4	Tumor necrosis factor alpha-induced protein 8	TNFAIP8	23.1621	24.4611	22.0741	22.993	24.2497	22.1105	24.8914	24.4354	22.4464	24.2277	NaN	23.3389	24.1389	23.9747	NaN	23.9337	NaN	NaN	25.2029	22.5106	2	2	1	2	2	1	2	2	1	2	NaN	2	2	2	NaN	2	NaN	1	3	1
O95394;O95394-4;O95394-3	O95394;O95394-4;O95394-3	Phosphoacetylglucosamine mutase	PGM3	26.9929	27.2089	27.0231	27.1436	27.1544	26.2153	26.5617	26.496	27.641	26.3819	26.4774	26.4723	26.8724	26.4977	25.3888	27.2041	25.9205	26.9087	25.3804	27.6009	15	14	13	11	14	9	14	9	15	3	10	10	14	12	6	13	6	11	5	15
O95395	O95395	Beta-1,3-galactosyl-O-glycosyl-glycoprotein beta-1,6-N-acetylglucosaminyltransferase 3	GCNT3	24.6642	NaN	NaN	NaN	NaN	NaN	NaN	NaN	NaN	NaN	NaN	NaN	NaN	NaN	NaN	NaN	NaN	NaN	NaN	NaN	8	NaN	NaN	NaN	NaN	NaN	NaN	NaN	NaN	NaN	NaN	NaN	NaN	NaN	NaN	NaN	NaN	NaN	NaN	NaN
O95396	O95396	Adenylyltransferase and sulfurtransferase MOCS3;Molybdopterin-synthase adenylyltransferase;Molybdopterin-synthase sulfurtransferase	MOCS3	NaN	NaN	23.2036	23.1555	NaN	22.6044	NaN	22.3085	22.6193	23.6346	NaN	NaN	NaN	22.0618	NaN	NaN	NaN	NaN	21.9439	NaN	NaN	NaN	2	2	NaN	1	NaN	1	2	1	NaN	NaN	NaN	1	NaN	NaN	NaN	NaN	1	NaN
O95400	O95400	CD2 antigen cytoplasmic tail-binding protein 2	CD2BP2	NaN	21.8962	NaN	22.2008	22.4019	22.1585	21.9417	21.8931	22.8236	NaN	22.7838	22.5245	22.0393	21.7148	22.4091	22.4055	24.9527	21.8466	21.589	21.4565	NaN	2	NaN	2	1	1	2	2	2	NaN	6	2	1	2	1	4	1	3	2	3
O95406	O95406	Protein cornichon homolog 1	CNIH1	23.4371	23.3388	23.3133	22.7408	23.0908	23.4884	23.739	22.9072	22.9144	NaN	23.4154	22.7772	23.6278	NaN	23.1117	23.0956	23.2292	23.0346	NaN	22.8597	2	1	2	2	1	1	1	1	2	NaN	2	1	2	NaN	1	1	1	2	NaN	1
O95407	O95407	Tumor necrosis factor receptor superfamily member 6B	TNFRSF6B	NaN	NaN	NaN	NaN	NaN	NaN	NaN	NaN	NaN	23.6726	NaN	NaN	NaN	NaN	NaN	NaN	NaN	NaN	NaN	NaN	NaN	NaN	NaN	NaN	NaN	NaN	NaN	NaN	NaN	1	NaN	NaN	NaN	NaN	NaN	NaN	NaN	NaN	NaN	NaN
O95415	O95415	Brain protein I3	BRI3	NaN	NaN	22.6189	20.4383	21.3703	NaN	NaN	20.7404	NaN	NaN	NaN	NaN	NaN	22.0531	21.1969	NaN	NaN	NaN	NaN	NaN	NaN	NaN	1	1	1	NaN	NaN	1	NaN	NaN	NaN	NaN	NaN	1	1	NaN	NaN	NaN	NaN	NaN
O95425-4;O95425;O95425-3;O95425-2	O95425-4;O95425;O95425-3;O95425-2	Supervillin	SVIL	23.6643	24.9806	23.1726	24.2526	23.9443	26.2338	23.8161	24.143	23.6844	22.7626	22.8204	25.0873	23.3199	22.9537	24.0033	22.8997	23.5629	23.682	23.4672	23.2419	4	14	4	12	7	15	7	6	4	2	3	10	2	3	7	3	3	5	1	4
O95428;O95428-4;O95428-6;O95428-5;O95428-2;O95428-3	O95428;O95428-4;O95428-6;O95428-5	Papilin	PAPLN	NaN	NaN	NaN	18.0404	NaN	NaN	NaN	NaN	26.3879	NaN	NaN	NaN	NaN	NaN	NaN	NaN	NaN	NaN	18.7723	NaN	NaN	NaN	NaN	1	NaN	NaN	NaN	NaN	11	NaN	NaN	NaN	NaN	NaN	NaN	NaN	NaN	NaN	1	NaN
O95433;O95433-2	O95433;O95433-2	Activator of 90 kDa heat shock protein ATPase homolog 1	AHSA1	30.11	28.9912	30.323	29.3357	30.4075	29.8316	29.0227	29.3464	29.9484	26.9477	30.3878	28.9624	29.0839	29.1872	29.5154	29.8007	29.3244	30.2908	28.6709	28.8746	12	12	12	10	12	10	10	12	11	6	12	9	8	10	10	12	8	13	6	7
O95436-2;O95436	O95436-2;O95436	Sodium-dependent phosphate transport protein 2B	SLC34A2	24.9059	25.1291	24.4447	25.8056	28.3101	25.1761	25.6419	28.0188	26.3453	23.6039	21.8612	24.6752	25.4991	26.0513	26.5537	25.0796	26.4645	22.9469	25.7475	24.6257	7	7	6	9	12	7	9	12	10	1	1	4	6	8	8	4	9	2	6	4
O95445;O95445-2	O95445;O95445-2	Apolipoprotein M	APOM	25.4279	24.5256	24.975	23.575	24.5378	24.3549	22.7572	24.5164	24.6664	26.6557	24.2873	24.8415	23.6363	25.4996	24.0604	23.8793	24.8707	24.3935	24.6047	23.8519	6	4	6	3	5	3	1	4	5	5	3	3	1	5	2	2	4	2	4	2
O95453-2;O95453;O95453-3;O95453-4	O95453-2;O95453;O95453-3;O95453-4	Poly(A)-specific ribonuclease PARN	PARN	23.0542	22.3454	23.2838	22.7821	23.1923	22.9476	22.6319	NaN	22.6498	NaN	24.1615	22.8605	22.6775	22.9586	22.7549	23.0216	23.2066	23.0679	NaN	22.8942	2	1	4	4	2	3	1	NaN	2	NaN	5	2	1	1	2	2	1	4	2	1
O95456-2;O95456	O95456-2;O95456	Proteasome assembly chaperone 1	PSMG1	23.4839	22.9326	23.1998	22.9479	23.524	22.9815	22.4263	22.9444	22.7057	NaN	22.6371	NaN	22.8798	NaN	22.7813	23.7417	23.277	23.4081	22.8646	22.9092	3	2	3	3	4	3	1	4	2	NaN	2	NaN	1	NaN	1	3	2	2	1	2
O95466-2;O95466;O95466-3	O95466-2;O95466;O95466-3	Formin-like protein 1	FMNL1	NaN	24.5846	NaN	23.4838	24.6606	NaN	24.1759	24.95	NaN	NaN	NaN	22.0304	23.9955	24.7338	23.1668	23.3104	NaN	22.7199	25.6822	22.0633	NaN	8	NaN	4	6	NaN	8	9	NaN	NaN	NaN	1	5	6	1	6	NaN	1	8	2
O95470	O95470	Sphingosine-1-phosphate lyase 1	SGPL1	24.8899	26.6603	27.306	25.3573	26.1327	25.5795	26.7786	27.2841	25.3547	24.8375	28.906	26.6763	26.7493	25.8316	25.1531	26.5396	26.1608	26.5359	25.5894	26.3761	5	13	15	8	14	9	13	15	8	2	16	15	14	6	8	12	9	14	4	11
O95471-2;O95471	O95471-2;O95471	Claudin-7	CLDN7	24.394	NaN	23.4626	25.8897	24.253	NaN	23.4751	23.9066	23.3209	NaN	24.917	23.6805	23.0502	23.1096	23.9143	NaN	25.2132	23.5783	NaN	23.2383	2	NaN	1	2	2	NaN	2	2	1	NaN	2	2	2	1	2	NaN	2	2	NaN	1
O95479	O95479	GDH/6PGL endoplasmic bifunctional protein;Glucose 1-dehydrogenase;6-phosphogluconolactonase	H6PD	26.4751	26.632	27.3159	28.8293	26.4993	27.056	25.9909	25.183	25.4998	24.0108	26.3143	26.3876	26.2506	26.4968	26.0483	26.5405	25.943	24.7896	26.4878	26.3002	18	13	21	25	14	18	9	10	9	1	13	14	13	14	15	11	9	8	12	13
O95486;O95486-2	O95486	Protein transport protein Sec24A	SEC24A	23.2374	24.7529	22.8592	23.4018	23.439	NaN	24.6662	24.1253	23.6845	NaN	22.906	23.1361	23.5681	23.4561	NaN	23.9924	NaN	23.5072	23.7142	23.5622	3	8	1	3	3	1	10	6	5	NaN	3	3	4	4	2	4	1	4	2	2
O95487-2;O95487;O95487-3	O95487-2;O95487;O95487-3	Protein transport protein Sec24B	SEC24B	23.3617	23.2028	22.4807	23.3384	23.0378	22.9561	23.3495	23.5672	22.6284	22.8338	23.0848	22.567	23.4266	22.9252	24.2508	23.3807	NaN	23.3955	23.0696	23.1709	4	3	3	5	4	4	3	6	4	1	4	4	5	4	7	6	NaN	5	3	2
O95490-3;O95490-4;O95490-2;O95490-5;O95490;O95490-7;O95490-6	O95490-3;O95490-4;O95490-2;O95490-5;O95490;O95490-7;O95490-6	Latrophilin-2	LPHN2	NaN	NaN	22.6903	21.3017	NaN	21.7388	NaN	NaN	22.6349	NaN	NaN	NaN	21.4864	21.6499	NaN	NaN	NaN	21.5278	NaN	NaN	NaN	NaN	2	2	NaN	1	NaN	NaN	2	NaN	NaN	NaN	1	1	NaN	NaN	NaN	1	NaN	NaN
O95497;Q9NY84-5;Q9NY84-2;Q9NY84	O95497	Pantetheinase	VNN1	25.1835	16.5359	NaN	NaN	NaN	17.5559	NaN	NaN	29.6505	NaN	NaN	18.5721	19.5046	21.3326	18.1533	20.6712	22.7587	17.0643	18.3986	17.4877	10	1	NaN	NaN	NaN	2	NaN	NaN	11	NaN	NaN	1	2	3	1	1	7	1	1	1
O95498;O95498-6;O95498-5;O95498-3;O95498-4;O95498-2	O95498;O95498-6	Vascular non-inflammatory molecule 2	VNN2	NaN	NaN	NaN	NaN	NaN	NaN	NaN	NaN	NaN	NaN	NaN	NaN	NaN	24.5393	NaN	NaN	NaN	NaN	23.7958	NaN	NaN	NaN	NaN	NaN	NaN	NaN	NaN	NaN	NaN	NaN	NaN	NaN	NaN	3	NaN	NaN	NaN	NaN	3	NaN
O95544-3;O95544;O95544-2	O95544-3;O95544;O95544-2	NAD kinase	NADK	NaN	NaN	NaN	NaN	NaN	NaN	NaN	NaN	NaN	NaN	NaN	NaN	21.5738	22.5467	NaN	NaN	NaN	NaN	22.6478	NaN	NaN	NaN	NaN	NaN	NaN	NaN	NaN	NaN	NaN	NaN	NaN	NaN	1	1	NaN	NaN	NaN	NaN	1	NaN
O95563	O95563	Mitochondrial pyruvate carrier 2	MPC2	24.4713	23.8236	24.1838	24.649	23.8851	23.392	23.9169	23.8157	26.2852	NaN	23.8663	23.6329	24.5174	24.8031	24.3756	23.754	24.3245	22.369	NaN	23.7966	3	2	2	2	3	1	3	2	5	NaN	2	2	3	2	2	2	3	1	NaN	2
O95571	O95571	Persulfide dioxygenase ETHE1, mitochondrial	ETHE1	26.345	26.2997	25.9125	25.6551	24.6418	23.4661	26.3887	25.486	28.2412	NaN	25.9233	26.1867	27.0168	26.126	26.8298	25.3657	26.9303	26.4549	26.3834	26.9836	10	7	8	7	4	1	7	5	10	NaN	7	7	9	8	7	7	9	7	5	7
O95573	O95573	Long-chain-fatty-acid--CoA ligase 3	ACSL3	23.1338	25.5984	25.1611	27.0807	25.1073	24.6495	25.907	25.8106	23.02	NaN	26.7412	24.9997	25.2768	24.1391	25.3689	26.7335	25.207	24.9051	24.143	25.4765	4	13	10	15	9	6	10	10	2	NaN	15	5	8	5	7	16	8	9	2	8
O95602	O95602	DNA-directed RNA polymerase I subunit RPA1	POLR1A	23.3729	22.0723	22.5618	21.7591	22.3218	22.1384	22.1125	22.6122	NaN	NaN	NaN	22.3201	NaN	22.1082	21.8294	22.6328	22.884	22.4876	NaN	22.5602	2	1	1	1	2	1	1	1	NaN	NaN	NaN	2	NaN	1	1	2	1	2	NaN	1
O95630;O95630-2	O95630;O95630-2	STAM-binding protein	STAMBP	24.4454	23.1008	25.073	24.0439	23.3789	24.1342	22.7725	24.4586	24.0911	23.2308	24.5578	24.5971	24.7369	24.1716	24.0824	24.9413	24.2508	24.7435	24.4011	24.4275	6	2	6	5	2	4	2	5	7	1	7	6	5	4	3	7	7	6	5	6
O95633-2;O95633	O95633-2;O95633	Follistatin-related protein 3	FSTL3	NaN	NaN	NaN	NaN	NaN	NaN	NaN	NaN	NaN	NaN	23.3926	NaN	NaN	NaN	NaN	NaN	NaN	NaN	NaN	NaN	NaN	NaN	NaN	NaN	NaN	NaN	NaN	NaN	NaN	NaN	2	NaN	NaN	NaN	NaN	NaN	NaN	NaN	NaN	NaN
O95639-3;O95639-2;O95639	O95639-3;O95639-2;O95639	Cleavage and polyadenylation specificity factor subunit 4	CPSF4	23.4405	22.6696	NaN	23.2575	22.9895	23.5671	23.0339	23.1728	23.0287	NaN	23.1246	23.3031	22.9886	23.2316	22.4155	23.5144	23.2604	23.2706	22.6802	22.839	2	1	1	2	1	1	2	1	1	NaN	1	1	2	2	2	2	2	1	1	1
O95671;O95671-2	O95671;O95671-2	N-acetylserotonin O-methyltransferase-like protein	ASMTL	25.3126	24.7641	25.7896	25.6289	24.5765	25.4123	25.6735	25.0452	23.0676	22.8139	26.4059	24.7958	24.6084	25.6635	23.7455	24.7998	25.0788	25.6843	25.1113	24.5228	8	9	9	10	6	9	11	7	2	2	13	4	6	11	4	6	5	10	7	5
O95674	O95674	Phosphatidate cytidylyltransferase 2	CDS2	23.5643	24.2953	24.5619	23.7726	24.3219	24.617	24.7603	23.8134	24.0808	24.4005	24.3461	24.4369	24.5745	24.5513	24.7122	24.5784	24.8052	23.7328	24.67	24.5063	3	3	3	4	5	5	3	3	4	1	4	4	4	3	5	5	3	3	4	4
O95684-2;O95684;O95684-3	O95684-2;O95684;O95684-3	FGFR1 oncogene partner	FGFR1OP	22.5861	21.7901	21.8044	22.3334	22.3264	22.7342	NaN	22.1006	22.4763	NaN	NaN	22.1246	NaN	NaN	NaN	22.0922	NaN	22.3501	NaN	21.7032	2	1	1	1	1	2	NaN	2	1	NaN	NaN	1	NaN	NaN	NaN	1	NaN	2	NaN	2
O95707	O95707	Ribonuclease P protein subunit p29	POP4	NaN	NaN	NaN	19.7652	19.4594	NaN	NaN	NaN	NaN	NaN	18.432	NaN	NaN	NaN	20.1661	NaN	NaN	NaN	20.5412	NaN	NaN	NaN	NaN	1	1	NaN	NaN	NaN	NaN	NaN	1	NaN	NaN	NaN	1	1	NaN	NaN	1	NaN
O95716;Q96E17	O95716	Ras-related protein Rab-3D	RAB3D	27.8638	25.5203	26.1486	26.2978	26.7904	25.9304	26.3332	26.7742	25.1707	25.6563	26.0045	26.0504	27.3988	28.7135	26.8417	26.5324	27.2398	26.2292	26.438	28.2381	8	5	5	6	7	3	6	7	5	3	4	3	8	8	7	6	6	5	7	7
O95721	O95721	Synaptosomal-associated protein 29	SNAP29	22.744	24.3911	24.2713	24.2145	24.3919	NaN	22.5239	24.2513	26.2046	NaN	24.3292	NaN	24.5572	24.5787	24.3651	24.5281	25.7253	NaN	24.5335	NaN	2	1	2	2	2	NaN	2	1	2	NaN	1	NaN	1	2	1	1	1	NaN	1	NaN
O95747	O95747	Serine/threonine-protein kinase OSR1	OXSR1	26.6118	26.0071	26.2085	26.6632	26.4269	26.3377	26.2542	26.2267	26.6628	25.7665	26.5632	26.1405	25.7832	26.1929	26.1642	26.0619	26.2252	26.4489	25.9776	25.935	14	11	14	15	13	9	13	13	10	3	12	10	11	10	11	11	6	12	9	11
O95749;O95749-2	O95749;O95749-2	Geranylgeranyl pyrophosphate synthase	GGPS1	23.1983	22.4524	22.9977	22.3556	22.6279	NaN	NaN	22.3178	22.9224	NaN	NaN	22.5476	22.6019	22.8549	24.0019	23.7483	23.1577	NaN	NaN	23.435	2	1	3	2	1	NaN	NaN	1	1	NaN	NaN	1	2	2	4	3	2	NaN	NaN	3
O95757	O95757	Heat shock 70 kDa protein 4L	HSPA4L	24.1225	22.3327	24.0461	24.3773	23.8128	24.078	24.2362	23.9935	24.0553	NaN	24.3464	23.0536	NaN	NaN	NaN	23.2154	NaN	26.2513	22.9763	NaN	9	2	1	1	6	1	1	3	3	NaN	5	1	NaN	NaN	NaN	3	NaN	15	1	NaN
O95758;O95758-5;O95758-1;O95758-6;O95758-2;O95758-4;O95758-7	O95758;O95758-5;O95758-1;O95758-6;O95758-2;O95758-4;O95758-7	Polypyrimidine tract-binding protein 3	PTBP3	24.4737	23.8694	23.3147	25.9509	23.9436	21.7237	24.7022	24.1788	23.911	NaN	24.6335	24.8871	23.6327	24.4584	24.5537	24.5049	24.7796	24.9044	23.1128	25.2474	5	3	2	10	4	1	6	3	2	NaN	6	5	3	3	5	6	4	6	1	8
O95759	O95759	TBC1 domain family member 8	TBC1D8	NaN	NaN	NaN	19.0723	NaN	NaN	NaN	18.4946	18.6083	NaN	20.1111	18.5986	19.3606	19.616	NaN	NaN	19.0877	18.3497	19.8179	19.0825	NaN	NaN	NaN	1	NaN	NaN	NaN	1	1	NaN	1	1	1	1	NaN	NaN	1	1	1	1
O95760-3;O95760-2;O95760;O95760-4	O95760-3;O95760-2;O95760;O95760-4	Interleukin-33;Interleukin-33 (95-270);Interleukin-33 (99-270);Interleukin-33 (109-270)	IL33	NaN	NaN	NaN	NaN	NaN	NaN	NaN	NaN	NaN	NaN	NaN	NaN	23.0684	23.7724	NaN	NaN	NaN	NaN	NaN	NaN	NaN	NaN	NaN	NaN	NaN	NaN	NaN	NaN	NaN	NaN	NaN	NaN	1	3	NaN	NaN	NaN	NaN	NaN	NaN
O95777	O95777	U6 snRNA-associated Sm-like protein LSm8	LSM8	25.9199	25.1705	25.4141	26.632	25.3635	25.4819	25.3456	25.5682	24.8751	23.4791	25.4002	25.6558	25.1312	25.1911	25.8834	25.1907	25.9158	25.4945	24.6882	25.5552	5	3	5	4	4	4	2	4	2	2	3	4	3	3	3	3	3	3	2	3
O95782-2;O95782	O95782-2;O95782	AP-2 complex subunit alpha-1	AP2A1	27.7015	28.835	28.0185	27.6758	28.5513	28.5017	28.26	28.1712	28.3873	28.3373	28.0934	28.2846	28.2889	28.2635	28.0945	28.3787	28.0226	28.0494	28.1682	27.7949	27	33	30	27	31	31	29	29	26	22	27	31	29	29	24	31	22	32	21	23
O95785-2;O95785-4;O95785-3;O95785	O95785-2;O95785-4;O95785-3;O95785	Protein Wiz	WIZ	NaN	NaN	NaN	21.6511	NaN	22.3702	NaN	NaN	NaN	NaN	NaN	NaN	NaN	NaN	NaN	NaN	NaN	21.5861	NaN	NaN	NaN	NaN	NaN	1	NaN	1	NaN	NaN	NaN	NaN	NaN	NaN	NaN	NaN	NaN	NaN	NaN	1	NaN	NaN
O95786;O95786-2	O95786;O95786-2	Probable ATP-dependent RNA helicase DDX58	DDX58	24.1064	26.1008	26.8454	28.8899	28.1437	25.3984	26.2944	28.8641	23.3149	24.8963	26.1718	25.9417	26.6521	25.6794	26.7857	26.3075	24.4462	24.6728	25.9094	23.9949	5	16	23	35	31	14	19	33	4	5	16	11	17	8	17	12	5	8	7	4
O95793-2;O95793-3;O95793	O95793-2;O95793-3;O95793	Double-stranded RNA-binding protein Staufen homolog 1	STAU1	25.0226	25.3301	25.0586	25.6906	24.4314	24.8792	24.9461	25.7085	24.9942	25.0341	24.8169	24.6644	23.8617	24.8804	24.3281	24.9344	25.0876	25.4499	24.5743	24.5147	6	9	7	9	5	7	6	8	6	1	7	4	4	8	5	6	6	8	2	5
O95810	O95810	Serum deprivation-response protein	SDPR	NaN	22.3266	NaN	NaN	23.7192	24.7391	NaN	NaN	20.7659	19.7232	23.8275	23.7611	24.6207	24.227	20.23	NaN	23.7524	NaN	23.5443	22.7852	NaN	1	NaN	NaN	3	5	NaN	NaN	2	1	4	5	5	4	1	NaN	2	NaN	2	2
O95816;O95816-2	O95816;O95816-2	BAG family molecular chaperone regulator 2	BAG2	22.7713	25.2506	24.8534	24.4156	26.0993	26.3715	23.839	24.1582	24.8184	24.4269	23.2188	25.7073	24.9752	24.4156	25.515	25.1787	NaN	26.7366	23.7045	24.4576	1	7	3	3	5	5	2	4	4	2	3	5	5	3	5	4	NaN	6	2	4
O95817	O95817	BAG family molecular chaperone regulator 3	BAG3	22.5516	23.0771	NaN	21.5604	22.5891	NaN	23.2753	NaN	21.4387	NaN	25.207	23.5261	22.8095	NaN	23.0978	19.2027	NaN	22.8362	25.1989	23.4859	2	2	NaN	1	3	1	7	NaN	4	NaN	7	4	3	NaN	2	1	NaN	5	2	2
O95819-4;O95819-2;O95819;O95819-5;O95819-6;O95819-3;Q9UKE5-8;Q9UKE5-5;Q9UKE5-7;Q9UKE5-3;Q9UKE5-6;Q9UKE5-2;Q9UKE5-4;Q9UKE5	O95819-4;O95819-2;O95819;O95819-5;O95819-6;O95819-3	Mitogen-activated protein kinase kinase kinase kinase 4	MAP4K4	20.9909	22.5002	NaN	20.8317	NaN	NaN	NaN	NaN	22.1876	NaN	NaN	NaN	NaN	21.8626	NaN	21.9322	21.6189	22.5758	NaN	NaN	2	2	NaN	1	NaN	1	NaN	1	2	NaN	NaN	NaN	1	1	NaN	3	1	1	NaN	NaN
O95822-2;O95822	O95822-2;O95822	Malonyl-CoA decarboxylase, mitochondrial	MLYCD	24.0266	NaN	23.6836	22.9677	NaN	NaN	NaN	NaN	23.692	NaN	23.9179	NaN	23.099	23.4795	23.1823	NaN	24.1915	22.9869	NaN	NaN	4	NaN	4	1	NaN	NaN	NaN	NaN	4	NaN	6	NaN	1	2	2	NaN	5	1	NaN	NaN
O95831;O95831-3;O95831-2;O95831-5;O95831-4;O95831-6	O95831;O95831-3;O95831-2;O95831-5	Apoptosis-inducing factor 1, mitochondrial	AIFM1	30.3433	27.9911	28.7155	30.1091	28.1892	28.1402	29.4419	29.0087	27.044	25.8652	29.0709	28.2964	28.5447	28.217	28.3312	28.3447	30.516	28.4267	28.6587	28.6207	24	17	22	23	16	17	20	20	14	6	21	19	21	22	18	20	23	20	24	21
O95832	O95832	Claudin-1	CLDN1	NaN	NaN	NaN	21.9965	NaN	23.3017	22.1999	NaN	23.7671	NaN	NaN	NaN	NaN	NaN	NaN	NaN	NaN	NaN	NaN	NaN	1	NaN	1	2	1	2	2	1	3	1	NaN	NaN	1	1	NaN	NaN	NaN	1	NaN	1
O95833	O95833	Chloride intracellular channel protein 3	CLIC3	NaN	NaN	25.3587	NaN	23.6509	NaN	NaN	NaN	NaN	NaN	26.6865	NaN	NaN	NaN	25.7852	NaN	NaN	23.0898	NaN	NaN	NaN	NaN	6	NaN	4	NaN	NaN	NaN	NaN	NaN	9	NaN	NaN	NaN	7	NaN	NaN	3	NaN	NaN
O95834;O95834-2;O95834-3;Q05BV3-4;Q05BV3-2	O95834;O95834-2;O95834-3	Echinoderm microtubule-associated protein-like 2	EML2	26.2128	25.2276	25.3156	25.4798	25.3884	23.3403	25.7756	24.5791	27.316	24.2228	26.8316	25.9196	26.5169	25.8195	25.7264	25.8664	26.0458	24.8073	25.5315	26.1573	9	9	8	9	7	1	8	3	11	1	11	9	12	7	8	9	8	6	7	8
O95848	O95848	Uridine diphosphate glucose pyrophosphatase	NUDT14	22.363	22.5965	24.4672	22.5204	22.7689	22.894	22.6022	22.4526	23.1839	NaN	23.6574	NaN	22.4911	22.7833	23.0502	NaN	22.7089	22.8057	NaN	NaN	1	2	3	1	1	1	1	2	2	NaN	2	NaN	2	1	1	NaN	1	1	NaN	NaN
O95857	O95857	Tetraspanin-13	TSPAN13	NaN	NaN	NaN	NaN	21.4475	NaN	21.0372	NaN	23.2245	NaN	NaN	NaN	22.3723	24.2521	21.9132	23.1736	23.3359	23.2352	23	24.4671	NaN	NaN	NaN	NaN	1	NaN	1	NaN	1	NaN	NaN	NaN	1	2	1	1	1	1	1	2
O95858	O95858	Tetraspanin-15	TSPAN15	22.3051	NaN	22.0823	21.6511	NaN	NaN	22.5115	22.0323	NaN	NaN	NaN	22.4178	21.9601	NaN	22.3018	NaN	NaN	21.9589	NaN	21.6126	2	NaN	1	1	NaN	NaN	1	1	NaN	NaN	NaN	1	1	NaN	1	1	NaN	1	NaN	1
O95861;O95861-2;O95861-3;O95861-4	O95861;O95861-2;O95861-3;O95861-4	3(2),5-bisphosphate nucleotidase 1	BPNT1	29.3686	26.2082	26.7358	26.7648	26.8961	26.1308	25.8206	26.8743	27.2458	NaN	26.571	26.2899	26.2863	26.8808	28.3475	27.4465	27.8863	26.1286	26.3891	27.9412	19	12	13	13	13	8	10	13	13	NaN	11	10	10	11	16	15	13	12	8	15
O95864-4;O95864-2;O95864;O95864-3	O95864-4;O95864-2;O95864;O95864-3	Fatty acid desaturase 2	FADS2	NaN	22.9093	NaN	NaN	NaN	NaN	NaN	24.4751	NaN	NaN	NaN	NaN	NaN	NaN	22.5031	23.9465	NaN	23.5193	NaN	NaN	NaN	2	NaN	NaN	NaN	NaN	NaN	2	NaN	NaN	NaN	NaN	NaN	NaN	1	3	NaN	2	NaN	NaN
O95865	O95865	N(G),N(G)-dimethylarginine dimethylaminohydrolase 2	DDAH2	25.5885	27.3173	26.0946	27.7886	26.9966	27.9198	26.9495	26.3637	26.175	25.5773	26.6787	27.8994	27.3813	26.1496	27.1036	26.1754	25.6848	26.8399	27.033	27.0818	6	8	6	9	9	9	8	8	5	3	8	9	9	4	8	7	4	8	8	7
O95867	O95867	Lymphocyte antigen 6 complex locus protein G6c	LY6G6C	NaN	NaN	NaN	NaN	NaN	NaN	NaN	NaN	21.7184	NaN	NaN	25.6456	25.3681	NaN	26.683	22.7811	NaN	22.9434	NaN	25.3433	NaN	NaN	NaN	NaN	NaN	NaN	NaN	NaN	1	NaN	NaN	2	2	NaN	2	1	NaN	1	NaN	2
O95870;O95870-2	O95870;O95870-2	Abhydrolase domain-containing protein 16A	ABHD16A	25.0236	24.3089	24.8018	25.7823	25.3038	24.5763	25.3767	25.4802	24.1794	NaN	24.7795	24.9015	25.611	24.6076	25.2371	25.4312	24.9154	24.7216	24.494	25.9349	4	3	7	6	6	6	10	8	4	NaN	5	5	8	5	6	8	5	7	3	10
O95881	O95881	Thioredoxin domain-containing protein 12	TXNDC12	25.3878	25.7834	25.0224	25.6819	25.7052	25.2292	25.1492	24.9225	26.2486	24.4947	25.1997	25.5863	25.4232	24.1666	26.5345	26.0553	25.7326	25.5927	25.5681	25.4721	2	4	3	3	4	4	4	3	4	3	3	4	4	1	7	5	4	5	4	3
O95967	O95967	EGF-containing fibulin-like extracellular matrix protein 2	EFEMP2	22.8896	26.5633	27.379	24.7647	26.6764	27.7679	26.1508	25.1672	25.1892	27.7673	25.6323	26.9248	26.8525	25.7663	26.7928	24.7745	24.6439	24.4041	25.1877	26.5458	2	7	11	5	9	12	8	5	5	10	5	9	11	7	11	2	4	3	2	9
O95969	O95969	Secretoglobin family 1D member 2	SCGB1D2	24.3164	NaN	NaN	NaN	NaN	NaN	21.9261	NaN	NaN	NaN	21.6243	NaN	27.3388	26.6105	NaN	24.5865	NaN	NaN	NaN	24.7598	1	NaN	NaN	NaN	NaN	NaN	1	NaN	NaN	NaN	1	NaN	2	2	NaN	2	NaN	1	NaN	2
O95980	O95980	Reversion-inducing cysteine-rich protein with Kazal motifs	RECK	NaN	NaN	NaN	NaN	20.6056	21.0664	NaN	NaN	NaN	NaN	19.878	NaN	NaN	NaN	NaN	NaN	NaN	NaN	NaN	NaN	NaN	NaN	NaN	NaN	1	1	NaN	NaN	NaN	NaN	1	NaN	NaN	NaN	NaN	NaN	NaN	NaN	NaN	NaN
O95983-2;O95983	O95983-2;O95983	Methyl-CpG-binding domain protein 3	MBD3	22.2618	22.6535	22.5074	22.5735	22.7586	23.4822	22.4393	22.1673	NaN	NaN	21.9312	22.4627	22.3831	22.3697	NaN	22.6119	NaN	23.4209	NaN	22.8478	1	3	1	3	2	4	1	3	NaN	NaN	1	3	1	1	NaN	3	NaN	4	NaN	2
O95989	O95989	Diphosphoinositol polyphosphate phosphohydrolase 1	NUDT3	23.3661	NaN	22.8826	22.8249	23.0574	23.1959	22.8864	22.5295	23.7425	NaN	23.0294	23.0163	23.2152	23.0092	23.1196	22.8204	22.9083	22.9182	23.2706	NaN	1	NaN	2	1	2	2	3	2	2	NaN	1	2	2	2	2	2	1	2	2	1
O95994	O95994	Anterior gradient protein 2 homolog	AGR2	31.1056	25.0544	25.0387	21.6015	27.5718	24.8588	NaN	21.6131	27.887	NaN	28.1239	27.7091	28.1729	29.7476	NaN	28.9364	29.5599	28.0615	30.4201	31.2944	7	5	4	1	7	4	NaN	2	7	NaN	7	6	7	7	NaN	7	6	7	7	8
O95999	O95999	B-cell lymphoma/leukemia 10	BCL10	22.0974	22.1501	21.8274	NaN	NaN	21.692	22.2186	22.3021	NaN	NaN	21.5043	NaN	21.8099	21.8767	22.1892	22.1447	21.8242	22.2145	22.0919	22.1261	2	2	1	1	NaN	1	2	2	NaN	NaN	1	1	2	1	2	2	2	2	1	1
O96000;O96000-2	O96000;O96000-2	NADH dehydrogenase [ubiquinone] 1 beta subcomplex subunit 10	NDUFB10	27.2794	25.7797	26.4955	26.0145	25.5047	25.2502	25.6713	26.2066	25.6877	24.0021	25.7345	25.1447	26.2911	25.4666	25.1712	25.9475	26.6143	25.9554	25.2209	25.9927	8	5	6	7	6	5	6	6	6	2	6	5	6	6	4	5	7	7	2	5
O96005;O96005-3	O96005;O96005-3	Cleft lip and palate transmembrane protein 1	CLPTM1	23.4496	24.8864	25.0446	24.8829	24.4154	23.7873	24.4085	24.7612	24.2897	23.4325	23.8129	23.9793	24.5005	24.3476	23.8082	24.7175	23.6792	24.633	23.914	24.2113	4	5	6	5	6	2	5	6	4	2	3	4	2	3	5	6	2	5	2	6
O96008;O96008-2	O96008;O96008-2	Mitochondrial import receptor subunit TOM40 homolog	TOMM40	26.0603	26.1207	26.471	25.5324	26.396	26.1606	25.8618	25.7513	26.166	NaN	25.9522	25.1655	25.2551	25.6451	25.4563	26.1491	26.4292	26.8547	25.4967	26.0665	8	8	7	6	7	7	7	8	8	NaN	7	6	4	6	5	8	7	9	5	7
O96009	O96009	Napsin-A	NAPSA	NaN	NaN	NaN	NaN	NaN	NaN	NaN	NaN	27.1688	NaN	NaN	NaN	NaN	NaN	26.029	NaN	NaN	NaN	NaN	NaN	NaN	NaN	NaN	NaN	NaN	NaN	NaN	NaN	4	NaN	NaN	NaN	NaN	NaN	3	NaN	NaN	NaN	NaN	NaN
O96011;O96011-2	O96011;O96011-2	Peroxisomal membrane protein 11B	PEX11B	24.3035	23.4122	25.9619	23.9993	24.0497	NaN	23.5608	24.2782	24.611	NaN	24.4983	23.8213	23.7658	23.9259	NaN	24.7956	24.1625	24.1216	23.3679	25.2868	4	3	7	5	4	NaN	4	5	4	NaN	3	2	4	4	NaN	5	4	2	2	6
O96013;O96013-4;O96013-3;Q9P286	O96013;O96013-4;O96013-3	Serine/threonine-protein kinase PAK 4	PAK4	NaN	NaN	23.2745	23.9457	22.8276	NaN	NaN	NaN	NaN	NaN	23.1057	NaN	NaN	NaN	NaN	NaN	NaN	22.7474	NaN	22.8678	NaN	NaN	3	4	2	NaN	NaN	NaN	NaN	NaN	1	NaN	NaN	NaN	NaN	NaN	1	2	NaN	1
O96017-12;O96017;O96017-9;O96017-6;O96017-5;O96017-11;O96017-2;O96017-8;O96017-13;O96017-7;O96017-4	O96017-12;O96017;O96017-9;O96017-6;O96017-5;O96017-11;O96017-2;O96017-8;O96017-13;O96017-7;O96017-4	Serine/threonine-protein kinase Chk2	CHEK2	NaN	NaN	NaN	22.458	22.4362	23.1561	NaN	NaN	NaN	NaN	NaN	NaN	NaN	NaN	NaN	NaN	NaN	21.4189	NaN	NaN	NaN	NaN	NaN	2	1	2	NaN	NaN	NaN	NaN	NaN	NaN	NaN	NaN	NaN	NaN	NaN	1	NaN	NaN
O96019;O96019-2;O94805	O96019;O96019-2	Actin-like protein 6A	ACTL6A	26.0418	26.1968	26.3087	27.048	27.5923	26.7447	26.5066	26.8547	26.18	25.9002	26.1269	26.2704	25.9591	25.9054	26.1578	26.4984	26.5205	26.7011	25.8764	25.8334	10	10	9	10	12	10	11	10	10	3	7	8	7	9	8	9	9	10	7	8
P00156	P00156	Cytochrome b	MT-CYB	24.2526	NaN	23.2499	23.6815	23.1555	22.3789	23.2797	23.7233	22.8995	NaN	NaN	NaN	NaN	23.029	23.1238	23.2063	24.6541	NaN	24.0985	22.7098	2	1	2	2	2	2	2	2	2	NaN	1	1	2	2	2	2	1	1	2	1
P00167-2;P00167;P00167-3	P00167-2;P00167;P00167-3	Cytochrome b5	CYB5A	28.2768	25.3867	25.6363	23.9148	26.3566	26.1381	25.2743	25.8742	24.7969	23.093	26.7772	25.8486	26.7563	27.576	25.693	26.8044	27.4419	27.2687	26.4376	27.2004	6	5	5	2	6	5	4	5	3	1	5	5	4	6	5	6	6	6	4	5
P00325;P00325-2;P08319;P08319-2	P00325;P00325-2	Alcohol dehydrogenase 1B	ADH1B	25.5985	29.4908	NaN	20.355	24.3754	NaN	NaN	NaN	NaN	NaN	22.639	25.8846	27.305	24.1993	21.8954	NaN	NaN	NaN	NaN	25.5708	6	15	NaN	2	1	NaN	NaN	NaN	NaN	NaN	2	9	14	1	1	NaN	NaN	NaN	NaN	6
P00326	P00326	Alcohol dehydrogenase 1C	ADH1C	26.0266	NaN	NaN	NaN	21.6334	NaN	NaN	NaN	NaN	NaN	NaN	NaN	23.6525	22.5566	NaN	NaN	NaN	NaN	NaN	25.3012	6	1	NaN	NaN	1	NaN	NaN	NaN	NaN	NaN	NaN	NaN	4	1	NaN	NaN	NaN	NaN	1	5
P00338;P00338-3;P00338-4;P00338-5;P00338-2	P00338;P00338-3;P00338-4;P00338-5;P00338-2	L-lactate dehydrogenase A chain	LDHA	30.9684	31.3088	32.1474	31.3923	31.1271	30.363	31.9205	32.1766	32.0681	31.1934	31.5028	31.1091	31.4638	31.7211	31.9234	31.3142	31.6181	31.6388	31.6116	31.3017	15	16	16	16	16	16	16	16	16	15	16	16	16	16	16	16	15	16	15	16
P00352	P00352	Retinal dehydrogenase 1	ALDH1A1	29.0582	29.2043	30.303	26.7437	29.6269	30.9965	26.9625	28.605	29.151	27.5938	28.117	29.49	31.9854	29.3	29.8281	27.9383	27.5563	27.3467	29.8284	28.3546	20	23	25	14	24	26	12	20	23	12	21	25	28	21	25	19	12	15	19	20
P00367;P00367-3;P00367-2;P49448	P00367;P00367-3;P00367-2;P49448	Glutamate dehydrogenase 1, mitochondrial;Glutamate dehydrogenase 2, mitochondrial	GLUD1;GLUD2	29.1769	28.849	28.9361	29.7766	29.0374	28.6773	29.5496	28.9007	28.8132	28.4809	28.4263	29.3234	28.7845	28.4743	29.3166	28.3507	29.5372	28.8102	28.8865	28.5634	21	20	22	23	18	18	20	18	21	16	21	22	21	19	21	22	19	21	16	21
P00387-2;P00387;P00387-3	P00387-2;P00387;P00387-3	NADH-cytochrome b5 reductase 3;NADH-cytochrome b5 reductase 3 membrane-bound form;NADH-cytochrome b5 reductase 3 soluble form	CYB5R3	29.1927	29.631	28.5872	27.8461	29.1706	29.1759	29.4081	28.5789	30.0105	28.9774	28.2919	29.0593	29.0402	29.1624	28.9295	28.7489	29.1485	28.6908	29.1561	28.6911	14	15	12	13	13	14	13	12	14	11	12	13	13	12	11	13	13	13	12	12
P00390-2;P00390;P00390-3;P00390-5	P00390-2;P00390;P00390-3;P00390-5	Glutathione reductase, mitochondrial	GSR	30.4487	28.0825	28.9797	28.8108	28.8324	29.7068	28.3193	28.078	29.7878	26.6974	30.2434	29.7267	29.619	30.212	29.3544	29.3396	30.2443	29.573	28.6512	29.8548	19	14	16	18	15	17	16	13	18	8	18	19	17	17	16	16	16	18	14	18
P00395	P00395	Cytochrome c oxidase subunit 1	MT-CO1	26.6619	24.8348	24.5324	NaN	23.6817	NaN	23.0466	NaN	24.0035	24.366	24.6872	24.5832	24.9411	24.2476	25.8522	24.8731	26.2135	24.5194	NaN	NaN	2	1	1	NaN	1	NaN	1	NaN	1	1	1	1	1	1	1	1	1	1	NaN	NaN
P00403	P00403	Cytochrome c oxidase subunit 2	MT-CO2	30.0562	28.6807	28.2537	28.8363	28.0765	27.7992	28.1299	28.8054	27.9241	27.2596	28.6336	28.4643	28.5223	28.5032	29.1425	28.5743	29.9779	28.981	28.0525	28.602	7	6	7	5	6	6	6	6	6	6	7	6	6	6	6	7	6	6	6	7
P00441	P00441	Superoxide dismutase [Cu-Zn]	SOD1	29.9882	29.5225	30.0557	28.6625	29.3961	30.1813	29.102	29.2572	29.5343	28.2399	29.5305	29.7034	29.6519	28.8903	30.366	29.3486	29.7938	29.7609	28.1374	29.3346	7	7	7	6	7	7	6	6	5	4	7	7	7	5	6	5	5	7	4	6
P00450	P00450	Ceruloplasmin	CP	30.6311	29.9035	30.4667	30.4863	30.6901	30.3075	29.9796	30.6694	31.6997	32.1316	29.9851	30.2373	30.7487	32.1245	30.9408	28.5598	31.8262	30.1966	30.8899	30.3665	40	31	39	34	39	34	32	36	44	42	37	32	35	41	40	22	42	33	33	34
P00488	P00488	Coagulation factor XIII A chain	F13A1	27.0144	28.6024	27.764	26.7799	27.9285	28.1006	28.4307	27.5452	28.8704	30.0932	28.7785	29.5071	29.0807	28.8405	28.6548	29.4184	27.9619	28.8481	29.2636	27.8246	14	20	15	11	17	19	20	13	18	19	21	22	21	19	21	21	13	21	23	15
P00491	P00491	Purine nucleoside phosphorylase	PNP	29.9549	27.8635	26.8913	26.7688	28.6414	27.2741	28.7951	28.1205	29.5029	27.7616	27.9516	27.8615	27.8687	27.9789	30.8385	28.4475	29.3907	29.1004	29.3361	28.7975	16	14	10	11	15	10	15	12	14	11	14	14	14	12	16	15	14	15	14	15
P00492	P00492	Hypoxanthine-guanine phosphoribosyltransferase	HPRT1	26.7936	26.7861	27.628	27.4044	27.2291	26.391	27.1582	26.8247	26.3566	26.2461	27.4768	26.3939	27.0701	27.0173	26.2847	27.0418	26.956	27.0882	27.2966	26.8897	10	10	10	10	10	9	10	9	9	8	11	11	11	10	9	10	8	10	9	10
P00505;P00505-2	P00505;P00505-2	Aspartate aminotransferase, mitochondrial	GOT2	30.0701	28.4084	28.9305	30.2182	28.0485	28.7754	28.393	28.5178	28.6212	27.5717	29.7034	28.4584	28.6294	28.5556	28.8009	28.602	29.5904	28.4669	28.3038	27.5685	20	16	19	24	18	19	19	16	21	11	22	17	19	16	20	19	20	17	13	14
P00533;P00533-4;P00533-3;P00533-2	P00533;P00533-4;P00533-3	Epidermal growth factor receptor	EGFR	23.2821	22.5467	22.4423	23.0866	25.2149	22.7042	20.9229	22.2061	23.5857	NaN	20.3223	23.1602	22.2349	22.1115	22.633	22.2288	22.9163	22.5042	19.6203	22.5037	1	2	2	1	4	3	1	1	2	NaN	1	5	2	4	1	2	2	1	2	2
P00558;P07205	P00558	Phosphoglycerate kinase 1	PGK1	32.8882	31.951	32.7329	32.5185	31.8489	31.7449	32.6445	32.4196	31.4584	32.3662	33.1674	31.8734	32.1484	32.5339	31.8738	32.0704	32.2512	32.109	32.0699	32.0192	27	26	27	26	26	26	27	27	25	25	26	26	27	27	27	27	25	26	23	26
P00568;Q9Y6K8-2;Q9Y6K8-3;Q9Y6K8	P00568	Adenylate kinase isoenzyme 1	AK1	27.7561	27.2271	28.4481	26.8049	27.0201	27.4627	26.191	27.0357	27.097	26.2828	29.1317	27.3065	27.1944	27.3978	27.6976	27.293	27.893	26.7264	27.0102	27.4795	9	8	9	9	9	9	8	7	10	4	9	10	8	9	9	9	9	9	8	9
P00734;CON__P00735	P00734	Prothrombin;Activation peptide fragment 1;Activation peptide fragment 2;Thrombin light chain;Thrombin heavy chain	F2	28.8188	28.3118	29.2483	27.9951	29.0658	29.1885	27.918	28.9109	29.2138	30.9092	28.7028	28.978	28.5423	30.2142	28.6479	28.4166	29.6996	28.6607	29.3073	28.8149	26	25	26	19	28	22	20	26	27	31	28	19	24	30	23	23	24	22	18	26
P00736	P00736	Complement C1r subcomponent;Complement C1r subcomponent heavy chain;Complement C1r subcomponent light chain	C1R	24.5993	27.5883	26.3748	26.6903	26.8829	26.4964	26.7468	27.2423	26.7213	29.3731	25.052	26.5888	26.8347	26.8631	27.0621	26.2808	26.694	25.8789	27.602	26.3231	4	17	11	11	15	12	16	14	12	20	5	10	11	13	14	12	11	13	15	11
P00738;P00738-2	P00738;P00738-2	Haptoglobin;Haptoglobin alpha chain;Haptoglobin beta chain	HP	32.5652	31.3677	31.2779	31.4386	29.4493	31.3669	31.9787	32.0055	31.7854	33.2941	31.6947	30.9075	30.1393	33.3662	31.2725	31.9265	31.8022	32.3187	33.0095	32.046	23	27	27	25	21	25	27	27	26	26	25	25	24	27	25	27	26	25	25	25
P00739;P00739-2	P00739;P00739-2	Haptoglobin-related protein	HPR	25.88	24.9339	24.4581	24.169	23.5674	24.5493	23.5291	24.5229	24.54	26.482	24.5553	25.2975	23.5824	26.4902	24.8335	24.6532	25.2808	24.5318	26.0182	25.0164	4	4	4	4	3	2	1	4	4	4	3	4	1	4	3	4	4	3	5	4
P00740;P00740-2	P00740;P00740-2	Coagulation factor IX;Coagulation factor IXa light chain;Coagulation factor IXa heavy chain	F9	25.0001	22.1115	25.5005	22.824	24.6068	24.7967	24.2345	25.7455	22.7431	28.4668	25.2718	23.2723	23.5588	26.1435	21.3264	25.0996	24.2447	25.1884	25.0459	25.3587	6	1	6	3	6	4	4	8	2	10	7	3	5	12	2	7	2	7	4	8
P00742	P00742	Coagulation factor X;Factor X light chain;Factor X heavy chain;Activated factor Xa heavy chain	F10	21.2259	NaN	19.8581	22.3935	23.5857	22.2084	22.5048	20.9617	21.5829	27.6401	23.0375	21.7995	NaN	22.722	24.0131	21.1323	22.3388	20.4878	24.7373	22.3222	3	NaN	1	1	2	2	1	4	2	6	1	1	NaN	6	2	2	2	1	2	1
P00746	P00746	Complement factor D	CFD	NaN	23.6531	20.4714	22.4109	24.439	23.552	23.0748	23.7008	20.6049	27.2131	24.0206	23.5244	23.5129	25.0505	22.2535	NaN	23.9009	NaN	24.2186	22.9639	NaN	3	1	2	4	2	1	2	1	6	3	3	2	4	1	NaN	2	NaN	3	1
P00747;CON__P06868;Q02325;Q15195	P00747	Plasminogen;Plasmin heavy chain A;Activation peptide;Angiostatin;Plasmin heavy chain A, short form;Plasmin light chain B	PLG	29.7127	28.8349	29.7618	28.6816	29.8568	29.7583	28.7429	30.0882	29.651	32.3851	29.3878	29.0617	28.8968	31.2102	28.8443	28.9583	30.2199	29.1295	30.4171	29.3556	35	31	35	30	36	34	26	38	33	36	31	30	30	42	29	31	35	29	34	32
P00748	P00748	Coagulation factor XII;Coagulation factor XIIa heavy chain;Beta-factor XIIa part 1;Coagulation factor XIIa light chain	F12	25.4258	24.2523	26.1427	23.343	25.1203	25.142	NaN	25.2782	25.3961	27.7575	25.9966	23.8306	24.9036	25.8073	25.8041	25.0721	24.1684	25.2515	25.7646	25.927	6	3	9	2	8	4	NaN	9	7	12	9	4	3	6	8	8	4	6	7	8
P00749-2;P00749	P00749-2;P00749	Urokinase-type plasminogen activator;Urokinase-type plasminogen activator long chain A;Urokinase-type plasminogen activator short chain A;Urokinase-type plasminogen activator chain B	PLAU	NaN	21.656	NaN	NaN	NaN	NaN	20.9583	NaN	NaN	NaN	NaN	NaN	NaN	NaN	NaN	NaN	NaN	NaN	NaN	NaN	NaN	1	NaN	NaN	NaN	NaN	1	NaN	NaN	2	NaN	1	NaN	NaN	NaN	NaN	NaN	NaN	NaN	NaN
P00751;P00751-2	P00751	Complement factor B;Complement factor B Ba fragment;Complement factor B Bb fragment	CFB	29.5845	29.7074	29.9161	29.0936	29.722	29.6442	29.6545	29.2297	29.5521	30.2243	29.4688	29.3517	30.1544	30.4367	29.6058	29.6509	30.1915	29.5923	30.1592	30.4235	24	23	26	23	24	22	23	23	22	24	24	22	24	24	20	20	23	21	25	24
P00813	P00813	Adenosine deaminase	ADA	23.348	24.3857	24.75	22.279	24.6587	22.7658	23.5438	23.2317	NaN	23.9113	NaN	22.485	NaN	NaN	NaN	22.8704	23.3051	23.1455	23.6892	21.8783	4	6	8	3	6	1	4	5	NaN	1	NaN	2	NaN	NaN	NaN	3	1	2	4	1
P00846	P00846	ATP synthase subunit a	MT-ATP6	26.4842	24.6861	25.2831	25.7343	24.4886	25.3442	25.4299	25.5499	25.4793	24.2439	25.4322	25.1752	25.3788	25.1885	25.8322	25.6424	26.5284	25.7001	25.5234	25.5716	1	1	1	1	1	1	1	1	1	1	1	1	1	1	1	1	1	1	1	1
P00915	P00915	Carbonic anhydrase 1	CA1	29.1523	28.449	27.219	28.6378	29.428	30.2041	28.7748	29.2539	30.6541	30.751	27.6002	28.8072	27.7923	28.5725	27.1165	28.0881	28.1511	29.099	31.3608	28.9238	13	12	9	13	11	12	12	12	14	14	11	12	12	11	8	10	11	11	13	10
P00918	P00918	Carbonic anhydrase 2	CA2	26.7145	26.1314	25.346	26.3973	27.0876	27.6727	27.2111	27.09	28.8911	28.4333	26.3195	26.5328	26.2243	27.1024	30.0547	26.3343	24.1813	27.8301	29.0628	27.0472	8	11	7	9	9	10	11	9	13	9	8	7	8	10	15	8	4	12	9	9
P00966	P00966	Argininosuccinate synthase	ASS1	29.3933	28.636	30.2166	30.5598	29.4018	27.6782	29.3471	30.0813	26.3524	26.3669	25.2932	25.9101	27.1337	26.8386	28.4591	25.6692	27.5971	27.6425	27.3741	25.6913	19	18	21	20	17	17	18	18	7	5	5	8	14	10	16	6	13	15	12	6
P00973-2;P00973-4;P00973;P00973-3	P00973-2;P00973-4;P00973;P00973-3	2-5-oligoadenylate synthase 1	OAS1	24.3839	NaN	NaN	20.3968	25.3177	NaN	22.7101	26.5614	22.4038	NaN	23.1675	NaN	23.3258	23.4848	NaN	21.3384	NaN	21.2692	21.9181	NaN	4	NaN	NaN	1	7	NaN	2	6	2	NaN	2	NaN	2	3	1	1	NaN	1	1	NaN
P00995	P00995	Pancreatic secretory trypsin inhibitor	SPINK1	24.1746	NaN	NaN	NaN	NaN	NaN	NaN	NaN	NaN	NaN	NaN	NaN	NaN	NaN	NaN	NaN	NaN	NaN	NaN	NaN	2	NaN	NaN	NaN	NaN	NaN	NaN	NaN	NaN	NaN	NaN	NaN	NaN	NaN	NaN	NaN	NaN	NaN	NaN	NaN
P01008	P01008	Antithrombin-III	SERPINC1	29.3961	28.5735	29.4391	28.0883	29.7815	30.8634	27.8991	28.6966	29.4817	30.5356	29.9368	29.6743	30.1489	30.0432	29.533	29.3267	30.1523	30.07	29.7121	29.5966	21	17	17	16	18	21	16	17	16	19	18	20	20	22	17	18	19	22	15	17
P01009;P01009-2;P01009-3	P01009;P01009-2;P01009-3	Alpha-1-antitrypsin;Short peptide from AAT	SERPINA1	32.6154	32.2206	32.872	31.5372	32.7841	32.5764	32.0408	32.0224	32.4326	33.7323	32.1305	32.3536	32.0477	33.7307	32.4059	31.956	33.37	32.8167	33.0266	32.8424	26	25	26	24	28	24	23	21	23	22	23	25	22	26	25	23	26	24	26	21
P01011;P01011-2;P01011-3	P01011	Alpha-1-antichymotrypsin;Alpha-1-antichymotrypsin His-Pro-less	SERPINA3	29.5237	29.1108	29.4637	28.2916	30.2359	29.9424	29.5395	29.6642	29.3401	30.9835	28.8606	29.2269	31.4439	32.336	29.3209	29.1067	30.4345	30.0877	29.8614	31.1394	17	16	14	15	18	17	15	17	14	16	14	16	19	19	15	16	14	18	13	17
P01019	P01019	Angiotensinogen;Angiotensin-1;Angiotensin-2;Angiotensin-3;Angiotensin-4;Angiotensin 1-9;Angiotensin 1-7;Angiotensin 1-5;Angiotensin 1-4	AGT	27.5466	26.9591	27.2602	26.0651	27.7667	27.5971	26.4285	27.2129	27.6035	29.09	27.5211	27.5353	26.8797	28.1867	27.3116	27.0116	28.1957	27.4961	27.8882	27.6359	10	10	9	9	10	10	9	9	9	8	10	10	9	9	10	10	10	10	8	10
P01023	P01023	Alpha-2-macroglobulin	A2M	30.9484	30.4627	29.9217	30.8958	30.3782	30.6181	29.4333	31.2527	31.4374	32.854	29.875	30.9683	30.921	32.1527	31.5443	29.5715	31.1383	30.2811	33.2597	29.8166	55	49	50	54	53	53	37	53	57	61	48	54	55	59	59	48	50	47	63	47
P01024	P01024	Complement C3;Complement C3 beta chain;C3-beta-c;Complement C3 alpha chain;C3a anaphylatoxin;Acylation stimulating protein;Complement C3b alpha chain;Complement C3c alpha chain fragment 1;Complement C3dg fragment;Complement C3g fragment;Complement C3d fragment;Complement C3f fragment;Complement C3c alpha chain fragment 2	C3	32.493	32.1822	32.5356	31.9779	32.359	32.6404	31.7801	32.5594	32.2395	34.0546	33.5978	31.6892	32.7389	33.3814	32.6272	32.9026	33.2877	32.0997	33.4262	33.2684	84	86	87	78	79	86	77	87	80	81	90	78	86	91	81	87	81	77	81	88
P01031;CON__Q1A7A4	P01031	Complement C5;Complement C5 beta chain;Complement C5 alpha chain;C5a anaphylatoxin;Complement C5 alpha chain	C5	28.1257	27.6514	28.2544	27.3791	28.1175	28.1166	27.7533	28.2808	27.7318	30.8961	27.9632	27.4474	26.76	28.9284	27.3204	27.5091	28.2814	27.5131	28.5326	28.0589	36	29	36	23	36	29	26	37	24	47	31	26	19	38	28	28	31	23	24	30
P01033	P01033	Metalloproteinase inhibitor 1	TIMP1	25.3064	25.4072	26.2505	24.8098	26.603	24.0841	25.0199	25.8628	26.7563	27.6646	28.2356	26.8927	26.2336	27.5277	27.8446	25.8421	26.4551	25.5568	25.936	27.2581	4	5	5	4	7	2	4	6	7	7	6	6	4	6	6	5	7	4	5	6
P01034	P01034	Cystatin-C	CST3	26.6931	NaN	25.2851	24.5774	24.1717	21.9529	24.1092	24.5278	25.8061	23.8842	26.8679	24.2721	24.9467	26.0885	25.1503	25.2481	26.5818	23.9056	24.3539	25.9551	5	NaN	3	3	3	1	1	3	4	1	5	3	5	5	5	3	5	3	2	4
P01037;P01036	P01037	Cystatin-SN	CST1	NaN	NaN	NaN	NaN	NaN	NaN	NaN	NaN	NaN	19.4	29.2447	NaN	26.4753	20.6598	21.0042	24.2259	NaN	NaN	NaN	30.738	NaN	NaN	NaN	NaN	NaN	NaN	NaN	NaN	NaN	1	6	NaN	5	1	2	4	NaN	NaN	NaN	6
P01040	P01040	Cystatin-A;Cystatin-A, N-terminally processed	CSTA	NaN	22.4036	NaN	22.2306	23.0851	NaN	NaN	NaN	NaN	23.4331	NaN	22.0912	22.3182	22.87	NaN	22.9296	22.8237	23.2129	22.3128	NaN	NaN	2	NaN	2	2	NaN	NaN	NaN	NaN	1	NaN	2	1	2	NaN	3	1	2	1	NaN
P01042;CON__P01045-1;CON__Q2KJ62;CON__P01044-1	P01042	Kininogen-1;Kininogen-1 heavy chain;T-kinin;Bradykinin;Lysyl-bradykinin;Kininogen-1 light chain;Low molecular weight growth-promoting factor	KNG1	28.3072	28.0541	28.4462	26.9519	28.5834	28.2083	27.1928	28.1609	28.4493	30.3888	28.1344	28.1565	27.8782	29.2211	28.2041	28.2303	29.1739	27.7577	29.0152	28.3524	15	13	15	12	15	15	11	14	15	16	14	13	15	16	14	15	15	14	15	14
P01111	P01111	GTPase NRas	NRAS	22.3703	23.0752	23.0317	27.8541	22.9636	22.815	23.4335	23.2794	22.9055	NaN	NaN	22.4936	22.6471	22.9186	22.7569	23.1339	22.4983	23.1852	22.8859	22.7464	2	2	2	4	3	2	2	2	2	1	NaN	4	1	1	1	2	1	2	1	2
P01116	P01116	GTPase KRas;GTPase KRas, N-terminally processed	KRAS	NaN	NaN	NaN	NaN	NaN	NaN	NaN	24.3404	NaN	NaN	NaN	NaN	NaN	NaN	NaN	NaN	21.0722	NaN	NaN	NaN	NaN	NaN	NaN	NaN	NaN	NaN	NaN	1	NaN	NaN	NaN	NaN	NaN	NaN	NaN	NaN	1	NaN	NaN	NaN
P01116-2	P01116-2	GTPase KRas;GTPase KRas, N-terminally processed	KRAS	25.9916	25.8969	26.3105	28.1646	25.7491	25.5182	25.783	29.6685	25.4696	25.5931	26.0636	25.7713	25.9503	25.8466	25.6249	25.7928	26.8055	26.1319	26.3489	25.8041	9	9	8	9	8	7	8	11	6	2	8	9	8	8	8	8	6	7	6	7
P01137	P01137	Transforming growth factor beta-1;Latency-associated peptide	TGFB1	NaN	NaN	NaN	NaN	NaN	NaN	NaN	NaN	NaN	NaN	NaN	NaN	NaN	NaN	NaN	NaN	NaN	NaN	NaN	NaN	NaN	NaN	NaN	NaN	NaN	NaN	1	NaN	NaN	NaN	NaN	NaN	NaN	NaN	NaN	NaN	NaN	NaN	NaN	NaN
P01344;P01344-2;P01344-3	P01344;P01344-2;P01344-3	Insulin-like growth factor II;Insulin-like growth factor II;Insulin-like growth factor II Ala-25 Del;Preptin	IGF2	NaN	23.68	24.0964	NaN	22.2878	22.4285	NaN	24.8895	22.3209	24.4893	NaN	NaN	NaN	23.0378	21.8431	NaN	NaN	NaN	NaN	NaN	NaN	2	3	NaN	1	1	NaN	3	1	1	NaN	NaN	NaN	1	1	NaN	NaN	NaN	NaN	NaN
P01591	P01591	Immunoglobulin J chain	IGJ	26.2638	26.8527	24.9352	25.5366	26.44	25.2171	26.0463	26.9325	26.8576	27.7987	25.0531	26.2733	27.6283	26.3402	25.0524	24.7983	28.8137	25.7694	27.3583	26.5215	5	6	4	6	6	3	6	6	5	5	3	5	6	4	3	4	5	5	6	6
P01594;P01593	P01594;P01593	Ig kappa chain V-I region AU;Ig kappa chain V-I region AG		22.766	25.4275	23.0311	24.1379	22.8684	23.0946	22.2132	24.1245	23.0599	25.2594	23.5406	23.0293	24.2497	23.268	23.1687	22.4029	24.1806	22.5783	24.3792	23.5054	1	1	1	1	1	1	1	1	1	1	1	1	1	1	1	1	1	1	1	1
P04432;P01597	P04432;P01597	Ig kappa chain V-I region Daudi;Ig kappa chain V-I region DEE		23.2846	26.9964	23.5403	22.8135	22.9691	23.7437	25.7134	24.0595	23.4736	24.4954	23.7524	23.0416	25.1118	24.367	22.496	23.2539	23.7695	22.4262	27.9221	23.7075	2	3	2	2	1	1	2	2	2	2	2	1	2	2	2	2	2	1	3	2
P01602	P01602	Ig kappa chain V-I region HK102	IGKV1-5	24.868	29.01	25.9039	25.4896	25.3524	25.2199	27.5189	26.1506	25.3862	28.7828	25.9209	25.9166	26.7323	26.0579	25.3487	25.0439	26.537	24.1221	26.3428	26.1295	2	2	2	2	2	1	2	2	2	2	2	2	2	2	2	2	2	2	2	1
P01619	P01619	Ig kappa chain V-III region B6		26.4689	29.0949	27.6024	26.1106	27.4183	25.1402	29.4616	27.3098	27.2924	29.1312	27.3644	26.87	28.2585	27.9415	26.7565	27.4137	27.7614	25.9542	29.0629	27.5806	3	3	3	2	3	2	3	2	2	3	2	2	3	2	2	2	2	2	1	3
P01624;A0A0C4DH55	P01624	Ig kappa chain V-III region POM		25.8592	27.5306	26.8453	26.2998	26.4185	26.4387	29.3791	26.3297	23.0965	29.0363	26.7053	26.5389	27.1625	27.5217	25.9496	26.116	27.2279	25.4649	29.4434	26.407	2	2	2	2	1	2	3	2	2	2	2	2	2	2	2	1	2	1	2	2
P01699	P01699	Ig lambda chain V-I region VOR		21.426	23.2595	NaN	NaN	NaN	NaN	23.627	NaN	NaN	NaN	NaN	22.7736	NaN	21.7387	NaN	NaN	NaN	NaN	NaN	NaN	1	1	NaN	NaN	NaN	NaN	1	NaN	NaN	NaN	NaN	1	NaN	1	NaN	NaN	NaN	NaN	NaN	NaN
P01700	P01700	Ig lambda chain V-I region HA		25.2331	27.2821	24.6339	24.1003	25.8476	24.8297	25.479	25.1683	25.2835	26.4499	25.7555	24.7894	25.8202	25.6019	24.859	25.1728	25.457	24.5199	27.5089	23.9066	2	2	2	2	2	2	2	2	2	1	1	2	3	3	2	1	2	1	3	1
P01701	P01701	Ig lambda chain V-I region NEW		23.2086	23.8904	24.7568	23.8591	23.7496	24.34	24.3685	24.4264	24.3218	23.5199	23.341	23.8322	24.8755	23.4628	NaN	23.7136	23.7843	NaN	26.5593	23.4361	1	2	1	2	1	1	1	2	1	1	1	1	2	1	NaN	1	1	NaN	1	1
P01703	P01703	Ig lambda chain V-I region NEWM		22.5835	25.52	22.6072	22.2674	24.119	22.5398	NaN	22.3546	22.9153	23.1113	23.7189	NaN	NaN	23.2902	NaN	22.5828	23.2731	NaN	25.0255	NaN	2	2	1	1	1	1	NaN	2	1	1	1	NaN	NaN	2	NaN	1	1	NaN	1	NaN
P01709	P01709	Ig lambda chain V-II region MGC		20.5234	22.7913	21.8411	24.3746	24.2313	20.9485	26.7814	22.4572	21.9339	23.047	22.2901	21.0839	23.1175	23.4094	21.4706	21.4716	21.3085	NaN	27.5439	22.366	2	1	1	2	2	2	2	2	1	1	2	2	1	2	2	1	1	NaN	2	1
P01714	P01714	Ig lambda chain V-III region SH		23.0945	28.6963	22.7566	24.1331	NaN	NaN	24.0938	22.5238	23.4605	25.715	21.7816	NaN	23.1636	22.2764	22.1071	NaN	22.836	21.8658	26.4255	22.6431	1	3	2	3	NaN	NaN	2	1	2	1	1	NaN	1	1	2	NaN	1	1	2	1
P01715	P01715	Ig lambda chain V-IV region Bau		NaN	24.167	NaN	NaN	NaN	22.9445	23.7526	23.047	NaN	24.1338	23.0312	NaN	23.4551	NaN	NaN	NaN	22.9626	NaN	24.44	NaN	NaN	2	NaN	NaN	NaN	1	2	2	NaN	1	1	NaN	1	NaN	NaN	NaN	1	NaN	2	NaN
P01717	P01717	Ig lambda chain V-IV region Hil		23.8043	27.3598	24.4359	23.8171	23.8014	23.1994	26.0538	24.191	24.2402	26.1706	24.287	24.6416	25.5537	24.5356	22.6437	22.4484	24.8479	22.3603	26.1165	24.1541	1	2	1	1	1	1	2	1	1	1	1	1	1	2	1	1	2	1	2	1
P01721	P01721	Ig lambda chain V-VI region AR		23.1711	25.4615	23.4444	23.3527	22.2842	22.8943	27.1986	23.632	22.44	24.8086	22.5225	23.4133	23.1954	NaN	22.9598	23.1505	23.5992	NaN	24.7881	22.7242	2	2	1	1	1	1	2	2	1	1	1	1	2	NaN	1	1	1	NaN	1	1
P01742	P01742	Ig heavy chain V-I region EU		NaN	NaN	23.6856	NaN	22.9136	NaN	NaN	NaN	NaN	NaN	NaN	NaN	23.2167	NaN	NaN	NaN	NaN	NaN	21.8334	NaN	NaN	NaN	1	NaN	1	NaN	NaN	NaN	NaN	NaN	NaN	NaN	1	NaN	NaN	NaN	NaN	NaN	1	NaN
P01743	P01743	Ig heavy chain V-I region HG3		NaN	24.3499	22.6042	NaN	22.4727	NaN	NaN	NaN	NaN	NaN	NaN	NaN	23.0253	21.7388	NaN	21.5745	NaN	NaN	NaN	22.2549	NaN	1	1	NaN	1	NaN	NaN	NaN	NaN	1	1	NaN	1	1	NaN	1	NaN	NaN	NaN	1
P01764	P01764	Ig heavy chain V-III region 23	IGHV3-23	NaN	21.0244	NaN	NaN	NaN	NaN	NaN	21.8709	NaN	NaN	NaN	NaN	NaN	NaN	NaN	NaN	NaN	NaN	NaN	NaN	NaN	1	NaN	NaN	NaN	NaN	1	1	NaN	NaN	NaN	NaN	NaN	NaN	NaN	NaN	NaN	NaN	NaN	NaN
P01766	P01766	Ig heavy chain V-III region BRO		NaN	21.3406	NaN	NaN	20.7276	22.1365	26.1554	21.2495	22.4054	22.9975	22.1058	NaN	23.5068	NaN	NaN	21.4684	23.0821	NaN	NaN	NaN	NaN	1	NaN	NaN	1	1	1	1	1	1	1	NaN	1	NaN	NaN	1	1	NaN	NaN	NaN
P0DP03;P01768	P0DP03;P01768	Ig heavy chain V-III region CAM		25.3793	28.2484	26.9674	25.4851	26.5518	26.4024	28.2302	26.0078	26.9336	27.1463	25.8298	25.6635	27.1123	27.1364	25.3628	26.5505	26.6439	25.4717	27.2918	26.673	3	5	3	3	2	2	4	4	2	3	3	2	4	3	2	4	2	2	3	3
P01780	P01780	Ig heavy chain V-III region JON		25.0496	25.6621	26.6796	26.104	26.0753	25.491	26.4097	26.0011	26.2339	27.3836	26.5882	25.7864	26.6476	26.1921	25.3352	25.6448	26.421	24.7801	27.5369	26.1408	2	2	1	2	1	1	2	2	2	2	1	1	1	1	1	1	2	1	2	1
P0DP04;P01782	P0DP04;P01782	Ig heavy chain V-III region DOB		23.1992	24.0367	24.362	23.7333	23.5074	24.4944	26.7601	23.0401	24.4276	25.7588	25.1712	24.6749	25.3114	24.0908	22.7744	23.3187	24.8753	23.1407	27.2122	25.2762	1	2	2	2	1	2	2	1	2	2	2	2	2	1	1	1	2	2	2	2
P01817	P01817	Ig heavy chain V-II region MCE		NaN	26.0389	NaN	NaN	NaN	NaN	22.4475	NaN	NaN	NaN	NaN	NaN	22.243	NaN	NaN	NaN	NaN	NaN	NaN	23.038	NaN	1	NaN	NaN	NaN	NaN	1	NaN	NaN	NaN	NaN	NaN	1	NaN	NaN	NaN	NaN	NaN	NaN	1
P01833	P01833	Polymeric immunoglobulin receptor;Secretory component	PIGR	32.9156	18.7022	NaN	22.7965	24.6975	NaN	23.9318	28.2296	28.5977	NaN	NaN	29.7782	33.1981	33.6568	29.1132	31.1643	31.476	26.3919	24.8284	33.8134	32	1	NaN	5	8	NaN	8	24	20	NaN	NaN	25	31	35	24	30	24	15	5	32
P01834	P01834	Ig kappa chain C region	IGKC	31.304	33.0236	32.0181	30.9891	31.5207	31.8827	32.5737	31.962	32.1427	33.8679	32.5186	31.6342	32.7547	32.4549	31.6424	31.433	32.4024	30.9965	33.1414	32.1835	6	7	6	6	6	6	6	6	6	6	6	6	6	6	6	6	6	6	6	6
P01857	P01857	Ig gamma-1 chain C region	IGHG1	33.0171	34.2845	33.3266	32.6153	33.1855	33.4636	34.0882	33.1387	33.5017	35.235	33.826	33.2328	33.7662	33.6116	32.7057	33.0445	33.9762	32.2471	34.5985	33.3347	16	17	15	15	17	15	18	15	16	18	17	18	16	17	19	15	17	14	15	16
P01859	P01859	Ig gamma-2 chain C region	IGHG2	30.9436	30.1159	31.4112	28.994	30.4803	30.9654	29.0038	30.8535	32.0195	32.8344	31.1575	30.9995	31.0894	31.918	31.1107	31.182	31.3617	30.3069	32.534	31.4651	7	7	7	6	7	6	7	6	6	8	7	6	7	8	7	6	6	7	7	6
P01860	P01860	Ig gamma-3 chain C region	IGHG3	27.6766	29.4677	29.7496	26.9102	29.6134	30.713	27.6486	29.3209	30.515	31.3622	30.226	29.0914	29.9724	30.7948	29.0402	29.8581	30.1683	27.9902	31.6482	29.2748	6	9	9	6	9	10	6	9	10	9	9	8	9	9	9	9	7	4	10	8
P01861	P01861	Ig gamma-4 chain C region	IGHG4	26.7028	26.4314	28.8519	NaN	26.6214	27.3481	27.4741	28.6723	26.8078	29.8801	28.8235	24.7207	27.5617	28.598	27.8664	25.9569	27.5768	28.4389	30.3328	26.6547	6	3	5	NaN	4	4	5	4	4	5	5	3	5	5	4	3	2	4	6	6
P01871;P01871-2;P04220	P01871;P01871-2;P04220	Ig mu chain C region;Ig mu heavy chain disease protein	IGHM	28.5359	31.5062	28.0531	29.4041	29.043	27.0885	28.4126	29.6212	29.0861	31.8975	26.7221	29.1576	29.9385	29.3765	28.6394	27.5432	27.7465	27.7471	31.2177	27.5141	17	19	17	19	15	14	15	17	16	18	10	16	16	16	15	14	12	13	18	15
P01876	P01876	Ig alpha-1 chain C region	IGHA1	30.9836	30.718	31.1466	28.6501	31.5677	31.2313	31.3116	32.0082	32.0692	33.9568	31.4367	30.3066	32.3238	32.0133	30.4382	30.465	32.446	31.0396	32.4085	31.5186	15	14	12	12	16	13	14	15	14	17	14	12	14	13	13	13	14	13	16	13
P01877	P01877	Ig alpha-2 chain C region	IGHA2	25.7539	24.341	23.7244	23.8223	24.5254	24.5277	25.369	25.4379	29.2276	26.2969	23.7514	23.4056	26.0833	25.9236	23.9019	24.0646	25.7541	24.1859	25.6306	24.5845	2	2	1	4	1	1	5	2	3	2	1	1	2	3	1	1	2	1	3	1
P01880;P01880-2	P01880;P01880-2	Ig delta chain C region	IGHD	NaN	NaN	22.3213	NaN	24.27	21.7326	NaN	NaN	NaN	28.1033	23.23	NaN	26.5102	23.921	NaN	23.6417	24.8426	24.4722	24.1642	NaN	NaN	NaN	1	NaN	4	1	NaN	NaN	NaN	6	3	NaN	6	3	NaN	4	3	3	1	NaN
P01891	P01891	HLA class I histocompatibility antigen, A-68 alpha chain	HLA-A	NaN	NaN	NaN	NaN	NaN	NaN	NaN	NaN	NaN	NaN	NaN	26.1268	NaN	NaN	NaN	NaN	NaN	25.3253	NaN	NaN	NaN	NaN	NaN	NaN	NaN	NaN	NaN	NaN	NaN	NaN	NaN	1	NaN	NaN	NaN	NaN	NaN	2	NaN	NaN
P01892	P01892	HLA class I histocompatibility antigen, A-2 alpha chain	HLA-A	28.2437	29.0168	28.0291	30.662	29.0878	27.2155	29.1997	29.8533	28.3862	29.144	27.5725	28.558	29.5604	27.4116	28.6756	30.1072	28.1603	27.8251	29.6039	28.1383	14	8	10	21	17	7	8	14	6	11	7	11	9	8	9	20	12	15	13	13
P01903	P01903	HLA class II histocompatibility antigen, DR alpha chain	HLA-DRA	29.5399	28.5949	27.8596	28.5726	26.5122	25.5713	29.2649	27.9468	27.0444	27.1019	26.7778	27.6492	29.5739	27.5333	29.4792	28.8517	26.2872	25.8741	28.6575	27.2539	7	7	7	7	7	7	6	6	6	7	6	7	7	7	7	7	6	7	7	7
P01906	P01906	HLA class II histocompatibility antigen, DQ alpha 2 chain	HLA-DQA2	24.5684	23.4946	NaN	21.9491	NaN	NaN	23.3952	NaN	NaN	23.4707	NaN	23.0924	24.707	NaN	22.1271	NaN	NaN	NaN	23.7663	NaN	1	1	NaN	1	NaN	NaN	1	NaN	NaN	1	NaN	1	1	NaN	1	NaN	NaN	NaN	1	NaN
P01909	P01909	HLA class II histocompatibility antigen, DQ alpha 1 chain	HLA-DQA1	23.1794	24.1972	NaN	22.52	NaN	NaN	23.9857	23.3138	NaN	NaN	NaN	NaN	25.116	NaN	NaN	24.4203	NaN	NaN	23.6611	NaN	1	3	NaN	1	NaN	NaN	1	3	NaN	NaN	NaN	NaN	2	NaN	NaN	1	NaN	NaN	1	NaN
P01911	P01911	HLA class II histocompatibility antigen, DRB1-15 beta chain	HLA-DRB1	26.1755	26.0793	26.5384	25.5033	24.2046	20.9843	26.1208	26.6808	24.857	24.9852	23.3753	24.9384	27.393	25.8571	28.2586	25.3154	24.7946	23.9409	26.9292	24.7812	1	2	2	2	1	1	2	1	1	3	1	2	1	2	2	1	2	1	1	2
Q5Y7A7;P01912	Q5Y7A7;P01912	HLA class II histocompatibility antigen, DRB1-13 beta chain;HLA class II histocompatibility antigen, DRB1-3 chain	HLA-DRB1	NaN	NaN	20.1061	NaN	NaN	NaN	NaN	NaN	NaN	NaN	NaN	19.7947	NaN	19.9777	26.1675	NaN	NaN	NaN	NaN	19.9489	NaN	NaN	1	NaN	NaN	NaN	NaN	NaN	NaN	NaN	NaN	1	NaN	1	1	NaN	NaN	NaN	NaN	1
P01920;P05538-2;P05538	P01920	HLA class II histocompatibility antigen, DQ beta 1 chain	HLA-DQB1	26.7248	26.3686	22.9648	NaN	NaN	NaN	26.4263	24.7453	NaN	24.6418	22.9453	24.8479	27.9764	22.6667	23.9701	26.4225	NaN	NaN	25.6211	23.542	7	9	2	NaN	NaN	NaN	7	5	NaN	2	1	4	9	1	3	9	NaN	NaN	4	2
P02008	P02008	Hemoglobin subunit zeta	HBZ	NaN	NaN	NaN	NaN	NaN	NaN	NaN	NaN	NaN	NaN	NaN	NaN	NaN	NaN	NaN	NaN	NaN	NaN	22.7236	NaN	NaN	NaN	NaN	NaN	NaN	NaN	NaN	NaN	NaN	NaN	NaN	NaN	NaN	NaN	NaN	NaN	NaN	NaN	1	1
P02042	P02042	Hemoglobin subunit delta	HBD	29.2499	28.3813	26.6179	28.992	29.7099	30.5016	28.792	28.9634	30.7304	30.7156	27.6395	28.602	27.6037	29.192	27.6723	27.8952	28.5229	29.0503	31.86	29.1347	5	7	4	6	6	6	5	5	7	6	5	5	4	7	4	5	5	5	7	5
P02144	P02144	Myoglobin	MB	23.3044	NaN	NaN	23.8515	NaN	NaN	NaN	NaN	NaN	NaN	23.9387	NaN	NaN	23.2282	NaN	NaN	NaN	23.495	NaN	NaN	3	NaN	NaN	3	NaN	NaN	NaN	NaN	NaN	NaN	3	NaN	NaN	1	NaN	NaN	NaN	2	NaN	NaN
P02452;CON__Q862S4	P02452	Collagen alpha-1(I) chain	COL1A1	29.033	31.6226	31.2658	28.6524	31.3601	32.5384	30.6871	30.1586	30.5583	32.3533	30.9163	31.7745	31.9215	30.2194	32.1287	30.5894	30.2723	30.1247	31.1234	30.9399	15	25	26	14	25	24	21	22	18	26	22	22	22	15	25	22	18	20	22	27
P02458;P02458-1	P02458;P02458-1	Collagen alpha-1(II) chain;Collagen alpha-1(II) chain;Chondrocalcin	COL2A1	NaN	29.8997	28.5915	26.81	29.341	30.7836	28.64	28.5846	28.665	31.3564	29.6284	30.196	30.0803	28.5532	30.3227	29.0451	29.5766	29.3382	30.0531	29.4816	NaN	1	1	1	2	3	1	1	1	1	1	1	1	1	1	3	3	4	1	1
P02461;P02461-2;CON__P04258	P02461;P02461-2	Collagen alpha-1(III) chain	COL3A1	25.5737	29.2545	27.2728	25.0511	27.2366	27.7129	28.9665	27.4305	26.9697	28.6411	26.8717	27.4385	27.7145	27.275	27.3704	27.0828	26.9017	26.7314	27.2968	27.2083	7	12	11	3	11	13	11	12	5	10	8	9	6	9	9	9	8	11	7	11
P02462-2;P02462;P29400;P29400-2	P02462-2;P02462	Collagen alpha-1(IV) chain;Arresten	COL4A1	25.0669	26.3636	25.3439	26.555	28.1667	26.1941	26.4148	24.5129	28.7628	28.4513	27.1969	28.0101	27.2386	27.5678	27.5899	26.986	26.3879	27.0719	28.1716	27.2918	3	4	4	6	8	4	3	3	6	3	5	6	5	4	5	4	2	6	4	6
P02511	P02511	Alpha-crystallin B chain	CRYAB	21.827	26.5888	24.4834	24.2904	25.1499	24.0792	25.7471	23.634	30.8948	24.8661	24.6285	23.6267	24.058	NaN	24.0495	21.0373	NaN	23.8683	19.8057	23.6725	2	7	5	5	6	3	5	3	11	2	5	2	1	NaN	2	1	NaN	4	2	4
P02545;P02545-6;P02545-5;P02545-4	P02545;P02545-6;P02545-5;P02545-4	Prelamin-A/C;Lamin-A/C	LMNA	32.0242	32.3621	31.9857	32.1275	32.3711	32.1393	32.7581	31.7867	32.0657	31.493	32.3038	32.2831	31.9573	31.2092	32.3472	31.3321	32.1728	31.0636	32.0161	31.5702	42	40	42	43	43	42	40	39	40	35	41	42	42	35	41	38	40	38	35	39
P02545-2	P02545-2	Prelamin-A/C;Lamin-A/C	LMNA	25.4192	26.2918	25.8414	25.2339	27.0062	25.6947	26.9893	26.2194	26.4236	26.315	25.4005	25.8619	24.214	25.6268	25.9002	25.6533	26.2755	25.5308	26.3903	26.1228	1	1	1	1	1	1	1	1	1	1	1	1	1	1	1	1	1	1	1	1
P02545-3	P02545-3	Prelamin-A/C;Lamin-A/C	LMNA	NaN	NaN	NaN	22.4392	22.3783	23.0283	NaN	NaN	NaN	NaN	NaN	NaN	NaN	NaN	NaN	NaN	NaN	NaN	NaN	NaN	NaN	NaN	NaN	1	1	1	NaN	NaN	NaN	NaN	NaN	NaN	NaN	NaN	NaN	NaN	NaN	NaN	NaN	NaN
P02549-2;P02549	P02549-2;P02549	Spectrin alpha chain, erythrocytic 1	SPTA1	22.1403	21.6472	NaN	22.466	24.6253	25.8762	24.1029	22.7418	26.0625	26.3494	NaN	20.4201	NaN	23.8097	NaN	NaN	24.8815	21.7494	28.02	22.6858	1	2	NaN	5	8	20	3	3	17	13	NaN	1	NaN	7	NaN	NaN	1	3	28	4
P02647;CON__P15497	P02647	Apolipoprotein A-I;Proapolipoprotein A-I;Truncated apolipoprotein A-I	APOA1	32.2743	31.5478	32.4556	31.2468	31.9221	32.0004	30.4896	31.7748	31.9115	33.8166	31.6166	31.507	31.5025	32.5118	31.404	31.4359	32.6371	31.3086	32.6323	31.1512	20	21	22	21	21	21	21	21	20	21	20	20	20	21	20	21	19	20	20	21
P02649;CON__Q03247	P02649	Apolipoprotein E	APOE	27.7655	28.0941	28.3058	27.7302	29.4202	27.1118	27.7513	29.0677	27.9383	32.154	27.2874	28.3366	28.0744	29.171	27.714	27.3832	27.3012	27.1643	29.3293	26.4819	14	14	13	13	17	11	11	16	14	17	12	14	12	14	14	12	9	12	12	9
P02652	P02652	Apolipoprotein A-II;Proapolipoprotein A-II;Truncated apolipoprotein A-II	APOA2	28.8678	28.1255	29.3992	27.282	28.6238	28.4558	26.7021	28.3604	27.2676	30.422	28.2182	28.0142	28.023	28.9729	27.3143	28.1372	23.0274	27.4593	29.6867	27.1123	4	4	4	4	4	4	4	4	3	4	4	4	4	4	3	4	3	4	4	3
P02654	P02654	Apolipoprotein C-I;Truncated apolipoprotein C-I	APOC1	27.0793	26.3865	27.6596	26.5425	26.613	26.162	25.4527	26.7853	26.4066	29.3936	25.9566	26.6443	25.987	27.2822	25.97	25.8574	27.7035	26.12	27.3076	25.7815	3	3	3	3	3	3	3	3	3	3	3	3	3	3	3	3	3	3	2	3
P02655	P02655	Apolipoprotein C-II;Proapolipoprotein C-II	APOC2	24.1623	23.3261	23.7908	20.9216	23.4564	24.0245	22.7946	22.7243	22.2016	25.5353	22.6905	22.871	NaN	23.1341	22.657	NaN	24.0288	23.2966	24.1925	23.3872	2	1	3	2	2	1	2	2	1	1	1	2	NaN	1	2	NaN	2	2	1	2
P02656	P02656	Apolipoprotein C-III	APOC3	26.1241	25.5274	26.5486	26.0772	25.1789	25.6074	23.922	25.2541	24.8279	27.2918	24.7573	24.9028	24.5847	25.5313	24.8946	24.7817	26.3053	24.9729	25.3825	25.1397	3	3	3	3	3	3	3	3	2	4	3	3	3	3	2	3	3	3	3	3
P02671;P02671-2;CON__P02672	P02671;P02671-2	Fibrinogen alpha chain;Fibrinopeptide A;Fibrinogen alpha chain	FGA	31.9218	31.1455	30.8954	30.9771	31.2625	32.2215	31.5206	32.086	32.1612	34.7837	30.7439	30.4962	29.6879	33.1495	30.9864	30.9524	32.6789	31.5517	33.7154	31.3803	32	30	29	28	32	33	33	32	33	44	29	27	25	43	30	27	35	30	33	30
P02675	P02675	Fibrinogen beta chain;Fibrinopeptide B;Fibrinogen beta chain	FGB	32.0138	31.332	31.2506	31.0201	31.7993	32.4958	32.0819	32.829	32.4376	36.1321	31.2955	31.205	30.371	34.0106	31.7629	31.1094	33.0595	31.5992	33.9538	31.6881	32	32	31	31	30	32	30	34	32	36	33	32	28	35	32	33	31	31	34	32
P02679-2;P02679	P02679-2;P02679	Fibrinogen gamma chain	FGG	31.8744	31.33	31.2292	31.137	31.5805	32.3841	32.0305	32.7191	32.354	35.7788	31.2977	31.1328	30.297	33.8279	31.7565	31.0577	32.7658	31.5951	33.674	31.588	26	25	25	24	26	26	27	25	27	29	26	26	24	29	26	25	25	25	26	25
P02686-2;P02686	P02686-2;P02686	Myelin basic protein	MBP	NaN	22.0601	NaN	NaN	NaN	NaN	NaN	22.358	NaN	NaN	NaN	NaN	NaN	NaN	NaN	NaN	23.5271	NaN	NaN	NaN	NaN	1	NaN	NaN	NaN	NaN	NaN	1	NaN	NaN	NaN	NaN	NaN	NaN	NaN	NaN	1	NaN	NaN	NaN
P02724-3;P02724-2;P02724	P02724-3;P02724-2;P02724	Glycophorin-A	GYPA	NaN	NaN	NaN	NaN	22.6522	22.6555	NaN	NaN	22.4891	NaN	NaN	NaN	NaN	22.712	NaN	NaN	NaN	NaN	23.9249	NaN	NaN	NaN	NaN	NaN	1	1	NaN	NaN	1	NaN	NaN	NaN	NaN	1	NaN	NaN	NaN	NaN	1	NaN
P02730;P02730-2	P02730;P02730-2	Band 3 anion transport protein	SLC4A1	26.5747	25.6577	23.1033	26.2052	27.3301	27.7885	26.05	26.4554	28.0796	28.6721	25.0448	25.9951	23.5185	27.4049	25.4053	25.171	26.1832	27.0601	29.4819	26.4211	13	9	3	11	15	19	10	11	19	14	5	9	3	17	5	5	6	15	21	15
P02741;P02741-2	P02741;P02741-2	C-reactive protein;C-reactive protein(1-205)	CRP	23.1857	NaN	23.8632	21.7992	22.9933	22.4215	22.6479	NaN	21.9748	NaN	23.7075	NaN	NaN	26.6334	NaN	22.9168	24.2702	25.1536	NaN	23.9862	1	NaN	1	1	2	2	2	NaN	1	NaN	2	NaN	NaN	3	NaN	1	3	2	NaN	2
P02743	P02743	Serum amyloid P-component;Serum amyloid P-component(1-203)	APCS	26.3435	27.6998	27.4209	27.0856	26.619	27.4804	27.4966	27.0422	26.8671	29.4127	27.1345	27.2955	26.8276	28.0132	26.453	27.131	26.9047	27.7308	27.5168	27.5533	6	6	5	6	6	5	6	6	6	6	4	6	5	5	5	5	6	6	5	5
P02745	P02745	Complement C1q subcomponent subunit A	C1QA	27.4297	28.4857	27.5922	28.2493	28.2101	29.1034	28.1521	29.8926	27.7874	31.6147	26.9459	28.932	28.4234	29.4391	27.5517	28.0322	28.0215	27.5847	29.9176	28.1303	3	5	3	3	4	1	3	4	3	5	3	4	3	4	2	3	2	3	4	3
P02746	P02746	Complement C1q subcomponent subunit B	C1QB	24.4779	26.6431	25.2133	25.9073	26.5759	25.6749	26.0959	27.3626	26.322	29.5426	24.1846	26.5839	26.4188	26.8772	25.8061	25.9564	24.9621	25.2376	27.5435	25.8106	3	5	3	4	6	3	5	7	7	7	2	5	3	5	5	3	2	3	6	4
P02747	P02747	Complement C1q subcomponent subunit C	C1QC	24.9971	26.6461	25.6363	26.3205	27.0666	25.5459	26.4361	27.7919	26.3086	29.5994	24.6412	26.6879	26.245	27.0445	26.2602	26.1401	25.502	25.7127	27.6136	26.131	3	4	4	4	4	3	4	4	3	4	4	4	4	4	4	4	4	4	4	4
P02748;CON__Q3MHN2	P02748	Complement component C9;Complement component C9a;Complement component C9b	C9	28.5353	28.4884	29.0808	27.9983	29.2458	28.7356	28.7481	28.8316	27.9268	30.787	28.3785	27.4898	27.507	30.066	28.5434	27.7752	28.9296	28.4019	28.6651	28.4263	15	17	18	14	15	16	17	16	14	17	15	11	12	16	15	12	12	15	12	15
P02749;CON__P17690	P02749	Beta-2-glycoprotein 1	APOH	29.1954	29.028	29.5234	28.5074	29.7023	29.7812	28.6949	29.2382	29.6629	31.3644	28.7648	29.3356	29.2284	30.4845	29.6865	29.0045	30.481	29.1615	29.605	29.9273	12	11	12	11	12	12	11	12	11	12	11	12	12	15	12	11	10	11	11	13
P02750	P02750	Leucine-rich alpha-2-glycoprotein	LRG1	28.073	26.5111	27.2486	25.2378	27.029	26.2766	26.7871	26.0358	26.9431	27.7402	26.4036	26.1049	26.5865	28.6571	26.8651	25.8124	28.1802	27.3738	26.8741	27.9911	10	10	11	6	9	7	10	9	7	10	11	8	7	11	11	7	10	11	8	11
P02751;P02751-8;P02751-3;P02751-14;P02751-17;P02751-9;P02751-6;P02751-12;P02751-4;P02751-16;P02751-2	P02751;P02751-8;P02751-3;P02751-14;P02751-17;P02751-9;P02751-6;P02751-12;P02751-4	Fibronectin;Anastellin;Ugl-Y1;Ugl-Y2;Ugl-Y3	FN1	29.9387	33.9506	31.4828	31.3345	32.1701	31.1099	34.2173	33.1012	31.4073	36.2325	31.2534	32.4836	30.8356	31.6409	30.9523	31.4909	30.4404	31.0063	32.9357	32.2764	62	93	77	78	83	72	99	86	74	100	75	83	66	75	67	76	52	64	78	81
P02751-5	P02751-5	Fibronectin;Anastellin;Ugl-Y1;Ugl-Y2;Ugl-Y3	FN1	NaN	NaN	NaN	NaN	23.9833	NaN	26.5432	23.3915	22.5686	29.009	22.6567	24.4812	22.1519	NaN	22.7752	23.1322	NaN	21.6796	24.6519	23.3209	NaN	NaN	NaN	NaN	1	NaN	1	1	1	2	1	1	1	NaN	1	1	NaN	1	1	1
P02753	P02753	Retinol-binding protein 4;Plasma retinol-binding protein(1-182);Plasma retinol-binding protein(1-181);Plasma retinol-binding protein(1-179);Plasma retinol-binding protein(1-176)	RBP4	26.58	25.6683	25.7168	25.7283	26.3848	26.3511	24.0001	26.1926	26.2622	28.5149	26.3353	26.605	26.1839	27.0992	26.3561	25.9107	27.0295	25.3475	26.8551	26.1691	6	4	6	6	5	6	4	6	6	8	6	6	4	7	6	6	6	5	6	6
P02760;CON__P00978	P02760	Protein AMBP;Alpha-1-microglobulin;Inter-alpha-trypsin inhibitor light chain;Trypstatin	AMBP	27.5144	27.3355	27.8208	26.8443	27.6991	27.8577	26.9604	27.8629	27.786	30.1939	27.4244	27.6989	27.4418	28.5804	27.3122	27.1529	27.9744	27.1198	28.549	27.9018	12	10	10	10	11	10	8	11	11	11	11	10	11	11	10	10	11	9	10	11
P02763	P02763	Alpha-1-acid glycoprotein 1	ORM1	30.5345	29.9369	30.2272	28.7654	30.4362	29.8936	29.5569	29.9761	30.0333	31.2103	29.9562	29.8682	30.0909	32.3379	29.996	30.2893	31.1676	30.4197	30.317	30.5849	7	7	8	7	8	8	7	7	7	7	7	7	8	8	8	7	7	8	7	8
P02765;CON__P12763	P02765	Alpha-2-HS-glycoprotein;Alpha-2-HS-glycoprotein chain A;Alpha-2-HS-glycoprotein chain B	AHSG	29.2712	28.9641	29.8525	27.6596	29.274	28.9629	26.9289	28.9891	29.8058	30.8499	29.0133	29.2481	29.0194	29.3779	29.062	28.7435	30.1414	28.657	30.261	28.5399	8	7	8	9	7	7	6	9	8	9	8	8	7	9	9	8	9	8	7	7
P02766	P02766	Transthyretin	TTR	29.9688	29.0242	29.681	28.5062	29.5723	29.6457	27.307	29.295	30.0799	31.7657	29.5741	30.1665	29.8056	30.1671	29.8798	29.3429	30.8902	28.5724	30.624	29.2334	7	7	7	7	7	8	6	7	7	8	8	7	7	7	8	7	8	8	8	7
P02774;P02774-3;P02774-2	P02774;P02774-3;P02774-2	Vitamin D-binding protein	GC	30.4676	30.1089	30.5573	29.2573	30.6244	30.1769	29.1956	30.3411	30.6798	32.142	30.1631	30.3758	29.848	31.9216	30.5936	30.0132	31.2486	30.1466	30.9497	30.4629	26	27	28	25	27	26	23	25	27	24	25	26	25	28	26	28	22	25	21	27
P02775	P02775	Platelet basic protein;Connective tissue-activating peptide III;TC-2;Connective tissue-activating peptide III(1-81);Beta-thromboglobulin;Neutrophil-activating peptide 2(74);Neutrophil-activating peptide 2(73);Neutrophil-activating peptide 2;TC-1;Neutrophil-activating peptide 2(1-66);Neutrophil-activating peptide 2(1-63)	PPBP	22.1565	NaN	NaN	NaN	23.4574	23.5925	23.5287	NaN	23.8437	24.4801	NaN	NaN	NaN	24.9376	NaN	NaN	23.9268	23.4382	24.3653	NaN	1	NaN	NaN	NaN	1	3	1	NaN	3	2	NaN	NaN	NaN	1	NaN	NaN	2	3	3	NaN
P02776;P10720	P02776;P10720	Platelet factor 4;Platelet factor 4, short form;Platelet factor 4 variant;Platelet factor 4 variant(4-74);Platelet factor 4 variant(5-74);Platelet factor 4 variant(6-74)	PF4;PF4V1	22.4824	NaN	NaN	22.9564	22.5693	24.2929	23.4504	NaN	24.4059	NaN	NaN	NaN	NaN	24.8032	NaN	NaN	25.1074	24.3138	25.4603	22.7505	2	NaN	NaN	3	2	2	1	NaN	3	NaN	NaN	NaN	1	3	NaN	NaN	1	3	2	1
P02786;Q9UP52-2;Q9UP52-3;Q9UP52	P02786	Transferrin receptor protein 1;Transferrin receptor protein 1, serum form	TFRC	28.3204	26.9725	27.1804	28.5055	26.8553	27.1503	28.1602	28.1693	29.3795	26.7631	26.2664	25.8196	27.0122	26.6828	27.1166	27.1577	26.9445	28.4849	27.0014	25.6808	26	17	21	24	15	19	23	24	28	7	11	12	15	14	18	18	14	24	10	9
P02787;CON__Q2HJF0	P02787	Serotransferrin	TF	32.9898	32.4943	33.4332	32.1623	33.19	33.068	31.7878	32.5028	33.5973	34.6875	32.7507	33.0135	33.4103	33.5199	33.1889	32.7273	33.6683	32.5306	33.837	32.7158	41	41	43	39	42	43	39	43	41	42	40	42	43	40	39	42	42	40	37	42
P02788;P02788-2;CON__Q29443;CON__Q0IIK2	P02788;P02788-2	Lactotransferrin;Lactoferricin-H;Kaliocin-1;Lactoferroxin-A;Lactoferroxin-B;Lactoferroxin-C	LTF	29.3477	24.5841	NaN	26.8295	28.6226	26.5757	26.5672	30.071	27.607	29.6376	25.2525	28.3247	33.1421	33.1242	27.9295	30.6266	29.9166	28.6042	29.7643	31.1898	31	5	NaN	17	31	13	13	34	20	25	7	26	41	42	22	33	28	30	29	35
P02790	P02790	Hemopexin	HPX	30.9915	30.2423	30.8399	29.4941	31.023	30.9808	29.8146	30.5471	30.9164	32.5807	30.6723	30.4097	30.5996	31.7522	30.4626	30.4865	31.7431	30.545	31.6056	30.3351	21	17	21	15	21	21	16	18	18	22	19	19	19	22	17	20	19	19	20	19
P02792	P02792	Ferritin light chain	FTL	26.7756	30.1375	26.4148	26.5233	28.9593	27.0683	28.6544	29.4737	29.2943	29.7941	25.8463	28.7479	29.1332	28.5704	28.1061	27.7702	25.3678	27.2898	30.8813	27.3643	4	6	4	4	6	4	6	6	6	5	4	6	5	5	5	5	3	4	6	4
P02794	P02794	Ferritin heavy chain;Ferritin heavy chain, N-terminally processed	FTH1	26.7406	28.4051	26.0408	27.5089	28.2229	27.5121	28.3726	28.1898	28.3596	28.0866	26.5669	27.3541	28.1282	28.4587	28.3559	26.7491	26.4984	26.6524	28.9264	26.6954	5	8	5	5	6	6	9	6	8	7	5	6	6	8	6	6	7	5	9	5
P02795;Q8N339	P02795	Metallothionein-2	MT2A	20.554	24.6016	21.5888	27.5338	22.298	21.5552	24.0454	24.2575	18.7808	NaN	25.805	21.0909	20.4025	19.4453	21.2055	21.7098	NaN	21.3539	NaN	NaN	2	3	2	3	2	2	3	3	1	NaN	3	2	2	2	1	2	NaN	2	NaN	NaN
P03372-3;P03372;P03372-4;P03372-2	P03372-3;P03372;P03372-4;P03372-2	Estrogen receptor	ESR1	NaN	NaN	NaN	NaN	NaN	NaN	NaN	NaN	NaN	NaN	22.8481	21.6746	NaN	NaN	NaN	NaN	NaN	NaN	NaN	NaN	NaN	NaN	NaN	NaN	NaN	NaN	NaN	NaN	NaN	NaN	1	2	NaN	NaN	NaN	NaN	NaN	1	NaN	NaN
P03886	P03886	NADH-ubiquinone oxidoreductase chain 1	MT-ND1	24.5451	23.7892	23.6271	24.2907	23.784	23.2378	23.8719	24.1479	24.0553	NaN	23.7478	23.6189	24.2728	23.5297	23.3092	24.0745	24.3078	24.3422	23.8678	24.4186	4	3	2	3	2	3	3	2	3	NaN	3	2	2	2	2	3	1	3	2	3
P03897	P03897	NADH-ubiquinone oxidoreductase chain 3	MT-ND3	23.3708	21.8838	22.2606	22.7182	22.1947	NaN	22.3511	22.9445	22.878	NaN	22.1812	NaN	22.9357	NaN	NaN	22.6373	23.4349	23.1485	22.6453	22.572	1	1	1	1	1	NaN	1	1	1	NaN	1	NaN	1	NaN	NaN	1	1	1	1	1
P03905	P03905	NADH-ubiquinone oxidoreductase chain 4	MT-ND4	24.6144	23.2134	23.1986	22.4386	23.2029	22.129	22.8875	22.7043	22.7575	NaN	22.8707	22.6239	23.383	22.0613	22.9854	23.3578	24.5599	22.4996	22.7617	22.9001	4	3	2	2	2	2	2	3	2	NaN	2	2	3	1	1	2	2	1	1	2
P03915	P03915	NADH-ubiquinone oxidoreductase chain 5	MT-ND5	24.863	NaN	23.7896	23.9087	23.9475	23.5686	NaN	24.0354	23.7035	NaN	23.1116	23.6794	23.8467	23.5062	23.4744	24.184	24.9124	23.9944	23.4358	23.269	4	NaN	4	2	2	2	NaN	2	3	NaN	2	3	4	3	2	4	2	3	2	3
P03923	P03923	NADH-ubiquinone oxidoreductase chain 6	MT-ND6	22.6323	21.5897	21.9511	21.6684	21.7925	21.2879	NaN	22.5636	NaN	NaN	NaN	21.4991	22.5135	22.1504	NaN	22.3086	23.4977	NaN	22.8505	22.1091	1	1	1	1	1	1	NaN	1	NaN	NaN	NaN	1	1	1	NaN	1	1	NaN	1	1
P03928	P03928	ATP synthase protein 8	MT-ATP8	23.1496	22.1122	21.6396	21.6496	NaN	NaN	22.3733	21.5151	22.0134	NaN	22.354	22.093	22.3699	NaN	NaN	21.8737	NaN	22.2139	NaN	22.5159	2	1	1	2	NaN	NaN	1	1	1	NaN	1	1	1	NaN	NaN	2	NaN	2	NaN	2
P03950	P03950	Angiogenin	ANG	23.028	24.1785	23.1023	22.3035	23.4764	24.1068	22.9418	23.4247	22.5763	25.0581	23.18	24.0473	24.2517	23.4338	23.9692	22.6674	NaN	22.2677	23.502	23.5971	1	2	2	1	2	2	2	1	1	2	2	2	2	2	2	1	NaN	1	1	2
P03951-2;P03951	P03951-2;P03951	Coagulation factor XI;Coagulation factor XIa heavy chain;Coagulation factor XIa light chain	F11	NaN	22.1588	22.3282	NaN	NaN	NaN	NaN	21.7963	NaN	23.8351	NaN	NaN	NaN	NaN	NaN	NaN	NaN	NaN	NaN	NaN	NaN	1	1	NaN	NaN	NaN	NaN	1	NaN	2	NaN	NaN	NaN	NaN	NaN	NaN	NaN	NaN	NaN	NaN
P03952	P03952	Plasma kallikrein;Plasma kallikrein heavy chain;Plasma kallikrein light chain	KLKB1	25.3844	25.0204	25.8062	24.8233	25.5523	25.0914	25.0059	25.4632	25.2992	27.9167	25.1363	24.7541	NaN	26.088	25.3314	25.4229	25.6265	25.4687	26.4351	25.4896	8	5	12	3	7	11	2	9	10	16	4	7	1	8	9	7	8	5	9	7
P03973	P03973	Antileukoproteinase	SLPI	26.342	22.5944	27.0902	25.0497	26.3465	NaN	25.2918	26.5743	26.2308	26.6013	22.0457	23.5946	26.8715	30.1268	26.4202	23.6667	24.7214	23.5193	21.2547	28.637	2	1	2	2	2	NaN	2	2	2	2	2	2	2	4	2	2	2	2	1	3
P04003;CON__Q28065	P04003	C4b-binding protein alpha chain	C4BPA	28.4615	28.0354	26.9308	28.0273	27.2626	27.729	28.0356	28.668	28.2044	31.4999	26.1451	28.0413	28.3438	30.0474	28.0893	27.1927	28.1808	28.3313	29.2044	28.7279	17	14	10	16	13	13	15	19	15	22	5	16	13	21	15	10	15	15	19	16
P04004;CON__Q3ZBS7	P04004	Vitronectin;Vitronectin V65 subunit;Vitronectin V10 subunit;Somatomedin-B	VTN	28.6532	27.8232	29.3793	29.2408	29.6039	28.4804	28.6967	30.6008	28.9472	32.8435	29.0335	27.7349	27.7461	30.5538	27.4768	28.4449	29.5023	28.6827	30.2367	28.5039	12	9	14	13	14	10	11	12	10	17	12	9	9	12	10	9	11	11	14	10
P04040	P04040	Catalase	CAT	29.0167	27.9807	29.5009	29.0941	28.9419	28.4437	27.8046	28.8468	28.9508	29.1036	27.8073	28.3032	28.5392	29.8281	28.1877	28.3321	28.8885	28.5886	29.269	28.7352	24	17	24	23	21	20	18	23	25	22	14	18	20	26	22	20	22	21	21	22
P04062-4;P04062-2;P04062;P04062-5;P04062-3	P04062-4;P04062-2;P04062;P04062-5	Glucosylceramidase	GBA	24.9995	23.9715	24.5443	24.8595	24.6052	24.5449	24.3611	24.6768	24.2634	22.756	26.1027	24.6905	24.5346	24.3398	24.4074	25.0054	24.5544	24.1979	24.4828	25.383	8	4	6	6	5	4	7	4	3	1	9	7	7	5	6	8	6	4	3	8
P04066	P04066	Tissue alpha-L-fucosidase	FUCA1	26.1231	24.228	28.5764	25.1458	25.985	24.5954	24.171	24.7015	25.1381	NaN	26.2316	25.4942	25.7982	27.3022	26.2565	25.4622	26.9127	24.7888	25.7878	25.9396	10	5	11	8	10	6	3	6	5	NaN	8	7	10	11	8	8	8	7	9	7
P04070;P04070-2	P04070;P04070-2	Vitamin K-dependent protein C;Vitamin K-dependent protein C light chain;Vitamin K-dependent protein C heavy chain;Activation peptide	PROC	NaN	NaN	NaN	NaN	NaN	NaN	NaN	NaN	NaN	22.0997	NaN	NaN	NaN	21.2499	NaN	NaN	21.2736	NaN	NaN	NaN	NaN	NaN	NaN	NaN	NaN	NaN	NaN	NaN	NaN	1	NaN	NaN	NaN	2	NaN	NaN	1	NaN	NaN	NaN
P04075;P04075-2	P04075;P04075-2	Fructose-bisphosphate aldolase A	ALDOA	31.8975	31.5358	32.6688	31.2458	31.7413	31.2734	32.6346	32.5795	31.3554	31.4026	32.4533	30.9512	31.2633	31.2556	31.297	31.3193	31.2391	31.3812	31.6035	31.0467	25	24	27	25	26	24	28	26	24	16	26	23	20	24	22	26	20	23	19	24
P04080	P04080	Cystatin-B	CSTB	29.5703	28.6437	29.2726	29.3824	28.9776	28.4829	29.2206	29.1564	29.8515	29.4798	28.9584	29.2809	29.7476	29.3186	29.7419	29.2397	29.2457	29.2938	28.846	29.1348	7	6	7	9	7	7	5	6	8	6	6	7	7	8	7	7	8	8	6	8
P04083	P04083	Annexin A1	ANXA1	31.2268	31.1806	30.3376	29.3181	31.3463	29.4754	31.644	32.2378	31.2949	30.6112	32.9297	31.1123	31.3058	31.021	32.3676	30.157	30.0142	31.7847	30.8048	30.6831	23	23	21	21	23	21	24	22	23	22	24	23	23	23	23	20	19	22	22	22
P04114;CON__ENSEMBL:ENSBTAP00000032840	P04114	Apolipoprotein B-100;Apolipoprotein B-48	APOB	30.4945	30.3697	26.9938	30.0383	28.5353	29.0777	29.2394	31.0629	29.975	32.7062	28.2692	30.2811	28.8131	30.2269	30.2456	28.8097	29.4469	30.3156	30.6964	29.328	147	137	33	134	65	67	91	157	110	157	51	131	58	124	129	89	94	131	125	90
P04150-5;P04150-13;P04150-12;P04150-11;P04150-8;P04150-10;P04150;P04150-3;P04150-16;P04150-15;P04150-14;P04150-7;P04150-9;P04150-2;P04150-6	P04150-5;P04150-13;P04150-12;P04150-11;P04150-8;P04150-10;P04150;P04150-3;P04150-16;P04150-15;P04150-14;P04150-7;P04150-9;P04150-2;P04150-6	Glucocorticoid receptor	NR3C1	NaN	20.9551	21.5135	NaN	NaN	NaN	NaN	NaN	NaN	NaN	NaN	NaN	NaN	NaN	NaN	NaN	NaN	NaN	NaN	NaN	NaN	1	1	NaN	NaN	NaN	2	NaN	NaN	NaN	NaN	NaN	NaN	NaN	NaN	NaN	NaN	NaN	NaN	NaN
P04156-2;P04156	P04156-2;P04156	Major prion protein	PRNP	22.3276	23.2971	23.6047	NaN	22.5518	23.504	22.4936	21.5706	22.985	NaN	23.0939	22.9472	23.3331	NaN	22.9153	22.3717	NaN	NaN	21.9325	NaN	1	1	1	1	1	2	2	1	1	NaN	1	1	2	NaN	1	1	NaN	1	1	NaN
P04179;P04179-4;P04179-2;P04179-3	P04179;P04179-4;P04179-2;P04179-3	Superoxide dismutase [Mn], mitochondrial	SOD2	30.5835	29.9714	27.7052	30.2233	28.2373	27.9574	30.4462	29.2561	32.0479	28.5298	27.197	29.5756	30.8318	30.2211	29.71	30.1343	30.1919	27.9377	30.455	30.0766	11	11	8	10	9	9	12	9	13	6	8	12	12	12	10	11	10	8	12	11
P04180	P04180	Phosphatidylcholine-sterol acyltransferase	LCAT	NaN	NaN	NaN	NaN	NaN	NaN	NaN	NaN	NaN	23.331	NaN	NaN	NaN	NaN	NaN	NaN	NaN	NaN	NaN	NaN	NaN	NaN	NaN	NaN	NaN	NaN	NaN	NaN	NaN	1	NaN	NaN	NaN	NaN	NaN	NaN	NaN	NaN	NaN	NaN
P04181;P04181-2	P04181;P04181-2	Ornithine aminotransferase, mitochondrial;Ornithine aminotransferase, hepatic form;Ornithine aminotransferase, renal form	OAT	25.152	26.7727	26.8401	27.5589	26.9671	25.8832	25.7737	26.378	25.455	26.2354	25.1749	25.2656	25.4541	26.1372	25.5858	26.6523	25.7205	28.4722	25.6748	26.449	7	13	15	14	13	7	9	9	7	6	7	9	7	9	11	11	7	16	4	11
P04183	P04183	Thymidine kinase, cytosolic	TK1	NaN	22.2647	NaN	22.6914	22.4188	NaN	22.2048	24.5841	NaN	NaN	21.5187	NaN	NaN	NaN	NaN	22.1194	NaN	NaN	NaN	NaN	NaN	1	NaN	3	2	NaN	2	3	NaN	NaN	1	NaN	NaN	NaN	NaN	1	NaN	NaN	NaN	NaN
P04196	P04196	Histidine-rich glycoprotein	HRG	28.2006	26.8389	28.6948	26.2615	27.2404	27.8385	26.5892	27.4619	27.8322	29.2311	27.3478	27.6125	27.0308	28.2913	27.4667	27.5505	28.3009	27.622	28.1241	27.3398	11	10	10	9	9	10	8	10	10	12	11	10	9	9	10	12	12	10	10	10
P04216	P04216	Thy-1 membrane glycoprotein	THY1	25.9246	27.9899	24.4775	25.5309	26.0992	26.8852	27.3954	26.8226	25.9102	27.6398	26.181	26.9401	26.8721	26.1118	25.4241	26.1544	24.6162	25.403	25.6707	26.5473	3	3	3	2	3	3	3	3	3	3	3	3	3	3	3	3	2	3	3	3
P04217;CON__Q2KJF1	P04217	Alpha-1B-glycoprotein	A1BG	29.753	28.973	29.4059	28.1371	29.3827	29.2594	28.3253	28.7841	29.3561	30.8714	28.7946	29.2538	28.5652	30.2441	29.0348	28.9806	30.3644	28.8607	29.8731	29.4459	16	15	14	13	15	13	13	13	16	16	15	13	12	15	14	15	15	15	15	15
P04217-2	P04217-2	Alpha-1B-glycoprotein	A1BG	NaN	NaN	NaN	NaN	21.2672	NaN	NaN	NaN	21.8748	23.738	NaN	NaN	NaN	NaN	NaN	NaN	22.6794	NaN	NaN	NaN	NaN	NaN	NaN	NaN	1	NaN	NaN	NaN	1	2	NaN	NaN	NaN	NaN	NaN	NaN	2	NaN	1	NaN
P04222	P04222	HLA class I histocompatibility antigen, Cw-3 alpha chain	HLA-C	NaN	NaN	NaN	24.6787	22.9805	NaN	23.6661	NaN	NaN	NaN	NaN	NaN	23.3316	NaN	NaN	NaN	NaN	NaN	NaN	22.2927	NaN	NaN	NaN	1	1	NaN	1	NaN	NaN	NaN	NaN	NaN	1	NaN	NaN	NaN	NaN	NaN	NaN	1
P04229	P04229	HLA class II histocompatibility antigen, DRB1-1 beta chain	HLA-DRB1	NaN	NaN	NaN	NaN	NaN	NaN	NaN	NaN	NaN	NaN	NaN	24.6553	NaN	NaN	NaN	NaN	NaN	23.6297	NaN	24.1116	NaN	NaN	NaN	NaN	NaN	NaN	NaN	NaN	NaN	NaN	NaN	1	NaN	NaN	NaN	NaN	NaN	1	NaN	1
P04233-2;P04233-3	P04233-2	HLA class II histocompatibility antigen gamma chain	CD74	27.7784	26.9482	27.0471	27.7446	26.3954	24.5577	27.2721	27.5546	25.4522	25.8046	27.4181	27.3934	28.2166	26.9994	27.2898	28.1327	26.4405	25.9323	27.192	26.6893	4	3	3	4	4	2	4	5	3	3	4	3	5	3	4	5	4	3	3	3
P04264;CON__P04264	P04264;CON__P04264	Keratin, type II cytoskeletal 1	KRT1	27.9885	28.9227	27.2612	28.7416	28.0468	28.0856	27.0508	26.6879	30.233	31.0948	28.6807	27.2357	27.1566	28.4111	26.638	30.1027	27.8053	26.9655	29.4479	26.2568	15	15	14	15	14	14	11	9	18	18	14	12	10	14	10	17	12	10	14	10
P04275;P04275-2	P04275	von Willebrand factor;von Willebrand antigen 2	VWF	26.4673	26.478	25.1404	26.0521	26.8554	26.4465	25.765	25.3716	26.7877	28.2486	26.1532	27.7542	26.913	27.8574	26.4578	26.2509	26.632	26.7588	27.2362	26.2854	24	15	7	12	25	14	11	8	25	30	14	37	24	33	18	14	17	24	21	17
P04278-5;P04278;P04278-2;P04278-3;P04278-4;CON__Q6T181	P04278-5;P04278;P04278-2;P04278-3;P04278-4	Sex hormone-binding globulin	SHBG	23.69	NaN	22.0448	21.2741	22.1059	NaN	NaN	NaN	NaN	23.9811	NaN	NaN	21.9294	NaN	23.1221	NaN	NaN	NaN	NaN	NaN	3	NaN	2	1	2	NaN	NaN	NaN	NaN	2	NaN	NaN	1	NaN	2	NaN	NaN	NaN	NaN	NaN
P04350	P04350	Tubulin beta-4A chain	TUBB4A	23.928	26.2625	24.9771	25.6962	25.2866	26.0811	25.6821	24.9767	24.9269	26.2126	23.8007	24.9975	25.1236	24.547	24.9916	24.7771	NaN	24.9593	24.6362	24.8062	2	2	2	4	2	2	2	1	2	1	2	1	2	1	1	1	NaN	2	1	1
P04406	P04406	Glyceraldehyde-3-phosphate dehydrogenase	GAPDH	33.0604	33.058	33.5929	32.4858	32.6428	32.3625	33.0712	33.0467	33.1908	33.0247	33.386	32.8866	32.7354	32.9846	32.7062	32.8156	32.9947	32.9469	33.0295	32.8098	18	16	18	17	17	17	18	16	18	14	18	18	18	20	17	17	17	17	15	17
P04406-2	P04406-2	Glyceraldehyde-3-phosphate dehydrogenase	GAPDH	22.744	23.2045	23.7083	23.1843	NaN	22.9708	23.6384	24.2367	23.0711	24.5403	24.0315	23.2065	22.6724	NaN	23.5107	NaN	23.9875	23.6443	25.0542	23.0632	1	1	1	1	NaN	1	1	1	1	1	1	1	1	NaN	1	1	1	1	1	1
P04424;P04424-2;P04424-3	P04424;P04424-2;P04424-3	Argininosuccinate lyase	ASL	29.0511	24.3735	24.3736	24.4679	24.2876	24.5767	25.3015	24.058	26.017	21.2668	24.606	25.4976	25.4598	24.9533	25.4667	24.4695	24.0325	23.756	24.4064	24.8844	16	6	8	6	6	5	5	7	13	1	7	10	11	6	7	7	8	3	4	5
P04430	P04430	Ig kappa chain V-I region BAN		NaN	NaN	NaN	NaN	NaN	NaN	NaN	NaN	NaN	NaN	NaN	NaN	NaN	NaN	NaN	NaN	NaN	NaN	NaN	22.4336	NaN	NaN	NaN	NaN	NaN	NaN	NaN	NaN	NaN	NaN	NaN	NaN	NaN	NaN	NaN	NaN	NaN	NaN	NaN	1
P04433;A0A0A0MRZ8	P04433;A0A0A0MRZ8	Ig kappa chain V-III region VG	IGKV3D-11	25.6211	28.737	27.4188	25.6752	25.9718	26.0919	26.3503	26.9016	26.6717	28.3002	26.6345	26.6278	27.0206	26.7343	26.4117	26.2173	26.4388	25.7629	27.2759	26.9214	2	3	3	2	2	3	3	1	3	3	3	2	3	2	2	2	2	2	3	2
P04439	P04439	HLA class I histocompatibility antigen, A-3 alpha chain	HLA-A	26.8902	25.5973	25.9872	28.552	26.9407	23.6391	27.5659	29.3377	NaN	NaN	24.3283	26.4261	28.0436	27.51	28.6458	24.8332	26.4144	24.64	28.3359	NaN	4	3	5	5	3	1	2	11	NaN	NaN	1	3	4	6	9	2	4	1	4	NaN
P04440	P04440	HLA class II histocompatibility antigen, DP beta 1 chain	HLA-DPB1	27.2578	23.7621	22.7849	22.6255	23.7004	23.374	26.1742	NaN	NaN	NaN	NaN	23.8227	26.5577	23.8189	24.9181	25.6997	22.2131	NaN	23.8474	23.2053	5	1	1	2	2	1	4	NaN	NaN	1	NaN	3	5	1	3	4	1	NaN	2	2
P04626-5;P04626-4;P04626;P04626-3;P04626-2;P04626-6	P04626-5;P04626-4;P04626;P04626-3;P04626-2	Receptor tyrosine-protein kinase erbB-2	ERBB2	21.256	23.1676	19.0532	22.1079	27.8398	20.5619	19.2892	22.8703	19.9101	NaN	NaN	23.0767	NaN	23.308	23.2334	NaN	19.5311	NaN	NaN	22.945	4	1	1	4	17	2	1	1	1	NaN	NaN	1	NaN	1	1	NaN	2	NaN	NaN	1
P04632;Q96L46	P04632	Calpain small subunit 1	CAPNS1	29.0965	29.0072	29.7937	28.989	28.2922	28.4122	28.5901	29.2717	29.0115	27.9141	29.5061	28.881	28.8993	28.4065	29.0528	29.0072	28.8686	28.548	28.6152	28.5386	10	11	11	10	10	10	11	12	11	8	11	12	10	10	11	12	9	10	9	10
P04637-4;P04637;P04637-5;P04637-6;P04637-2;P04637-3;P04637-7;P04637-8;P04637-9	P04637-4;P04637;P04637-5;P04637-6;P04637-2;P04637-3;P04637-7;P04637-8;P04637-9	Cellular tumor antigen p53	TP53	22.2576	NaN	NaN	26.6352	NaN	24.6711	NaN	NaN	NaN	NaN	NaN	NaN	NaN	NaN	NaN	NaN	NaN	NaN	NaN	NaN	1	NaN	NaN	7	NaN	6	NaN	NaN	NaN	NaN	NaN	NaN	NaN	NaN	NaN	NaN	NaN	NaN	NaN	NaN
P04745;P19961;P04746;P19961-2;P04746-2;CON__Q3MHH8	P04745;P19961;P04746;P19961-2	Alpha-amylase 1;Alpha-amylase 2B;Pancreatic alpha-amylase	AMY1A;AMY2B;AMY2A	31.4597	NaN	18.8587	NaN	NaN	NaN	NaN	NaN	NaN	NaN	NaN	NaN	22.2593	NaN	NaN	NaN	20.7521	NaN	17.8381	NaN	23	NaN	1	NaN	NaN	NaN	NaN	NaN	NaN	NaN	NaN	NaN	4	NaN	NaN	NaN	2	NaN	1	NaN
P04792	P04792	Heat shock protein beta-1	HSPB1	31.1294	30.2003	30.1026	30.4195	31.4393	29.1994	31.442	31.0642	30.7636	29.6221	31.2536	31.604	30.1194	28.7278	30.7429	29.6037	30.1845	30.7442	30.2734	29.4247	17	15	15	16	16	14	17	16	15	13	16	17	15	13	15	15	13	15	12	15
P04839;Q9Y5S8-2;Q9Y5S8-3;Q9Y5S8	P04839	Cytochrome b-245 heavy chain	CYBB	24.7061	26.169	24.451	24.5156	26.3089	23.5394	26.197	26.8573	24.1596	26.3387	21.1238	25.5196	26.6686	27.4558	24.025	26.191	24.4172	23.8289	27.1616	24.2087	4	7	5	7	9	1	6	8	4	7	1	6	8	9	4	9	4	3	8	4
P04843	P04843	Dolichyl-diphosphooligosaccharide--protein glycosyltransferase subunit 1	RPN1	30.1826	30.591	30.2599	30.7443	30.0096	29.939	30.5357	30.4641	29.7325	29.2097	29.7632	30.0192	30.2297	29.801	30.097	30.3479	30.0756	29.8319	30.2505	30.4871	26	27	25	29	23	24	26	27	26	24	27	24	26	25	24	28	22	27	22	27
P04844;P04844-2	P04844;P04844-2	Dolichyl-diphosphooligosaccharide--protein glycosyltransferase subunit 2	RPN2	29.8103	30.209	29.8665	29.9721	29.5643	29.6156	30.0505	29.7547	29.1705	28.9767	29.4547	29.7541	29.9506	29.4474	29.5409	29.9097	29.9124	29.7468	29.8798	30.255	17	19	18	19	17	16	18	17	16	15	15	16	15	15	14	19	11	18	14	17
P04899;P04899-6;P04899-3;P04899-5;P04899-2;P04899-4	P04899;P04899-6;P04899-3;P04899-5;P04899-2;P04899-4	Guanine nucleotide-binding protein G(i) subunit alpha-2	GNAI2	28.2038	29.5742	28.3804	29.0532	29.0413	29.1035	29.4805	29.4389	28.7332	28.948	28.6535	29.1387	29.1994	29.5097	28.5888	28.9332	28.3102	28.5099	29.0883	28.4107	15	15	15	15	15	15	15	15	14	14	15	15	15	15	15	14	13	15	14	14
P04920-3;P04920-2;P04920;P48751-2;P48751;P48751-3	P04920-3;P04920-2;P04920	Anion exchange protein 2	SLC4A2	27.0428	24.0776	24.4459	24.023	24.1993	24.4215	23.7874	26.2175	26.0184	NaN	NaN	26.0945	24.0719	28.1371	24.1933	29.3474	26.4824	27.9347	28.5996	26.2527	11	1	1	2	2	1	2	2	8	NaN	NaN	6	1	2	2	1	1	2	1	1
P05023-4;P05023;P05023-3;P05023-2;P13637;P13637-3;Q13733;P20648;P54707;P54707-2	P05023-4;P05023;P05023-3;P05023-2	Sodium/potassium-transporting ATPase subunit alpha-1	ATP1A1	30.5729	29.1241	30.5761	29.7396	29.6241	29.1872	30.0981	29.6854	30.2421	28.1124	29.8169	29.8578	29.9538	29.6277	29.4893	29.6916	29.632	29.3213	29.3789	30.1627	29	27	30	31	32	29	30	27	29	18	32	30	33	30	31	30	28	28	29	33
P05026-2;P05026	P05026-2;P05026	Sodium/potassium-transporting ATPase subunit beta-1	ATP1B1	27.8829	25.0659	27.7031	24.8167	26.2991	26.3251	27.1381	26.627	27.2166	NaN	27.1467	26.9066	27.2457	26.5687	26.376	27.1913	27.1458	25.6377	26.7714	27.6175	7	4	6	4	4	5	8	6	6	NaN	7	6	7	6	5	7	7	6	5	7
P05067-7;P05067-11;P05067-8;P05067-9;P05067;P05067-3;P05067-4;P05067-5;P05067-6;P05067-10;P05067-2	P05067-7;P05067-11;P05067-8;P05067-9;P05067;P05067-3;P05067-4;P05067-5;P05067-6;P05067-10	Amyloid beta A4 protein;N-APP;Soluble APP-alpha;Soluble APP-beta;C99;Beta-amyloid protein 42;Beta-amyloid protein 40;C83;P3(42);P3(40);C80;Gamma-secretase C-terminal fragment 59;Gamma-secretase C-terminal fragment 57;Gamma-secretase C-terminal fragment 50;C31	APP	24.0002	23.7257	24.3807	23.6488	23.875	23.7674	22.6404	25.2538	25.991	23.1059	23.9921	24.5782	23.9875	23.6607	26.4222	24.437	23.5008	25.1494	22.5272	24.7118	4	3	5	4	4	3	1	7	9	1	3	6	6	3	9	4	2	7	1	4
P05089;P05089-2;P05089-3	P05089;P05089-2;P05089-3	Arginase-1	ARG1	NaN	NaN	NaN	NaN	NaN	NaN	NaN	NaN	NaN	NaN	NaN	NaN	NaN	22.4008	NaN	NaN	NaN	NaN	NaN	NaN	NaN	NaN	NaN	NaN	NaN	NaN	NaN	NaN	NaN	NaN	NaN	NaN	NaN	2	NaN	NaN	NaN	NaN	NaN	NaN
P05090	P05090	Apolipoprotein D	APOD	25.8433	24.7803	26.1383	25.4314	26.0437	25.7152	24.2449	25.1416	25.9385	27.9533	25.163	25.9385	25.0547	26.2957	25.7886	25.1629	25.8592	24.7206	26.474	24.2266	4	4	4	5	5	4	3	3	4	6	3	4	3	6	5	3	6	5	5	2
P05091;P05091-2	P05091;P05091-2	Aldehyde dehydrogenase, mitochondrial	ALDH2	29.8468	29.0253	28.6746	30.401	28.9456	27.6315	27.6467	27.755	26.6687	26.8592	29.5599	29.2612	29.6532	28.982	27.8554	29.4074	28.2926	28.3543	26.9796	28.7221	22	22	22	23	20	18	16	17	15	10	23	23	23	22	20	21	16	20	12	19
P05093	P05093	Steroid 17-alpha-hydroxylase/17,20 lyase	CYP17A1	21.2132	NaN	NaN	NaN	NaN	20.5499	NaN	NaN	NaN	NaN	NaN	NaN	NaN	22.2594	NaN	24.434	NaN	21.5582	NaN	21.2156	2	NaN	NaN	NaN	NaN	1	NaN	NaN	NaN	NaN	NaN	NaN	NaN	3	NaN	5	NaN	3	NaN	1
P05106;P05106-2;P05106-3	P05106;P05106-2;P05106-3	Integrin beta-3	ITGB3	NaN	NaN	NaN	NaN	25.2554	NaN	NaN	27.1759	27.2442	NaN	NaN	NaN	24.1249	24.6523	22.8307	NaN	24.6026	22.7343	25.3141	NaN	NaN	NaN	NaN	NaN	4	NaN	NaN	12	12	NaN	NaN	NaN	1	4	1	NaN	7	1	5	NaN
P05107	P05107	Integrin beta-2	ITGB2	25.0602	27.4396	25.9981	25.1203	28.6319	22.7041	27.3741	27.9602	27.1117	28.1052	21.1223	26.3084	28.4013	29.3402	24.9961	27.1165	24.2877	23.3151	27.3475	24.7922	9	19	10	8	23	3	20	22	16	19	3	14	22	26	8	20	5	5	16	7
P05108;P05108-2	P05108;P05108-2	Cholesterol side-chain cleavage enzyme, mitochondrial	CYP11A1	NaN	NaN	NaN	NaN	NaN	20.9328	NaN	NaN	NaN	NaN	NaN	NaN	NaN	21.3308	17.7686	21.8224	18.1213	NaN	NaN	18.4331	NaN	NaN	NaN	NaN	NaN	2	NaN	NaN	NaN	NaN	NaN	NaN	NaN	4	2	7	1	NaN	NaN	1
P05109	P05109	Protein S100-A8;Protein S100-A8, N-terminally processed	S100A8	28.3687	25.8207	NaN	25.9108	26.4259	25.7281	26.435	28.0818	27.1924	28.2812	26.5747	27.0719	28.7621	31.017	27.5565	30.6922	29.3395	29.7574	29.1031	27.864	7	3	NaN	4	7	5	5	5	4	6	4	5	6	12	5	9	7	8	10	5
P05114	P05114	Non-histone chromosomal protein HMG-14	HMGN1	25.3332	24.8703	26.0601	26.3494	25.1048	26.089	24.6907	25.2484	24.4889	22.9338	25.2453	25.6374	25.3763	26.2738	25.067	25.4402	25.4921	25.1428	23.74	25.2071	3	3	3	3	4	3	3	3	3	2	3	4	3	3	3	3	3	4	3	3
P05121-2;P05121	P05121-2;P05121	Plasminogen activator inhibitor 1	SERPINE1	NaN	22.0158	NaN	NaN	NaN	NaN	NaN	NaN	NaN	24.8801	NaN	NaN	NaN	23.9738	NaN	NaN	NaN	NaN	NaN	NaN	NaN	1	NaN	NaN	NaN	NaN	NaN	NaN	NaN	2	NaN	NaN	NaN	5	NaN	NaN	NaN	NaN	NaN	NaN
P05141	P05141	ADP/ATP translocase 2;ADP/ATP translocase 2, N-terminally processed	SLC25A5	28.6491	27.5067	27.8564	28.1368	27.1269	27.0366	28.054	27.7478	27.0487	27.2215	27.5133	26.6573	27.3617	27.4133	27.4209	27.4917	27.8616	27.4696	27.4741	27.5513	6	6	6	6	6	6	6	6	6	4	6	6	6	5	6	6	5	5	6	5
P05154	P05154	Plasma serine protease inhibitor	SERPINA5	NaN	22.458	24.6931	22.5359	25.0696	24.9597	NaN	24.9474	24.8328	26.6495	29.0242	24.6666	28.4468	30.5876	26.8552	25.4438	25.82	24.9152	24.1023	28.1565	NaN	1	7	2	6	4	NaN	6	6	7	12	6	12	13	9	7	7	7	2	12
P05155-2;P05155;P05155-3;CON__P50448	P05155-2;P05155;P05155-3	Plasma protease C1 inhibitor	SERPING1	29.3229	28.655	29.0465	28.9434	29.3734	28.9535	28.0199	29.1099	28.7147	30.6396	28.4288	28.916	30.527	30.3111	30.4234	28.8219	29.8526	28.6502	29.5496	29.4472	13	13	13	14	11	10	12	12	11	13	10	12	14	15	13	12	12	11	12	13
P05156;CON__Q32PI4	P05156	Complement factor I;Complement factor I heavy chain;Complement factor I light chain	CFI	27.0481	26.3118	26.6439	25.868	26.8909	26.821	26.3104	26.5528	26.9616	28.0968	26.7425	27.0815	26.6815	28.5754	28.1863	27.1542	28.1621	26.6118	27.4907	28.2558	11	11	13	6	15	11	12	13	12	14	13	13	13	16	17	15	14	13	15	16
P05160	P05160	Coagulation factor XIII B chain	F13B	NaN	NaN	NaN	NaN	NaN	NaN	NaN	NaN	NaN	26.9406	NaN	20.2151	NaN	21.3157	NaN	NaN	20.6925	NaN	NaN	NaN	NaN	NaN	NaN	NaN	NaN	NaN	NaN	NaN	NaN	12	NaN	1	NaN	1	NaN	NaN	1	NaN	NaN	NaN
P05161	P05161	Ubiquitin-like protein ISG15	ISG15	25.8104	27.3223	28.0857	28.8734	29.4117	27.3315	27.2132	29.7325	25.9794	27.0091	26.4868	25.2885	26.028	26.7877	26.2769	27.4394	25.2964	26.0691	27.2267	25.6218	4	7	6	6	9	7	7	7	4	7	7	4	6	6	5	7	4	5	8	3
P05164-2;P05164;P05164-3	P05164-2;P05164;P05164-3	Myeloperoxidase;Myeloperoxidase;89 kDa myeloperoxidase;84 kDa myeloperoxidase;Myeloperoxidase light chain;Myeloperoxidase heavy chain	MPO	28.5519	24.7862	20.5374	24.4529	27.2191	24.0107	25.3801	28.4832	26.7837	28.8422	23.3529	26.2951	27.7807	32.3833	25.1572	28.9261	28.2044	28.0459	28.6568	27.0021	25	5	1	6	21	4	7	23	17	23	4	13	22	33	9	25	21	21	22	15
P05165-2;P05165;P05165-3	P05165-2;P05165;P05165-3	Propionyl-CoA carboxylase alpha chain, mitochondrial	PCCA	27.3242	25.2183	25.6344	25.3933	25.2387	25.5412	26.136	23.8736	24.1537	23.9586	27.3354	25.8139	26.3997	26.8021	27.2071	25.8094	27.1714	26.3545	25.5348	27.8115	13	4	8	9	8	8	11	2	5	1	15	9	13	13	16	12	13	11	5	15
P05166;P05166-2	P05166;P05166-2	Propionyl-CoA carboxylase beta chain, mitochondrial	PCCB	27.2559	25.404	25.7745	25.5774	25.3674	25.8997	26.5973	24.3067	25.2546	NaN	27.0337	26.0446	26.7738	26.841	27.7303	26.0199	27.8057	26.4116	25.6704	26.616	18	9	9	11	10	8	17	5	6	NaN	17	13	13	16	19	10	16	14	6	16
P05186;P05186-3;P05186-2	P05186;P05186-3;P05186-2	Alkaline phosphatase, tissue-nonspecific isozyme	ALPL	23.4821	23.9407	28.0441	22.264	24.8572	24.4252	23.3585	22.8722	24.0346	NaN	23.4457	23.8438	24.9771	23.2942	24.5316	24.6462	23.5916	23.5933	24.2556	23.0643	3	3	14	2	8	4	3	3	1	NaN	3	5	3	2	8	5	3	3	4	1
P05187	P05187	Alkaline phosphatase, placental type	ALPP	26.0536	NaN	23.0514	NaN	NaN	23.722	NaN	NaN	NaN	22.792	25.4082	NaN	NaN	27.8604	26.4844	24.3746	30.153	NaN	NaN	NaN	4	NaN	1	NaN	NaN	2	NaN	NaN	NaN	1	2	NaN	NaN	2	2	3	5	NaN	NaN	NaN
P05198	P05198	Eukaryotic translation initiation factor 2 subunit 1	EIF2S1	28.0312	27.6295	27.7744	27.6452	27.6527	27.5615	28.1019	27.6125	28.0003	26.8237	27.8865	27.2822	27.4968	27.4344	27.7672	27.8284	27.4518	28.0379	27.5152	27.6822	17	15	14	14	13	14	15	15	16	7	15	16	14	14	15	17	16	14	14	16
P05204	P05204	Non-histone chromosomal protein HMG-17	HMGN2	19.2507	19.361	19.7256	22.7772	21.6266	NaN	NaN	19.5197	17.7858	NaN	18.4829	19.1171	NaN	20.0781	19.0165	19.0512	18.6614	18.5903	19.7938	NaN	1	1	1	1	1	NaN	1	1	1	NaN	1	1	NaN	1	1	1	1	1	1	NaN
P05362	P05362	Intercellular adhesion molecule 1	ICAM1	NaN	26.9244	NaN	25.0237	26.0548	21.8349	26.3779	26.2268	23.4348	24.6532	NaN	23.0045	25.8798	24.8706	23.549	24.2961	NaN	NaN	26.0689	NaN	NaN	8	NaN	6	8	1	8	9	3	3	NaN	2	9	4	2	6	NaN	NaN	6	NaN
P05386	P05386	60S acidic ribosomal protein P1	RPLP1	27.7581	27.9754	27.6791	27.9038	27.5975	27.9841	27.7275	27.6957	27.1142	26.2271	27.4023	27.5345	27.4052	27.25	28.0502	27.8525	26.7357	27.8817	27.5594	28.0112	2	2	3	3	3	3	2	2	2	1	2	3	2	2	2	3	2	2	2	3
P05387;P05386-2	P05387	60S acidic ribosomal protein P2	RPLP2	29.2872	29.5832	29.2975	29.7879	29.2955	29.5003	29.4666	29.3253	29.2949	28.2678	29.214	29.5128	29.2856	28.8111	29.5107	29.5578	29.2091	29.8333	29.0018	29.4301	6	5	5	6	5	5	7	6	5	5	6	6	5	6	6	7	6	7	6	7
P05388;P05388-2;Q8NHW5	P05388;P05388-2;Q8NHW5	60S acidic ribosomal protein P0;60S acidic ribosomal protein P0-like	RPLP0;RPLP0P6	29.4912	29.4189	29.1924	29.7073	29.1232	29.1848	29.0969	29.2062	28.9593	28.1106	29.1463	29.1549	28.9121	28.8033	29.2021	29.39	29.1578	29.6044	29.2057	29.2853	12	12	11	11	11	10	11	12	12	11	11	12	12	12	12	11	10	11	11	11
P05413	P05413	Fatty acid-binding protein, heart	FABP3	24.1391	25.3223	27.9018	25.9102	24.8738	27.5977	24.6069	23.077	25.7875	21.9773	23.217	24.2674	26.1564	25.7266	24.8052	23.2448	NaN	NaN	23.7594	NaN	6	6	10	8	5	8	5	2	7	1	2	4	9	7	6	2	NaN	NaN	3	NaN
P05452;CON__Q2KIS7	P05452	Tetranectin	CLEC3B	25.6718	26.5949	27.4864	25.6182	26.7372	27.5446	26.9754	26.5148	26.211	28.9601	26.6309	26.6584	26.9583	26.4025	26.6707	26.1078	26.4491	25.4824	26.4141	26.7036	7	7	8	6	8	7	7	8	8	9	7	7	8	8	8	7	8	6	7	8
P05455	P05455	Lupus La protein	SSB	28.9423	28.6673	29.1801	29.6081	29.15	29.8455	28.6462	28.6915	29.0363	27.7575	28.8223	29.116	28.4623	29.142	29.0848	29.2361	29.3722	29.6494	28.6088	28.8716	19	18	17	18	20	20	17	17	20	13	16	15	15	18	16	20	18	19	16	18
P05534	P05534	HLA class I histocompatibility antigen, A-24 alpha chain	HLA-A	25.6745	NaN	NaN	NaN	26.7227	NaN	NaN	27.0787	NaN	NaN	NaN	NaN	NaN	NaN	25.7646	NaN	NaN	NaN	NaN	NaN	2	NaN	NaN	NaN	2	NaN	NaN	2	NaN	NaN	NaN	NaN	NaN	NaN	2	NaN	NaN	NaN	NaN	NaN
P05543;CON__Q9TT36	P05543	Thyroxine-binding globulin	SERPINA7	24.7234	23.0311	24.8142	23.2856	25.0309	24.3669	NaN	24.6939	24.8899	26.0358	23.9959	24.1456	24.2346	25.0343	24.7684	23.6369	25.1272	24.1808	25.5803	24.2908	5	1	5	2	8	3	NaN	4	5	6	4	4	4	5	7	2	6	2	4	6
P05546;CON__ENSEMBL:ENSBTAP00000018574	P05546	Heparin cofactor 2	SERPIND1	27.5792	26.4982	26.9293	26.1848	27.0343	27.3751	25.9979	27.2724	27.8019	29.1586	27.4514	26.858	27.0705	28.0052	26.8937	27.2291	27.5592	26.7068	28.1389	27.2868	15	11	16	11	16	14	7	15	13	14	15	12	14	16	13	15	13	13	9	14
P05549-5;P05549-6;P05549;Q92754-2;P05549-2;Q92754	P05549-5;P05549-6;P05549	Transcription factor AP-2-alpha	TFAP2A	NaN	NaN	NaN	NaN	NaN	NaN	NaN	NaN	NaN	NaN	NaN	NaN	NaN	NaN	22.6325	NaN	NaN	22.389	NaN	NaN	NaN	NaN	NaN	NaN	NaN	NaN	NaN	NaN	NaN	NaN	NaN	NaN	NaN	NaN	2	NaN	NaN	1	NaN	NaN
P05556;P05556-2;P05556-5;P05556-4;P05556-3	P05556;P05556-2;P05556-5;P05556-4;P05556-3	Integrin beta-1	ITGB1	27.8368	28.599	27.3021	27.6772	28.317	28.103	28.1395	28.0629	28.3991	29.0681	28.2417	28.681	28.2343	28.376	27.942	28.3531	27.689	28.8481	27.9109	28.55	18	17	11	15	17	15	13	13	17	16	16	18	14	15	14	14	11	19	13	20
P05771-2;P05771	P05771-2;P05771	Protein kinase C beta type	PRKCB	NaN	NaN	NaN	NaN	NaN	NaN	23.1202	NaN	NaN	NaN	26.1033	23.0052	23.5391	23.1842	NaN	23.3897	NaN	NaN	25.073	NaN	NaN	NaN	NaN	NaN	NaN	NaN	1	NaN	NaN	NaN	4	1	1	3	NaN	1	NaN	NaN	1	NaN
P05783;CON__H-INV:HIT000015463	P05783	Keratin, type I cytoskeletal 18	KRT18	31.4264	31.8489	31.8986	30.737	31.3313	31.1373	31.697	32.5961	28.7709	28.2141	34.0699	32.1624	32.4369	30.9012	32.0499	31.6826	32.6633	32.6404	30.5203	32.6163	26	27	28	25	30	28	27	31	20	16	31	30	31	27	30	31	30	30	25	31
P05976-2;P05976;P08590	P05976-2;P05976;P08590	Myosin light chain 1/3, skeletal muscle isoform;Myosin light chain 3	MYL1;MYL3	24.2293	25.7553	24.5519	25.1	25.7283	25.2349	26.0404	24.9544	25.119	25.5796	25.3177	25.968	24.8736	24.9594	24.6931	24.9173	NaN	25.1445	23.262	25.2321	2	2	1	1	1	2	1	2	2	1	2	1	1	2	1	1	1	1	1	1
P05997	P05997	Collagen alpha-2(V) chain	COL5A2	24.3169	27.7436	25.3951	25.3237	26.0883	26.1004	27.1796	26.1637	25.451	28.8139	26.0309	26.6513	26.8299	26.3166	26.4872	25.7677	25.6287	26.1707	26.3524	26.8301	2	10	6	3	8	7	10	6	4	8	4	7	5	8	7	3	4	5	2	7
P06132	P06132	Uroporphyrinogen decarboxylase	UROD	25.4999	24.8993	25.32	23.8216	25.1382	25.1472	25.1302	24.3214	24.7308	23.8746	25.073	24.4897	24.7363	24.7205	25.145	24.7011	24.1325	25.0197	26.1846	24.3246	8	7	6	6	5	5	6	4	5	1	7	4	5	5	4	5	2	7	2	5
P06213-2;P06213	P06213-2;P06213	Insulin receptor;Insulin receptor subunit alpha;Insulin receptor subunit beta	INSR	22.2065	NaN	22.1229	22.0618	NaN	NaN	NaN	NaN	24.0478	NaN	NaN	NaN	NaN	NaN	NaN	21.736	22.4593	NaN	NaN	NaN	3	NaN	1	2	NaN	NaN	NaN	NaN	4	NaN	NaN	NaN	1	1	NaN	1	1	NaN	NaN	NaN
P06280	P06280	Alpha-galactosidase A	GLA	24.4632	23.9316	24.2332	23.6043	24.4037	23.4268	23.1021	23.8286	23.8912	NaN	22.2976	24.5143	24.7372	24.602	25.0231	23.8298	27.0225	26.0339	24.3391	24.6943	6	4	5	5	3	5	3	2	4	NaN	2	6	5	4	6	2	7	7	3	6
P06312	P06312	Ig kappa chain V-IV region	IGKV4-1	25.2794	28.1428	26.6089	25.1226	25.9581	25.0934	26.4145	26.355	26.7725	27.7031	26.7909	25.9634	27.4493	26.8967	25.6657	25.5247	26.6169	24.6257	27.1789	26.7152	2	3	2	2	2	2	3	3	2	2	2	2	2	2	2	3	2	2	2	2
P06331;P0DP06;A0A0C4DH41;P01825;P01824;P0DP07	P06331;P0DP06;A0A0C4DH41;P01825;P01824	Ig heavy chain V-II region ARH-77;Ig heavy chain V-II region NEWM;Ig heavy chain V-II region WAH	IGHV4-61	26.1497	28.2377	25.9033	26.1669	25.5906	25.964	28.8302	26.5597	25.7922	28.0615	26.5102	25.9281	27.3446	26.7641	25.9904	25.7061	26.9346	25.2019	28.4396	26.276	2	3	3	2	2	2	2	3	1	2	2	1	4	3	2	4	2	1	3	2
P06396;P06396-4;P06396-3;CON__Q3SX14	P06396;P06396-4;P06396-3;CON__Q3SX14	Gelsolin	GSN	30.2279	31.5816	31.3735	31.3533	31.0097	31.2008	31.1248	31.0595	30.6279	31.8028	32.6716	31.5014	31.8975	31.4782	30.8153	30.765	30.5927	30.6244	30.9598	31.0757	26	30	28	28	29	30	29	28	25	23	30	30	29	27	23	28	21	26	20	26
P06396-2	P06396-2	Gelsolin	GSN	23.5268	25.0722	24.9837	25.0757	24.4629	NaN	NaN	24.3316	24.0267	23.8429	26.2157	24.9597	25.1526	24.9757	NaN	24.0765	NaN	NaN	24.8375	24.4454	1	1	1	1	1	NaN	NaN	1	1	1	1	1	1	1	NaN	1	NaN	NaN	1	1
P06400	P06400	Retinoblastoma-associated protein	RB1	NaN	NaN	NaN	24.0859	NaN	NaN	23.9271	NaN	NaN	NaN	NaN	23.8944	NaN	NaN	23.4329	NaN	24.2367	NaN	NaN	NaN	1	NaN	NaN	1	NaN	NaN	1	NaN	NaN	NaN	NaN	1	NaN	NaN	1	NaN	2	NaN	NaN	NaN
P06401;P06401-2;P06401-5;P06401-4;P06401-3	P06401;P06401-2;P06401-5	Progesterone receptor	PGR	NaN	NaN	NaN	NaN	NaN	21.0523	NaN	NaN	NaN	NaN	26.9572	27.0149	23.9805	24.3943	NaN	25.6258	25.8676	26.1363	NaN	25.9315	NaN	NaN	NaN	NaN	NaN	1	NaN	NaN	NaN	NaN	12	14	4	6	NaN	9	7	13	NaN	8
P06454-2;P06454	P06454-2;P06454	Prothymosin alpha;Prothymosin alpha, N-terminally processed;Thymosin alpha-1	PTMA	27.2853	27.2584	27.1129	28.4164	27.3215	28.2761	27.9304	27.7838	26.0564	25.9192	27.5124	28.0794	27.1018	27.4018	27.4172	28.022	27.3945	27.7633	27.4396	26.3331	7	7	7	8	6	7	7	7	7	6	7	7	7	7	7	7	7	7	7	7
P06493;P06493-2	P06493;P06493-2	Cyclin-dependent kinase 1	CDK1	23.204	25.9118	22.7912	26.8288	27.2948	25.6032	25.6142	24.9815	28.8478	23.4748	28.1808	23.7401	23.6116	24.6948	27.6087	25.7247	26.4038	27.5014	26.4413	23.2362	3	9	2	10	10	6	8	9	2	1	5	2	2	1	1	8	1	11	2	2
P06576	P06576	ATP synthase subunit beta, mitochondrial	ATP5B	32.7503	31.2902	31.4848	31.8158	31.1968	31.7049	31.9456	31.6457	31.5515	30.5983	31.6156	31.4315	31.6151	31.5474	31.889	31.7033	32.5062	31.9287	31.4566	31.9209	25	25	25	25	24	24	25	25	23	23	25	25	25	23	23	25	24	25	23	25
P06681;P06681-3;P06681-2	P06681;P06681-3;P06681-2	Complement C2;Complement C2b fragment;Complement C2a fragment	C2	26.501	26.6679	26.4694	26.8244	26.4638	26.4077	26.2965	26.1381	26.4796	26.8469	25.5096	25.9918	26.6115	27.0497	25.5629	26.3202	25.7473	26.2499	27.0174	27.1254	11	14	14	14	14	13	12	12	13	11	10	11	12	14	8	14	8	13	12	14
P06702	P06702	Protein S100-A9	S100A9	28.891	26.4191	24.9178	26.7236	27.0758	26.8119	27.0023	28.6535	27.9965	28.8223	27.3585	27.6218	29.5967	31.6795	28.4156	31.1888	30.0104	29.9862	29.5471	28.375	5	5	5	5	5	5	5	6	6	5	5	5	6	9	5	9	6	6	7	6
P06703	P06703	Protein S100-A6	S100A6	31.766	28.6193	30.8525	30.8336	29.7917	28.697	31.0645	31.8182	26.4459	29.9224	29.9826	28.8648	28.5534	28.62	30.4323	29.2523	24.1494	29.3883	30.2841	28.8133	4	3	3	3	3	3	3	3	3	2	3	3	3	3	3	3	3	3	3	3
P06727	P06727	Apolipoprotein A-IV	APOA4	27.7673	27.3694	28.2461	27.5299	27.9168	27.5541	26.0728	28.2966	28.1633	30.5132	27.7242	28.4551	27.693	28.8185	28.3155	27.8001	29.7156	26.738	29.0047	27.3839	16	16	18	18	19	12	13	18	19	19	17	17	20	20	20	16	19	13	17	18
P06730;P06730-3;P06730-2;A6NMX2	P06730;P06730-3;P06730-2	Eukaryotic translation initiation factor 4E	EIF4E	26.8412	26.0223	25.8981	25.7888	26.0975	26.2844	25.9345	26.5219	25.5329	25.8408	26.3545	26.0846	26.097	26.1069	26.228	26.4954	26.28	26.6594	26.1788	26.2591	7	6	6	6	6	6	4	6	5	3	5	7	6	6	6	6	5	7	4	6
P06731-2;P06731	P06731-2;P06731	Carcinoembryonic antigen-related cell adhesion molecule 5	CEACAM5	23.097	NaN	NaN	NaN	NaN	NaN	NaN	NaN	NaN	NaN	NaN	NaN	NaN	NaN	22.4928	NaN	NaN	22.7958	NaN	NaN	1	NaN	NaN	NaN	NaN	NaN	NaN	NaN	NaN	NaN	NaN	NaN	NaN	NaN	1	NaN	1	1	NaN	NaN
P06733	P06733	Alpha-enolase	ENO1	33.2821	32.4753	33.0493	32.3686	32.2235	32.0988	32.3168	32.9573	31.8854	32.1317	32.4427	32.1179	32.2198	32.5723	31.7421	32.375	32.2866	32.4242	32.4806	31.9812	21	20	21	21	21	21	21	22	21	21	21	20	21	22	19	22	20	21	20	22
P06733-2	P06733-2	Alpha-enolase	ENO1	21.3374	NaN	NaN	NaN	NaN	NaN	NaN	NaN	NaN	NaN	NaN	NaN	NaN	22.1122	NaN	22.2796	NaN	NaN	NaN	NaN	1	NaN	NaN	NaN	NaN	NaN	NaN	NaN	NaN	NaN	NaN	NaN	NaN	1	NaN	1	NaN	NaN	NaN	NaN
P06737-2;P06737	P06737-2;P06737	Glycogen phosphorylase, liver form	PYGL	27.5379	27.9206	27.5118	29.105	27.4081	27.9281	27.5199	27.3988	28.7581	28.3996	28.4707	27.9857	27.9364	29.3797	27.8034	27.6714	28.0603	27.5866	27.76	27.4668	28	29	14	37	22	29	23	22	34	27	33	29	27	36	27	27	21	26	20	20
P06744;P06744-2	P06744;P06744-2	Glucose-6-phosphate isomerase	GPI	30.6152	30.4798	31.4732	30.5957	30.2286	30.1348	31.0956	30.9321	30.2924	30.1489	31.0958	30.3502	30.6231	30.6896	30.6681	30.7613	30.6902	30.7983	29.9753	30.2844	24	24	26	22	21	20	25	23	20	16	24	23	24	22	20	23	19	21	19	20
P06746	P06746	DNA polymerase beta	POLB	22.1686	NaN	22.9974	22.9796	22.2914	22.1186	NaN	NaN	22.561	NaN	22.0246	22.3567	NaN	22.2696	22.8316	22.6003	22.8788	22.6389	NaN	22.8313	1	NaN	2	3	1	2	NaN	NaN	2	NaN	2	1	NaN	1	1	1	2	1	NaN	2
P06748-2;P06748;P06748-3	P06748-2;P06748;P06748-3	Nucleophosmin	NPM1	31.0633	30.5847	31.0866	30.4262	30.4864	30.5752	30.4176	30.1316	31.3581	29.2351	30.6452	30.4931	30.4665	30.3904	30.4481	30.5244	31.3455	31.2744	30.4655	31.2925	8	8	8	7	9	9	8	9	8	7	9	9	8	10	8	9	8	8	8	8
P06753	P06753	Tropomyosin alpha-3 chain	TPM3	NaN	NaN	NaN	26.0905	NaN	NaN	26.9027	NaN	NaN	NaN	26.6535	NaN	NaN	NaN	NaN	26.0996	NaN	24.4294	NaN	23.4145	NaN	NaN	NaN	1	NaN	NaN	1	NaN	NaN	NaN	2	NaN	NaN	NaN	NaN	2	NaN	2	NaN	2
P06753-2;P06753-3	P06753-2;P06753-3	Tropomyosin alpha-3 chain	TPM3	29.3503	30.273	29.6833	29.5483	29.9537	29.4715	30.0638	30.1357	29.9822	29.7445	29.9832	30.1809	29.8607	29.7027	29.6428	30.55	29.798	29.7197	30.0423	29.7225	11	13	12	12	12	12	11	12	11	11	11	13	11	12	13	13	12	12	11	12
P06753-6	P06753-6	Tropomyosin alpha-3 chain	TPM3	NaN	21.7813	NaN	NaN	NaN	NaN	NaN	22.0253	NaN	NaN	21.9805	NaN	21.9045	21.6626	NaN	21.5204	NaN	20.9334	NaN	NaN	NaN	1	NaN	NaN	NaN	NaN	NaN	1	NaN	NaN	1	NaN	1	1	NaN	1	NaN	1	NaN	NaN
P06756-3;P06756;P06756-2	P06756-3;P06756;P06756-2	Integrin alpha-V;Integrin alpha-V heavy chain;Integrin alpha-V light chain	ITGAV	24.928	27.8663	26.5656	26.1291	27.1008	26.2612	26.9224	27.5568	27.5125	26.919	25.8911	26.2287	25.5914	25.9734	27.1448	25.7744	25.1436	26.2769	26.4116	26.17	4	26	16	16	23	11	18	23	16	16	14	16	12	12	20	9	7	18	10	8
P06865;P06865-2	P06865	Beta-hexosaminidase subunit alpha	HEXA	25.7735	25.9866	28.5049	25.5735	26.8998	26.2371	25.0519	25.8778	25.7074	25.3879	25.7908	26.2271	27.0997	25.18	27.3982	26.4426	26.9935	26.7624	26.9393	26.7979	9	9	11	7	10	7	6	9	7	6	9	8	11	6	10	10	8	11	11	8
P06870;P06870-2	P06870;P06870-2	Kallikrein-1	KLK1	NaN	NaN	NaN	NaN	NaN	NaN	NaN	NaN	NaN	NaN	26.6451	NaN	NaN	NaN	NaN	NaN	NaN	NaN	NaN	NaN	NaN	NaN	NaN	NaN	NaN	NaN	NaN	NaN	NaN	NaN	4	NaN	NaN	NaN	NaN	NaN	NaN	NaN	NaN	NaN
Q16778;P06899;P33778;Q8N257	Q16778;P06899;P33778;Q8N257	Histone H2B type 2-E;Histone H2B type 1-J;Histone H2B type 1-B;Histone H2B type 3-B	HIST2H2BE;HIST1H2BJ;HIST1H2BB;HIST3H2BB	28.2569	29.1418	29.2378	29.1808	29.117	29.1907	29.7255	28.9116	28.6236	25.7493	28.8954	29.7339	28.9554	29.3661	28.8798	29.0912	27.9961	28.6658	28.1243	28.1913	2	2	2	2	2	2	2	2	2	1	2	2	2	2	2	2	2	2	1	2
P07093-2;P07093-3;P07093	P07093-2;P07093-3;P07093	Glia-derived nexin	SERPINE2	22.9726	21.1903	23.4209	24.1575	25.8129	27.8833	22.0419	26.5593	24.2321	25.7232	24.3823	26.29	25.2956	23.5455	25.0127	22.6569	NaN	24.86	24.3187	26.5986	1	1	4	4	7	11	1	11	4	6	6	8	7	3	6	2	NaN	6	4	12
P07099	P07099	Epoxide hydrolase 1	EPHX1	28.1198	28.5575	29.4265	29.6487	29.6479	29.4462	28.8189	29.3255	29.8321	27.9246	29.3794	29.906	29.9043	31.0175	32.3068	30.4842	30.1964	28.7438	29.2444	30.851	20	19	18	19	19	19	19	19	17	12	19	19	20	20	23	21	19	16	20	20
P07108;P07108-3;P07108-2;P07108-4;P07108-5;P07108-6	P07108;P07108-3;P07108-2;P07108-4;P07108-5	Acyl-CoA-binding protein	DBI	24.2991	23.3909	23.5234	24.6772	24.2108	23.002	25.1557	23.879	22.8557	NaN	24.9676	24.8929	24.755	24.0605	24.8667	24.5576	23.757	23.6218	NaN	24.9876	2	1	2	2	1	2	3	2	1	NaN	3	3	2	1	3	2	1	1	NaN	2
P07195	P07195	L-lactate dehydrogenase B chain	LDHB	28.3048	31.0926	31.306	30.8409	30.9098	31.358	30.9039	30.3281	31.7033	29.634	29.2026	31.4823	31.7359	30.9352	31.8925	31.4132	32.4894	32.0569	33.8975	31.067	13	16	15	16	16	15	15	16	16	12	15	15	16	15	16	16	16	16	16	16
P07196;Q16352	P07196;Q16352	Neurofilament light polypeptide;Alpha-internexin	NEFL;INA	NaN	NaN	NaN	NaN	NaN	NaN	NaN	NaN	NaN	NaN	NaN	NaN	NaN	NaN	NaN	NaN	NaN	23.0354	NaN	NaN	NaN	NaN	NaN	NaN	NaN	NaN	NaN	NaN	NaN	NaN	NaN	NaN	NaN	NaN	NaN	NaN	NaN	1	NaN	NaN
P07203;P07203-2	P07203	Glutathione peroxidase 1	GPX1	29.2268	28.9181	28.0493	28.6496	28.8675	27.7679	29.0203	28.7229	27.5248	28.4482	28.8943	28.7819	28.6686	28.575	28.6583	28.0269	28.6315	28.1998	28.821	27.7564	14	15	12	13	14	11	14	12	13	11	14	14	14	13	14	12	11	13	14	12
P07225;CON__P07224	P07225	Vitamin K-dependent protein S	PROS1	24.0575	24.3729	23.9411	23.7295	23.0808	24.0563	24.0444	25.0231	24.7762	28.1251	23.2743	24.1021	22.7354	26.4444	23.3987	22.4036	24.9895	24.3262	26.1459	24.0995	4	5	2	3	2	4	2	8	5	13	2	3	1	10	4	1	5	3	7	4
P07237	P07237	Protein disulfide-isomerase	P4HB	31.2545	31.2973	31.3062	29.997	31.7594	30.2458	31.2936	31.2565	31.0901	30.612	30.5781	30.6732	31.453	30.8787	31.4592	31.7121	30.174	30.7507	30.9808	31.8336	26	26	28	24	28	22	28	24	25	19	27	23	25	25	26	27	22	27	24	25
P07305;P07305-2	P07305;P07305-2	Histone H1.0;Histone H1.0, N-terminally processed	H1F0	24.5109	26.9361	28.1522	27.7708	28.0377	28.052	27.0174	26.6972	27.9642	26.1451	28.6867	29.4471	28.6146	29.2609	29.1732	27.8807	28.444	26.9016	27.8105	27.9243	5	5	6	6	6	6	6	5	6	4	6	6	6	6	5	6	5	6	5	6
P07311	P07311	Acylphosphatase-1	ACYP1	23.1839	NaN	22.5737	23.5278	22.4163	22.724	23.5034	23.3736	NaN	NaN	24.8699	NaN	22.8331	22.3064	NaN	22.6463	NaN	22.5537	23.4759	22.697	2	1	2	3	1	2	1	2	NaN	NaN	3	NaN	2	1	NaN	2	NaN	2	1	1
P07332-2;P07332-4;P07332-3;P07332	P07332-2;P07332-4;P07332-3;P07332	Tyrosine-protein kinase Fes/Fps	FES	NaN	20.5138	21.3923	NaN	NaN	NaN	21.444	NaN	NaN	21.2107	NaN	20.3526	21.2979	21.7229	NaN	21.1122	NaN	NaN	21.5245	20.8099	NaN	1	1	NaN	NaN	1	1	NaN	NaN	1	NaN	1	2	1	NaN	1	NaN	NaN	1	1
P07339	P07339	Cathepsin D;Cathepsin D light chain;Cathepsin D heavy chain	CTSD	29.775	30.108	30.9088	30.4882	30.2546	28.772	30.2723	30.7541	30.9549	30.2637	30.4009	30.1239	29.8841	30.1116	30.8554	29.7396	29.2941	28.9677	30.2693	29.0172	14	15	15	15	15	12	15	16	16	15	16	15	16	16	14	16	12	11	14	14
P07355;P07355-2;A6NMY6	P07355;P07355-2;A6NMY6	Annexin A2;Putative annexin A2-like protein	ANXA2;ANXA2P2	32.2979	33.1641	32.3725	31.5676	32.1199	31.7244	32.7707	32.9626	31.8619	32.7122	33.3498	32.6321	32.8245	32.0425	32.6347	32.149	32.8105	32.1431	32.6893	32.0251	24	25	24	25	24	23	25	24	24	23	24	24	25	24	25	25	22	25	22	25
P07357	P07357	Complement component C8 alpha chain	C8A	26.566	26.681	27.0687	25.8795	26.8248	26.8563	26.6772	26.9854	26.5053	29.2284	26.4382	26.1189	26.2921	26.9947	26.5466	26.0318	26.6794	26.5915	27.1072	26.5452	12	12	13	10	12	11	10	12	10	14	11	8	11	11	9	11	10	10	11	10
P07358	P07358	Complement component C8 beta chain	C8B	26.6722	26.8862	27.7242	26.1176	27.1601	27.3057	27.0483	27.0773	26.9397	29.6505	26.9768	26.4949	26.83	27.4757	27.1969	26.3672	27.4416	26.6389	27.3274	27.1504	13	14	18	13	14	16	14	16	11	19	12	14	11	17	14	13	11	15	14	12
P07360	P07360	Complement component C8 gamma chain	C8G	24.9819	25.2481	26.199	24.4657	25.7848	26.0795	25.5025	25.8869	24.84	28.1731	25.2349	25.09	25.4099	26.0357	25.587	25.0874	26.2734	24.6674	24.7028	25.4545	5	7	7	5	8	6	5	7	4	6	4	4	3	8	6	4	8	1	3	7
P07384	P07384	Calpain-1 catalytic subunit	CAPN1	29.5545	29.1612	30.2047	29.0174	29.2083	28.746	29.4041	29.347	29.775	28.186	29.9498	29.3449	29.4324	29.3361	29.5292	29.4076	29.2988	29.019	29.4001	29.0973	33	31	34	35	30	28	33	34	35	15	34	31	31	32	35	34	26	29	26	31
P07437;A6NNZ2	P07437	Tubulin beta chain	TUBB	29.6301	30.9729	30.3244	30.9124	30.691	30.8723	30.8096	30.8087	30.759	30.6103	29.7715	30.4262	30.1022	29.9514	30.3227	30.7967	30.319	30.72	30.4705	30.5796	5	6	6	6	6	5	6	5	5	5	5	6	5	5	5	6	5	5	5	5
P07451	P07451	Carbonic anhydrase 3	CA3	NaN	20.581	NaN	NaN	NaN	21.2097	NaN	19.7278	NaN	NaN	NaN	NaN	NaN	NaN	NaN	NaN	NaN	NaN	NaN	NaN	NaN	1	NaN	NaN	NaN	1	NaN	1	NaN	NaN	NaN	NaN	NaN	NaN	NaN	NaN	NaN	NaN	NaN	NaN
P07476	P07476	Involucrin	IVL	NaN	NaN	NaN	NaN	NaN	NaN	NaN	NaN	NaN	NaN	NaN	26.2777	NaN	NaN	26.8118	20.9574	NaN	27.4084	NaN	NaN	NaN	NaN	NaN	NaN	NaN	NaN	NaN	NaN	NaN	NaN	NaN	12	NaN	NaN	14	2	1	14	NaN	NaN
P07585;P07585-2;P07585-3;P07585-4;P07585-5	P07585;P07585-2	Decorin	DCN	26.5381	29.8757	29.098	26.9499	28.3379	29.9349	29.8844	27.9891	28.5104	30.7449	27.9992	29.6388	30.5596	28.4881	29.588	27.4816	27.7229	27.3729	28.5024	28.5508	9	13	12	6	9	13	12	9	10	10	10	11	12	9	12	9	6	8	9	8
P07602;P07602-2;P07602-3	P07602;P07602-2;P07602-3	Prosaposin;Saposin-A;Saposin-B-Val;Saposin-B;Saposin-C;Saposin-D	PSAP	28.0194	27.7941	28.6701	27.6506	28.1577	26.7439	27.4953	27.9346	29.7833	27.3465	27.0119	27.6895	27.6958	27.6071	28.2013	27.4959	26.5107	27.8168	28.043	26.9151	13	12	13	11	13	9	11	13	15	6	11	12	12	11	11	10	9	11	11	8
P07686	P07686	Beta-hexosaminidase subunit beta;Beta-hexosaminidase subunit beta chain B;Beta-hexosaminidase subunit beta chain A	HEXB	26.7727	27.2168	28.8939	26.2695	27.5094	26.9285	26.7244	27.2419	28.8944	26.5978	26.7946	27.4445	28.1061	28.3059	29.3337	27.7924	27.9505	27.8321	27.7601	27.9172	12	12	15	11	12	11	11	12	15	7	12	13	13	14	16	15	12	11	11	13
P07711	P07711	Cathepsin L1;Cathepsin L1 heavy chain;Cathepsin L1 light chain	CTSL	24.5955	24.9943	24.9655	25.0406	24.2823	24.1742	25.0668	25.3125	24.7583	24.9403	24.9855	24.3805	25.4695	25.2228	25.1021	24.6277	23.9218	24.1978	25.5536	24.6677	3	3	3	3	3	2	3	3	4	3	3	3	3	3	3	3	3	3	3	3
P07737;CON__P02584	P07737;CON__P02584	Profilin-1	PFN1	30.4392	31.35	30.5879	32.0294	31.4167	30.5191	31.1117	31.3361	31.0024	31.0232	30.7302	30.9931	31.2646	31.3996	30.7204	31.2902	30.5126	31.0939	31.1968	30.9943	8	8	8	8	8	7	8	8	8	7	8	8	8	8	8	8	8	8	8	8
P07738	P07738	Bisphosphoglycerate mutase	BPGM	23.2181	22.4559	21.9265	NaN	23.2802	23.6812	23.1307	23.562	23.9639	24.0088	NaN	23.2236	22.0189	NaN	NaN	NaN	21.9921	23.1636	24.5082	22.8983	2	1	1	NaN	3	2	1	2	3	2	NaN	1	1	NaN	NaN	NaN	1	1	4	2
P07741;P07741-2	P07741;P07741-2	Adenine phosphoribosyltransferase	APRT	28.9234	27.4451	28.6701	26.6249	27.3651	27.5179	27.4998	27.5773	28.5644	26.4362	29.4592	27.6135	27.7427	27.7255	27.9185	27.6364	27.39	27.3596	27.1674	26.4476	10	9	10	9	10	9	9	9	10	8	10	9	9	8	10	9	9	8	8	8
P07814	P07814	Bifunctional glutamate/proline--tRNA ligase;Glutamate--tRNA ligase;Proline--tRNA ligase	EPRS	29.9028	29.3052	29.501	29.4527	29.5731	29.2738	29.3024	29.2694	29.9943	28.4937	29.1345	29.0976	29.2493	28.989	29.708	29.6875	29.8139	29.358	29.3177	29.5874	57	54	51	51	56	50	49	52	54	27	50	47	53	49	55	57	48	49	39	52
P07858	P07858	Cathepsin B;Cathepsin B light chain;Cathepsin B heavy chain	CTSB	29.235	29.9239	31.2814	29.0387	29.0765	28.0012	29.6111	30.003	30.0053	29.433	29.9304	30.8858	30.3641	29.7318	29.7483	30.5834	28.9313	30.4051	29.4372	30.0478	10	11	11	11	10	10	10	10	11	9	10	10	11	11	11	11	9	10	10	11
P07900;P07900-2;Q14568;Q58FG0	P07900;P07900-2	Heat shock protein HSP 90-alpha	HSP90AA1	31.7114	31.0009	31.412	31.0439	31.5898	31.0301	30.8911	31.6494	31.5844	30.1764	31.879	30.9887	31.0423	31.2964	30.9194	31.3375	31.5883	31.8172	30.9273	30.9168	24	20	21	24	23	19	23	24	24	17	24	21	20	25	21	23	23	24	19	21
P07910;P07910-3;B2RXH8	P07910;P07910-3	Heterogeneous nuclear ribonucleoproteins C1/C2	HNRNPC	NaN	22.8675	NaN	NaN	NaN	NaN	21.8617	NaN	22.0855	NaN	NaN	NaN	NaN	NaN	NaN	NaN	NaN	21.888	NaN	NaN	NaN	1	NaN	NaN	NaN	NaN	1	NaN	1	NaN	NaN	NaN	NaN	NaN	NaN	NaN	NaN	1	NaN	NaN
P07910-2;P07910-4	P07910-2;P07910-4	Heterogeneous nuclear ribonucleoproteins C1/C2	HNRNPC	29.9031	29.595	29.84	30.2865	29.9096	30.1945	29.665	29.8817	29.9068	28.5897	29.5802	29.7754	29.6789	29.7297	29.6961	30.0189	30.2275	30.1484	29.6367	29.8385	10	12	12	13	11	12	11	12	12	8	12	12	10	12	10	12	14	12	13	13
P07919;A0A096LP55	P07919	Cytochrome b-c1 complex subunit 6, mitochondrial	UQCRH	26.6951	25.1944	27.1446	24.8394	26.3466	24.2978	27.6015	26.5686	24.5392	NaN	26.0386	25.2654	25.0555	25.592	25.7646	25.5129	26.0142	26.2346	25.5417	25.4556	3	3	3	4	3	1	4	3	2	NaN	3	2	2	3	3	3	3	3	1	3
P07942	P07942	Laminin subunit beta-1	LAMB1	27.8479	27.9756	27.5738	26.9271	29.3848	29.2279	27.4868	27.221	30.3173	29.6174	28.7598	29.2548	28.6955	29.2748	28.8926	28.9378	27.5588	28.7992	28.4904	28.7241	31	26	21	21	42	37	23	18	43	30	37	37	35	32	35	42	18	36	27	40
P07947;P06241-3;P06241-2;P06241	P07947	Tyrosine-protein kinase Yes	YES1	23.1506	23.1249	22.707	22.6421	22.6788	22.8544	22.8094	23.4517	NaN	22.5918	22.6984	22.4583	22.8139	23.507	22.5358	23.2552	23.6068	22.867	22.403	22.7842	4	3	4	2	2	1	2	4	NaN	1	1	1	1	3	1	2	4	3	1	2
P07948	P07948	Tyrosine-protein kinase Lyn	LYN	25.9613	25.2617	25.0059	24.3962	25.8223	24.0587	25.2658	25.6257	25.2941	25.1228	24.8454	25.3421	25.3183	26.7398	25.9026	25.3104	25.1946	25.0926	26.1556	24.9527	12	8	5	4	10	3	8	12	7	3	4	8	8	18	12	9	4	7	12	8
P07951-2	P07951-2			27.424	31.0748	28.7858	29.2964	29.6652	30.0355	30.2554	29.5963	29.5337	30.1697	28.8605	30.6051	30.1504	28.3878	28.9396	28.7899	27.3619	28.8976	29.4313	30.616	5	10	6	9	8	10	10	6	9	9	6	10	11	6	7	9	6	7	10	11
P07954-2;P07954	P07954-2;P07954	Fumarate hydratase, mitochondrial	FH	29.8885	28.2056	28.7023	28.8063	28.3793	28.2436	29.0438	28.2459	28.2869	26.9422	27.868	27.8032	28.0467	27.8654	28.8979	29.1043	30.2868	28.4911	28.1705	28.8118	15	12	12	14	14	11	13	14	13	9	13	11	12	11	11	14	11	13	11	13
P07988	P07988	Pulmonary surfactant-associated protein B	SFTPB	NaN	NaN	NaN	NaN	NaN	NaN	NaN	NaN	NaN	NaN	NaN	NaN	NaN	NaN	22.5888	NaN	NaN	NaN	NaN	NaN	NaN	NaN	NaN	NaN	NaN	NaN	NaN	NaN	NaN	NaN	NaN	NaN	NaN	NaN	1	NaN	NaN	NaN	NaN	NaN
P07992-4;P07992;P07992-3	P07992-4;P07992;P07992-3	DNA excision repair protein ERCC-1	ERCC1	NaN	NaN	NaN	19.9815	20.2621	20.379	NaN	20.243	20.0678	NaN	20.4136	NaN	NaN	NaN	NaN	20.6279	NaN	NaN	NaN	20.2389	NaN	NaN	NaN	1	1	1	NaN	1	1	NaN	1	NaN	NaN	NaN	NaN	1	NaN	NaN	NaN	1
P07996;P07996-2;CON__Q28194	P07996;P07996-2;CON__Q28194	Thrombospondin-1	THBS1	26.271	31.3358	27.9471	29.604	29.1386	30.9253	31.8132	28.6007	28.3413	32.4762	28.5579	30.1082	27.8707	28.7466	27.5649	28.2759	27.9337	28.0555	30.2107	31.3621	9	46	23	38	32	38	47	26	24	48	24	36	20	27	18	27	17	25	33	47
P07998	P07998	Ribonuclease pancreatic	RNASE1	NaN	24.3616	27.8556	23.201	25.7962	NaN	NaN	23.1257	NaN	25.9624	23.6343	23.1218	25.4967	23.4898	24.2753	22.8328	22.4209	NaN	22.9804	24.175	NaN	2	5	3	3	NaN	NaN	1	NaN	4	1	1	4	2	2	1	1	NaN	1	2
P08047-3;P08047	P08047-3;P08047	Transcription factor Sp1	SP1	NaN	22.036	NaN	22.5548	NaN	NaN	NaN	22.2639	NaN	NaN	22.0613	NaN	NaN	NaN	NaN	NaN	22.5485	22.9644	NaN	21.5016	NaN	2	NaN	2	NaN	NaN	NaN	1	NaN	NaN	1	NaN	NaN	1	NaN	NaN	2	1	NaN	1
P08069	P08069	Insulin-like growth factor 1 receptor;Insulin-like growth factor 1 receptor alpha chain;Insulin-like growth factor 1 receptor beta chain	IGF1R	NaN	NaN	22.1207	NaN	NaN	NaN	NaN	NaN	NaN	NaN	NaN	NaN	NaN	NaN	22.0493	NaN	NaN	NaN	NaN	NaN	NaN	NaN	1	NaN	NaN	NaN	NaN	NaN	NaN	NaN	NaN	NaN	NaN	NaN	1	NaN	NaN	NaN	NaN	NaN
P08123	P08123	Collagen alpha-2(I) chain	COL1A2	28.6461	31.297	30.3568	28.4621	30.828	31.9817	30.2899	29.6774	30.1055	31.8071	31.2401	31.3518	31.4289	29.9915	31.5485	30.6173	29.9333	29.9848	30.2388	30.712	10	23	22	11	20	23	19	19	15	20	27	21	19	15	21	18	16	20	14	21
P08133;P08133-2	P08133;P08133-2	Annexin A6	ANXA6	28.8031	31.363	29.6875	29.652	31.3158	32.1924	30.8717	29.9482	30.745	30.9478	30.3336	30.4718	30.5413	30.8072	30.0116	30.4231	29.4906	29.919	31.1349	29.8978	29	37	33	30	35	34	36	30	33	31	34	35	35	31	33	35	30	30	31	32
P08134	P08134	Rho-related GTP-binding protein RhoC	RHOC	25.0568	25.3138	25.3933	24.6356	24.7711	24.8569	24.5833	25.7628	25.5023	23.9967	24.8105	25.2157	24.983	24.5666	24.2986	24.8099	23.463	24.6623	23.754	24.4074	1	1	1	2	1	2	2	1	1	1	1	1	1	1	1	1	1	1	1	1
P08174-2;P08174-4;P08174;P08174-3;P08174-5;P08174-6;P08174-7	P08174-2;P08174-4;P08174;P08174-3;P08174-5;P08174-6;P08174-7	Complement decay-accelerating factor	CD55	25.3937	25.5346	27.3751	25.2977	27.0019	25.4144	24.832	26.1758	25.9796	26.3266	23.4812	25.7417	26.1173	23.6649	26.3171	23.6016	26.53	23.6936	24.7633	25.6153	5	5	8	3	8	3	4	5	7	5	2	6	6	2	9	3	5	2	4	6
P08185	P08185	Corticosteroid-binding globulin	SERPINA6	25.8834	24.9855	25.6052	24.6943	25.4269	24.783	24.4927	25.1285	25.7003	26.7817	24.8791	25.5306	25.8347	26.3792	25.0546	25.0924	26.2647	25.1352	25.7965	25.0358	4	2	3	2	2	2	2	3	3	5	3	4	5	4	3	3	3	3	3	3
P08195-2;P08195-3;P08195;P08195-4	P08195-2;P08195-3;P08195;P08195-4	4F2 cell-surface antigen heavy chain	SLC3A2	25.923	26.7633	26.4743	25.4841	26.4446	25.1689	27.0424	27.0475	29.2833	26.5714	27.2236	26.721	27.1112	26.2216	27.1063	27.3478	26.1798	27.4948	26.5476	27.0989	11	10	8	6	10	4	14	12	19	5	14	10	9	8	13	12	10	16	6	14
P08236-2;P08236;P08236-3	P08236-2;P08236;P08236-3	Beta-glucuronidase	GUSB	27.533	25.7742	28.5333	26.2506	25.6887	24.3045	25.508	25.4835	25.8524	25.8457	24.404	26.7138	27.4019	28.3393	27.8965	25.9526	27.3173	26.2543	26.023	25.8979	11	8	14	7	7	4	7	9	7	7	4	8	11	11	12	7	11	9	6	8
P08237;P08237-3;P08237-2	P08237;P08237-3;P08237-2	ATP-dependent 6-phosphofructokinase, muscle type	PFKM	27.5837	26.4135	25.8182	27.3125	26.3955	27.6598	26.4075	26.8092	25.8341	25.7534	27.5921	26.9757	25.9531	25.9371	26.9409	26.6498	26.1884	27.4997	26.746	26.4311	15	13	10	16	14	16	13	13	9	5	18	15	9	8	12	13	9	16	6	11
P08238;Q58FF7	P08238	Heat shock protein HSP 90-beta	HSP90AB1	32.4146	32.4212	32.2323	33.1684	32.7452	32.6671	32.6166	33.2912	32.8503	31.3337	32.3852	32.2303	31.9976	32.3901	32.3254	32.6907	32.5079	33.091	32.374	32.3453	37	37	36	38	37	37	39	39	38	30	35	35	35	37	34	39	37	39	31	36
P08240;P08240-2	P08240;P08240-2	Signal recognition particle receptor subunit alpha	SRPR	26.1946	26.3797	26.3001	26.2297	26.6364	25.1794	26.2236	26.4767	26.2295	24.6987	25.2682	26.1025	26.2995	25.5874	25.7721	26.4307	25.9683	26.0448	25.6966	26.7183	14	16	13	16	17	10	14	16	15	4	7	12	14	11	10	18	12	13	5	18
P08243-2;P08243;P08243-3	P08243-2;P08243;P08243-3	Asparagine synthetase [glutamine-hydrolyzing]	ASNS	22.4871	23.4563	NaN	23.57	23.8802	23.3861	24.5239	22.8244	NaN	NaN	NaN	NaN	22.8291	NaN	NaN	NaN	NaN	24.2409	NaN	22.7421	2	3	NaN	2	2	3	5	1	NaN	NaN	NaN	NaN	1	NaN	NaN	NaN	NaN	6	NaN	2
P08246	P08246	Neutrophil elastase	ELANE	26.2573	21.134	19.82	22.3428	24.5376	NaN	23.0131	25.3388	25.0877	28.311	21.8804	23.8397	22.1281	29.212	23.4259	28.4734	26.4417	25.6004	27.3211	25.3711	4	1	1	2	4	NaN	3	3	3	5	2	3	1	7	2	6	5	5	5	4
P08253;P08253-3;P08253-2	P08253;P08253-3;P08253-2	72 kDa type IV collagenase;PEX	MMP2	25.2042	26.9822	25.1443	NaN	25.1988	25.4066	26.1901	24.2901	23.7736	27.0943	27.6324	26.3163	25.8108	24.6356	26.5882	25.4634	26.0325	26.3228	NaN	27.1751	1	17	9	NaN	7	9	15	6	2	13	19	14	9	5	16	7	1	12	1	18
P09210;P08263	P09210;P08263	Glutathione S-transferase A2;Glutathione S-transferase A1;Glutathione S-transferase A1, N-terminally processed	GSTA2;GSTA1	24.7143	NaN	22.8236	24.207	26.5265	27.0613	NaN	NaN	25.5879	24.599	24.7772	25.6976	NaN	28.1052	24.9922	28.1658	NaN	24.0712	25.9094	24.4897	4	NaN	2	3	5	5	NaN	NaN	4	1	6	5	NaN	7	3	7	NaN	3	2	2
P08294	P08294	Extracellular superoxide dismutase [Cu-Zn]	SOD3	23.0358	24.0741	25.1479	24.5631	26.908	22.4035	24.444	23.265	29.7109	23.8141	21.2459	26.7948	26.0226	24.834	26.2416	23.0819	25.5322	NaN	26.691	24.5115	2	3	6	5	7	1	5	2	10	1	1	8	6	6	8	2	4	NaN	4	3
P08311	P08311	Cathepsin G	CTSG	27.2237	26.2283	NaN	23.1146	26.6614	23.6328	24.015	27.5686	27.632	28.1948	22.9274	26.4195	26.2443	30.1691	26.1166	28.6885	27.4256	26.902	27.8332	26.0673	8	6	NaN	2	7	2	3	8	9	7	1	6	6	12	6	10	7	7	9	5
P08397-2;P08397;P08397-4;P08397-3	P08397-2;P08397;P08397-4;P08397-3	Porphobilinogen deaminase	HMBS	23.5974	22.9007	23.9996	22.7582	23.2335	22.4712	22.8351	22.2552	23.8611	NaN	22.5067	22.7301	22.7729	22.6809	22.5661	23.1255	NaN	23.4963	23.4741	23.0055	3	2	3	3	2	3	2	2	3	NaN	1	2	1	3	1	2	1	3	2	3
P08473	P08473	Neprilysin	MME	NaN	NaN	17.6537	NaN	20.0938	19.4812	18.9009	18.2018	20.9762	19.8086	29.3793	24.7206	21.2937	19.6483	19.5354	21.0272	20.8729	NaN	NaN	20.2049	1	1	1	1	3	2	2	4	1	3	26	14	7	1	2	1	1	1	NaN	5
P08493;P08493-2	P08493;P08493-2	Matrix Gla protein	MGP	NaN	21.9747	24.3167	NaN	23.3066	NaN	NaN	NaN	NaN	NaN	NaN	23.4113	22.6062	NaN	NaN	NaN	NaN	NaN	NaN	21.9101	NaN	1	1	NaN	1	NaN	NaN	NaN	NaN	NaN	NaN	1	1	NaN	NaN	NaN	NaN	NaN	NaN	1
P08514;P08514-2;P08514-3	P08514;P08514-2;P08514-3	Integrin alpha-IIb;Integrin alpha-IIb heavy chain;Integrin alpha-IIb light chain, form 1;Integrin alpha-IIb light chain, form 2	ITGA2B	NaN	NaN	NaN	20.7686	NaN	20.9526	NaN	NaN	NaN	21.552	NaN	NaN	NaN	NaN	NaN	NaN	21.212	NaN	24.1457	NaN	NaN	NaN	NaN	1	NaN	1	NaN	NaN	NaN	1	NaN	NaN	NaN	NaN	NaN	NaN	2	NaN	6	NaN
P08519	P08519	Apolipoprotein(a)	LPA	21.3561	NaN	NaN	NaN	NaN	NaN	22.5805	NaN	NaN	25.975	NaN	NaN	NaN	22.0873	NaN	NaN	21.9315	23.2768	24.1554	22.7688	1	NaN	NaN	NaN	NaN	NaN	1	NaN	NaN	5	NaN	NaN	NaN	1	NaN	NaN	1	2	2	1
P08559;P08559-4;P08559-3;P08559-2;P29803	P08559;P08559-4;P08559-3;P08559-2	Pyruvate dehydrogenase E1 component subunit alpha, somatic form, mitochondrial	PDHA1	28.5687	27.3876	28.1658	27.9555	27.6594	27.7046	28.0083	27.8042	27.7227	26.3805	27.2308	26.9823	27.3343	26.8941	28.0244	27.4682	28.4912	27.3441	26.9028	27.5237	12	12	12	13	11	11	12	10	11	6	9	9	9	8	12	10	12	9	10	9
P08567	P08567	Pleckstrin	PLEK	23.3102	25.7535	NaN	24.3167	25.0966	23.6884	25.7333	25.5871	24.3453	25.4869	NaN	24.6134	26.0602	25.898	23.0782	26.2303	23.4527	24.89	26.7441	22.6454	1	8	NaN	1	5	2	7	8	5	4	NaN	4	8	6	2	7	1	3	8	1
P08571	P08571	Monocyte differentiation antigen CD14;Monocyte differentiation antigen CD14, urinary form;Monocyte differentiation antigen CD14, membrane-bound form	CD14	22.8578	25.8492	25.512	24.4881	26.917	24.7467	26.2343	26.6103	25.4758	26.7308	24.3444	26.4354	26.2866	26.3929	25.6659	25.9151	24.5415	24.793	26.5852	24.9732	1	5	5	4	6	6	6	7	5	7	4	6	6	6	5	6	4	5	6	4
P08572	P08572	Collagen alpha-2(IV) chain;Canstatin	COL4A2	26.4969	27.6188	26.6331	27.1219	28.1721	26.8955	27.4957	26.2894	29.532	29.4903	27.8365	28.414	27.8229	28.036	27.6958	27.6815	27.0373	27.9869	27.4217	28.0821	9	12	9	14	13	9	10	13	14	13	13	13	10	13	12	12	10	14	12	14
P08574	P08574	Cytochrome c1, heme protein, mitochondrial	CYC1	27.925	27.0333	28.6594	27.2248	27.3267	26.0735	29.5767	27.4594	26.9686	25.9232	26.9679	26.5432	26.7743	26.9111	27.2736	26.9487	28.0189	27.6584	26.5884	26.7798	6	6	7	6	8	4	8	6	5	4	7	6	6	7	6	7	6	8	7	7
P08575-2;P08575	P08575-2;P08575	Receptor-type tyrosine-protein phosphatase C	PTPRC	21.1058	27.7263	21.5165	25.3251	26.2264	NaN	27.2079	26.8254	22.342	26.6804	NaN	26.2811	27.3467	27.951	24.2479	26.5061	22.8339	21.5082	28.3059	NaN	2	27	2	13	13	NaN	22	23	5	13	NaN	21	22	27	6	19	2	2	23	NaN
P08579	P08579	U2 small nuclear ribonucleoprotein B	SNRPB2	24.8695	24.0526	24.3399	23.9417	23.9885	24.2219	23.9344	23.7598	23.7521	23.2273	23.6134	23.2549	23.7159	23.6073	23.9465	24.1533	23.9933	24.4919	24.0004	24.1139	3	3	3	5	4	4	4	2	3	1	4	2	1	3	4	4	2	4	2	3
P08581;P08581-2;P08581-3	P08581;P08581-2	Hepatocyte growth factor receptor	MET	20.8225	NaN	NaN	NaN	NaN	NaN	NaN	NaN	27.1109	NaN	NaN	NaN	NaN	NaN	NaN	NaN	NaN	NaN	NaN	NaN	1	NaN	NaN	NaN	NaN	NaN	NaN	NaN	16	NaN	NaN	NaN	NaN	NaN	NaN	NaN	NaN	NaN	NaN	NaN
P08582;P08582-2	P08582	Melanotransferrin	MFI2	22.3476	NaN	NaN	NaN	NaN	NaN	NaN	NaN	26.6946	NaN	NaN	22.306	NaN	24.4209	NaN	NaN	NaN	NaN	NaN	NaN	1	NaN	NaN	NaN	NaN	NaN	NaN	NaN	1	NaN	NaN	1	NaN	1	2	NaN	NaN	NaN	NaN	NaN
P08603;P08603-2	P08603	Complement factor H	CFH	29.5268	29.8056	30.1299	28.6322	29.7866	29.9905	29.3952	30.0141	29.4444	31.8992	29.8208	29.5809	29.3232	30.4085	29.4595	30.2369	30.0172	29.3175	30.4549	30.0052	43	43	46	36	42	44	40	44	40	45	44	42	42	42	40	46	40	42	39	43
P08621;P08621-2;P08621-3;P08621-4	P08621;P08621-2;P08621-3	U1 small nuclear ribonucleoprotein 70 kDa	SNRNP70	26.6449	26.7448	26.9111	27.1163	26.988	27.0801	26.6181	26.846	26.8099	25.4053	26.8579	26.8482	26.6407	26.6667	26.7488	27.161	27.1735	27.4002	26.8566	26.819	8	6	9	8	9	8	7	9	9	5	9	9	9	7	9	8	7	9	4	8
P08631-3;P08631-2;P08631-4;P08631	P08631-3;P08631-2;P08631-4;P08631	Tyrosine-protein kinase HCK	HCK	NaN	NaN	NaN	NaN	NaN	NaN	NaN	NaN	NaN	NaN	NaN	NaN	NaN	23.1926	NaN	NaN	NaN	NaN	NaN	NaN	NaN	NaN	NaN	NaN	NaN	NaN	NaN	NaN	1	NaN	NaN	NaN	1	1	NaN	NaN	NaN	NaN	NaN	NaN
P08637	P08637	Low affinity immunoglobulin gamma Fc region receptor III-A	FCGR3A	NaN	23.7801	NaN	NaN	22.8621	NaN	23.5737	23.5192	NaN	23.1753	NaN	22.6358	23.3283	NaN	NaN	23.2498	NaN	NaN	24.7471	NaN	NaN	1	NaN	NaN	1	NaN	3	1	NaN	1	NaN	1	2	NaN	NaN	1	NaN	NaN	3	NaN
P08648	P08648	Integrin alpha-5;Integrin alpha-5 heavy chain;Integrin alpha-5 light chain	ITGA5	23.1472	25.0186	NaN	23.1287	24.2457	23.3399	24.4189	23.8119	24.4286	27.3446	22.7659	23.7983	23.5212	21.3784	NaN	23.6497	NaN	NaN	24.7099	24.0914	2	5	NaN	3	2	1	6	3	3	10	2	3	2	3	NaN	1	NaN	NaN	2	2
P08651-5;P08651-6;P08651	P08651-5;P08651-6;P08651	Nuclear factor 1 C-type	NFIC	20.8156	NaN	21.0841	19.8997	NaN	NaN	NaN	NaN	NaN	NaN	NaN	21.6463	21.5416	20.4868	21.2808	21.8746	NaN	21.5302	NaN	NaN	1	NaN	1	1	NaN	NaN	NaN	NaN	NaN	NaN	NaN	1	1	1	1	1	NaN	1	NaN	NaN
P08651-4;P08651-3;P08651-2	P08651-4;P08651-3;P08651-2	Nuclear factor 1 C-type	NFIC	23.9831	24.1346	24.3712	24.6299	24.3588	24.7415	24.1697	23.526	NaN	NaN	24.9081	24.9209	24.4173	24.6792	24.5089	24.4187	24.5464	24.51	24.2766	24.3549	2	3	3	6	3	3	3	2	NaN	NaN	4	4	3	3	3	5	2	3	1	3
P08670;P41219;P41219-2	P08670	Vimentin	VIM	32.4228	34.1065	32.6844	32.3193	34.1775	35.2126	34.1113	33.5664	33.9512	34.1856	33.1105	34.9421	33.9417	33.6395	34.3234	33.8335	33.0161	33.6359	33.9936	33.1143	42	44	40	39	44	46	44	43	43	38	43	46	43	45	42	43	36	42	36	42
P08697;P08697-2;CON__P28800	P08697;P08697-2	Alpha-2-antiplasmin	SERPINF2	27.4101	26.7261	27.5904	26.1507	27.5444	27.3493	26.2784	27.942	27.3467	29.8749	27.3777	27.3148	27.3029	28.5675	27.3055	26.9135	27.8283	27.0895	27.8443	27.4371	10	10	11	8	11	11	8	10	10	10	11	10	10	11	10	9	8	10	9	11
P08708	P08708	40S ribosomal protein S17	RPS17	28.5055	28.3153	28.1816	28.7832	28.1121	28.2922	28.5627	28.3271	28.1111	27.2578	28.3192	28.2823	27.9713	27.8738	28.4199	28.6568	28.539	28.9704	28.2321	28.4855	5	6	5	6	5	6	4	5	5	4	5	6	5	5	5	5	5	4	4	5
P08727	P08727	Keratin, type I cytoskeletal 19	KRT19	NaN	26.6005	NaN	NaN	NaN	26.4464	NaN	NaN	NaN	NaN	29.1195	NaN	NaN	NaN	NaN	24.4691	22.3427	27.1228	NaN	NaN	NaN	1	NaN	NaN	NaN	1	NaN	NaN	NaN	NaN	1	NaN	NaN	NaN	NaN	1	1	1	NaN	NaN
P08754	P08754	Guanine nucleotide-binding protein G(k) subunit alpha	GNAI3	26.458	26.5509	26.5156	26.4887	26.4154	26.5185	26.3953	26.7412	26.6005	26.1525	25.8408	26.2602	26.4823	26.6711	26.4913	26.1717	26.8107	26.4255	26.7021	26.2058	8	8	7	7	8	8	8	8	8	7	4	5	6	8	7	7	5	7	6	8
P08758	P08758	Annexin A5	ANXA5	29.7376	31.3695	30.9622	29.9028	30.8619	30.8955	30.9	31.1741	30.8017	30.9987	31.9082	31.5185	31.6363	31.4335	31.3123	31.2704	30.4002	30.4368	31.3899	31.6602	18	20	20	19	20	20	20	20	19	18	21	20	21	20	19	20	16	20	18	20
P08833	P08833	Insulin-like growth factor-binding protein 1	IGFBP1	NaN	NaN	NaN	NaN	NaN	NaN	NaN	NaN	23.7231	NaN	NaN	NaN	NaN	NaN	NaN	NaN	NaN	NaN	NaN	NaN	NaN	NaN	NaN	NaN	NaN	NaN	NaN	NaN	2	NaN	NaN	NaN	1	NaN	NaN	NaN	1	NaN	1	NaN
P08842	P08842	Steryl-sulfatase	STS	22.4747	NaN	NaN	NaN	NaN	20.5537	NaN	NaN	NaN	NaN	NaN	NaN	NaN	NaN	NaN	NaN	NaN	NaN	NaN	NaN	4	NaN	NaN	NaN	NaN	1	NaN	NaN	NaN	NaN	NaN	NaN	NaN	NaN	NaN	NaN	NaN	NaN	NaN	NaN
P08865	P08865	40S ribosomal protein SA	RPSA	29.8624	29.934	29.9087	30.1077	29.6609	29.5881	29.8513	29.6964	29.6975	29.2862	29.7088	29.8188	29.603	29.438	29.942	29.969	29.8189	30.0672	29.6013	29.9266	15	15	15	12	14	13	13	15	14	10	15	15	15	15	15	15	11	15	11	15
P08962-3;P08962-2;P08962	P08962-3;P08962-2;P08962	CD63 antigen	CD63	26.2024	27.0333	28.6606	28.706	26.3963	25.1764	26.1051	27.0238	27.2313	22.9655	26.7589	26.9093	27.5854	27.7369	27.6529	26.5878	26.685	26.8379	24.0782	28.0198	1	1	1	1	1	1	1	1	1	1	1	1	1	1	2	1	1	1	1	1
P09001	P09001	39S ribosomal protein L3, mitochondrial	MRPL3	24.213	NaN	23.0523	23.3752	23.4841	23.5274	23.8623	23.5854	24.3153	NaN	23.1666	22.9214	NaN	22.3316	23.0881	23.3551	23.961	23.5181	NaN	23.268	3	1	3	2	2	2	2	2	2	NaN	2	2	NaN	1	3	3	3	3	NaN	3
P09012	P09012	U1 small nuclear ribonucleoprotein A	SNRPA	27.0612	26.8479	27.1243	27.1108	27.2425	27.1518	26.6359	27.0339	27.1687	25.1558	27.0586	27.1401	26.5845	26.886	26.752	27.3112	27.3999	27.4347	26.8151	26.8898	7	6	8	7	7	7	7	7	7	3	7	7	6	5	7	7	7	7	6	6
P09086-4;Q9UKI9-3;Q9UKI9;Q9UKI9-2;P09086-3;P09086-2;P09086;P09086-5;P14859-4;P14859-5;P14859-3;P14859;P14859-2;P14859-6	P09086-4;Q9UKI9-3;Q9UKI9;Q9UKI9-2;P09086-3;P09086-2;P09086;P09086-5;P14859-4;P14859-5;P14859-3;P14859;P14859-2;P14859-6	POU domain, class 2, transcription factor 2;POU domain, class 2, transcription factor 3;POU domain, class 2, transcription factor 1	POU2F2;POU2F3;POU2F1	NaN	NaN	20.9559	21.2256	NaN	NaN	NaN	NaN	NaN	NaN	NaN	NaN	NaN	NaN	NaN	NaN	NaN	NaN	NaN	NaN	NaN	NaN	1	1	NaN	NaN	NaN	NaN	NaN	NaN	NaN	NaN	NaN	NaN	NaN	NaN	NaN	NaN	NaN	NaN
P09104;P09104-2;P13929-3	P09104;P09104-2	Gamma-enolase	ENO2	25.1217	26.6126	27.4354	26.8252	25.6287	23.0075	27.2228	27.8679	22.4754	26.8785	27.2913	26.9732	25.7375	25.8596	27.3836	26.2891	25.1599	27.9138	26.4027	25.3132	2	12	13	12	9	2	9	12	2	6	10	10	12	7	10	9	4	13	8	7
P09110;P09110-2	P09110;P09110-2	3-ketoacyl-CoA thiolase, peroxisomal	ACAA1	27.589	26.3615	29.555	28.163	26.865	25.5011	26.3781	26.4794	27.714	24.8452	26.7941	26.4956	27.0821	26.8422	25.8757	26.5792	26.0158	26.5039	26.8466	27.3008	12	8	15	13	10	8	9	9	12	4	9	8	11	8	8	9	6	9	7	11
P09132;P09132-2	P09132;P09132-2	Signal recognition particle 19 kDa protein	SRP19	23.9054	23.8127	22.3231	23.4392	23.6012	23.2081	23.9831	23.6063	22.8799	NaN	23.7453	22.943	23.6851	23.3836	23.2065	23.5182	22.5216	23.6058	22.4367	23.4079	2	3	1	3	3	1	3	3	2	NaN	2	3	3	2	2	3	1	2	1	2
P09211	P09211	Glutathione S-transferase P	GSTP1	31.9435	31.5312	32.3539	31.0879	31.7192	31.7165	31.126	31.248	31.5997	30.5874	32.4221	31.9317	31.2006	31.179	32.1437	31.0813	32.1464	31.2716	31.3731	31.2253	14	14	14	14	13	13	14	14	14	10	14	14	14	13	13	14	12	14	13	14
P09228	P09228	Cystatin-SA	CST2	NaN	NaN	NaN	NaN	NaN	NaN	NaN	NaN	NaN	NaN	23.5507	NaN	NaN	NaN	NaN	NaN	NaN	NaN	NaN	NaN	NaN	NaN	NaN	NaN	NaN	NaN	NaN	NaN	NaN	NaN	2	NaN	NaN	NaN	NaN	NaN	NaN	NaN	NaN	NaN
P09234	P09234	U1 small nuclear ribonucleoprotein C	SNRPC	26.117	26.2895	26.5145	26.1726	26.1863	26.7868	26.7141	26.3019	26.5223	24.5651	26.3329	26.3767	26.1818	26.0566	26.084	26.7675	26.4999	26.8459	26.19	26.1786	2	2	2	2	2	2	1	2	2	1	2	2	2	2	2	2	2	2	2	2
P09237	P09237	Matrilysin	MMP7	26.1965	NaN	21.4193	23.4891	NaN	NaN	NaN	NaN	22.7916	NaN	23.612	24.3966	26.0969	NaN	25.9376	25.6353	23.5366	23.8016	NaN	27.2608	7	NaN	1	5	NaN	NaN	NaN	NaN	2	NaN	3	6	7	NaN	8	6	2	4	2	8
P09238	P09238	Stromelysin-2	MMP10	23.2825	22.6107	24.3179	22.9344	23.6107	23.2555	22.8743	23.342	23.4798	25.0081	22.9563	24.082	23.0159	25.3598	23.7822	22.9829	24.8435	24.1968	20.4726	23.9921	1	1	2	1	1	1	1	1	4	1	1	1	1	2	1	1	1	1	1	1
P09326	P09326	CD48 antigen	CD48	NaN	NaN	NaN	NaN	NaN	NaN	NaN	NaN	NaN	NaN	NaN	NaN	NaN	NaN	NaN	NaN	NaN	NaN	22.4714	NaN	NaN	1	NaN	NaN	NaN	NaN	NaN	NaN	NaN	NaN	NaN	NaN	1	NaN	NaN	NaN	NaN	NaN	1	NaN
P09327;P09327-2	P09327	Villin-1	VIL1	28.8131	16.6828	NaN	17.3773	NaN	NaN	17.3895	16.6502	NaN	18.855	NaN	NaN	NaN	18.9385	19.221	NaN	22.5335	16.278	18.5112	NaN	27	1	NaN	1	NaN	NaN	1	1	NaN	1	NaN	NaN	NaN	2	1	NaN	6	1	1	NaN
P09382	P09382	Galectin-1	LGALS1	28.5826	31.8375	29.9314	30.9108	31.1287	31.2651	31.8222	31.2426	31.5337	31.5231	30.0482	30.9371	30.443	29.8158	30.5194	30.4875	28.7419	30.3855	30.3607	30.0003	9	9	9	9	9	9	9	9	9	9	9	9	9	9	9	9	8	9	9	9
P09417;P09417-2	P09417;P09417-2	Dihydropteridine reductase	QDPR	25.8429	26.2279	27.9843	26.941	26.1037	27.1822	26.3062	25.895	25.7298	25.4317	26.8824	26.4562	26.8965	26.5935	26.5203	26.3621	26.5783	26.3395	26.1544	25.9293	7	6	8	9	6	9	7	5	4	2	7	6	7	7	5	7	5	5	7	6
P09429;B2RPK0	P09429;B2RPK0	High mobility group protein B1;Putative high mobility group protein B1-like 1	HMGB1;HMGB1P1	29.5763	30.0821	30.5207	30.1579	29.9024	30.4286	30.2318	29.2978	29.8185	28.7636	30.5038	30.2028	29.9639	30.0509	30.2825	29.9525	30.0999	30.0398	29.843	29.8521	9	8	10	10	9	10	9	9	10	8	9	9	10	10	9	9	9	8	8	9
P09455;P09455-2;P09455-3	P09455;P09455-2;P09455-3	Retinol-binding protein 1	RBP1	26.1197	27.7856	27.8504	29.6428	29.0859	30.7272	26.8906	28.0096	28.2172	25.5812	28.7825	28.325	29.2762	28.237	27.6423	29.2608	26.6147	28.6061	28.5323	27.6937	7	10	10	10	10	10	8	10	10	5	9	9	10	10	10	10	8	10	9	10
P09466-2;P09466;P09466-3	P09466-2;P09466;P09466-3	Glycodelin	PAEP	NaN	NaN	NaN	NaN	NaN	NaN	NaN	22.762	NaN	NaN	NaN	NaN	NaN	NaN	NaN	NaN	NaN	NaN	NaN	22.9728	NaN	NaN	NaN	NaN	NaN	NaN	NaN	2	NaN	NaN	NaN	NaN	NaN	NaN	NaN	NaN	NaN	NaN	NaN	2
P09467	P09467	Fructose-1,6-bisphosphatase 1	FBP1	27.0846	26.8703	26.091	25.1892	25.8617	NaN	25.3493	26.0705	24.9838	26.1246	24.4	27.2636	29.2564	26.5306	26.7894	26.6637	26.5356	25.7303	26.4132	25.8639	9	9	6	5	5	NaN	3	8	6	6	4	8	13	10	10	9	4	6	7	5
P09471-2;P09471	P09471-2;P09471	Guanine nucleotide-binding protein G(o) subunit alpha	GNAO1	NaN	22.4419	NaN	NaN	NaN	NaN	NaN	NaN	NaN	NaN	NaN	NaN	NaN	NaN	22.8912	NaN	NaN	NaN	NaN	NaN	NaN	1	NaN	NaN	NaN	NaN	NaN	NaN	NaN	NaN	NaN	NaN	NaN	NaN	1	NaN	NaN	NaN	NaN	NaN
P09486	P09486	SPARC	SPARC	24.7574	28.7762	24.9918	25.1753	26.2859	26.6938	27.1217	26.6185	26.0467	28.0653	26.234	26.0381	25.3149	26.2267	26.1257	25.9665	26.0012	26.1944	26.2577	27.1267	3	11	6	5	9	9	9	8	7	9	8	6	5	7	7	8	7	6	5	10
P09488;P09488-2	P09488;P09488-2	Glutathione S-transferase Mu 1	GSTM1	26.6683	26.3379	24.3953	NaN	25.4664	27.7404	25.0921	24.6426	25.5211	23.7466	27.0017	23.3834	23.0985	NaN	27.1214	26.7874	21.8938	NaN	NaN	27.1423	6	6	2	NaN	4	8	4	4	6	2	7	1	1	NaN	8	9	1	NaN	NaN	8
P09493-2	P09493-2	Tropomyosin alpha-1 chain	TPM1	23.0786	22.4434	24.667	23.3488	23.3088	22.7916	23.9498	23.4322	23.4543	NaN	24.0548	23.7221	23.8161	24.2173	23.4544	24.3891	NaN	23.8966	23.4411	23.9661	1	1	1	1	1	1	1	1	1	NaN	1	1	1	1	1	1	NaN	1	1	1
P09493-3;P09493-4;P09493-10	P09493-3;P09493-4;P09493-10	Tropomyosin alpha-1 chain	TPM1	27.5419	31.3721	28.8214	29.2214	30.4588	31.3355	30.6162	28.9106	29.8656	30.6521	29.4731	30.9013	30.319	28.2418	29.1052	29.2241	28.002	28.7239	30.1855	30.7664	13	17	14	11	13	16	16	14	15	14	13	16	17	11	13	13	5	12	14	18
P09493-5	P09493-5	Tropomyosin alpha-1 chain	TPM1	23.3206	23.2753	24.4574	23.2802	23.1291	22.7007	24.1479	23.9546	23.6563	21.1076	23.7431	24.059	23.4178	23.8287	24.1638	23.8232	23.2512	23.7283	23.1145	24.0618	1	1	1	1	1	1	1	1	1	1	1	1	1	1	1	1	1	1	1	1
P09493-8	P09493-8	Tropomyosin alpha-1 chain	TPM1	23.8014	27.2743	20.7073	22.5482	24.2399	25.4884	24.7051	22.7068	27.3155	26.1444	20.7127	28.0991	27.8003	22.3276	24.4423	23.4167	NaN	23.2391	24.8456	28.1475	1	3	1	3	4	3	4	1	4	4	1	4	4	3	2	3	NaN	2	3	4
P09493-9;P09493	P09493-9;P09493	Tropomyosin alpha-1 chain	TPM1	NaN	25.5684	21.1885	21.8131	24.1497	23.9732	24.6437	21.5577	25.3016	24.9912	22.2205	25.7429	25.9695	21.2086	23.1657	NaN	NaN	22.2361	23.3919	25.8384	NaN	2	1	2	2	2	2	1	2	1	1	1	2	1	1	NaN	NaN	1	1	2
P09496-2;P09496-4;P09496-3;P09496;P09496-5	P09496-2;P09496-4;P09496-3;P09496;P09496-5	Clathrin light chain A	CLTA	27.2359	27.0528	26.8067	27.2695	27.3956	27.0308	26.8272	28.1962	27.559	26.0457	27.4407	27.4675	27.3287	27.2903	27.4392	27.7702	27.1496	27.4057	27.2506	27.5273	4	4	4	5	4	4	4	4	4	3	4	5	5	5	5	4	5	4	4	5
P09497-2;P09497	P09497-2;P09497	Clathrin light chain B	CLTB	25.9432	25.27	25.864	24.7916	24.7762	24.8807	25.0931	25.2245	24.5508	23.3851	25.1848	25.1744	25.2839	25.1767	24.8243	25.4325	24.1418	25.0983	25.189	25.6771	6	5	7	4	5	5	5	4	3	1	4	5	6	3	5	6	2	5	3	6
P09525	P09525	Annexin A4	ANXA4	32.2443	29.3689	29.4212	29.3752	31.3448	28.5003	28.8182	28.8763	31.3822	28.2829	30.6875	30.4568	30.1021	29.5464	29.1327	29.703	30.975	29.1471	29.6822	29.5805	25	19	19	16	22	18	19	16	23	15	22	21	22	17	16	20	21	16	17	19
P09525-2	P09525-2	Annexin A4	ANXA4	27.8568	22.8023	22.4334	23.189	25.1548	23.335	22.1896	22.3498	26.4225	22.3727	25.9632	24.7012	24.3927	23.7372	23.6351	23.8858	26.5187	23.4681	25.6221	23.9311	1	1	1	1	1	1	1	1	1	1	1	1	1	1	1	1	1	1	1	1
P09529	P09529	Inhibin beta B chain	INHBB	NaN	NaN	NaN	NaN	NaN	NaN	NaN	NaN	NaN	NaN	23.4211	NaN	NaN	NaN	NaN	NaN	NaN	NaN	NaN	NaN	NaN	NaN	NaN	NaN	NaN	NaN	NaN	NaN	NaN	NaN	1	NaN	NaN	NaN	NaN	NaN	NaN	NaN	NaN	NaN
P09543-2;P09543	P09543-2;P09543	2,3-cyclic-nucleotide 3-phosphodiesterase	CNP	26.2935	26.8317	26.6393	25.8352	26.9943	27.067	26.5239	27.2681	27.0618	26.3033	26.3101	26.4463	26.9998	27.1855	27.7334	27.3773	26.6513	26.5007	27.1746	26.6009	13	14	14	12	14	14	10	15	14	6	14	14	14	14	14	16	10	14	9	12
P09601	P09601	Heme oxygenase 1	HMOX1	22.4604	24.5743	21.8562	22.0854	25.3086	24.6883	22.2762	23.8942	24.9622	24.8506	NaN	23.842	23.5711	24.4385	23.1291	23.8963	NaN	22.9879	25.3089	22.491	1	5	1	1	6	3	3	4	6	3	NaN	5	2	1	2	2	NaN	2	5	1
P09603-3;P09603-2;P09603	P09603-3;P09603-2;P09603	Macrophage colony-stimulating factor 1;Processed macrophage colony-stimulating factor 1	CSF1	NaN	NaN	22.873	NaN	21.8304	NaN	NaN	21.4235	NaN	NaN	NaN	NaN	NaN	NaN	NaN	NaN	NaN	NaN	NaN	NaN	NaN	NaN	3	NaN	2	NaN	NaN	1	NaN	NaN	NaN	NaN	NaN	NaN	NaN	NaN	NaN	NaN	NaN	NaN
P09619;P09619-2	P09619	Platelet-derived growth factor receptor beta	PDGFRB	NaN	24.1653	NaN	NaN	22.8857	23.598	NaN	22.9666	NaN	23.3709	23.159	24.195	23.2204	NaN	NaN	23.1014	NaN	NaN	NaN	23.2496	NaN	3	NaN	NaN	1	4	NaN	2	NaN	1	3	5	1	NaN	NaN	1	NaN	NaN	NaN	2
P09622;P09622-2;P09622-3	P09622;P09622-2;P09622-3	Dihydrolipoyl dehydrogenase, mitochondrial	DLD	29.1353	27.4058	28.3626	28.4785	27.6134	27.8464	27.4094	27.0814	27.8862	26.2773	27.1996	28.0855	27.7588	27.7167	27.6613	27.7808	28.9143	27.6686	27.4948	28.3838	15	13	13	11	10	10	11	8	10	6	9	10	11	12	12	9	13	11	7	11
P09651-3;P09651-2;P09651;Q32P51	P09651-3;P09651-2;P09651;Q32P51	Heterogeneous nuclear ribonucleoprotein A1;Heterogeneous nuclear ribonucleoprotein A1, N-terminally processed;Heterogeneous nuclear ribonucleoprotein A1-like 2	HNRNPA1;HNRNPA1L2	30.2619	30.4497	30.0946	30.328	30.5505	30.2932	30.2613	30.5917	30.3135	29.0495	30.0359	30.4411	29.8585	30.2289	30.1057	30.3775	30.8078	30.7699	30.2076	30.3496	14	14	14	14	14	14	14	14	14	10	13	14	13	14	14	14	13	14	12	13
P09661	P09661	U2 small nuclear ribonucleoprotein A	SNRPA1	26.0697	25.7569	25.9622	26.7737	26.0948	26.3762	26.278	26.0592	26.1677	23.7238	25.7869	25.8856	25.5433	25.808	25.6203	26.1418	26.2138	26.268	25.602	25.9477	7	7	8	6	6	9	7	6	7	3	5	6	5	6	6	9	7	7	7	8
P09668	P09668	Pro-cathepsin H;Cathepsin H mini chain;Cathepsin H;Cathepsin H heavy chain;Cathepsin H light chain	CTSH	24.7418	24.6775	28.5091	24.7193	23.0347	NaN	24.5946	23.1489	25.0757	21.9335	NaN	27.3623	28.5128	25.6334	21.379	25.3815	21.9484	24.3836	24.2072	25.5394	3	2	7	3	1	NaN	4	2	2	1	1	6	9	5	2	5	1	2	1	5
P09669	P09669	Cytochrome c oxidase subunit 6C	COX6C	27.5621	26.3807	26.1279	26.443	25.5182	25.5165	26.2346	26.2901	25.4096	24.5848	25.9651	26.1498	25.8086	26.0566	26.8738	26.1893	26.8404	26.5813	25.9248	26.8544	2	2	2	2	2	2	2	3	1	1	3	2	3	2	2	2	3	2	3	2
P09758	P09758	Tumor-associated calcium signal transducer 2	TACSTD2	26.6784	NaN	25.9193	27.3467	28.5693	24.7951	NaN	25.9694	NaN	NaN	26.8566	25.9228	26.418	24.0408	28.4	26.2548	25.6568	26.9038	25.171	26.9535	8	NaN	6	8	9	4	NaN	7	NaN	NaN	6	6	6	2	9	8	5	7	4	8
P09769	P09769	Tyrosine-protein kinase Fgr	FGR	NaN	NaN	NaN	NaN	20.174	NaN	NaN	19.4444	NaN	NaN	NaN	NaN	NaN	23.2623	NaN	NaN	NaN	NaN	19.7976	NaN	NaN	NaN	NaN	NaN	1	NaN	NaN	1	NaN	NaN	NaN	NaN	NaN	5	NaN	NaN	NaN	NaN	1	NaN
P09871;P48740-3;P48740-4;P48740;P48740-2	P09871	Complement C1s subcomponent;Complement C1s subcomponent heavy chain;Complement C1s subcomponent light chain	C1S	25.1772	27.277	25.8485	26.3076	26.344	26.1532	26.5437	26.7017	26.2351	28.7083	NaN	25.9013	25.9087	26.5504	26.4333	25.2302	26.1192	25.5874	27.0213	25.4749	6	13	9	11	11	9	11	11	9	12	NaN	10	7	9	9	6	9	9	9	7
P09874	P09874	Poly [ADP-ribose] polymerase 1	PARP1	29.8515	29.4989	28.7921	30.503	29.3484	29.7391	29.0633	29.6277	29.573	27.0152	28.5553	28.722	28.4083	28.6443	29.9563	30.0354	30.5236	29.5107	29.4901	29.4677	40	33	35	44	37	37	35	38	37	10	30	33	34	30	37	43	38	38	27	36
P09913	P09913	Interferon-induced protein with tetratricopeptide repeats 2	IFIT2	NaN	NaN	NaN	26.1687	26.3689	21.868	24.6017	25.5777	NaN	NaN	NaN	NaN	NaN	NaN	NaN	NaN	NaN	NaN	23.9751	NaN	NaN	NaN	NaN	11	9	1	4	10	NaN	NaN	NaN	NaN	NaN	NaN	NaN	NaN	NaN	NaN	1	NaN
P09914;P09914-2;Q5T764	P09914;P09914-2	Interferon-induced protein with tetratricopeptide repeats 1	IFIT1	NaN	23.7818	21.2587	27.7214	27.7853	24.566	26.2934	28.2088	18.8026	20.8428	NaN	21.8108	23.7848	20.185	23.9538	22.7639	NaN	NaN	25.6841	NaN	NaN	8	4	13	14	9	11	13	1	2	NaN	4	8	2	4	5	NaN	NaN	5	NaN
P09917;P09917-2;P09917-3;P09917-5;P09917-4	P09917;P09917-2;P09917-3;P09917-5;P09917-4	Arachidonate 5-lipoxygenase	ALOX5	22.7705	25.5715	NaN	24.072	25.1742	NaN	27.6798	25.9947	28.0955	25.1334	24.5417	25.4004	26.6425	26.2008	NaN	23.5586	23.3331	22.4309	25.1504	22.1745	3	8	NaN	3	9	NaN	19	9	19	7	6	6	16	15	NaN	7	1	2	9	1
P09936	P09936	Ubiquitin carboxyl-terminal hydrolase isozyme L1	UCHL1	NaN	27.6532	25.0307	30.2699	28.4932	28.1169	28.1585	29.1222	26.0299	27.3898	24.8773	26.7594	26.0363	25.012	25.5009	25.2686	24.7463	26.3526	27.3611	26.8157	NaN	9	5	9	9	9	9	9	7	7	4	8	8	5	6	6	4	9	6	9
P09960;P09960-4;P09960-2;P09960-3	P09960;P09960-4;P09960-2;P09960-3	Leukotriene A-4 hydrolase	LTA4H	29.4207	28.8065	28.7881	28.478	29.0356	28.9397	29.9341	28.8965	28.6429	28.138	29.3844	29.708	29.4599	29.4351	28.3925	29.0933	29.6423	29.3245	28.8969	28.8396	26	24	27	25	27	25	26	26	24	17	28	28	27	26	23	28	25	28	22	25
P09972	P09972	Fructose-bisphosphate aldolase C	ALDOC	27.4145	27.2452	27.7871	27.0746	27.2186	27.2362	27.7521	28.0277	27.0504	27.2697	27.9668	26.0978	25.2202	27.1859	25.0269	27.0285	27.1847	27.2389	28.0018	26.9908	8	3	4	1	7	2	8	7	4	2	10	2	2	7	3	1	6	2	2	5
P0C0L4;P0C0L4-2;CON__ENSEMBL:ENSBTAP00000007350	P0C0L4;P0C0L4-2	Complement C4-A;Complement C4 beta chain;Complement C4-A alpha chain;C4a anaphylatoxin;C4b-A;C4d-A;Complement C4 gamma chain	C4A	31.0541	30.1999	30.9642	30.2661	31.2008	31.6831	30.1428	30.6516	30.8243	32.6332	30.9927	30.7554	32.0424	31.5186	30.9002	30.6769	31.9133	30.5418	32.5241	31.1493	64	56	68	59	66	67	55	62	57	72	63	63	70	70	66	67	63	61	68	63
P0C0L5	P0C0L5	Complement C4-B;Complement C4 beta chain;Complement C4-B alpha chain;C4a anaphylatoxin;C4b-B;C4d-B;Complement C4 gamma chain	C4B	26.7652	25.8031	26.8427	26.311	27.0498	27.8541	25.7745	26.3121	26.7877	28.8709	26.9086	26.8902	27.1186	27.638	27.2064	25.9875	27.4658	26.0566	28.0652	27.5007	3	3	4	3	3	3	3	3	3	2	3	3	3	4	4	2	4	3	2	4
Q71UI9;P0C0S5;Q71UI9-4;Q71UI9-2;Q71UI9-3	Q71UI9;P0C0S5;Q71UI9-4;Q71UI9-2;Q71UI9-3	Histone H2A.V;Histone H2A.Z	H2AFV;H2AFZ	26.7601	27.9042	27.6651	27.9168	27.8429	27.7457	28.0099	27.8441	26.9352	26.0403	28.0904	27.8771	27.4682	28.0053	27.7673	27.6587	28.12	28.1594	27.1917	27.4474	3	3	3	3	3	3	3	3	2	3	3	3	3	3	3	3	3	3	2	3
Q99878;Q96KK5;Q9BTM1;Q93077;P0C0S8;Q7L7L0;P20671;P04908;Q9BTM1-2;Q71UI9-5	Q99878;Q96KK5;Q9BTM1;Q93077;P0C0S8;Q7L7L0;P20671;P04908;Q9BTM1-2	Histone H2A type 1-J;Histone H2A type 1-H;Histone H2A.J;Histone H2A type 1-C;Histone H2A type 1;Histone H2A type 3;Histone H2A type 1-D;Histone H2A type 1-B/E	HIST1H2AJ;HIST1H2AH;H2AFJ;HIST1H2AC;HIST1H2AG;HIST3H2A;HIST1H2AD;HIST1H2AB	31.798	32.4579	32.2802	32.7081	32.2079	32.5342	32.5627	32.2393	32.1122	31.5837	32.3477	32.667	32.2521	32.5828	32.4158	32.0565	32.5283	32.3185	31.878	32.182	6	4	6	6	5	5	6	6	6	3	6	6	5	6	6	6	5	5	5	5
P0C870;P0C869-8;P0C869-7;P0C869-6	P0C870;P0C869-8;P0C869-7;P0C869-6	JmjC domain-containing protein 7	JMJD7	22.1754	NaN	23.1971	NaN	NaN	NaN	NaN	21.2975	21.6952	NaN	21.7421	NaN	22.6112	NaN	22.2449	21.9075	22.3049	22.5825	NaN	NaN	1	NaN	4	NaN	NaN	NaN	NaN	1	1	NaN	2	NaN	2	NaN	2	1	2	3	NaN	NaN
P0CG30;P0CG29	P0CG30;P0CG29	Glutathione S-transferase theta-2B;Glutathione S-transferase theta-2	GSTT2B;GSTT2	NaN	22.9527	22.6481	23.5723	NaN	NaN	23.1599	22.7014	NaN	NaN	23.2829	23.6084	24.0449	NaN	23.4228	NaN	NaN	NaN	28.2526	NaN	NaN	3	2	2	NaN	NaN	1	2	NaN	NaN	4	4	3	NaN	4	NaN	NaN	NaN	1	NaN
P0DI82;P0DI81;P0DI81-3	P0DI82;P0DI81;P0DI81-3	Trafficking protein particle complex subunit 2B;Trafficking protein particle complex subunit 2	TRAPPC2B;TRAPPC2	NaN	NaN	NaN	NaN	NaN	NaN	NaN	NaN	NaN	NaN	NaN	NaN	NaN	22.4633	NaN	22.0077	NaN	21.7311	NaN	NaN	NaN	NaN	NaN	NaN	NaN	NaN	1	NaN	NaN	NaN	NaN	NaN	NaN	1	NaN	1	NaN	1	NaN	NaN
P0DJD0;P0DJD1	P0DJD0;P0DJD1	RANBP2-like and GRIP domain-containing protein 1;RANBP2-like and GRIP domain-containing protein 2	RGPD1;RGPD2	19.1288	NaN	19.2746	21.4898	20.2627	NaN	NaN	NaN	20.4361	NaN	NaN	NaN	19.6312	19.7051	NaN	21.7634	20.8776	NaN	20.8516	19.4402	1	NaN	1	1	1	NaN	NaN	NaN	1	NaN	NaN	NaN	1	1	NaN	1	2	1	2	1
P0DJI8	P0DJI8	Serum amyloid A-1 protein;Amyloid protein A;Serum amyloid protein A(2-104);Serum amyloid protein A(3-104);Serum amyloid protein A(2-103);Serum amyloid protein A(2-102);Serum amyloid protein A(4-101)	SAA1	23.3464	20.6011	19.3226	NaN	20.081	NaN	28.44	21.0801	NaN	20.5159	NaN	NaN	NaN	23.5735	NaN	20.5353	29.303	NaN	NaN	21.9417	2	1	1	NaN	1	NaN	4	1	NaN	1	NaN	NaN	NaN	3	NaN	2	5	NaN	NaN	2
P0DJI9;P0DJI9-2	P0DJI9	Serum amyloid A-2 protein	SAA2	25.1488	NaN	NaN	NaN	NaN	NaN	26.4743	NaN	NaN	NaN	NaN	NaN	NaN	24.393	NaN	24.452	26.3182	NaN	NaN	23.7921	1	NaN	NaN	NaN	NaN	NaN	2	NaN	NaN	NaN	NaN	NaN	NaN	1	NaN	1	2	NaN	NaN	1
P0DMN0;P0DMM9;P0DMM9-3;P0DMM9-2;P50225-2	P0DMN0;P0DMM9;P0DMM9-3;P0DMM9-2	Sulfotransferase 1A4;Sulfotransferase 1A3	SULT1A4;SULT1A3	27.6476	22.2209	23.1747	25.149	25.1887	22.7545	21.2328	23.9414	25.1474	NaN	24.9266	22.3514	23.4328	24.1842	23.4488	22.0664	23.7886	20.5421	24.8001	NaN	9	3	2	6	5	1	1	5	6	NaN	6	2	1	3	4	1	2	1	5	NaN
P0DMV9;P0DMV8;P0DMV8-2	P0DMV9;P0DMV8;P0DMV8-2	Heat shock 70 kDa protein 1B;Heat shock 70 kDa protein 1A	HSPA1B;HSPA1A	31.3517	30.9749	31.1069	31.5951	30.8825	31.2836	31.6577	31.702	29.6682	30.2224	31.7751	30.5647	31.1441	31.2417	31.6791	30.4111	31.6492	30.8542	31.4864	30.467	32	32	30	32	31	31	32	33	26	20	30	29	30	34	31	30	27	31	30	30
P0DN76;Q01081;Q01081-2;Q01081-4;Q8WU68-3;Q8WU68;Q01081-3;Q8WU68-2	P0DN76;Q01081;Q01081-2;Q01081-4	Splicing factor U2AF 35 kDa subunit	U2AF1	26.8767	26.704	26.7439	27.4027	27.0299	27.1925	26.4152	27.189	27.0891	25.8199	26.6903	26.8103	26.6288	26.8385	26.5607	26.9148	27.1248	27.6857	26.3055	27.0186	8	8	8	8	7	7	7	7	8	2	8	7	7	7	6	7	6	7	6	6
P0DN79;P35520;P35520-2	P0DN79;P35520;P35520-2	Cystathionine beta-synthase	CBS	NaN	NaN	22.192	24.9368	26.0224	NaN	24.6766	26.6925	NaN	NaN	NaN	NaN	NaN	NaN	NaN	NaN	NaN	NaN	NaN	NaN	NaN	NaN	1	6	5	NaN	5	7	NaN	NaN	NaN	NaN	NaN	NaN	NaN	NaN	NaN	NaN	NaN	NaN
P0DOY2;P0DOY3;P0CF74;A0M8Q6	P0DOY2;P0DOY3;P0CF74	Ig lambda-6 chain C region	IGLC6	26.7882	27.9241	26.8466	25.9982	26.8216	27.3513	28.5711	26.8693	27.619	29.1566	26.9978	26.7591	27.488	27.5438	26.1827	26.7052	27.4525	25.5972	27.3976	27.0978	2	2	2	2	2	2	2	2	2	2	2	2	2	2	2	2	2	2	2	2
P0DP01	P0DP01			NaN	NaN	NaN	NaN	NaN	NaN	25.0959	NaN	NaN	NaN	23.1121	NaN	NaN	NaN	NaN	NaN	NaN	NaN	NaN	NaN	NaN	NaN	NaN	NaN	NaN	NaN	2	NaN	NaN	NaN	2	NaN	NaN	NaN	NaN	NaN	NaN	NaN	NaN	NaN
P0DP02	P0DP02			26.2934	27.8899	27.2933	25.8435	26.0907	26.7612	27.2752	26.8351	27.1733	28.6894	27.1064	26.7155	27.4956	27.6995	26.4332	26.6647	26.4487	25.3675	27.9162	27.3193	1	1	1	1	1	1	1	1	1	2	1	1	1	1	1	1	1	1	1	1
P0DP25;P0DP24;P0DP23;P02585	P0DP25;P0DP24;P0DP23			26.6828	26.8904	27.3805	27.4859	26.9871	27.4689	26.9134	27.0436	26.7828	25.4947	27.1092	26.9467	26.8062	27.3363	26.7666	26.5325	25.5548	26.7292	26.8833	26.1954	7	6	8	8	8	8	7	7	7	4	7	7	7	7	8	6	5	7	7	7
P10109	P10109	Adrenodoxin, mitochondrial	FDX1	24.5371	23.4736	25.013	24.7808	24.6038	24.3097	23.6852	23.7896	25.2826	23.9045	24.79	23.9253	25.1902	24.9366	24.9557	24.7306	23.0002	24.4367	24.0341	24.2095	3	3	5	3	3	3	3	3	3	1	4	3	4	3	3	4	2	3	4	3
P10153	P10153	Non-secretory ribonuclease	RNASE2	24.2142	NaN	NaN	NaN	NaN	NaN	NaN	NaN	NaN	21.8134	NaN	NaN	23.5147	22.2229	NaN	22.3621	NaN	NaN	NaN	NaN	1	NaN	NaN	NaN	NaN	NaN	NaN	NaN	NaN	1	NaN	NaN	1	1	NaN	1	NaN	NaN	NaN	NaN
P10155;P10155-3;P10155-5;P10155-4;P10155-2	P10155;P10155-3;P10155-5;P10155-4	60 kDa SS-A/Ro ribonucleoprotein	TROVE2	26.9087	26.7753	26.6648	27.392	27.0316	27.8922	26.4247	26.8169	27.4793	26.2408	26.8115	27.6167	27.0394	27.0101	27.3719	27.2842	27.6324	26.8367	26.8123	27.6207	12	10	13	14	13	15	11	12	14	6	12	14	13	10	15	14	11	12	8	15
P10163	P10163	Basic salivary proline-rich protein 4;Protein N1;Glycosylated protein A;Peptide P-D	PRB4	NaN	NaN	NaN	NaN	NaN	NaN	NaN	NaN	NaN	NaN	NaN	NaN	NaN	NaN	NaN	25.9549	NaN	NaN	NaN	NaN	NaN	NaN	NaN	NaN	NaN	NaN	NaN	NaN	NaN	NaN	NaN	NaN	NaN	NaN	NaN	1	NaN	NaN	NaN	NaN
P10253	P10253	Lysosomal alpha-glucosidase;76 kDa lysosomal alpha-glucosidase;70 kDa lysosomal alpha-glucosidase	GAA	28.0005	26.4948	28.1788	25.9782	27.9387	27.0647	27.9658	27.3109	28.1158	28.2154	27.3382	28.4355	28.3524	28.7758	29.907	27.029	27.0799	27.9625	28.4296	27.6953	14	9	15	7	17	9	15	13	14	13	13	16	15	15	16	10	6	13	11	13
P10301	P10301	Ras-related protein R-Ras	RRAS	23.6835	25.9067	25.7149	23.9977	24.0884	24.1552	25.2975	24.2019	24.7692	24.9192	24.9156	25.3009	25.607	24.2232	24.693	23.9802	24.268	23.3606	24.7456	24.3945	1	5	4	4	4	3	4	5	3	2	5	3	3	2	3	2	3	2	2	5
P10316	P10316	HLA class I histocompatibility antigen, A-69 alpha chain	HLA-A	26.0172	26.0976	26.7259	27.4518	26.9113	25.5974	27.5814	27.0685	26.5862	27.0512	25.1337	25.3305	27.6899	25.148	26.2703	26.6987	25.2856	25.0925	26.4439	24.2775	2	1	3	1	1	1	3	1	3	2	2	3	2	1	2	1	1	1	3	1
P10321	P10321	HLA class I histocompatibility antigen, Cw-7 alpha chain	HLA-C	24.1781	23.5513	23.3802	26.2788	25.4986	21.1589	24.9416	25.1393	22.4902	24.8797	23.0862	21.8399	25.6998	22.5814	25.7038	25.359	25.4053	22.9383	27.1595	24.4556	2	1	1	1	1	1	1	1	1	1	1	1	1	1	1	1	1	1	2	1
P10398;P10398-2;P15056	P10398	Serine/threonine-protein kinase A-Raf	ARAF	22.2165	21.6967	21.9483	22.8524	21.9557	NaN	22.9609	22.7862	21.8784	NaN	22.3479	22.6188	22.1433	22.5036	22.4574	21.7548	21.7474	22.3131	22.2573	NaN	4	1	2	1	2	NaN	1	3	1	NaN	2	1	1	1	1	1	1	2	1	NaN
P10412	P10412	Histone H1.4	HIST1H1E	23.7942	21.7498	21.8304	25.0272	27.4639	27.8109	24.6412	24.449	23.5938	22.9627	27.079	28.0412	27.4919	27.4963	27.1377	27.0893	26.8531	27.166	27.4651	NaN	1	1	1	1	1	1	1	1	1	1	1	1	1	1	1	1	1	1	1	NaN
P10415-2;P10415	P10415-2;P10415	Apoptosis regulator Bcl-2	BCL2	NaN	NaN	NaN	NaN	NaN	NaN	NaN	NaN	22.333	NaN	22.3306	NaN	NaN	NaN	NaN	21.9336	NaN	NaN	NaN	NaN	NaN	NaN	NaN	NaN	NaN	NaN	NaN	NaN	1	NaN	2	NaN	NaN	NaN	NaN	1	NaN	NaN	NaN	NaN
P10451-4;P10451;P10451-2;P10451-3;CON__P31096	P10451-4;P10451;P10451-2;P10451-3	Osteopontin	SPP1	NaN	NaN	25.3354	NaN	26.8393	NaN	24.5468	25.2864	28.2197	25.7474	NaN	24.6347	NaN	29.5991	NaN	NaN	24.9084	NaN	27.7473	25.9009	NaN	NaN	4	NaN	6	NaN	3	4	9	4	NaN	3	NaN	10	NaN	NaN	3	NaN	6	6
P10451-5	P10451-5	Osteopontin	SPP1	NaN	NaN	NaN	NaN	25.0335	NaN	NaN	22.5514	24.8437	23.5909	NaN	21.75	NaN	24.3313	NaN	NaN	NaN	NaN	23.6756	21.8506	NaN	NaN	NaN	NaN	1	NaN	NaN	1	1	1	NaN	1	NaN	1	NaN	NaN	NaN	NaN	1	1
P10515	P10515	Dihydrolipoyllysine-residue acetyltransferase component of pyruvate dehydrogenase complex, mitochondrial	DLAT	27.7355	26.8634	29.1497	26.8934	26.3805	26.4077	26.7861	26.8595	25.8749	25.3221	26.237	26.3678	26.8472	26.4757	26.9045	26.603	27.5442	26.8147	26.2608	26.9753	10	9	16	11	11	10	10	10	6	5	10	8	10	8	11	9	11	10	7	11
P10586-2;P10586;P23468-3;P23468-7;P23468-5;P23468-4;P23468-6	P10586-2;P10586	Receptor-type tyrosine-protein phosphatase F	PTPRF	26.6808	NaN	24.2975	29.1218	26.1876	22.1407	21.0802	21.4103	23.2154	NaN	23.3705	24.359	22.2379	22.5353	22.0235	20.6872	23.5411	25.0077	NaN	23.5194	22	2	10	30	18	2	1	2	5	NaN	3	5	2	1	1	2	9	12	NaN	5
P10588	P10588	Nuclear receptor subfamily 2 group F member 6	NR2F6	NaN	NaN	NaN	22.503	22.9879	23.6409	NaN	NaN	NaN	NaN	22.5217	NaN	NaN	NaN	NaN	NaN	NaN	22.3615	NaN	NaN	NaN	NaN	NaN	1	2	2	NaN	NaN	NaN	NaN	1	NaN	NaN	NaN	NaN	NaN	1	1	NaN	NaN
P10599;P10599-2	P10599;P10599-2	Thioredoxin	TXN	30.6954	29.6392	29.5438	30.2264	28.8469	28.7492	29.3942	29.7126	28.7872	27.8261	29.7699	29.4548	29.4397	29.8121	28.9943	29.8007	29.3497	29.3941	28.6071	29.5591	7	6	6	7	6	6	6	7	7	5	7	6	7	6	6	6	6	6	4	6
P10606	P10606	Cytochrome c oxidase subunit 5B, mitochondrial	COX5B	28.385	27.2531	26.284	27.3423	26.4508	25.8921	26.6258	27.1694	23.1718	23.9927	25.4194	26.4753	26.7149	26.8841	27.1299	26.8397	28.3235	27.3109	26.3897	26.8282	4	4	2	3	3	2	3	4	2	1	2	2	2	4	2	3	4	4	2	4
P10619-2;P10619	P10619-2;P10619	Lysosomal protective protein;Lysosomal protective protein 32 kDa chain;Lysosomal protective protein 20 kDa chain	CTSA	26.2358	25.9617	26.1497	26.0927	26.3584	25.8211	25.367	25.9935	27.7391	25.1744	24.7116	26.0515	26.2365	26.8511	26.4738	25.6999	26.102	24.6816	26.0101	25.203	5	4	6	3	6	4	5	5	8	4	3	6	6	7	6	4	5	4	5	3
P10620;P10620-2	P10620;P10620-2	Microsomal glutathione S-transferase 1	MGST1	27.9793	26.4209	25.1336	25.2405	26.1566	25.6983	23.4645	23.9526	26.0745	24.5778	25.958	25.627	27.2067	25.6077	25.3301	27.2209	28.1731	26.7695	24.6838	23.9611	3	3	3	3	3	3	2	2	3	1	3	3	3	3	3	3	3	3	2	2
P10643;CON__Q29RQ1	P10643	Complement component C7	C7	27.0689	26.3647	26.5645	26.2326	27.8065	27.7389	26.2461	26.8694	27.7374	29.279	27.1245	27.5293	27.118	29.023	28.3265	27.1288	27.9529	26.4779	28.3484	26.8174	15	10	12	11	21	18	10	15	19	20	14	14	14	23	22	15	20	11	20	14
P10644;P10644-2;P31321	P10644;P10644-2	cAMP-dependent protein kinase type I-alpha regulatory subunit;cAMP-dependent protein kinase type I-alpha regulatory subunit, N-terminally processed	PRKAR1A	26.487	26.47	25.8967	26.7769	27.3058	27.1657	26.9659	27.065	26.3488	26.269	26.0325	26.9859	27.2844	26.6384	25.7639	27.2515	27.0161	26.4518	26.9023	26.359	10	10	11	12	8	8	10	12	7	5	8	10	10	11	8	12	10	10	8	9
P10645	P10645	Chromogranin-A;Vasostatin-1;Vasostatin-2;EA-92;ES-43;Pancreastatin;SS-18;WA-8;WE-14;LF-19;Catestatin;AL-11;GV-19;GR-44;ER-37;GE-25;Serpinin-RRG;Serpinin;p-Glu serpinin precursor	CHGA	29.7262	NaN	NaN	NaN	18.8908	NaN	NaN	NaN	NaN	NaN	NaN	NaN	NaN	20.7423	NaN	NaN	NaN	NaN	NaN	24.5274	18	NaN	NaN	NaN	1	NaN	NaN	NaN	NaN	NaN	NaN	NaN	NaN	3	NaN	NaN	NaN	NaN	NaN	12
P10646;P10646-2	P10646;P10646-2	Tissue factor pathway inhibitor	TFPI	NaN	NaN	NaN	NaN	NaN	NaN	NaN	NaN	22.5258	NaN	NaN	NaN	NaN	NaN	NaN	NaN	NaN	NaN	NaN	NaN	NaN	NaN	NaN	NaN	NaN	NaN	NaN	NaN	1	NaN	NaN	NaN	NaN	NaN	NaN	NaN	NaN	NaN	NaN	NaN
P10696	P10696	Alkaline phosphatase, placental-like	ALPPL2	29.6315	19.1723	20.7202	19.3699	NaN	NaN	16.6932	NaN	19.0878	19.3744	24.3471	NaN	NaN	28.9442	28.2196	22.2873	33.9607	19.7088	22.3519	19.0426	21	1	4	1	NaN	NaN	1	NaN	1	1	8	NaN	NaN	20	17	5	23	1	6	1
P10768	P10768	S-formylglutathione hydrolase	ESD	28.4138	28.071	28.6128	27.8356	28.2573	28.5779	27.8528	27.8528	28.3431	27.9902	28.432	28.6621	28.4954	28.4061	28.5569	28.1576	28.6349	27.8342	28.1558	28.2425	10	11	12	9	12	11	10	9	10	9	12	12	12	10	11	10	4	10	8	10
P10809;P10809-2	P10809	60 kDa heat shock protein, mitochondrial	HSPD1	32.743	31.4881	31.9447	32.6883	31.5281	31.9952	32.0804	31.8178	31.551	30.2654	31.4834	31.0111	30.507	30.8498	31.8727	31.811	32.1716	32.3051	30.9354	31.1529	36	35	36	36	36	36	35	33	33	24	34	34	32	32	34	35	34	34	27	34
P10909-4;P10909;P10909-5;P10909-2;P10909-3	P10909-4;P10909;P10909-5;P10909-2;P10909-3	Clusterin;Clusterin beta chain;Clusterin alpha chain	CLU	29.2443	28.0572	29.5723	29.7009	29.5478	28.344	29.0467	30.6425	28.6639	32.4351	29.5969	28.2576	31.5958	31.1597	30.1855	27.5891	29.6045	28.1319	29.2275	30.8934	10	9	11	11	10	10	9	13	11	14	11	9	16	16	12	10	10	11	9	14
P10915	P10915	Hyaluronan and proteoglycan link protein 1	HAPLN1	NaN	NaN	NaN	NaN	NaN	NaN	NaN	NaN	NaN	NaN	24.3165	NaN	23.2671	NaN	NaN	NaN	23.6875	NaN	NaN	NaN	NaN	NaN	NaN	NaN	NaN	NaN	NaN	NaN	NaN	NaN	1	NaN	1	NaN	NaN	NaN	1	NaN	NaN	NaN
P11021	P11021	78 kDa glucose-regulated protein	HSPA5	31.4546	31.8637	31.5578	31.8315	31.662	31.0178	31.8257	31.6197	31.3112	30.7262	31.5336	31.3388	31.4715	30.8728	32.599	31.8508	31.1664	31.3058	31.7687	31.6937	27	28	29	28	28	24	29	29	28	23	30	27	29	26	30	30	25	27	28	26
P11047	P11047	Laminin subunit gamma-1	LAMC1	28.3771	28.7601	28.8734	28.3785	30.1872	29.5906	28.3982	28.0318	31.4265	30.0083	29.2623	29.6946	29.5654	29.6114	30.2503	29.2168	29.096	29.0578	29.8381	29.2865	36	41	43	35	53	46	37	31	53	43	43	46	43	46	48	44	37	39	38	39
P11117;P11117-2	P11117	Lysosomal acid phosphatase	ACP2	NaN	24.7199	26.4961	25.0442	24.9134	23.8883	24.5062	25.1041	25.7074	24.7116	24.4271	24.4008	25.5852	25.2782	24.898	25.3016	24.0429	25.0602	25.2906	24.9532	NaN	5	6	6	6	5	5	4	6	3	2	5	6	4	6	6	4	5	5	6
P11142;P11142-2	P11142;P11142-2	Heat shock cognate 71 kDa protein	HSPA8	32.1436	31.9793	31.776	31.9259	32.1731	31.8865	31.7514	32.1057	32.1608	31.201	32.0994	32.0496	31.9037	31.8536	31.8164	32.3453	32.1374	32.4766	31.8961	32.2999	28	26	29	29	28	27	26	29	27	25	30	30	30	27	29	29	29	30	26	30
P11166	P11166	Solute carrier family 2, facilitated glucose transporter member 1	SLC2A1	25.7703	26.2566	28.8054	27.4093	28.641	26.2652	27.3524	28.9528	26.9795	28.158	25.1692	25.466	25.3005	26.373	27.7621	26.0369	25.9339	27.6569	26.6962	25.2401	5	5	6	6	6	4	5	6	6	6	4	3	4	5	7	4	5	6	5	4
P11169;Q8TDB8-4;Q8TDB8-2;Q8TDB8;Q8TDB8-5;Q8TDB8-3	P11169;Q8TDB8-4;Q8TDB8-2;Q8TDB8;Q8TDB8-5	Solute carrier family 2, facilitated glucose transporter member 3;Solute carrier family 2, facilitated glucose transporter member 14	SLC2A3;SLC2A14	22.3233	NaN	NaN	NaN	23.2689	NaN	22.7188	22.426	NaN	25.3794	NaN	NaN	NaN	24.4758	NaN	NaN	20.8006	NaN	23.6674	NaN	1	NaN	NaN	NaN	1	NaN	1	1	NaN	3	NaN	NaN	NaN	5	NaN	1	1	NaN	1	NaN
P11171-7;P11171-2;P11171;P11171-4;P11171-3;P11171-5;P11171-6	P11171-7;P11171-2;P11171;P11171-4;P11171-3;P11171-5;P11171-6	Protein 4.1	EPB41	24.5436	23.0922	23.2843	23.3842	NaN	23.322	22.5689	22.4625	23.4702	22.9652	23.4716	24.3838	23.7977	NaN	NaN	23.8207	23.0002	NaN	24.8905	23.5765	4	2	2	3	NaN	2	2	3	1	1	2	2	2	NaN	NaN	3	2	NaN	2	3
P11172;P11172-3;P11172-2;P11172-4	P11172;P11172-3;P11172-2	Uridine 5-monophosphate synthase;Orotate phosphoribosyltransferase;Orotidine 5-phosphate decarboxylase	UMPS	26.7375	25.8636	26.0629	27.2617	25.9814	26.3633	26.1391	26.979	26.0265	NaN	25.9921	25.5004	25.6122	25.4704	26.4446	26.1934	25.7697	26.3753	24.1301	25.9574	12	9	12	14	10	10	12	13	11	NaN	11	9	7	8	11	11	9	12	4	11
P11177-2;P11177;P11177-3	P11177-2;P11177;P11177-3	Pyruvate dehydrogenase E1 component subunit beta, mitochondrial	PDHB	28.7595	27.6646	28.3924	28.3852	27.8226	27.8382	28.2538	28.0322	28.0028	24.5712	27.4952	27.3112	27.5248	27.303	28.1508	27.5696	28.6017	27.5817	27.2721	27.6622	16	13	16	17	13	15	15	15	16	5	14	12	13	14	12	13	14	13	8	14
P11182	P11182	Lipoamide acyltransferase component of branched-chain alpha-keto acid dehydrogenase complex, mitochondrial	DBT	27.683	25.6737	26.9451	27.2068	25.3252	26.9343	26.2486	26.2211	25.8121	NaN	26.3295	26.6937	26.1213	26.2954	26.5078	26.0892	27.2675	26.4526	25.3912	26.6153	13	14	13	15	9	11	11	13	8	NaN	12	14	13	11	10	14	8	13	5	14
P11215;P11215-2;Q13349	P11215;P11215-2	Integrin alpha-M	ITGAM	24.1155	24.1978	21.5796	21.5541	26.865	NaN	25.0652	26.7317	23.5795	25.9386	NaN	22.8192	26.0501	28.8029	NaN	25.4852	21.5309	20.6289	26.5357	NaN	8	4	2	1	18	NaN	13	18	3	18	NaN	5	17	29	NaN	19	3	2	15	NaN
P11216	P11216	Glycogen phosphorylase, brain form	PYGB	27.3944	28.3157	29.5906	28.528	28.2101	28.2727	28.3956	28.0697	28.3847	27.5525	30.2147	28.1548	28.6005	30.1986	28.7867	27.9423	28.4315	27.0718	28.2136	28.6746	22	25	27	28	22	24	26	25	24	10	29	22	20	28	25	25	18	19	15	25
P11217;P11217-2	P11217;P11217-2	Glycogen phosphorylase, muscle form	PYGM	22.6694	24.2069	25.4549	NaN	NaN	24.028	24.5963	NaN	NaN	NaN	NaN	NaN	NaN	22.3223	24.6793	NaN	NaN	NaN	NaN	NaN	2	2	1	NaN	1	1	1	1	NaN	NaN	NaN	NaN	NaN	1	1	NaN	NaN	1	NaN	NaN
P11226	P11226	Mannose-binding protein C	MBL2	NaN	NaN	NaN	NaN	NaN	NaN	NaN	NaN	NaN	22.1433	NaN	NaN	NaN	NaN	NaN	NaN	NaN	NaN	NaN	NaN	1	1	1	NaN	NaN	NaN	1	NaN	1	1	NaN	NaN	NaN	1	NaN	NaN	NaN	NaN	NaN	NaN
P11233	P11233	Ras-related protein Ral-A	RALA	23.9271	23.9376	23.7329	23.9805	23.7972	23.786	23.8319	23.6422	23.3902	24.0903	23.802	24.1859	23.4701	23.6813	23.9498	24.0405	24.6933	24.3125	23.8116	23.9357	2	1	2	2	2	2	2	2	2	2	2	2	2	2	2	2	2	2	1	2
P11234;P11234-2;P11234-3	P11234;P11234-2;P11234-3	Ras-related protein Ral-B	RALB	25.5437	25.5166	25.0481	25.6807	25.1693	25.2291	25.4473	25.4637	25.1715	25.1711	25.6767	25.5278	25.2494	25.7227	25.6316	26.1038	25.6438	25.9367	25.4088	25.4636	5	4	2	5	3	4	4	4	4	4	3	3	5	5	5	4	3	5	4	5
P11277-3;P11277;P11277-2	P11277-3;P11277;P11277-2	Spectrin beta chain, erythrocytic	SPTB	20.6425	NaN	21.6221	21.4893	23.1106	25.2914	NaN	23.2821	25.4308	24.6041	NaN	NaN	22.1034	23.2484	21.7582	NaN	22.133	21.9831	27.4049	21.3911	3	NaN	1	1	6	9	NaN	3	13	7	NaN	NaN	1	5	1	NaN	1	2	20	1
P11279;P11279-2	P11279;P11279-2	Lysosome-associated membrane glycoprotein 1	LAMP1	27.4124	27.1785	28.9778	27.4995	26.7945	26.0981	26.55	26.8615	27.1142	27.2004	27.7074	27.3109	27.6125	27.8404	29.4262	27.2537	26.7561	27.3239	26.5573	27.7807	5	5	5	5	5	5	5	5	5	5	5	5	5	4	6	4	4	5	5	5
P11310;P11310-2	P11310;P11310-2	Medium-chain specific acyl-CoA dehydrogenase, mitochondrial	ACADM	28.6125	26.8218	25.3265	27.761	26.1763	26.1443	27.5263	26.7676	26.1554	25.4789	26.8244	26.6649	26.915	26.9001	27.8542	26.5038	28.1191	26.1944	26.8392	27.1016	13	10	5	14	8	8	14	8	7	5	10	11	11	9	11	11	10	8	7	11
P11387;Q969P6-2;Q969P6	P11387	DNA topoisomerase 1	TOP1	27.0745	26.994	26.7571	27.1731	26.3559	26.9932	26.8805	27.0508	26.9273	22.8335	26.483	26.4522	26.3771	26.6894	26.6141	26.8125	27.0314	27.4355	26.157	26.7797	20	13	17	17	12	14	16	16	16	3	17	13	9	16	15	17	13	15	6	15
P11388;P11388-2;P11388-3;P11388-4	P11388;P11388-2;P11388-3;P11388-4	DNA topoisomerase 2-alpha	TOP2A	NaN	23.4268	NaN	26.8353	23.634	22.2639	21.6019	23.8035	20.436	NaN	NaN	NaN	NaN	NaN	NaN	23.0524	NaN	24.3398	NaN	NaN	NaN	5	NaN	15	4	2	1	8	1	NaN	NaN	NaN	NaN	NaN	NaN	6	1	12	NaN	NaN
P11413;P11413-3;P11413-2	P11413;P11413-3;P11413-2	Glucose-6-phosphate 1-dehydrogenase	G6PD	27.8065	27.777	27.9109	27.2822	27.5997	27.4475	27.6574	27.9218	27.0042	28.2632	27.9114	27.8398	28.3086	28.892	27.9557	28.4611	26.7167	27.7943	27.6691	27.3585	22	19	20	18	19	18	19	22	17	16	18	21	21	21	21	21	14	18	17	17
P11441	P11441	Ubiquitin-like protein 4A	UBL4A	18.3344	18.5442	NaN	21.0218	18.7442	22.5058	NaN	NaN	18.8233	18.8678	NaN	18.2924	NaN	19.1431	22.3061	18.8596	18.3541	20.3731	NaN	NaN	2	2	NaN	1	1	1	1	NaN	2	1	NaN	1	NaN	1	1	2	1	1	NaN	NaN
P11464-3;P11464;P11464-4;P11464-2;Q13046	P11464-3;P11464;P11464-4;P11464-2	Pregnancy-specific beta-1-glycoprotein 1	PSG1	NaN	NaN	NaN	NaN	21.6211	NaN	NaN	NaN	20.7574	NaN	NaN	NaN	NaN	NaN	NaN	NaN	NaN	NaN	NaN	NaN	NaN	NaN	NaN	NaN	1	NaN	NaN	NaN	1	NaN	NaN	NaN	NaN	NaN	NaN	NaN	NaN	NaN	NaN	NaN
P11465	P11465	Pregnancy-specific beta-1-glycoprotein 2	PSG2	NaN	NaN	NaN	NaN	NaN	NaN	NaN	NaN	NaN	NaN	NaN	NaN	NaN	NaN	20.9216	NaN	NaN	NaN	20.9666	NaN	NaN	NaN	NaN	NaN	NaN	NaN	NaN	NaN	NaN	NaN	NaN	NaN	NaN	NaN	1	NaN	NaN	NaN	1	1
P11498;P11498-2	P11498	Pyruvate carboxylase, mitochondrial	PC	26.4906	25.3826	26.1891	26.6834	24.9609	22.5032	24.829	26.7272	27.5603	NaN	23.6159	24.8751	24.1363	25.0717	NaN	23.8603	24.4185	25.459	NaN	23.6905	16	10	12	11	11	2	6	22	22	NaN	2	1	4	9	NaN	2	4	1	NaN	2
P11511;P11511-2	P11511	Aromatase	CYP19A1	NaN	20.4314	21.5118	21.12	NaN	NaN	NaN	21.6668	NaN	23.5387	20.1398	21.3341	NaN	21.3655	NaN	21.0622	23.1153	NaN	NaN	NaN	NaN	1	1	1	NaN	NaN	NaN	1	NaN	2	2	1	NaN	1	NaN	1	2	NaN	NaN	NaN
P11532-4;P11532;P11532-3;P11532-2;P11532-7;P11532-10;Q13474-2;Q13474	P11532-4;P11532;P11532-3;P11532-2	Dystrophin	DMD	22.0693	24.5262	21.7327	22.9394	23.3918	25.2632	21.3867	23.0942	23.5907	NaN	22.9769	23.8015	23.5975	24.6931	23.2654	22.608	NaN	24.1189	21.0652	22.6299	2	3	4	4	7	19	3	2	5	NaN	3	6	9	1	3	3	1	1	1	4
P11586	P11586	C-1-tetrahydrofolate synthase, cytoplasmic;Methylenetetrahydrofolate dehydrogenase;Methenyltetrahydrofolate cyclohydrolase;Formyltetrahydrofolate synthetase;C-1-tetrahydrofolate synthase, cytoplasmic, N-terminally processed	MTHFD1	29.3876	28.3655	28.0758	28.1788	28.243	28.603	29.3892	28.7902	28.4958	27.7403	29.4921	28.5079	28.7557	28.298	28.6174	28.9816	28.4507	29.2112	28.4736	28.7476	40	33	35	32	34	35	36	36	35	16	38	31	34	27	30	36	27	37	29	36
P11678	P11678	Eosinophil peroxidase;Eosinophil peroxidase light chain;Eosinophil peroxidase heavy chain	EPX	27.1421	22.3032	20.028	21.0392	20.3685	NaN	20.7177	21.908	22.4877	23.0003	23.3076	23.5318	26.717	22.2094	NaN	20.4735	NaN	NaN	NaN	22.5024	12	4	1	2	1	NaN	1	2	3	1	1	1	12	2	NaN	1	NaN	NaN	NaN	3
P11717	P11717	Cation-independent mannose-6-phosphate receptor	IGF2R	25.9745	26.7256	25.3851	27.5369	27.0239	25.9631	25.2644	26.4167	26.0594	25.0103	25.8768	27.156	26.9914	27.0531	27.1806	27.5596	26.1042	27.7546	26.4702	27.4133	17	22	9	32	22	10	5	19	16	4	18	28	21	23	24	34	11	32	8	30
P11766	P11766	Alcohol dehydrogenase class-3	ADH5	28.9777	28.6231	28.3465	27.8854	28.8294	29.4911	28.0511	29.0229	28.4239	27.1949	29.3145	29.5867	29.9171	29.8165	29.8123	29.5392	29.0823	28.9571	28.9775	29.5916	17	15	14	13	14	14	13	15	15	8	15	14	16	14	15	15	13	14	15	16
P11908;P11908-2	P11908;P11908-2	Ribose-phosphate pyrophosphokinase 2	PRPS2	26.2888	26.4596	25.4917	25.1281	26.6101	26.1533	26.2025	26.962	24.7765	25.4446	26.5045	25.8383	26.155	26.5446	26.5248	26.5123	26.2574	26.3109	26.5736	25.9651	6	8	5	6	5	4	6	10	5	3	9	7	4	7	7	8	7	10	5	6
P11940;P11940-2;Q4VXU2;Q4VXU2-2;Q96DU9-2;Q96DU9	P11940;P11940-2	Polyadenylate-binding protein 1	PABPC1	29.2259	29.3973	28.9311	29.4203	29.0181	28.6557	29.254	29.5585	29.1152	27.7923	28.8834	28.9688	28.8759	28.9217	29.01	29.3311	28.9639	29.8148	28.5471	29.1046	20	19	21	21	20	20	21	21	18	14	21	21	21	19	20	20	18	21	18	21
P12004	P12004	Proliferating cell nuclear antigen	PCNA	26.4879	27.684	27.7584	27.9997	28.2448	27.6895	27.4696	27.4257	27.4989	26.0139	27.4939	26.5826	25.9377	26.2531	27.1139	27.1607	26.2099	27.8798	27.0591	26.535	7	9	10	11	9	8	8	9	7	5	11	7	7	5	8	8	5	8	6	7
P12081-4;P12081;P12081-3;P12081-2	P12081-4;P12081;P12081-3;P12081-2	Histidine--tRNA ligase, cytoplasmic	HARS	27.4742	27.1071	27.0475	26.164	26.6861	26.8905	27.2103	27.2766	26.9225	26.2284	26.6995	26.7552	26.919	27.1488	26.4738	27.2397	26.6648	27.3411	26.8558	27.2339	16	15	17	15	13	13	18	16	16	4	14	13	16	16	12	17	10	16	11	16
P12107-4;P12107-3;P12107;P12107-2	P12107-4;P12107-3;P12107;P12107-2	Collagen alpha-1(XI) chain	COL11A1	NaN	25.728	NaN	NaN	NaN	NaN	24.7727	NaN	NaN	26.2447	NaN	NaN	NaN	NaN	NaN	NaN	NaN	NaN	24.8293	NaN	NaN	7	NaN	NaN	NaN	NaN	7	NaN	NaN	11	NaN	NaN	NaN	NaN	NaN	NaN	NaN	NaN	1	NaN
P12109	P12109	Collagen alpha-1(VI) chain	COL6A1	31.3387	31.7099	31.1224	30.9068	32.4218	33.4761	32.2426	31.2399	32.3697	33.7911	31.289	32.2378	32.0799	32.6642	32.066	31.3894	32.0024	30.9068	32.4792	31.5439	35	34	36	32	36	38	39	34	36	36	36	36	36	36	36	32	33	32	31	35
P12110;P12110-3	P12110;P12110-3	Collagen alpha-2(VI) chain	COL6A2	30.4422	30.9788	30.0231	30.0587	31.551	32.817	31.6363	30.376	31.7466	33.1231	30.6789	31.5387	31.2696	31.8385	31.2202	30.6408	31.1007	29.9955	31.8413	30.673	27	31	25	29	27	35	31	25	30	30	26	31	29	32	28	24	26	21	28	24
P12111;P12111-2;P12111-5;P12111-3	P12111;P12111-2	Collagen alpha-3(VI) chain	COL6A3	32.8353	33.3132	32.6173	32.4676	34.1983	35.3032	33.8596	32.8167	34.0419	35.627	32.8955	33.8368	33.628	34.3083	33.704	32.9585	33.4862	32.4444	34.3051	33.0946	120	126	118	111	143	148	132	121	126	141	116	129	123	129	134	121	118	115	126	117
P12111-4	P12111-4	Collagen alpha-3(VI) chain	COL6A3	19.65	20.2212	NaN	20.6517	19.7204	21.2274	21.0687	19.1765	19.533	19.5325	19.3531	21.1454	19.7282	20.1325	NaN	19.5052	NaN	NaN	NaN	18.9104	1	1	NaN	1	1	1	1	1	1	1	1	1	1	1	NaN	1	NaN	NaN	NaN	1
P12235	P12235	ADP/ATP translocase 1	SLC25A4	27.3197	25.2835	25.9594	25.2081	25.6842	25.7108	26.043	25.9049	26.0203	23.9873	25.6134	25.7978	26.0533	25.7696	25.9365	25.9893	26.6103	26.2659	25.0402	26.3983	5	4	5	5	4	5	5	4	5	2	5	4	5	5	5	5	5	5	5	4
P12236	P12236	ADP/ATP translocase 3;ADP/ATP translocase 3, N-terminally processed	SLC25A6	30.5611	30.1194	30.0933	30.0474	29.1802	29.6397	30.3258	30.4024	29.2265	28.4431	29.7745	29.3502	29.5213	29.7272	29.6761	29.7219	30.2106	30.0044	29.6909	29.8065	19	18	19	17	15	16	16	19	16	11	16	16	15	18	16	16	11	14	14	15
P12259	P12259	Coagulation factor V;Coagulation factor V heavy chain;Coagulation factor V light chain	F5	NaN	NaN	NaN	NaN	NaN	NaN	NaN	NaN	NaN	24.6778	NaN	NaN	NaN	NaN	NaN	26.9144	NaN	NaN	22.8986	NaN	NaN	NaN	NaN	NaN	NaN	NaN	NaN	NaN	NaN	6	NaN	NaN	NaN	NaN	NaN	1	NaN	NaN	1	NaN
P12268	P12268	Inosine-5-monophosphate dehydrogenase 2	IMPDH2	27.9383	27.6255	27.0771	28.679	27.7524	27.8258	27.7889	27.1728	29.5957	26.8073	27.4613	27.3013	27.1397	27.6939	27.8901	27.5107	28.1483	28.4179	27.7108	27.4693	20	16	17	22	14	16	15	17	23	9	17	14	16	16	17	17	17	20	12	14
P12270;P12270-2	P12270	Nucleoprotein TPR	TPR	27.8373	27.8032	28.2425	28.5737	28.2689	28.2916	27.684	27.9552	28.1729	23.5199	27.4742	28.0792	27.7624	27.6726	27.654	28.1171	27.9221	28.2626	27.5259	27.6471	39	34	38	46	40	39	41	45	42	3	30	38	33	30	34	43	30	41	26	33
P12277;P06732	P12277	Creatine kinase B-type	CKB	24.9652	27.196	29.1421	28.4409	27.9793	29.6026	22.8602	25.2418	27.0095	23.5409	28.7132	27.9569	27.9926	29.9438	28.9041	27.199	29.0909	30.7471	22.277	29.2486	5	13	17	15	16	14	5	7	11	3	15	15	15	16	16	13	13	16	2	14
P12314;P12314-2;Q92637-2	P12314;P12314-2	High affinity immunoglobulin gamma Fc receptor I	FCGR1A	NaN	22.8199	NaN	NaN	23.2336	NaN	23.3665	23.4914	22.704	23.9331	NaN	22.9072	23.2227	23.2455	22.2276	22.7989	NaN	22.0304	24.3074	NaN	NaN	2	NaN	NaN	2	NaN	1	2	1	2	NaN	2	2	2	1	1	NaN	1	3	NaN
P12318-2;P12318	P12318-2;P12318	Low affinity immunoglobulin gamma Fc region receptor II-a	FCGR2A	NaN	23.2828	22.303	NaN	22.4394	NaN	21.9401	22.6095	NaN	24.3787	NaN	23.6781	22.3733	23.4244	NaN	22.7247	NaN	21.6765	NaN	NaN	NaN	1	1	NaN	1	NaN	1	1	NaN	1	NaN	1	1	1	NaN	1	NaN	1	NaN	NaN
P12429	P12429	Annexin A3	ANXA3	27.703	26.5545	27.2014	27.9116	27.3801	27.9945	26.521	27.9972	22.0017	26.6321	28.464	28.182	27.92	29.6925	28.0706	28.3812	27.5458	27.3313	27.1862	28.885	16	12	12	17	14	16	11	15	1	8	17	14	15	17	14	16	10	15	9	18
P12532;P12532-2	P12532;P12532-2	Creatine kinase U-type, mitochondrial	CKMT1A	31.0217	25.1152	25.5616	27.2697	25.3321	24.9183	27.6919	25.3289	24.6737	23.1151	27.141	24.8745	24.8641	25.3645	26.919	26.0724	26.3492	26.4665	25.3602	25.7047	16	5	7	10	6	1	15	9	4	2	13	2	2	3	12	8	9	6	6	5
P12694;P12694-2	P12694;P12694-2	2-oxoisovalerate dehydrogenase subunit alpha, mitochondrial	BCKDHA	27.1588	25.7712	26.4533	27.068	23.7846	23.9323	22.6712	25.1628	25.187	NaN	26.9524	25.4276	25.8065	25.894	23.4583	25.6228	25.7234	25.9818	NaN	25.3492	12	9	11	12	4	3	4	6	7	NaN	11	7	9	6	5	11	8	9	NaN	7
P12724	P12724	Eosinophil cationic protein	RNASE3	25.934	21.7252	NaN	NaN	22.617	20.919	22.3658	23.5295	21.7758	24.2893	NaN	20.9346	25.4439	26.858	20.4678	23.6285	24.3378	22.5194	24.512	21.7043	3	1	NaN	NaN	1	1	1	3	1	3	NaN	1	4	4	1	2	3	1	3	1
P12814	P12814	Alpha-actinin-1	ACTN1	24.4361	25.9512	25.0507	23.8213	24.9198	25.4406	25.5305	24.8774	24.2664	25.5651	24.2447	24.4263	24.6354	24.7659	24.4799	24.2635	23.8937	24.2101	25.9782	25.1019	1	1	1	1	1	1	1	1	1	1	1	1	1	1	1	1	1	1	1	1
P12814-3;P12814-2;P12814-4	P12814-3;P12814-2;P12814-4	Alpha-actinin-1	ACTN1	29.4706	31.6329	30.3957	29.6748	30.5716	30.8496	31.121	30.3548	30.0373	31.4419	30.1545	30.9403	30.6515	30.7723	30.726	30.4469	29.7439	29.9123	30.6618	31.1852	33	36	33	32	34	35	35	32	26	31	27	36	32	31	31	33	28	30	30	31
P12821;P12821-2;P12821-4;P12821-3	P12821;P12821-2;P12821-4;P12821-3	Angiotensin-converting enzyme;Angiotensin-converting enzyme, soluble form	ACE	NaN	NaN	22.7387	22.6003	NaN	22.0559	21.9428	23.3496	NaN	23.1388	23.6577	NaN	26.1461	26.566	24.4654	24.3709	25.8091	NaN	NaN	23.6648	NaN	NaN	2	1	NaN	1	1	3	NaN	4	5	NaN	13	17	6	8	15	NaN	NaN	7
P12830;P12830-2	P12830;P12830-2	Cadherin-1;E-Cad/CTF1;E-Cad/CTF2;E-Cad/CTF3	CDH1	28.0235	25.4376	28.274	27.6429	27.2733	25.9009	27.1141	26.6088	28.265	24.4017	26.3193	27.8015	27.709	27.6072	27.5143	26.9666	28.1219	27.4324	26.3147	27.2775	13	5	13	15	12	7	9	12	13	2	9	13	11	14	13	9	11	12	6	10
P12838	P12838	Neutrophil defensin 4	DEFA4	21.38	NaN	NaN	NaN	NaN	NaN	NaN	NaN	NaN	NaN	NaN	NaN	NaN	22.981	NaN	22.4524	NaN	NaN	NaN	NaN	1	NaN	NaN	NaN	NaN	NaN	NaN	NaN	NaN	NaN	NaN	NaN	NaN	1	NaN	1	NaN	NaN	1	NaN
P12931-2;P12931;Q9H3Y6	P12931-2;P12931	Proto-oncogene tyrosine-protein kinase Src	SRC	26.7863	24.6354	26.4803	24.3769	26.6954	24.5314	24.1518	25.2616	26.4447	24.4764	24.0956	24.2324	24.8742	25.1865	25.3959	24.7119	25.4051	24.9566	25.0628	24.9359	14	6	11	5	13	6	3	9	11	3	1	3	7	9	6	6	10	6	5	6
P12955;P12955-3;P12955-2	P12955;P12955-3;P12955-2	Xaa-Pro dipeptidase	PEPD	25.9997	27.144	27.4586	26.8526	26.8893	26.5041	26.9684	27.0469	26.9076	26.4306	27.1568	26.4501	26.8429	26.6186	26.6857	26.7627	25.4811	26.2519	26.1981	26.5869	11	13	13	13	11	11	12	12	12	8	12	10	9	11	9	12	8	11	9	10
P12956;P12956-2	P12956;P12956-2	X-ray repair cross-complementing protein 6	XRCC6	30.2771	29.8262	29.8829	30.9093	29.8425	30.25	30.3011	29.7693	30.6681	28.6033	30.4669	30.3062	30.1635	30.3571	30.3452	30.3532	30.5591	30.5017	29.9845	30.3606	31	28	29	30	26	30	28	27	28	20	30	28	29	29	27	29	24	30	22	28
P13010	P13010	X-ray repair cross-complementing protein 5	XRCC5	30.4267	29.9453	29.8954	30.9478	29.9783	30.1968	30.263	29.8013	30.6725	28.7152	30.5163	30.3755	30.2066	30.399	30.4893	30.4151	30.5807	30.5811	30.0941	30.4544	39	35	34	36	34	37	36	33	36	19	36	35	37	38	37	38	26	37	31	38
P13051-2;P13051	P13051-2;P13051	Uracil-DNA glycosylase	UNG	NaN	NaN	NaN	22.7216	NaN	NaN	NaN	NaN	NaN	NaN	NaN	NaN	NaN	NaN	NaN	NaN	23.0219	22.7666	NaN	NaN	NaN	NaN	NaN	1	NaN	NaN	NaN	NaN	NaN	NaN	NaN	NaN	NaN	NaN	NaN	NaN	1	1	NaN	NaN
P13073	P13073	Cytochrome c oxidase subunit 4 isoform 1, mitochondrial	COX4I1	29.355	28.0939	28.0367	28.2788	27.8526	27.5053	28.0508	28.4389	27.7334	27.0279	28.1971	27.897	28.0745	28.1969	28.5178	28.1482	29.543	28.7189	28.1156	28.1972	6	6	6	6	6	6	6	6	5	6	6	6	6	4	6	6	6	6	5	6
P13284	P13284	Gamma-interferon-inducible lysosomal thiol reductase	IFI30	27.1873	27.2845	25.6498	26.2244	27.4904	25.0303	27.4815	27.7037	27.9174	27.9516	24.6658	26.0474	27.8513	26.3465	28.7298	27.1001	NaN	25.6112	28.3575	26.3338	4	4	3	4	4	3	4	4	5	4	3	3	5	4	5	4	NaN	4	4	4
P13473-2;P13473;P13473-3	P13473-2;P13473;P13473-3	Lysosome-associated membrane glycoprotein 2	LAMP2	25.3836	25.5485	28.25	26.5828	25.1824	25.2821	25.5013	25.6556	25.6035	24.8923	26.1207	25.401	26.2179	27.5493	27.1956	25.5788	25.8224	25.6946	25.6484	26.6632	4	3	4	3	4	4	2	3	4	3	4	4	4	4	4	4	3	4	4	3
P13489	P13489	Ribonuclease inhibitor	RNH1	28.3279	29.7116	28.8627	29.5204	29.5066	29.2934	29.6305	29.4335	29.7125	29.1772	29.3973	29.6051	30.0727	29.4149	29.3507	29.3049	28.8145	29.0718	29.5337	29.5616	18	20	18	20	21	18	20	20	20	16	20	20	21	19	18	19	12	17	19	20
P13497;P13497-5;P13497-2;P13497-6;P13497-4;O43897-2;Q9Y6L7	P13497;P13497-5;P13497-2;P13497-6;P13497-4	Bone morphogenetic protein 1	BMP1	NaN	NaN	NaN	NaN	NaN	NaN	NaN	NaN	NaN	24.439	NaN	NaN	NaN	NaN	NaN	NaN	NaN	NaN	NaN	NaN	NaN	NaN	NaN	NaN	NaN	NaN	NaN	NaN	NaN	4	NaN	NaN	NaN	NaN	NaN	NaN	NaN	NaN	NaN	NaN
P13498	P13498	Cytochrome b-245 light chain	CYBA	23.362	24.7878	23.9991	23.1207	24.4844	23.9784	24.3896	25.4537	24.0948	25.1558	23.2621	23.6834	25.2788	25.3579	23.3569	24.9468	23.6225	23.3828	25.4682	23.8539	1	3	1	1	2	1	2	3	2	1	2	1	2	4	2	2	1	2	3	1
P13521	P13521	Secretogranin-2;Secretoneurin;Manserin	SCG2	20.057	27.6326	22.7353	NaN	26.9248	NaN	28.3955	28.4247	28.0368	NaN	NaN	20.023	NaN	26.1929	20.1098	20.329	NaN	22.1264	26.2866	NaN	1	1	1	NaN	1	NaN	1	1	1	NaN	NaN	1	NaN	1	1	1	1	1	1	NaN
P13533;P12883	P13533;P12883	Myosin-6;Myosin-7	MYH6;MYH7	22.2131	22.45	NaN	23.0296	NaN	21.8507	23.1103	21.8021	NaN	NaN	22.0652	22.3618	NaN	NaN	NaN	22.5874	NaN	22.8888	NaN	22.604	1	2	NaN	2	NaN	1	1	1	NaN	NaN	1	1	NaN	NaN	NaN	1	NaN	3	NaN	1
P13591-1;P13591;P13591-4;P13591-3;P13591-5;P13591-6	P13591-1;P13591;P13591-4;P13591-3;P13591-5	Neural cell adhesion molecule 1	NCAM1	NaN	22.0999	NaN	NaN	24.2998	26.2412	22.6498	NaN	22.2835	22.6019	NaN	23.1722	25.6727	20.6205	23.7003	20.5832	NaN	NaN	24.3766	25.3523	NaN	1	NaN	NaN	9	13	2	NaN	3	2	NaN	2	11	1	5	1	NaN	NaN	7	9
P13611;P13611-2;P13611-5;P13611-3;P13611-4	P13611;P13611-2;P13611-5;P13611-3;P13611-4	Versican core protein	VCAN	25.1338	30.1899	30.2875	27.3876	29.4217	26.6388	28.4544	28.2414	31.434	31.5724	28.1327	29.4624	27.6752	26.3203	28.0393	27.7031	26.8912	28.2887	29.3111	29.7075	7	21	22	19	26	10	17	18	27	26	21	21	17	14	18	16	12	21	19	23
P13639	P13639	Elongation factor 2	EEF2	31.7769	31.9979	31.3484	31.8968	31.3223	31.3497	31.692	31.3453	30.9987	31.0559	31.5804	31.4631	31.4532	31.3542	31.8876	32.0283	31.5687	32.2797	31.4575	31.9094	47	44	46	44	44	44	43	44	42	37	43	44	44	43	45	45	39	45	36	45
P13646;CON__ENSEMBL:ENSP00000377550;P13646-3;P13646-2	P13646;CON__ENSEMBL:ENSP00000377550;P13646-3;P13646-2	Keratin, type I cytoskeletal 13	KRT13	NaN	NaN	NaN	20.8563	NaN	21.0085	NaN	NaN	NaN	NaN	23.5303	20.1583	19.3642	NaN	NaN	NaN	18.7749	27.5292	NaN	19.9355	NaN	NaN	NaN	1	NaN	2	NaN	NaN	NaN	NaN	5	1	1	NaN	NaN	NaN	1	9	NaN	1
P13667	P13667	Protein disulfide-isomerase A4	PDIA4	30.417	31.1031	31.3658	30.2637	30.896	30.699	30.8569	30.3802	30.2686	29.4746	30.0392	31.1971	30.8069	30.7858	32.3467	31.4241	30.2542	30.7517	31.0591	31.3912	33	31	34	28	28	32	28	31	28	19	28	31	32	29	33	33	28	31	29	31
P13671	P13671	Complement component C6	C6	26.3245	26.2362	26.923	25.6099	26.7001	26.576	26.0424	26.6055	26.3134	28.9655	26.571	25.7672	25.3867	27.6099	26.1208	25.8074	27.3812	26.142	26.7624	26.3647	11	12	15	12	12	12	12	14	10	21	12	10	9	16	8	10	15	10	14	14
P13674;P13674-2;P13674-3	P13674;P13674-2;P13674-3	Prolyl 4-hydroxylase subunit alpha-1	P4HA1	27.1262	27.6084	28.6966	26.7684	28.401	27.3465	27.7879	28.5518	27.383	27.9651	27.6326	27.0549	26.4729	26.896	27.808	27.625	26.5728	28.031	27.1813	26.8265	15	16	16	13	14	14	15	16	14	14	13	13	9	11	14	14	10	14	12	11
P13688-2;P13688-8;P13688-10;P13688;P13688-3;P13688-4;P13688-11;P13688-9;P13688-6;P13688-5;P13688-7	P13688-2;P13688-8;P13688-10;P13688;P13688-3;P13688-4;P13688-11;P13688-9;P13688-6;P13688-5	Carcinoembryonic antigen-related cell adhesion molecule 1	CEACAM1	23.2661	NaN	NaN	NaN	NaN	NaN	NaN	NaN	22.6237	NaN	22.1419	NaN	23.8547	24.743	22.8776	21.9047	22.3572	23.0794	NaN	NaN	1	NaN	NaN	NaN	NaN	NaN	NaN	NaN	3	NaN	1	NaN	6	2	1	2	1	1	NaN	NaN
P13693;P13693-2;Q56UQ5	P13693;P13693-2	Translationally-controlled tumor protein	TPT1	28.3171	28.6077	28.4301	27.8689	28.4553	27.6574	27.7839	28.0227	27.9045	27.7997	28.0087	27.7189	27.8494	27.9996	28.3121	28.0835	27.5899	27.7789	27.6656	27.6183	6	7	7	7	8	7	8	6	7	5	7	6	6	6	6	7	5	7	7	7
P13716;P13716-2	P13716;P13716-2	Delta-aminolevulinic acid dehydratase	ALAD	26.1287	25.7375	25.6004	25.413	25.7998	26.3571	25.4982	25.4422	25.82	25.8318	27.9172	26.2023	25.7705	25.9104	26.1575	25.6258	26.5832	25.0939	25.9566	25.7856	9	8	8	8	7	7	6	8	8	4	12	10	7	9	8	7	6	6	7	8
P13727;P13727-2	P13727;P13727-2	Bone marrow proteoglycan;Eosinophil granule major basic protein	PRG2	28.0674	24.4664	NaN	22.0549	NaN	NaN	23.988	23.6969	24.4513	24.7757	NaN	NaN	26.4583	24.1275	23.0885	NaN	22.4718	NaN	24.7272	24.0477	6	3	NaN	1	NaN	NaN	3	1	3	1	NaN	NaN	4	2	1	NaN	1	NaN	2	2
P13747	P13747	HLA class I histocompatibility antigen, alpha chain E	HLA-E	22.2495	22.4284	NaN	24.0598	NaN	NaN	23.2054	23.0379	NaN	NaN	NaN	22.4219	22.6724	NaN	NaN	22.6126	NaN	NaN	22.2875	NaN	1	2	NaN	4	NaN	NaN	2	2	NaN	NaN	NaN	2	2	NaN	NaN	1	NaN	NaN	1	NaN
P13760	P13760	HLA class II histocompatibility antigen, DRB1-4 beta chain	HLA-DRB1	23.554	27.6988	26.8748	27.9218	NaN	NaN	28.0103	NaN	25.6905	26.1074	NaN	26.0045	30.2824	25.3995	28.4088	29.4253	NaN	24.7412	26.5667	25.7275	2	7	2	7	NaN	NaN	6	NaN	1	2	NaN	1	7	2	2	7	NaN	1	1	1
P13761	P13761	HLA class II histocompatibility antigen, DRB1-7 beta chain	HLA-DRB1	NaN	NaN	NaN	24.5115	23.3758	NaN	NaN	NaN	NaN	NaN	NaN	NaN	NaN	NaN	NaN	NaN	NaN	NaN	NaN	NaN	NaN	NaN	NaN	1	1	NaN	NaN	NaN	NaN	NaN	NaN	NaN	NaN	NaN	NaN	NaN	NaN	NaN	NaN	NaN
P13762	P13762	HLA class II histocompatibility antigen, DR beta 4 chain	HLA-DRB4	27.5828	24.5679	NaN	23.9846	22.1922	NaN	26.5952	NaN	NaN	NaN	NaN	NaN	25.7073	23.1817	NaN	25.7127	21.5066	NaN	NaN	NaN	6	4	NaN	4	1	NaN	6	NaN	NaN	NaN	NaN	NaN	6	1	NaN	6	1	NaN	NaN	NaN
P13796;P13796-2	P13796	Plastin-2	LCP1	28.8491	31.2805	28.7689	29.4779	30.294	29.7305	30.4729	30.3347	29.3514	30.5316	27.7076	30.3493	30.9318	30.3899	28.9856	31.4051	28.1857	28.7972	31.4495	29.0567	33	37	34	37	36	35	34	36	33	30	22	33	35	35	30	37	19	29	34	34
P13797;P13797-2;P13797-3	P13797;P13797-2;P13797-3	Plastin-3	PLS3	28.459	29.3945	27.232	27.102	28.2916	28.0108	28.8042	27.9812	28.4666	28.9599	27.0383	28.7315	28.4972	27.9534	28.4525	27.7054	28.1946	28.1555	28.3594	28.7178	24	27	20	19	23	20	23	18	21	21	13	21	23	19	22	16	18	19	19	23
P13798	P13798	Acylamino-acid-releasing enzyme	APEH	28.3651	26.9476	27.1994	27.2396	26.6036	26.6761	27.2334	26.7384	27.2368	25.3435	28.4972	26.799	27.4301	27.1602	27.2133	27.536	26.6954	27.6833	27.2951	27.1227	16	14	14	15	13	12	14	14	16	4	15	13	14	16	15	16	10	16	10	14
P13804;P13804-2	P13804;P13804-2	Electron transfer flavoprotein subunit alpha, mitochondrial	ETFA	29.1935	28.1146	28.8965	28.3874	27.9855	27.472	28.0832	28.3371	28.0051	27.1858	28.3932	27.6831	28.0781	28.1055	27.9133	28.0196	28.808	28.4587	27.8892	28.5412	14	14	14	14	15	14	14	14	13	8	14	14	14	13	13	14	13	15	9	15
P13807;P13807-2;P54840	P13807;P13807-2	Glycogen [starch] synthase, muscle	GYS1	24.4122	25.5435	26.4937	25.5857	25.3708	25.2291	24.922	25.6312	27.7007	25.3565	24.8423	24.914	25.3039	26.5185	23.6015	25.397	24.4941	25.9566	24.6822	24.8349	5	11	16	8	9	7	5	7	15	4	9	6	10	10	2	6	6	11	5	7
P13861-2;P13861	P13861-2;P13861	cAMP-dependent protein kinase type II-alpha regulatory subunit	PRKAR2A	27.3319	26.9849	26.7863	27.0371	26.8606	26.8797	26.8348	26.6287	26.8998	26.3977	26.9375	27.5568	27.4553	27.2692	27.1328	27.18	27.9509	26.8862	26.7491	27.3045	14	13	12	12	11	12	15	14	12	5	15	15	15	13	14	13	10	15	10	12
P13866-2;P13866	P13866-2;P13866	Sodium/glucose cotransporter 1	SLC5A1	NaN	NaN	NaN	NaN	NaN	NaN	NaN	NaN	NaN	NaN	25.3452	21.7215	NaN	NaN	NaN	NaN	NaN	NaN	NaN	NaN	NaN	NaN	NaN	NaN	NaN	NaN	NaN	NaN	NaN	NaN	4	1	NaN	NaN	NaN	NaN	NaN	NaN	NaN	NaN
P13928;P13928-3;P13928-2	P13928;P13928-3	Annexin A8	ANXA8	NaN	NaN	NaN	NaN	21.4281	NaN	22.5258	NaN	NaN	NaN	NaN	NaN	NaN	NaN	NaN	NaN	NaN	21.9786	NaN	NaN	NaN	NaN	NaN	NaN	1	NaN	2	NaN	NaN	NaN	NaN	NaN	NaN	NaN	NaN	NaN	NaN	2	NaN	NaN
P13984	P13984	General transcription factor IIF subunit 2	GTF2F2	NaN	22.9136	22.739	22.5457	23.1017	23.4359	22.8073	22.5353	23.3104	22.4112	22.7784	22.8069	NaN	22.7931	22.6555	22.7554	23.2234	23.3051	23.2148	23.048	1	2	1	1	2	3	2	1	2	1	1	2	NaN	1	2	2	2	2	1	2
P13987	P13987	CD59 glycoprotein	CD59	25.9273	27.056	27.7546	27.934	27.1656	27.1169	27.4658	26.9007	27.216	26.2913	27.3194	27.4888	28.0062	27.9987	28.5288	26.4996	26.2295	26.5942	26.5858	27.1032	2	3	3	3	3	2	3	3	3	3	3	3	3	3	3	3	3	3	4	3
P13995;P13995-2	P13995;P13995-2	Bifunctional methylenetetrahydrofolate dehydrogenase/cyclohydrolase, mitochondrial;NAD-dependent methylenetetrahydrofolate dehydrogenase;Methenyltetrahydrofolate cyclohydrolase	MTHFD2	22.9718	22.7696	NaN	23.4357	NaN	NaN	24.1751	NaN	NaN	NaN	NaN	NaN	NaN	NaN	NaN	23.3641	22.6224	23.6482	NaN	NaN	2	1	NaN	3	NaN	NaN	4	NaN	NaN	NaN	NaN	NaN	NaN	NaN	NaN	2	1	3	NaN	NaN
P14060	P14060	3 beta-hydroxysteroid dehydrogenase/Delta 5-->4-isomerase type 1;3-beta-hydroxy-Delta(5)-steroid dehydrogenase;Steroid Delta-isomerase	HSD3B1	NaN	NaN	NaN	NaN	NaN	NaN	NaN	NaN	NaN	NaN	NaN	18.6164	NaN	NaN	NaN	19.4712	19.43	NaN	NaN	NaN	NaN	NaN	NaN	NaN	NaN	NaN	NaN	NaN	NaN	NaN	NaN	1	NaN	NaN	NaN	2	1	NaN	NaN	NaN
P14061	P14061	Estradiol 17-beta-dehydrogenase 1	HSD17B1	18.4475	NaN	NaN	NaN	NaN	NaN	NaN	NaN	NaN	NaN	19.5337	NaN	NaN	19.8028	NaN	NaN	NaN	NaN	NaN	19.228	1	NaN	NaN	NaN	NaN	NaN	NaN	NaN	NaN	NaN	1	NaN	NaN	1	NaN	NaN	NaN	NaN	NaN	1
P14174	P14174	Macrophage migration inhibitory factor	MIF	30.2016	29.7352	30.8732	29.8045	29.9035	29.5582	30.1288	29.8159	30.6048	28.4652	30.1381	29.8735	29.8907	29.9001	30.108	29.3602	30.2156	29.8749	29.7078	30.0733	3	3	6	4	4	3	4	3	4	3	5	4	3	4	4	3	3	4	2	4
P14207	P14207	Folate receptor beta	FOLR2	23.1483	23.6609	22.567	22.1197	22.7758	23.4668	23.2477	23.4059	24.2947	23.562	NaN	24.3846	23.9005	23.5547	23.7184	24.0446	22.806	23.5537	24.6859	22.9151	1	3	1	1	3	2	2	3	4	2	NaN	4	4	1	3	4	2	2	3	2
P14209;P14209-2;P14209-3	P14209;P14209-2;P14209-3	CD99 antigen	CD99	25.5332	26.6429	26.2269	25.8933	25.9461	25.9286	26.3977	25.8801	25.1347	25.7449	26.8341	26.2385	26.3265	26.4239	25.0069	26.277	25.4131	25.3354	26.0891	25.6583	3	3	3	3	3	3	3	3	2	2	3	3	3	3	2	3	3	3	3	3
P14210-3;P14210;P14210-6;P14210-5;P14210-2;P14210-4	P14210-3;P14210	Hepatocyte growth factor;Hepatocyte growth factor alpha chain;Hepatocyte growth factor beta chain	HGF	NaN	NaN	NaN	NaN	NaN	NaN	NaN	NaN	NaN	NaN	NaN	NaN	NaN	NaN	NaN	NaN	NaN	NaN	NaN	NaN	NaN	NaN	NaN	NaN	NaN	NaN	NaN	NaN	NaN	1	NaN	NaN	NaN	1	NaN	NaN	NaN	NaN	NaN	NaN
P14314-2;P14314	P14314-2;P14314	Glucosidase 2 subunit beta	PRKCSH	29.5415	30.0325	30.054	30.3037	30.6356	31.0166	30.0856	30.1513	29.2693	29.0037	29.6125	29.956	29.728	29.4806	30.2194	29.9773	29.6256	29.9496	29.8314	29.9311	16	18	17	18	19	19	16	18	16	14	16	18	17	17	17	18	17	17	15	17
P14317;P14317-2	P14317	Hematopoietic lineage cell-specific protein	HCLS1	25.012	26.8082	25.6631	25.487	27.1085	25.4277	27.5321	26.2067	25.572	26.1363	24.3066	26.4632	26.5843	25.4126	25.3585	25.8888	22.7363	24.6387	27.728	24.8799	5	8	6	4	13	6	11	7	4	4	3	6	10	5	6	8	1	4	9	4
P14324-2;P14324	P14324-2;P14324	Farnesyl pyrophosphate synthase	FDPS	28.6669	27.6155	28.2149	27.4658	27.5491	27.7227	27.1556	28.0481	27.1412	25.2602	27.8872	28.113	27.6431	28.5711	28.1133	29.334	28.8694	27.6308	27.6976	28.0556	10	7	7	7	7	7	7	8	7	2	9	8	8	7	8	10	10	7	7	7
P14373;P14373-2	P14373;P14373-2	Zinc finger protein RFP	TRIM27	23.9773	NaN	NaN	24.0648	NaN	23.2301	NaN	NaN	NaN	NaN	NaN	NaN	NaN	NaN	NaN	NaN	NaN	NaN	NaN	NaN	6	NaN	NaN	5	NaN	2	NaN	NaN	NaN	NaN	NaN	NaN	NaN	NaN	NaN	NaN	NaN	NaN	NaN	NaN
P14384	P14384	Carboxypeptidase M	CPM	24.0895	23.9009	23.6817	23.0487	24.7308	23.4193	NaN	23.3318	22.9901	NaN	21.6999	25.6382	23.5066	24.5841	NaN	24.066	26.079	NaN	23.8485	24.2942	3	2	1	1	5	1	NaN	2	1	NaN	1	8	2	2	NaN	5	8	NaN	2	3
P14406	P14406	Cytochrome c oxidase subunit 7A2, mitochondrial	COX7A2	28.089	26.468	25.8484	26.3983	25.6313	25.3456	26.202	26.8697	25.806	24.9187	26.3518	26.1151	26.2853	26.3842	26.7691	26.2855	28.1043	26.9322	26.9963	26.604	2	2	2	2	2	2	2	2	2	1	2	2	2	2	2	2	2	2	2	2
P14543;P14543-2	P14543;P14543-2	Nidogen-1	NID1	26.9431	26.9238	27.3942	26.6475	27.4463	27.7938	26.2476	26.1634	27.4761	28.8272	27.6962	27.8339	28.3408	28.2703	28.3714	27.6317	27.3411	27.6976	27.97	27.9788	18	11	22	16	21	21	15	14	18	24	21	23	26	24	22	21	17	18	16	21
P14550	P14550	Alcohol dehydrogenase [NADP(+)]	AKR1A1	29.9361	29.9658	29.5991	29.7067	29.136	29.0305	29.5797	29.4973	29.3019	28.44	29.6686	29.8732	29.9599	29.7556	30.2031	29.3292	29.0785	29.7264	29.5773	29.5437	19	18	19	18	18	16	19	19	18	15	19	18	19	19	20	18	14	19	17	17
P14618;P30613-2	P14618	Pyruvate kinase PKM	PKM	32.8462	32.7067	33.8526	32.1379	32.292	31.5854	33.0254	33.8956	32.3673	33.1216	33.1005	32.3192	32.7963	32.3386	32.8543	32.4398	32.791	32.2159	32.8284	32.4195	39	36	39	33	37	34	39	37	38	35	39	37	37	39	38	38	37	37	36	37
P14618-2	P14618-2	Pyruvate kinase PKM	PKM	NaN	23.5174	23.4324	22.0739	23.2177	22.1838	23.8883	23.9	NaN	22.2952	NaN	22.47	22.6938	NaN	22.5049	NaN	NaN	21.6893	23.1844	22.4658	NaN	2	2	1	1	1	2	2	NaN	2	1	1	1	NaN	1	NaN	NaN	1	1	1
P14621	P14621	Acylphosphatase-2	ACYP2	22.4971	21.9382	23.1623	23.5621	22.3452	NaN	23.6537	22.2999	20.7911	NaN	23.0811	NaN	23.4174	21.7552	NaN	21.9011	22.0559	21.5187	22.5451	21.7019	2	1	2	2	1	1	2	2	1	NaN	1	NaN	1	1	NaN	1	1	1	1	2
P14625;Q58FF3	P14625	Endoplasmin	HSP90B1	31.9387	32.7611	32.0638	32.1847	32.4029	31.9009	32.8391	32.3005	31.8446	31.435	31.9448	32.4719	32.4884	32.036	32.6735	32.7367	31.9467	32.4502	32.8779	32.5519	42	43	41	40	41	40	44	45	43	36	42	42	44	40	43	44	38	46	41	45
P14678-2;P63162;P14678;P63162-2;P14678-3	P14678-2;P63162;P14678;P63162-2;P14678-3	Small nuclear ribonucleoprotein-associated proteins B and B;Small nuclear ribonucleoprotein-associated protein N	SNRPB;SNRPN	27.3186	27.1691	27.2025	27.3829	27.2114	27.3618	26.7596	27.3733	27.3577	25.4411	27.1886	27.4826	27.062	27.2757	27.2844	27.5601	27.4605	27.9296	26.9565	27.2169	7	7	7	8	6	6	6	7	6	5	7	7	6	7	6	7	6	7	4	7
P14735;P14735-2	P14735;P14735-2	Insulin-degrading enzyme	IDE	25.7774	26.4178	24.9994	26.5557	25.7687	25.9393	25.9955	26.1749	25.238	24.0905	26.0516	26.4454	25.7904	25.789	25.6039	26.5443	26.1029	27.478	26.9387	26.6702	12	12	6	13	10	10	13	12	12	1	9	16	12	9	11	13	8	16	9	13
P14778	P14778	Interleukin-1 receptor type 1;Interleukin-1 receptor type 1, membrane form;Interleukin-1 receptor type 1, soluble form	IL1R1	NaN	NaN	NaN	NaN	NaN	NaN	NaN	NaN	NaN	NaN	NaN	24.672	24.4171	25.5791	25.7384	NaN	NaN	23.5876	23.6802	NaN	NaN	NaN	1	NaN	NaN	NaN	NaN	NaN	NaN	NaN	NaN	1	2	1	1	NaN	NaN	1	1	1
P14780	P14780	Matrix metalloproteinase-9;67 kDa matrix metalloproteinase-9;82 kDa matrix metalloproteinase-9	MMP9	22.8947	NaN	NaN	NaN	20.4659	NaN	22.2127	23.8521	21.2892	24.2652	NaN	NaN	NaN	28.3694	NaN	25.3635	21.2899	21.9637	21.5118	NaN	4	NaN	NaN	NaN	1	NaN	3	5	2	3	NaN	NaN	NaN	17	NaN	7	1	1	3	1
P14854	P14854	Cytochrome c oxidase subunit 6B1	COX6B1	28.371	26.7542	26.7427	26.8147	26.1847	25.913	26.9532	27.0981	25.9581	24.824	26.9497	26.6862	26.5376	26.6078	27.316	26.7462	28.0247	27.4288	25.8569	27.1538	6	5	4	5	5	3	5	6	4	3	5	6	5	4	5	5	5	5	4	5
P14866;P14866-2	P14866;P14866-2	Heterogeneous nuclear ribonucleoprotein L	HNRNPL	29.2275	29.512	29.69	30.0813	29.7002	30.0018	29.6117	29.7837	29.5457	28.4243	29.3478	29.684	29.5513	29.5818	29.5422	29.8293	30.1232	30.0892	29.354	29.6271	15	18	18	19	19	18	19	17	19	10	16	21	15	16	15	20	19	16	15	16
P14868;P14868-2	P14868;P14868-2	Aspartate--tRNA ligase, cytoplasmic	DARS	28.8363	28.6848	28.6587	29.0797	28.6613	28.7315	28.8197	28.7037	29.1155	27.8629	29.1823	28.9912	28.7142	28.8989	28.8462	29.0139	28.6924	28.8988	28.49	28.8257	23	26	25	25	24	24	24	26	26	17	26	27	23	25	24	27	21	25	18	26
P14902	P14902	Indoleamine 2,3-dioxygenase 1	IDO1	20.7899	NaN	20.2672	21.8749	21.0305	NaN	26.077	26.4708	NaN	NaN	NaN	NaN	28.915	23.0378	NaN	24.6835	20.9775	19.9816	21.5657	20.8904	1	NaN	1	6	2	NaN	11	10	NaN	NaN	NaN	NaN	12	1	NaN	9	1	1	3	1
P14923	P14923	Junction plakoglobin	JUP	29.8372	28.0288	28.5602	29.757	28.9342	28.851	28.8097	28.2687	28.6383	26.7486	30.0404	29.2976	28.5191	28.3734	30.0083	28.5674	29.8882	29.7352	28.854	29.1692	34	22	26	32	29	29	29	26	26	8	34	29	24	24	34	25	28	31	21	29
P14927;P14927-2	P14927;P14927-2	Cytochrome b-c1 complex subunit 7	UQCRB	27.0023	25.6688	25.8173	25.9615	25.9309	24.9897	26.0095	26.1103	25.9532	24.6851	25.8866	25.5608	26.0941	26.2662	26.2735	26.088	27.0568	26.1587	25.747	25.9503	5	5	6	4	3	4	3	5	4	2	6	5	3	5	4	5	4	3	3	4
P15088	P15088	Mast cell carboxypeptidase A	CPA3	23.1854	23.5209	NaN	NaN	NaN	NaN	NaN	NaN	23.5496	NaN	NaN	23.6629	24.131	NaN	21.6219	NaN	NaN	NaN	NaN	NaN	1	4	NaN	NaN	NaN	NaN	NaN	NaN	3	NaN	NaN	2	3	NaN	1	NaN	NaN	NaN	NaN	NaN
P15090	P15090	Fatty acid-binding protein, adipocyte	FABP4	NaN	29.8078	NaN	17.2228	21.2161	20.9813	18.2293	18.2291	20.2824	NaN	NaN	26.034	22.2611	18.9194	32.6998	25.4385	NaN	30.2242	19.6672	21.6343	NaN	8	NaN	1	3	2	1	1	2	NaN	NaN	7	5	2	8	7	NaN	8	1	5
P15104	P15104	Glutamine synthetase	GLUL	26.2229	25.6409	24.9716	28.2561	25.4054	25.2057	25.2691	27.119	24.7636	25.5713	24.8523	25.4012	25.9848	28.0208	24.9349	28.7433	23.3602	25.9083	25.9228	29.4466	9	9	5	12	7	6	6	10	5	3	7	5	8	11	4	12	2	6	5	12
[truncated: 4,916 more rows]

## Sheet: Supplemental Table S4
Supplemental Table S4 : Proteins quantified (log2 LFQ intensities) and detected (razor + unique peptides) by MaxQuant in ovarian tumour samples analyzed on a Q Exactive Plus mass spectrometer
[truncated: 8,042 more rows]

[truncated: 9 more sheets: Supplemental Table S5, Supplemental Table S6, Supplemental Table S7, Supplemental Table S8, Supplemental Table S9, Supplemental Table S10, Supplemental Table S11, Supplemental Table S12, Supplemental Table S13]
